# Supplementary material
Source: publisher figshare collection journal article supplement (https://diabetesjournals.figshare.com/ndownloader/files/29066739)
Supplement: Supplementary file 1 [file 29066739]

## Sheet: Downregulated Ngn_H
geneID	geneSymbol	Chr	Start	End	Chromatin State
ENSMUSG00000000159.16	Igsf5	chr16	96359793	96363793	K4me3 K4me1 K27ac
ENSMUSG00000000214.11	Th	chr7	142894609	142898609	K4me1 K27ac
ENSMUSG00000000215.11	Ins2	chr7	142677685	142681685	K4me1 K27ac
ENSMUSG00000000216.8	Scnn1g	chr7	121732478	121736478	Repressed
ENSMUSG00000000263.15	Glra1	chr11	55605821	55609821	Bivalent
ENSMUSG00000000303.12	Cdh1	chr8	106602142	106606142	K4me3 K27ac
ENSMUSG00000000394.15	Gcg	chr2	62481645	62485645	Unmarked
ENSMUSG00000000544.14	Gpa33	chr1	166128339	166132339	K4me1
ENSMUSG00000001334.9	Fndc5	chr4	129134998	129138998	K4me3 K4me1
ENSMUSG00000001583.13	Tnk1	chr11	69856708	69860708	K4me3 K4me1 K27ac
ENSMUSG00000001663.10	Gstt1	chr10	75796584	75800584	K4me3 K4me1
ENSMUSG00000001670.13	Tat	chr8	109988436	109992436	Unmarked
ENSMUSG00000001700.10	Gramd3	chr18	56398374	56402374	K4me3 K4me1 K27ac
ENSMUSG00000002020.15	Ltbp2	chr12	84789843	84793843	K4me1
ENSMUSG00000002059.18	Rab34	chr11	78188352	78192352	K4me3 K27ac
ENSMUSG00000002147.18	Stat6	chr10	127641001	127645001	K4me3 K4me1 K27ac
ENSMUSG00000002265.17	Peg3	chr7	6728421	6732421	K4me3 K27ac
ENSMUSG00000002266.17	Zim1	chr7	6694429	6698429	Bivalent
ENSMUSG00000002324.8	Rec8	chr14	55616036	55620036	K4me1
ENSMUSG00000002771.12	Grin2d	chr7	45865129	45869129	Repressed
ENSMUSG00000002799.6	Jag2	chr12	112926448	112930448	Bivalent
ENSMUSG00000002908.17	Kcnn1	chr8	70861258	70865258	K4me3 K4me1
ENSMUSG00000002930.6	Ppp1r17	chr6	56015496	56019496	K4me1
ENSMUSG00000003070.6	Efna2	chr10	80177481	80181481	K4me3 K27ac
ENSMUSG00000003355.7	Fkbp11	chr15	98726152	98730152	K4me1
ENSMUSG00000003411.10	Rab3b	chr4	108877062	108881062	K4me3 K4me1
ENSMUSG00000003534.17	Ddr1	chr17	35698610	35702610	K4me3 K4me1 K27ac
ENSMUSG00000003559.8	As3mt	chr19	46705917	46709917	K4me3 K4me1 K27ac
ENSMUSG00000003865.16	Gys1	chr7	45445604	45449604	Unmarked
ENSMUSG00000004035.12	Gstm7	chr3	107929610	107933610	K4me1
ENSMUSG00000004151.17	Etv1	chr12	38781508	38785508	K4me3 K4me1
ENSMUSG00000004267.16	Eno2	chr6	124766331	124770331	Bivalent
ENSMUSG00000004347.17	Pde1c	chr6	56360392	56364392	K4me3 K4me1 K27ac
ENSMUSG00000004366.4	Sst	chr16	23888958	23892958	Bivalent
ENSMUSG00000004791.7	Pgf	chr12	85174274	85178274	K4me3 K4me1 K27ac
ENSMUSG00000004864.13	Mapk13	chr17	28767371	28771371	K4me3 K4me1 K27ac
ENSMUSG00000005087.17	Cd44	chr2	102899369	102903369	K4me3 K4me1
ENSMUSG00000005148.8	Klf5	chr14	99297153	99301153	K4me3 K27ac
ENSMUSG00000005373.13	Mlxipl	chr5	135104912	135108912	K4me3 K4me1 K27ac
ENSMUSG00000005514.14	Por	chr5	135723727	135727727	K4me1 K27ac
ENSMUSG00000006411.12	Nectin4	chr1	171368351	171372351	K4me1
ENSMUSG00000006527.16	Sfmbt1	chr14	30713166	30717166	Bivalent
ENSMUSG00000006529.16	Itih1	chr14	30941289	30945289	K4me1
ENSMUSG00000007594.10	Hapln4	chr8	70081456	70085456	Bivalent
ENSMUSG00000007783.10	Cpt1c	chr7	44971077	44975077	K4me1
ENSMUSG00000008153.12	Clstn3	chr6	124455885	124459885	Unmarked
ENSMUSG00000008206.16	Cers4	chr8	4491198	4495198	K4me3 K4me1 K27ac
ENSMUSG00000008393.9	Carhsp1	chr16	8670155	8674155	K4me3 K4me1 K27ac
ENSMUSG00000008601.12	Rab25	chr3	88541514	88545514	K4me1 K27ac
ENSMUSG00000009092.5	Derl3	chr10	75891412	75895412	K4me3 K4me1 K27ac
ENSMUSG00000009108.15	Gnat2	chr3	108090879	108094879	Unmarked
ENSMUSG00000009246.14	Trpm5	chr7	143092642	143096642	Unmarked
ENSMUSG00000009292.18	Trpm2	chr10	77967804	77971804	Bivalent
ENSMUSG00000009378.4	Slc16a12	chr19	34689547	34693547	Unmarked
ENSMUSG00000010066.15	Cacna2d2	chr9	107398068	107402068	Bivalent
ENSMUSG00000010505.16	Myt1	chr2	181761331	181765331	K4me3 K4me1 K27ac
ENSMUSG00000011382.8	Dhdh	chr7	45485402	45489402	K4me3 K4me1 K27ac
ENSMUSG00000012350.15	Ehf	chr2	103301278	103305278	K4me1 K27ac
ENSMUSG00000013076.17	Amotl1	chr9	14643056	14647056	Unmarked
ENSMUSG00000013419.7	Zfp651	chr9	121762016	121766016	Unmarked
ENSMUSG00000013921.15	Clip3	chr7	30289957	30293957	K4me3 K4me1 K27ac
ENSMUSG00000014602.15	Kif1a	chr1	93052302	93056302	Unmarked
ENSMUSG00000014791.10	Elmo3	chr8	105303642	105307642	K4me3 K27ac
ENSMUSG00000015112.15	Slc25a13	chr6	6189319	6193319	K4me1 K27ac
ENSMUSG00000015363.13	Trabd	chr15	89073123	89077123	K4me3 K4me1 K27ac
ENSMUSG00000015533.9	Itga2	chr13	114899943	114903943	Unmarked
ENSMUSG00000015942.9	Gtf2ird2	chr5	134212108	134216108	Unmarked
ENSMUSG00000016256.10	Ctsz	chr2	174437039	174441039	K4me1
ENSMUSG00000016552.13	Foxred2	chr15	77954722	77958722	Bivalent
ENSMUSG00000016758.4	Bik	chr15	83531543	83535543	Unmarked
ENSMUSG00000017311.15	Pyy	chr11	102105822	102109822	Bivalent
ENSMUSG00000017316.13	Ppy	chr11	102099310	102103310	K4me1
ENSMUSG00000017740.17	Slc12a5	chr2	164965982	164969982	Bivalent
ENSMUSG00000017756.9	Slc12a7	chr13	73761738	73765738	K4me3 K27ac
ENSMUSG00000018168.8	Ikzf3	chr11	98544031	98548031	Bivalent
ENSMUSG00000018470.8	Kcnab3	chr11	69324257	69328257	K4me3 K4me1 K27ac
ENSMUSG00000018474.18	Chd3	chr11	69345134	69349134	Unmarked
ENSMUSG00000018569.12	Cldn7	chr11	69964917	69968917	K4me3 K4me1 K27ac
ENSMUSG00000018581.15	Dnah11	chr12	117913964	117917964	K4me1
ENSMUSG00000018822.7	Sfrp5	chr19	42200252	42204252	Bivalent
ENSMUSG00000018999.14	Slc35b4	chr6	34161482	34165482	Unmarked
ENSMUSG00000019027.8	Dnah1	chr14	31267511	31271511	K4me3 K4me1
ENSMUSG00000019066.13	Rab3d	chr9	21916192	21920192	K4me3 K4me1 K27ac
ENSMUSG00000019368.13	Sec14l4	chr11	4029782	4033782	K4me1 K27ac
ENSMUSG00000019429.7	Ffar3	chr7	30854178	30858178	K4me1
ENSMUSG00000019467.15	Arhgef25	chr10	127187833	127191833	K4me3 K27ac
ENSMUSG00000019539.11	Rcn3	chr7	45086607	45090607	Unmarked
ENSMUSG00000019577.6	Pdk4	chr6	5494309	5498309	K4me3 K4me1
ENSMUSG00000019820.11	Utrn	chr10	12686862	12690862	Unmarked
ENSMUSG00000019852.7	Arfgef3	chr10	18741753	18745753	K4me3 K27ac
ENSMUSG00000019866.15	Crybg1	chr10	44002369	44006369	Bivalent
ENSMUSG00000019900.19	Rfx6	chr10	51675755	51679755	K4me3 K27ac
ENSMUSG00000019944.14	Rhobtb1	chr10	69206551	69210551	Unmarked
ENSMUSG00000019987.9	Arg1	chr10	24925484	24929484	K4me3 K4me1 K27ac
ENSMUSG00000020122.16	Egfr	chr11	16903184	16907184	Unmarked
ENSMUSG00000020170.4	Frs2	chr10	117146510	117150510	K4me3 K27ac
ENSMUSG00000020182.16	Ddc	chr11	11888401	11892401	Bivalent
ENSMUSG00000020256.14	Aldh1l2	chr10	83506120	83510120	Unmarked
ENSMUSG00000020261.15	Slc36a1	chr11	55202349	55206349	K4me3 K4me1 K27ac
ENSMUSG00000020263.14	Appl2	chr10	83609102	83613102	Unmarked
ENSMUSG00000020265.16	Sumo3	chr10	77604224	77608224	K4me3 K4me1 K27ac
ENSMUSG00000020432.12	Tcn2	chr11	3930078	3934078	K4me3 K4me1
ENSMUSG00000020528.14	Prpsap2	chr11	61760012	61764012	K4me3 K4me1
ENSMUSG00000020629.12	Adi1	chr12	28673230	28677230	K4me3 K4me1 K27ac
ENSMUSG00000020653.12	Klf11	chr12	24650153	24654153	K4me3 K4me1 K27ac
ENSMUSG00000020679.11	Hnf1b	chr11	83848062	83852062	K4me3 K4me1 K27ac
ENSMUSG00000020715.9	Ern1	chr11	106485808	106489808	K4me3 K4me1 K27ac
ENSMUSG00000020728.17	Cep112	chr11	108423290	108427290	K4me3 K27ac
ENSMUSG00000020732.13	Rab37	chr11	115152156	115156156	K4me3 K4me1 K27ac
ENSMUSG00000020734.13	Grin2c	chr11	115263429	115267429	Bivalent
ENSMUSG00000020788.15	Atp2a3	chr11	72959168	72963168	K4me3 K4me1 K27ac
ENSMUSG00000020847.15	Rph3al	chr11	75923891	75927891	K4me3 K4me1 K27ac
ENSMUSG00000020882.17	Cacnb1	chr11	98020634	98024634	K4me3 K4me1 K27ac
ENSMUSG00000020886.17	Dlg4	chr11	70014941	70018941	K4me3 K4me1 K27ac
ENSMUSG00000020891.11	Alox8	chr11	69195384	69199384	K4me3 K4me1
ENSMUSG00000020901.13	Pik3r5	chr11	68430124	68434124	K4me3 K4me1
ENSMUSG00000020940.13	Efcab15	chr11	103206548	103210548	Unmarked
ENSMUSG00000020990.5	Cdkl1	chr12	69788707	69792707	K4me3 K4me1 K27ac
ENSMUSG00000021069.17	Pygl	chr12	70225345	70229345	K4me3 K27ac
ENSMUSG00000021090.16	Lrrc9	chr12	72440241	72444241	K4me3 K4me1 K27ac
ENSMUSG00000021203.15	Otub2	chr12	103390653	103394653	K4me1
ENSMUSG00000021219.16	Rgs6	chr12	82615634	82619634	Bivalent
ENSMUSG00000021263.11	Degs2	chr12	108700297	108704297	K4me1
ENSMUSG00000021340.13	Gpld1	chr13	24953853	24957853	K4me1 K27ac
ENSMUSG00000021464.14	Ror2	chr13	53283549	53287549	K4me3 K27ac
ENSMUSG00000021474.9	Sfxn1	chr13	54083945	54087945	K4me1
ENSMUSG00000021559.14	Dapk1	chr13	60599946	60603946	K4me3 K27ac
ENSMUSG00000021679.4	S100z	chr13	95476721	95480721	K4me1 K27ac
ENSMUSG00000021703.9	Serinc5	chr13	92703781	92707781	Unmarked
ENSMUSG00000021733.11	Slc4a7	chr14	14701078	14705078	K4me3 K27ac
ENSMUSG00000021876.15	Rnase4	chr14	51089076	51093076	K4me3 K27ac
ENSMUSG00000021913.8	Ogdhl	chr14	32320018	32324018	Unmarked
ENSMUSG00000021947.11	Cryl1	chr14	57396496	57400496	K4me3 K4me1 K27ac
ENSMUSG00000021991.9	Cacna2d3	chr14	29095903	29099903	Unmarked
ENSMUSG00000021999.9	Cpb2	chr14	75270348	75274348	Unmarked
ENSMUSG00000022033.9	Pbk	chr14	65803836	65807836	K4me3 K4me1
ENSMUSG00000022043.19	Trim35	chr14	66295065	66299065	K4me3 K4me1 K27ac
ENSMUSG00000022129.4	Dct	chr14	118050244	118054244	K4me1
ENSMUSG00000022176.11	Rem2	chr14	54475470	54479470	K4me3 K4me1 K27ac
ENSMUSG00000022315.3	Slc30a8	chr15	52293552	52297552	Unmarked
ENSMUSG00000022415.12	Syngr1	chr15	80089333	80093333	K4me3 K4me1 K27ac
ENSMUSG00000022419.16	Deptor	chr15	55131452	55135452	K4me1 K27ac
ENSMUSG00000022435.6	Upk3a	chr15	85015140	85019140	K4me1
ENSMUSG00000022453.8	Naga	chr15	82336807	82340807	K4me3 K27ac
ENSMUSG00000022456.18	Sept3	chr15	82273399	82277399	Repressed
ENSMUSG00000022464.14	Slc38a4	chr15	97029211	97033211	Unmarked
ENSMUSG00000022525.13	Plaat1	chr16	29208107	29212107	Bivalent
ENSMUSG00000022577.17	Ly6h	chr15	75565216	75569216	Bivalent
ENSMUSG00000022629.17	Kif21a	chr15	90949306	90953306	Unmarked
ENSMUSG00000022797.16	Tfrc	chr16	32618388	32622388	Unmarked
ENSMUSG00000022809.4	Nr1i2	chr16	38292824	38296824	K4me1
ENSMUSG00000022853.7	Ehhadh	chr16	21785807	21789807	K4me1
ENSMUSG00000022861.17	Dgkg	chr16	22655028	22659028	Bivalent
ENSMUSG00000022900.14	Ildr1	chr16	36691977	36695977	K4me3 K27ac
ENSMUSG00000022941.8	Ripply3	chr16	94326419	94330419	K4me3 K4me1
ENSMUSG00000023036.14	Pcdhgc4	chr18	37813400	37817400	K4me3 K4me1 K27ac
ENSMUSG00000023232.17	Serinc2	chr4	130273218	130277218	K4me3 K4me1 K27ac
ENSMUSG00000023393.15	Slc17a9	chr2	180723262	180727262	K4me1
ENSMUSG00000023873.13	1700010I14Rik	chr17	8986356	8990356	K4me1
ENSMUSG00000023906.3	Cldn6	chr17	23677248	23681248	K4me3 K4me1 K27ac
ENSMUSG00000023911.12	Flywch2	chr17	23784081	23788081	K4me3 K4me1 K27ac
ENSMUSG00000024013.15	Fgd2	chr17	29371350	29375350	Unmarked
ENSMUSG00000024027.8	Glp1r	chr17	30899816	30903816	Bivalent
ENSMUSG00000024030.7	Abcg1	chr17	31108964	31112964	Unmarked
ENSMUSG00000024039.15	Cbs	chr17	31625491	31629491	Unmarked
ENSMUSG00000024112.16	Cacna1h	chr17	25378651	25382651	Unmarked
ENSMUSG00000024130.16	Abca3	chr17	24350096	24354096	K4me3 K27ac
ENSMUSG00000024197.10	Plin3	chr17	56288511	56292511	K4me3 K4me1 K27ac
ENSMUSG00000024222.17	Fkbp5	chr17	28426629	28430629	Unmarked
ENSMUSG00000024376.7	Epb41l4a	chr18	33889974	33893974	K4me1
ENSMUSG00000024386.9	Proc	chr18	32136182	32140182	K4me1
ENSMUSG00000024411.11	Aqp4	chr18	15398002	15402002	K4me1
ENSMUSG00000024553.8	Galr1	chr18	82404777	82408777	K4me3 K4me1
ENSMUSG00000024766.15	Lipo3	chr19	33559382	33563382	Unmarked
ENSMUSG00000024846.6	Cst6	chr19	5347357	5351357	K4me3 K4me1
ENSMUSG00000024899.7	Papss2	chr19	32618004	32622004	Unmarked
ENSMUSG00000024924.14	Vldlr	chr19	27215457	27219457	K4me3 K4me1 K27ac
ENSMUSG00000024940.11	Ltbp3	chr19	5748650	5752650	K4me1
ENSMUSG00000024942.17	Capn1	chr19	6013203	6017203	K4me3 K4me1 K27ac
ENSMUSG00000024990.13	Rbp4	chr19	38122828	38126828	K4me3 K4me1 K27ac
ENSMUSG00000025092.7	Hspa12a	chr19	58941654	58945654	K4me3 K4me1
ENSMUSG00000025127.15	Gcgr	chr11	120528698	120532698	Repressed
ENSMUSG00000025188.15	Hps1	chr19	42776647	42780647	K4me3 K27ac
ENSMUSG00000025194.5	Abcc2	chr19	43808521	43812521	K4me1
ENSMUSG00000025221.16	Kcnip2	chr19	45792299	45796299	K4me1
ENSMUSG00000025318.13	Jph3	chr8	121727622	121731622	Bivalent
ENSMUSG00000025321.14	Itgb8	chr12	119236801	119240801	K4me3 K27ac
ENSMUSG00000025329.3	Padi1	chr4	140843778	140847778	K4me1
ENSMUSG00000025375.15	Aatk	chr11	120018168	120022168	Unmarked
ENSMUSG00000025429.9	Pstpip2	chr18	77792544	77796544	Bivalent
ENSMUSG00000025480.5	Syce1	chr7	140785837	140789837	Unmarked
ENSMUSG00000025504.14	Eps8l2	chr7	141355995	141359995	Unmarked
ENSMUSG00000025576.17	Rbfox3	chr11	118907550	118911550	K4me3 K4me1 K27ac
ENSMUSG00000025582.4	Nptx1	chr11	119545753	119549753	Bivalent
ENSMUSG00000025586.17	Cpeb1	chr7	81370441	81374441	Unmarked
ENSMUSG00000025815.13	Dhtkd1	chr2	5909836	5913836	Unmarked
ENSMUSG00000025855.13	Prkar1b	chr5	139128576	139132576	K4me3 K4me1 K27ac
ENSMUSG00000025867.8	Cplx2	chr13	54369348	54373348	K4me3 K27ac
ENSMUSG00000025935.10	Tram1	chr1	13587875	13591875	K4me3 K27ac
ENSMUSG00000026031.15	Cflar	chr1	58709509	58713509	K4me3 K27ac
ENSMUSG00000026049.11	Tex30	chr1	44100414	44104414	K4me3 K27ac
ENSMUSG00000026090.16	2010300C02Rik	chr1	37623242	37627242	Unmarked
ENSMUSG00000026131.20	Dst	chr1	34087291	34091291	Bivalent
ENSMUSG00000026175.12	Vil1	chr1	74419415	74423415	K4me1 K27ac
ENSMUSG00000026196.7	Bard1	chr1	71101146	71105146	K4me3 K27ac
ENSMUSG00000026303.6	Mlph	chr1	90913084	90917084	Bivalent
ENSMUSG00000026304.13	Rab17	chr1	90967644	90971644	K4me1
ENSMUSG00000026312.17	Cdh7	chr1	109981005	109985005	Bivalent
ENSMUSG00000026432.7	Avpr1b	chr1	131597238	131601238	Bivalent
ENSMUSG00000026442.14	Nfasc	chr1	132739778	132743778	K4me3 K4me1
ENSMUSG00000026443.3	Lrrn2	chr1	132878354	132882354	Repressed
ENSMUSG00000026579.8	F5	chr1	164149837	164153837	K4me1
ENSMUSG00000026617.16	Bpnt1	chr1	185330179	185334179	K4me3 K4me1 K27ac
ENSMUSG00000026692.12	Fmo4	chr1	162811926	162815926	K4me1
ENSMUSG00000026811.18	St6galnac6	chr2	32606084	32610084	K4me3 K4me1
ENSMUSG00000026817.14	Ak1	chr2	32627520	32631520	K4me1 K27ac
ENSMUSG00000026834.13	Acvr1c	chr2	58355895	58359895	K4me3 K4me1
ENSMUSG00000026922.13	Agpat2	chr2	26601716	26605716	K4me3 K4me1 K27ac
ENSMUSG00000026959.13	Grin1	chr2	25317120	25321120	Bivalent
ENSMUSG00000026986.14	Hnmt	chr2	24047079	24051079	K4me3 K4me1
ENSMUSG00000027004.3	Frzb	chr2	80436630	80440630	Unmarked
ENSMUSG00000027166.14	Dnajc24	chr2	106001202	106005202	K4me3 K27ac
ENSMUSG00000027168.21	Pax6	chr2	105683321	105687321	Bivalent
ENSMUSG00000027215.13	Cd82	chr2	93450679	93454679	K4me1 K27ac
ENSMUSG00000027219.13	Slc28a2	chr2	122454398	122458398	Unmarked
ENSMUSG00000027227.7	Sord	chr2	122232748	122236748	K4me3 K4me1
ENSMUSG00000027230.9	Creb3l1	chr2	92022502	92026502	K4me3 K4me1
ENSMUSG00000027259.15	Adal	chr2	121138520	121142520	K4me3 K4me1 K27ac
ENSMUSG00000027315.13	Spint1	chr2	119235361	119239361	K4me3 K4me1 K27ac
ENSMUSG00000027376.15	Prom2	chr2	127533197	127537197	Unmarked
ENSMUSG00000027434.11	Nkx2-2	chr2	147184404	147188404	K4me3 K4me1 K27ac
ENSMUSG00000027522.15	Stx16	chr2	174074307	174078307	K4me3 K4me1 K27ac
ENSMUSG00000027524.9	Edn3	chr2	174767921	174771921	Unmarked
ENSMUSG00000027536.6	Chmp4c	chr3	10364957	10368957	K4me1
ENSMUSG00000027547.17	Sall4	chr2	168765029	168769029	K4me3 K27ac
ENSMUSG00000027630.13	Tbl1xr1	chr3	22074651	22078651	K4me3 K27ac
ENSMUSG00000027690.13	Slc2a2	chr3	28719516	28723516	K4me1
ENSMUSG00000027748.11	Trpc4	chr3	54154372	54158372	Bivalent
ENSMUSG00000027801.7	Tm4sf4	chr3	57423313	57427313	K4me3 K4me1 K27ac
ENSMUSG00000027855.13	Sycp1	chr3	102934100	102938100	Bivalent
ENSMUSG00000027893.14	Ahcyl1	chr3	107675767	107679767	Unmarked
ENSMUSG00000027947.11	Il6ra	chr3	89911162	89915162	K4me3 K4me1
ENSMUSG00000027971.16	Ndst4	chr3	125678986	125682986	Unmarked
ENSMUSG00000028017.7	Egf	chr3	129723077	129727077	Unmarked
ENSMUSG00000028059.16	Arhgef2	chr3	88621353	88625353	K4me3 K4me1 K27ac
ENSMUSG00000028064.17	Sema4a	chr3	88453314	88457314	K4me1 K27ac
ENSMUSG00000028088.14	Fmo5	chr3	97626882	97630882	K4me1
ENSMUSG00000028152.10	Tspan5	chr3	138776205	138780205	K4me1
ENSMUSG00000028264.16	Spaca1	chr4	34048191	34052191	Bivalent
ENSMUSG00000028469.15	Npr2	chr4	43646004	43650004	Bivalent
ENSMUSG00000028536.12	2610528J11Rik	chr4	118524998	118528998	K4me3 K4me1 K27ac
ENSMUSG00000028541.14	B4galt2	chr4	117881112	117885112	K4me3 K4me1
ENSMUSG00000028546.17	Elavl4	chr4	110290722	110294722	K4me1
ENSMUSG00000028607.16	Cpt2	chr4	107910766	107914766	K4me1 K27ac
ENSMUSG00000028626.5	Col9a2	chr4	121037747	121041747	K4me3 K4me1 K27ac
ENSMUSG00000028661.8	Epha8	chr4	136954816	136958816	Bivalent
ENSMUSG00000028749.7	Pla2g2f	chr4	138755626	138759626	K4me3 K4me1 K27ac
ENSMUSG00000028755.3	Cda	chr4	138341649	138345649	K4me1 K27ac
ENSMUSG00000028804.20	Csmd2	chr4	128545935	128549935	Unmarked
ENSMUSG00000028825.7	Rhd	chr4	134877809	134881809	K4me1
ENSMUSG00000028841.14	Cnksr1	chr4	134236399	134240399	K4me3 K4me1
ENSMUSG00000028845.15	Tekt2	chr4	126323199	126327199	K4me1 K27ac
ENSMUSG00000028860.13	Sytl1	chr4	133261087	133265087	K4me1
ENSMUSG00000028865.14	Cd164l2	chr4	133210905	133214905	K4me3 K4me1
ENSMUSG00000028957.12	Per3	chr4	151042665	151046665	K4me3 K4me1 K27ac
ENSMUSG00000028976.10	Slc2a5	chr4	150137552	150141552	K4me1
ENSMUSG00000028989.3	Angptl7	chr4	148498460	148502460	K4me1
ENSMUSG00000029007.8	Agtrap	chr4	148082776	148086776	K4me1 K27ac
ENSMUSG00000029093.14	Sorcs2	chr5	36396124	36400124	K4me3 K4me1
ENSMUSG00000029102.9	Hgfac	chr5	35039576	35043576	K4me1 K27ac
ENSMUSG00000029153.11	Ociad2	chr5	73336992	73340992	K4me1
ENSMUSG00000029163.9	Emilin1	chr5	30917920	30921920	K4me1
ENSMUSG00000029173.12	Sepsecs	chr5	52667708	52671708	K4me3 K27ac
ENSMUSG00000029273.10	Sult1d1	chr5	87558191	87562191	Bivalent
ENSMUSG00000029419.8	Ajm1	chr2	25578263	25582263	Bivalent
ENSMUSG00000029420.14	Rimbp2	chr5	128843671	128847671	Bivalent
ENSMUSG00000029470.15	P2rx4	chr5	122722654	122726654	K4me1
ENSMUSG00000029475.17	Kdm2b	chr5	122915724	122919724	Unmarked
ENSMUSG00000029576.17	Radil	chr5	142549077	142553077	K4me3 K4me1
ENSMUSG00000029602.11	Rasal1	chr5	120651366	120655366	K4me1
ENSMUSG00000029603.15	Dtx1	chr5	120693403	120697403	Bivalent
ENSMUSG00000029635.15	Cdk8	chr5	146229229	146233229	K4me3 K27ac
ENSMUSG00000029651.16	Mtus2	chr5	147955341	147959341	Bivalent
ENSMUSG00000029656.13	C8b	chr4	104764316	104768316	Unmarked
ENSMUSG00000029759.9	Pon3	chr6	5254233	5258233	K4me3 K4me1
ENSMUSG00000029777.10	Gars	chr6	55048094	55052094	K4me1 K27ac
ENSMUSG00000029864.7	Gstk1	chr6	42243988	42247988	Repressed
ENSMUSG00000029878.6	Dbpht2	chr12	74294667	74298667	Unmarked
ENSMUSG00000030067.17	Foxp1	chr6	99161018	99165018	K4me1
ENSMUSG00000030170.14	Wnt5b	chr6	119465211	119469211	K4me1
ENSMUSG00000030281.16	Il17rc	chr6	113469426	113473426	K4me3 K4me1
ENSMUSG00000030287.15	Itpr2	chr6	146500223	146504223	Repressed
ENSMUSG00000030319.8	Cand2	chr6	115772537	115776537	K4me3 K4me1 K27ac
ENSMUSG00000030321.15	Efcab12	chr6	115836412	115840412	K4me1 K27ac
ENSMUSG00000030376.8	Slc8a2	chr7	16128347	16132347	K4me3 K27ac
ENSMUSG00000030443.16	Zfp583	chr7	6329278	6333278	K4me3 K4me1
ENSMUSG00000030544.5	Mesp1	chr7	79791788	79795788	Bivalent
ENSMUSG00000030598.15	Fbxo17	chr7	28714803	28718803	Unmarked
ENSMUSG00000030701.17	Plekhb1	chr7	100656456	100660456	K4me1
ENSMUSG00000030731.13	Syt3	chr7	44382101	44386101	K4me3 K4me1
ENSMUSG00000030788.16	Rnf141	chr7	110819283	110823283	K4me1 K27ac
ENSMUSG00000030793.4	Pycard	chr7	127991527	127995527	K4me1
ENSMUSG00000030800.10	Prss8	chr7	127928104	127932104	K4me3 K4me1 K27ac
ENSMUSG00000030838.19	Ush1c	chr7	46236464	46240464	K4me3 K4me1 K27ac
ENSMUSG00000030873.9	Scnn1b	chr7	121897227	121901227	K4me1
ENSMUSG00000030909.6	Anks4b	chr7	120171857	120175857	K4me1
ENSMUSG00000031442.21	Mcf2l	chr8	13011061	13015061	Unmarked
ENSMUSG00000031559.15	4930555F03Rik	chr8	49483480	49487480	Unmarked
ENSMUSG00000031596.15	Slc7a2	chr8	40872947	40876947	Bivalent
ENSMUSG00000031791.8	Tmem38a	chr8	72570054	72574054	K4me3 K4me1 K27ac
ENSMUSG00000031803.8	B3gnt3	chr8	71699789	71703789	K4me3 K4me1 K27ac
ENSMUSG00000031838.8	Ifi30	chr8	70764663	70768663	K4me3 K4me1
ENSMUSG00000031845.15	Bco1	chr8	117093997	117097997	K4me1
ENSMUSG00000031853.5	Map3k21	chr8	125908449	125912449	K4me3 K4me1
ENSMUSG00000031974.8	Abcb10	chr8	123981122	123985122	K4me3 K4me1 K27ac
ENSMUSG00000031995.9	St14	chr9	31101538	31105538	Unmarked
ENSMUSG00000032066.9	Bco2	chr9	50553181	50557181	K4me1
ENSMUSG00000032091.15	Tmprss4	chr9	45178653	45182653	K4me1 K27ac
ENSMUSG00000032101.6	Ddx25	chr9	35556528	35560528	Repressed
ENSMUSG00000032109.15	Nlrx1	chr9	44266128	44270128	Bivalent
ENSMUSG00000032193.9	Ldlr	chr9	21743322	21747322	Unmarked
ENSMUSG00000032253.13	Phip	chr9	82926151	82930151	Unmarked
ENSMUSG00000032280.16	Tle3	chr9	61371384	61375384	K4me3 K4me1 K27ac
ENSMUSG00000032313.11	Tmem266	chr9	55324948	55328948	K4me3 K4me1
ENSMUSG00000032349.13	Elovl5	chr9	77939290	77943290	K4me1
ENSMUSG00000032356.12	Rasgrf1	chr9	89907908	89911908	Bivalent
ENSMUSG00000032456.13	Nmnat3	chr9	98294603	98298603	K4me3 K4me1 K27ac
ENSMUSG00000032564.16	Cpne4	chr9	104567482	104571482	Repressed
ENSMUSG00000032657.15	Fam189b	chr3	89181202	89185202	K4me1
ENSMUSG00000032679.12	Cd59a	chr2	104093800	104097800	K4me3 K4me1 K27ac
ENSMUSG00000032816.15	Igdcc4	chr9	65099485	65103485	K4me3 K4me1 K27ac
ENSMUSG00000032852.3	Rspo4	chr2	151840926	151844926	Bivalent
ENSMUSG00000032875.8	Arhgef17	chr7	100930107	100934107	K4me3 K4me1 K27ac
ENSMUSG00000032890.17	Rims3	chr4	120859776	120863776	Unmarked
ENSMUSG00000033022.8	Cdo1	chr18	46726395	46730395	K4me3 K27ac
ENSMUSG00000033061.15	Resp18	chr1	75276415	75280415	Bivalent
ENSMUSG00000033209.17	Ttc28	chr5	110877821	110881821	K4me1
ENSMUSG00000033316.14	Galnt9	chr5	110542354	110546354	Bivalent
ENSMUSG00000033318.7	Gstt2	chr10	75832383	75836383	K4me3 K4me1
ENSMUSG00000033488.11	Cryzl2	chr1	157470267	157474267	Unmarked
ENSMUSG00000033579.16	Fa2h	chr8	111391818	111395818	K4me3 K27ac
ENSMUSG00000033684.14	Qsox1	chr1	155810838	155814838	K4me3 K27ac
ENSMUSG00000033685.13	Ucp2	chr7	100491385	100495385	K4me3 K4me1 K27ac
ENSMUSG00000033707.9	Lrrc24	chr15	76720159	76724159	Repressed
ENSMUSG00000033740.17	St18	chr1	6732869	6736869	Bivalent
ENSMUSG00000033849.3	B3galt2	chr1	143638663	143642663	K4me3 K4me1 K27ac
ENSMUSG00000033880.11	Lgals3bp	chr11	118396151	118400151	K4me1 K27ac
ENSMUSG00000034107.10	Ano7	chr1	93371929	93375929	K4me1
ENSMUSG00000034111.6	Tmed8	chr12	87198454	87202454	K4me3 K27ac
ENSMUSG00000034127.15	Tspan8	chr10	115815270	115819270	K4me1
ENSMUSG00000034156.16	Tspoap1	chr11	87776792	87780792	K4me3 K4me1
ENSMUSG00000034243.17	Golgb1	chr16	36873139	36877139	K4me3 K4me1 K27ac
ENSMUSG00000034245.10	Hdac11	chr6	91154817	91158817	K4me3 K4me1 K27ac
ENSMUSG00000034427.17	Myo15b	chr11	115888238	115892238	K4me1 K27ac
ENSMUSG00000034435.6	Tmem30b	chr12	73544392	73548392	Bivalent
ENSMUSG00000034467.7	Dynlrb2	chr8	116503014	116507014	K4me3 K4me1
ENSMUSG00000034673.14	Pbx2	chr17	34590262	34594262	K4me3 K4me1 K27ac
ENSMUSG00000034758.12	Tle6	chr10	81598875	81602875	K4me1 K27ac
ENSMUSG00000034785.14	Dio1	chr4	107305124	107309124	K4me1
ENSMUSG00000034871.2	Fam151a	chr4	106731888	106735888	K4me1
ENSMUSG00000034903.18	Cobll1	chr2	65236626	65240626	K4me3 K4me1 K27ac
ENSMUSG00000034917.8	Tjp3	chr10	81289581	81293581	K4me3 K27ac
ENSMUSG00000034919.2	Ttc22	chr4	106633976	106637976	Unmarked
ENSMUSG00000034936.2	Arl4d	chr11	101663540	101667540	K4me3 K4me1
ENSMUSG00000034949.18	Zfr2	chr10	81231154	81235154	K4me3 K27ac
ENSMUSG00000035000.8	Dpp4	chr2	62410021	62414021	K4me3 K4me1
ENSMUSG00000035041.8	Creb3l3	chr10	81089906	81093906	Unmarked
ENSMUSG00000035121.6	Neil2	chr14	63191525	63195525	K4me3 K4me1 K27ac
ENSMUSG00000035285.6	Nat14	chr7	4920250	4924250	K4me3 K4me1 K27ac
ENSMUSG00000035469.17	Rcbtb1	chr14	59199227	59203227	K4me3 K27ac
ENSMUSG00000035486.14	Plk5	chr10	80354458	80358458	Bivalent
ENSMUSG00000035498.10	Cdcp1	chr9	123176106	123180106	Unmarked
ENSMUSG00000035606.8	Ky	chr9	102519335	102523335	Unmarked
ENSMUSG00000035638.14	Muc20	chr16	32795435	32799435	K4me1 K27ac
ENSMUSG00000035694.15	Caps2	chr10	112170539	112174539	Unmarked
ENSMUSG00000035713.15	Usp35	chr7	97313995	97317995	Unmarked
ENSMUSG00000035804.5	Ins1	chr19	52262296	52266296	K4me1 K27ac
ENSMUSG00000035852.11	Misp	chr10	79818988	79822988	K4me3 K4me1 K27ac
ENSMUSG00000035964.8	Tmem59l	chr8	70485358	70489358	Bivalent
ENSMUSG00000036353.13	P2ry12	chr3	59225581	59229581	Unmarked
ENSMUSG00000036459.15	Wtip	chr7	34117060	34121060	K4me1
ENSMUSG00000036473.16	Tbc1d24	chr17	24203514	24207514	Bivalent
ENSMUSG00000036492.12	Rnf39	chr17	36940917	36944917	Bivalent
ENSMUSG00000036687.13	Tmem184a	chr5	139817917	139821917	Unmarked
ENSMUSG00000036760.7	Kcnk9	chr15	72544340	72548340	Repressed
ENSMUSG00000036834.16	Plch1	chr3	63897442	63901442	K4me3 K27ac
ENSMUSG00000036856.4	Wnt4	chr4	137275488	137279488	K4me3 K4me1 K27ac
ENSMUSG00000036872.16	Abcc12	chr8	86564590	86568590	Unmarked
ENSMUSG00000036887.5	C1qa	chr4	136896803	136900803	K4me1 K27ac
ENSMUSG00000036908.17	Unc93b1	chr19	3934078	3938078	K4me1
ENSMUSG00000036923.12	Stox1	chr10	62723801	62727801	K4me3 K4me1 K27ac
ENSMUSG00000036944.6	Tmem71	chr15	66559103	66563103	K4me1
ENSMUSG00000037126.16	Psd	chr19	46325156	46329156	Bivalent
ENSMUSG00000037185.9	Krt80	chr15	101365713	101369713	K4me3 K4me1 K27ac
ENSMUSG00000037239.8	Spred3	chr7	29167841	29171841	K4me3 K4me1 K27ac
ENSMUSG00000037306.13	Man1c1	chr4	134701767	134705767	K4me3 K27ac
ENSMUSG00000037463.14	Fbxo27	chr7	28694650	28698650	Unmarked
ENSMUSG00000037579.7	Kcnh3	chr15	99225818	99229818	Bivalent
ENSMUSG00000037681.13	Esyt3	chr9	99356557	99360557	Bivalent
ENSMUSG00000037738.11	Nek5	chr8	22123038	22127038	Unmarked
ENSMUSG00000037762.6	Slc16a9	chr10	70243099	70247099	K4me3 K4me1
ENSMUSG00000037902.18	Sirpa	chr2	129591561	129595561	K4me3 K4me1 K27ac
ENSMUSG00000038009.7	Dnajc22	chr15	99091169	99095169	Bivalent
ENSMUSG00000038024.17	Dennd4c	chr4	86775842	86779842	Unmarked
ENSMUSG00000038060.15	Dlec1	chr9	119100477	119104477	K4me1 K27ac
ENSMUSG00000038167.6	Plekhg6	chr6	125378793	125382793	K4me3 K4me1 K27ac
ENSMUSG00000038172.14	Ttc39b	chr4	83322239	83326239	Bivalent
ENSMUSG00000038178.16	Slc43a2	chr11	75529693	75533693	K4me3 K4me1 K27ac
ENSMUSG00000038248.8	Sobp	chr10	43172521	43176521	Repressed
ENSMUSG00000038260.10	Trpm4	chr7	45331780	45335780	K4me3 K4me1 K27ac
ENSMUSG00000038267.15	Slc22a23	chr13	34342451	34346451	K4me3 K27ac
ENSMUSG00000038296.14	Galnt18	chr7	111777977	111781977	K4me3 K4me1
ENSMUSG00000038486.9	Sv2a	chr3	96190545	96194545	Unmarked
ENSMUSG00000038539.15	Atf5	chr7	44814574	44818574	K4me3 K4me1 K27ac
ENSMUSG00000038560.7	Sp6	chr11	97011393	97015393	Repressed
ENSMUSG00000038630.8	Zkscan16	chr4	58941627	58945627	K4me3 K4me1
ENSMUSG00000038708.10	Golga4	chr9	118563275	118567275	Unmarked
ENSMUSG00000038738.15	Shank1	chr7	44308252	44312252	K4me3 K4me1
ENSMUSG00000038764.14	Ptpn3	chr4	57298375	57302375	K4me3 K4me1 K27ac
ENSMUSG00000038765.13	Lmx1b	chr2	33638480	33642480	K4me3 K4me1 K27ac
ENSMUSG00000038793.8	Lefty1	chr1	180934870	180938870	Bivalent
ENSMUSG00000038884.14	Shfl	chr9	20866679	20870679	Bivalent
ENSMUSG00000038984.4	Tspyl5	chr15	33685884	33689884	K4me3 K4me1
ENSMUSG00000039058.11	Ak5	chr3	152476515	152480515	K4me3 K4me1 K27ac
ENSMUSG00000039059.11	Hrh3	chr2	180102151	180106151	Bivalent
ENSMUSG00000039062.15	Anpep	chr7	79823499	79827499	Unmarked
ENSMUSG00000039126.10	Prune2	chr19	17136738	17140738	K4me3 K4me1
ENSMUSG00000039230.14	Tbcd	chr11	121542200	121546200	K4me1 K27ac
ENSMUSG00000039236.18	Isg20	chr7	78911980	78915980	K4me3 K4me1 K27ac
ENSMUSG00000039263.16	Npepl1	chr2	174109153	174113153	K4me3 K4me1 K27ac
ENSMUSG00000039313.14	Minar1	chr9	89601391	89605391	Unmarked
ENSMUSG00000039395.8	Mreg	chr1	72210307	72214307	K4me3 K4me1
ENSMUSG00000039396.11	Neil3	chr8	53609483	53613483	Unmarked
ENSMUSG00000039431.16	Mtmr7	chr8	40588514	40592514	K4me1
ENSMUSG00000039529.9	Atp8b1	chr18	64553200	64557200	Unmarked
ENSMUSG00000039607.16	Rbms3	chr9	117249801	117253801	K4me3 K4me1 K27ac
ENSMUSG00000039661.14	Dusp26	chr8	31087470	31091470	Bivalent
ENSMUSG00000039671.18	Zmynd8	chr2	165882772	165886772	K4me3 K4me1 K27ac
ENSMUSG00000039745.8	Htatip2	chr7	49757114	49761114	K4me3 K4me1
ENSMUSG00000039809.10	Gabbr2	chr4	46722391	46726391	Unmarked
ENSMUSG00000040170.13	Fmo2	chr1	162896720	162900720	K4me1
ENSMUSG00000040181.14	Fmo1	chr1	162828473	162832473	Unmarked
ENSMUSG00000040189.18	Ccdc114	chr7	45922242	45926242	K4me3 K4me1 K27ac
ENSMUSG00000040234.16	Tm7sf3	chr6	146640814	146644814	K4me3 K4me1 K27ac
ENSMUSG00000040434.16	Large2	chr2	92368073	92372073	K4me3 K4me1 K27ac
ENSMUSG00000040525.13	Cblc	chr7	19794809	19798809	K4me3 K4me1
ENSMUSG00000040699.13	Limd2	chr11	106157927	106161927	K4me3 K4me1 K27ac
ENSMUSG00000040794.5	C1qtnf4	chr2	90883859	90887859	Bivalent
ENSMUSG00000040811.15	Eml2	chr7	19179180	19183180	K4me3 K4me1 K27ac
ENSMUSG00000040856.17	Dlk1	chr12	109451454	109455454	Bivalent
ENSMUSG00000040938.16	Slc16a11	chr11	70212114	70216114	Bivalent
ENSMUSG00000040969.14	Arhgef38	chr3	133135302	133139302	Unmarked
ENSMUSG00000040972.8	Igsf21	chr4	140244784	140248784	Bivalent
ENSMUSG00000040998.18	Npnt	chr3	132947814	132951814	K4me3 K27ac
ENSMUSG00000041117.8	Ccdc8	chr7	16990707	16994707	K4me3 K27ac
ENSMUSG00000041237.12	Pklr	chr3	89134173	89138173	K4me1 K27ac
ENSMUSG00000041261.9	Car8	chr4	8237041	8241041	K4me3 K4me1
ENSMUSG00000041351.16	Rap1gap	chr4	137678752	137682752	K4me3 K4me1
ENSMUSG00000041605.16	Inava	chr1	136232264	136236264	K4me3 K27ac
ENSMUSG00000041608.8	Entpd3	chr9	120556033	120560033	Unmarked
ENSMUSG00000041642.18	Kif21b	chr1	136129429	136133429	K4me3 K27ac
ENSMUSG00000041762.16	Gpr155	chr2	73384572	73388572	K4me3 K27ac
ENSMUSG00000041831.16	Sytl3	chr17	6700951	6704951	Unmarked
ENSMUSG00000041907.9	Gpr45	chr1	42951138	42955138	K4me3 K4me1
ENSMUSG00000041945.12	Mfsd9	chr1	40788657	40792657	Repressed
ENSMUSG00000042129.8	Rassf4	chr6	116671952	116675952	K4me3 K4me1 K27ac
ENSMUSG00000042258.13	Isl1	chr13	116307685	116311685	Bivalent
ENSMUSG00000042340.6	Ctf1	chr7	127710943	127714943	K4me3 K4me1 K27ac
ENSMUSG00000042377.8	Fam83g	chr11	61682418	61686418	K4me3 K4me1 K27ac
ENSMUSG00000042429.8	Adora1	chr1	134233397	134237397	Bivalent
ENSMUSG00000042460.5	C1galt1	chr6	7842841	7846841	K4me3 K27ac
ENSMUSG00000042514.11	Klhl14	chr18	21652718	21656718	Bivalent
ENSMUSG00000042529.14	Kcnj12	chr11	61063803	61067803	Unmarked
ENSMUSG00000042589.18	Cux2	chr5	121864063	121868063	K4me1
ENSMUSG00000042632.17	Pla2g6	chr15	79322488	79326488	K4me1 K27ac
ENSMUSG00000042655.5	Shisal2b	chr13	104861312	104865312	K4me3 K4me1
ENSMUSG00000043088.16	Il17re	chr6	113456833	113460833	K4me1
ENSMUSG00000043091.9	Tuba1c	chr15	99027890	99031890	K4me3 K4me1 K27ac
ENSMUSG00000043168.12	4930426D05Rik	chr18	21649447	21653447	Bivalent
ENSMUSG00000043300.2	B3galnt1	chr3	69596960	69600960	K4me3 K4me1
ENSMUSG00000043621.13	Ubxn10	chr4	138722856	138726856	K4me3 K4me1 K27ac
ENSMUSG00000043629.12	1700019D03Rik	chr1	52990656	52994656	Unmarked
ENSMUSG00000043664.7	Tmem221	chr8	71556871	71560871	Bivalent
ENSMUSG00000043719.14	Col6a6	chr9	105807648	105811648	K4me1
ENSMUSG00000043760.16	Pkhd1	chr1	20616040	20620040	K4me1 K27ac
ENSMUSG00000043964.14	Orai3	chr7	127767814	127771814	K4me3 K4me1 K27ac
ENSMUSG00000044017.16	Adgrd1	chr5	129094756	129098756	Unmarked
ENSMUSG00000044254.6	Pcsk9	chr4	106462329	106466329	Bivalent
ENSMUSG00000044345.9	Marveld1	chr19	42145399	42149399	Bivalent
ENSMUSG00000044365.15	Cxxc4	chr3	134238589	134242589	K4me3 K4me1 K27ac
ENSMUSG00000044433.16	Camsap3	chr8	3586050	3590050	K4me3 K27ac
ENSMUSG00000044453.5	Ffar1	chr7	30859564	30863564	K4me1 K27ac
ENSMUSG00000044461.6	Shisa2	chr14	59625188	59629188	K4me3 K27ac
ENSMUSG00000044499.11	Hs3st5	chr10	36504888	36508888	Bivalent
ENSMUSG00000044628.5	Rnf208	chr2	25240928	25244928	K4me3 K4me1 K27ac
ENSMUSG00000044629.5	Cnrip1	chr11	17049817	17053817	Bivalent
ENSMUSG00000044726.8	Erich5	chr15	34451304	34455304	Unmarked
ENSMUSG00000044788.10	Fads6	chr11	115295663	115299663	K4me3 K27ac
ENSMUSG00000044912.11	Syt16	chr12	73995798	73999798	Repressed
ENSMUSG00000044933.3	Sstr3	chr15	78542685	78546685	K4me3 K4me1 K27ac
ENSMUSG00000044937.15	Ttc41	chr10	86751431	86755431	Unmarked
ENSMUSG00000044988.7	Ucn3	chr13	3943349	3947349	K4me1
ENSMUSG00000045009.9	Prrt3	chr6	113499818	113503818	Bivalent
ENSMUSG00000045034.12	Ankrd34b	chr13	92424340	92428340	Bivalent
ENSMUSG00000045053.2	Kcng3	chr17	83629895	83633895	Bivalent
ENSMUSG00000045165.6	AI467606	chr7	127089423	127093423	K4me3 K4me1 K27ac
ENSMUSG00000045288.10	Ush1g	chr11	115320041	115324041	Bivalent
ENSMUSG00000045348.16	Nyap1	chr5	137737718	137741718	K4me3 K27ac
ENSMUSG00000045394.9	Epcam	chr17	87633994	87637994	K4me3 K27ac
ENSMUSG00000045589.7	Frrs1l	chr4	56988391	56992391	Bivalent
ENSMUSG00000045691.14	Thtpa	chr14	55092783	55096783	K4me3 K4me1 K27ac
ENSMUSG00000045761.16	Togaram2	chr17	71711271	71715271	Unmarked
ENSMUSG00000046178.3	Nxph1	chr6	8946613	8950613	Bivalent
ENSMUSG00000046329.14	Slc25a23	chr17	57057863	57061863	K4me3 K4me1 K27ac
ENSMUSG00000046447.3	Camk2n1	chr4	138452313	138456313	K4me3 K27ac
ENSMUSG00000046580.10	Gm7862	chr12	76150627	76154627	Repressed
ENSMUSG00000046593.3	Tmem215	chr4	40471129	40475129	Bivalent
ENSMUSG00000046719.7	Nxph3	chr11	95512570	95516570	Bivalent
ENSMUSG00000046731.5	Kctd11	chr11	69878985	69882985	K4me3 K4me1 K27ac
ENSMUSG00000046761.13	Fam83h	chr15	76007498	76011498	K4me3 K4me1 K27ac
ENSMUSG00000046794.9	Ppp1r3b	chr8	35374659	35378659	K4me3 K4me1
ENSMUSG00000046982.11	Tshz1	chr18	84083075	84087075	K4me3 K27ac
ENSMUSG00000047040.9	Prr15l	chr11	96927301	96931301	K4me3 K4me1 K27ac
ENSMUSG00000047181.12	Samd14	chr11	95007881	95011881	K4me3 K4me1 K27ac
ENSMUSG00000047193.16	Dync2h1	chr9	6954689	6958689	Unmarked
ENSMUSG00000047228.9	A2ml1	chr6	128574746	128578746	Unmarked
ENSMUSG00000047501.3	Cldn4	chr5	134944934	134948934	K4me3 K4me1 K27ac
ENSMUSG00000047507.12	Baiap3	chr17	25254281	25258281	K4me3 K4me1 K27ac
ENSMUSG00000047606.4	Ankrd34c	chr9	89736475	89740475	Repressed
ENSMUSG00000047638.15	Nr1h4	chr10	89504658	89508658	K4me1 K27ac
ENSMUSG00000047642.15	D930020B18Rik	chr10	121639700	121643700	Bivalent
ENSMUSG00000047787.8	Flrt1	chr19	7103729	7107729	K4me1 K27ac
ENSMUSG00000047953.7	Gp5	chr16	30308779	30312779	Bivalent
ENSMUSG00000048218.6	Amigo2	chr15	97245287	97249287	K4me3 K4me1 K27ac
ENSMUSG00000048385.9	Scrt1	chr15	76519902	76523902	Bivalent
ENSMUSG00000048497.11	Mmgt2	chr11	62646812	62650812	K4me3 K4me1 K27ac
ENSMUSG00000048502.14	Duxbl1	chr14	25978372	25982372	Unmarked
ENSMUSG00000048652.12	Samd13	chr3	146683592	146687592	K4me3 K4me1
ENSMUSG00000049112.9	Oxtr	chr6	112486394	112490394	Bivalent
ENSMUSG00000049164.7	Zfp518a	chr19	40892704	40896704	K4me3 K27ac
ENSMUSG00000049241.5	Hcar1	chr5	123878020	123882020	K4me1
ENSMUSG00000049555.10	Tmie	chr9	110874021	110878021	K4me1 K27ac
ENSMUSG00000049672.15	Zbtb14	chr17	69381839	69385839	K4me3 K27ac
ENSMUSG00000050357.9	Carmil2	chr8	105684273	105688273	Unmarked
ENSMUSG00000050473.5	Slc35d3	chr10	19849459	19853459	Bivalent
ENSMUSG00000050737.13	Ptges	chr2	30895469	30899469	K4me1
ENSMUSG00000050854.9	Tmem125	chr4	118540962	118544962	K4me3 K4me1 K27ac
ENSMUSG00000050908.12	Tvp23a	chr16	10445327	10449327	K4me3 K4me1
ENSMUSG00000050954.15	Zfp169	chr13	48511451	48515451	K4me3 K27ac
ENSMUSG00000051067.8	Lingo3	chr10	80842039	80846039	Bivalent
ENSMUSG00000051527.11	Usp29	chr7	6729199	6733199	K4me3 K27ac
ENSMUSG00000051590.10	Map3k19	chr1	127838321	127842321	K4me1
ENSMUSG00000051817.8	Sox12	chr2	152396046	152400046	K4me3 K27ac
ENSMUSG00000052117.5	D630039A03Rik	chr4	57914297	57918297	K4me3 K4me1 K27ac
ENSMUSG00000052271.7	Bhlha15	chr5	144188285	144192285	K4me3 K4me1 K27ac
ENSMUSG00000052331.14	Ankrd44	chr1	54722423	54726423	Unmarked
ENSMUSG00000052374.16	Actn2	chr13	12280547	12284547	Unmarked
ENSMUSG00000052512.17	Nav2	chr7	48906715	48910715	K4me1
ENSMUSG00000052595.8	A1cf	chr19	31866772	31870772	K4me3 K4me1 K27ac
ENSMUSG00000052613.16	Pcdh15	chr10	73819882	73823882	Unmarked
ENSMUSG00000052889.11	Prkcb	chr7	122287296	122291296	K4me3 K4me1
ENSMUSG00000052951.5	C130021I20Rik	chr2	33639192	33643192	K4me3 K4me1 K27ac
ENSMUSG00000053025.13	Sv2b	chr7	75306379	75310379	Bivalent
ENSMUSG00000053141.16	Ptprt	chr2	162133451	162137451	Unmarked
ENSMUSG00000053182.11	Gm609	chr16	45452978	45456978	Bivalent
ENSMUSG00000053399.9	Adamts18	chr8	113843301	113847301	Unmarked
ENSMUSG00000053545.6	6430503K07Rik	chr2	147185423	147189423	K4me3 K4me1 K27ac
ENSMUSG00000053552.14	Ebf4	chr2	130293938	130297938	K4me3 K27ac
ENSMUSG00000053647.4	Gper1	chr5	139421279	139425279	K4me1
ENSMUSG00000054065.12	Pkp3	chr7	141087410	141091410	K4me1
ENSMUSG00000054256.11	Msi1	chr5	115432995	115436995	K4me3 K4me1 K27ac
ENSMUSG00000054277.8	Arfgap3	chr15	83304971	83308971	K4me1 K27ac
ENSMUSG00000054320.16	Lrrc36	chr8	105411570	105415570	Bivalent
ENSMUSG00000054408.9	Spcs3	chr8	54527998	54531998	K4me3 K27ac
ENSMUSG00000054457.5	9430021M05Rik	chr2	162659162	162663162	Bivalent
ENSMUSG00000054459.8	Vsnl1	chr12	11433640	11437640	Bivalent
ENSMUSG00000054598.13	9130230L23Rik	chr5	65999791	66003791	K4me1
ENSMUSG00000054662.8	Ano9	chr7	141115806	141119806	K4me3 K4me1 K27ac
ENSMUSG00000054728.17	Phactr1	chr13	42678798	42682798	K4me1
ENSMUSG00000055053.18	Nfic	chr10	81398554	81402554	K4me1 K27ac
ENSMUSG00000055197.4	Fev	chr1	74883419	74887419	Bivalent
ENSMUSG00000055202.11	Zfp811	chr17	32807931	32811931	K4me3 K4me1
ENSMUSG00000055745.4	Rtl6	chr15	84555823	84559823	K4me1
ENSMUSG00000055897.13	Ppp4r1l-ps	chr2	173657368	173661368	K4me3 K27ac
ENSMUSG00000056050.13	Mia3	chr1	183367553	183371553	K4me3 K4me1 K27ac
ENSMUSG00000056306.5	Sertm1	chr3	54913887	54917887	Bivalent
ENSMUSG00000056569.11	Mpz	chr1	171148710	171152710	K4me3 K27ac
ENSMUSG00000056812.14	St8sia3	chr18	64262618	64266618	K4me3 K27ac
ENSMUSG00000056895.4	H2bu2	chr11	58946919	58950919	K4me3 K27ac
ENSMUSG00000057069.7	Ero1lb	chr13	12563873	12567873	K4me3 K27ac
ENSMUSG00000057092.12	Fxyd3	chr7	31074655	31078655	K4me3 K4me1 K27ac
ENSMUSG00000057132.16	Rpgrip1	chr14	52119108	52123108	K4me3 K4me1 K27ac
ENSMUSG00000057182.15	Scn3a	chr2	65565492	65569492	K4me1
ENSMUSG00000057246.16	BC051142	chr17	34396819	34400819	Repressed
ENSMUSG00000057530.14	Ece1	chr4	137860236	137864236	K4me3 K4me1 K27ac
ENSMUSG00000057897.14	Camk2b	chr11	6063545	6067545	Bivalent
ENSMUSG00000058135.12	Gstm1	chr3	108014600	108018600	K4me3 K27ac
ENSMUSG00000058153.15	Sez6l	chr5	112575177	112579177	Bivalent
ENSMUSG00000058159.14	T2	chr17	8394628	8398628	Unmarked
ENSMUSG00000058297.16	Spock2	chr10	60104218	60108218	K4me3 K4me1 K27ac
ENSMUSG00000058441.7	Panx2	chr15	89067672	89071672	Bivalent
ENSMUSG00000058488.7	Kl	chr5	150950606	150954606	Bivalent
ENSMUSG00000058586.12	Serhl	chr15	83095070	83099070	Repressed
ENSMUSG00000058638.14	Zfp110	chr7	12832760	12836760	Bivalent
ENSMUSG00000058881.13	Zfp516	chr18	82908926	82912926	K4me3 K4me1 K27ac
ENSMUSG00000059555.6	Tor4a	chr2	25194759	25198759	K4me3 K4me1 K27ac
ENSMUSG00000059824.12	Dbp	chr7	45703283	45707283	K4me3 K4me1 K27ac
ENSMUSG00000059854.8	Hydin	chr8	110264990	110268990	K4me3 K4me1
ENSMUSG00000059921.15	Unc5c	chr3	141463573	141467573	Bivalent
ENSMUSG00000060224.4	Pyroxd2	chr19	42750775	42754775	K4me3 K4me1 K27ac
ENSMUSG00000060314.13	Zfp941	chr7	140820146	140824146	Repressed
ENSMUSG00000060969.9	Irx1	chr13	71958716	71962716	Bivalent
ENSMUSG00000061126.5	Cyp4f39	chr17	32450751	32454751	K4me1 K27ac
ENSMUSG00000061175.12	Fnip2	chr3	79565682	79569682	K4me3 K27ac
ENSMUSG00000061232.16	H2-K1	chr17	33998283	34002283	Unmarked
ENSMUSG00000061306.16	Slc38a10	chr11	120149312	120153312	K4me3 K4me1 K27ac
ENSMUSG00000061414.8	Cracr2a	chr6	127575896	127579896	K4me1
ENSMUSG00000062031.13	Pgghg	chr7	140939390	140943390	K4me1
ENSMUSG00000062044.16	Lmtk3	chr7	45781946	45785946	K4me3 K4me1 K27ac
ENSMUSG00000062157.6	Ifnlr1	chr4	135684286	135688286	K4me3 K4me1
ENSMUSG00000062563.15	Cys1	chr12	24679795	24683795	K4me3 K27ac
ENSMUSG00000062760.10	Shisal1	chr15	84445097	84449097	Repressed
ENSMUSG00000062785.14	Kcnc3	chr7	44588663	44592663	Bivalent
ENSMUSG00000062859.15	Tcp11	chr17	28078523	28082523	K4me3 K27ac
ENSMUSG00000063011.7	Msln	chr17	25752314	25756314	K4me1
ENSMUSG00000063077.15	Kif1b	chr4	149305623	149309623	K4me3 K4me1 K27ac
ENSMUSG00000063558.4	Aox1	chr1	58027930	58031930	K4me1
ENSMUSG00000063652.10	Slc22a21	chr11	53951146	53955146	Unmarked
ENSMUSG00000063681.14	Crb1	chr1	139375100	139379100	K4me1
ENSMUSG00000063895.7	Nupl1	chr14	60249431	60253431	K4me3 K27ac
ENSMUSG00000063919.11	Srrm4	chr5	116475068	116479068	Unmarked
ENSMUSG00000064125.14	Prr36	chr8	4215312	4219312	K4me3 K4me1 K27ac
ENSMUSG00000066800.11	Rnasel	chr1	153749951	153753951	K4me1
ENSMUSG00000067028.11	Cntnap5b	chr1	99770764	99774764	K4me3 K4me1
ENSMUSG00000067219.9	Nipal1	chr5	72645841	72649841	K4me1 K27ac
ENSMUSG00000067242.11	Lgi1	chr19	38262576	38266576	Repressed
ENSMUSG00000067578.3	Cbln4	chr2	172041466	172045466	Bivalent
ENSMUSG00000067629.13	Syngap1	chr17	26939252	26943252	K4me3 K4me1 K27ac
ENSMUSG00000067786.16	Nnat	chr2	157558123	157562123	K4me3 K4me1
ENSMUSG00000067889.6	Sptbn2	chr19	4709166	4713166	K4me3 K4me1
ENSMUSG00000068263.11	Efcc1	chr6	87730808	87734808	Bivalent
ENSMUSG00000068551.12	Zfp467	chr6	48443464	48447464	K4me3 K4me1 K27ac
ENSMUSG00000068615.4	Gjd2	chr2	114011619	114015619	K4me3 K4me1 K27ac
ENSMUSG00000068686.12	Cd59b	chr2	104067848	104071848	Unmarked
ENSMUSG00000068735.14	Trp53i11	chr2	93187190	93191190	K4me3 K4me1 K27ac
ENSMUSG00000069008.3	Gm5537	chr3	58102247	58106247	Unmarked
ENSMUSG00000069805.10	Fbp1	chr13	62870758	62874758	K4me1
ENSMUSG00000069920.10	B3gnt9	chr8	105253151	105257151	Repressed
ENSMUSG00000070315.12	4930581F22Rik	chr9	35116194	35120194	K4me3 K27ac
ENSMUSG00000070348.5	Ccnd1	chr7	144936197	144940197	K4me3 K4me1
ENSMUSG00000070473.4	Cldn3	chr5	134984213	134988213	K4me3 K4me1 K27ac
ENSMUSG00000070498.3	Tmem132b	chr5	125529773	125533773	Bivalent
ENSMUSG00000070577.5	Gm572	chr4	148641316	148645316	K4me3 K4me1 K27ac
ENSMUSG00000070661.6	Rnf186	chr4	138965111	138969111	K4me3 K4me1 K27ac
ENSMUSG00000070737.10	Tmem35b	chr4	127121690	127125690	Unmarked
ENSMUSG00000070780.11	Rbm47	chr5	66079990	66083990	K4me1 K27ac
ENSMUSG00000070802.5	Pnmal2	chr7	16942681	16946681	K4me3 K27ac
ENSMUSG00000071005.7	Ccl19	chr4	42754489	42758489	Unmarked
ENSMUSG00000071265.10	1700086L19Rik	chr12	74282288	74286288	K4me3 K4me1 K27ac
ENSMUSG00000071531.3	Gprin2	chr14	34199633	34203633	K4me3 K4me1
ENSMUSG00000071547.4	Nt5dc2	chr14	31129052	31133052	K4me3 K4me1 K27ac
ENSMUSG00000071648.4	Rom1	chr19	8927356	8931356	K4me3 K27ac
ENSMUSG00000072115.11	Ang	chr14	51093999	51097999	K4me1 K27ac
ENSMUSG00000072675.12	Duxbl2	chr14	26118144	26122144	Unmarked
ENSMUSG00000073000.3	Gm10451	chr12	76447697	76451697	Unmarked
ENSMUSG00000073096.11	Lrrc61	chr6	48552795	48556795	K4me3 K4me1 K27ac
ENSMUSG00000073197.9	5730507C01Rik	chr12	18512509	18516509	Bivalent
ENSMUSG00000073530.11	Pappa2	chr1	158958381	158962381	K4me1
ENSMUSG00000073684.13	Faap20	chr4	155248695	155252695	K4me3 K4me1 K27ac
ENSMUSG00000073888.13	Ccl27a	chr4	41771601	41775601	Bivalent
ENSMUSG00000073889.10	Il11ra1	chr4	41765933	41769933	Unmarked
ENSMUSG00000074207.10	Adh1	chr3	138275493	138279493	K4me1
ENSMUSG00000074272.10	Ceacam1	chr7	25474704	25478704	Unmarked
ENSMUSG00000074277.4	Phldb3	chr7	24608762	24612762	Bivalent
ENSMUSG00000074345.4	Tnfaip8l3	chr9	54066388	54070388	Bivalent
ENSMUSG00000074582.10	Arfgef2	chr2	166803587	166807587	K4me3 K27ac
ENSMUSG00000074671.6	Tspyl3	chr2	153223441	153227441	K4me1 K27ac
ENSMUSG00000074715.3	Ccl28	chr13	119621818	119625818	Unmarked
ENSMUSG00000074892.9	B3galt5	chr16	96271473	96275473	K4me1 K27ac
ENSMUSG00000074981.13	Dcdc5	chr2	106001335	106005335	K4me3 K27ac
ENSMUSG00000075420.6	Smim6	chr11	115910016	115914016	K4me1 K27ac
ENSMUSG00000075569.10	Rsph10b	chr5	143979151	143983151	K4me1
ENSMUSG00000075592.10	Nynrin	chr14	55852035	55856035	K4me3 K4me1 K27ac
ENSMUSG00000078350.11	Smim1	chr4	154023616	154027616	K4me3 K4me1 K27ac
ENSMUSG00000078588.10	Ccdc24	chr4	117870520	117874520	K4me1
ENSMUSG00000078671.11	Chd2	chr7	73539830	73543830	K4me3 K27ac
ENSMUSG00000078747.9	Gm20878	chr4	41939571	41943571	Unmarked
ENSMUSG00000078880.10	Gm14308	chr2	176634343	176638343	Unmarked
ENSMUSG00000078945.10	Naip2	chr13	100200092	100204092	Unmarked
ENSMUSG00000079056.12	Kcnip3	chr2	127520094	127524094	K4me3 K4me1 K27ac
ENSMUSG00000079071.2	Slc28a2b	chr2	122482940	122486940	Unmarked
ENSMUSG00000079262.3	Slco1a6	chr6	142206521	142210521	Unmarked
ENSMUSG00000079434.8	Neu2	chr1	87592549	87596549	Unmarked
ENSMUSG00000079497.4	Gm13420	chr2	29749685	29753685	K4me3 K4me1 K27ac
ENSMUSG00000079620.13	Muc4	chr16	32775536	32779536	Unmarked
ENSMUSG00000080115.3	Eef1akmt3	chr10	127039513	127043513	Bivalent
ENSMUSG00000081219.1	Bambi-ps1	chr2	122465526	122469526	K4me3 K4me1
ENSMUSG00000081303.2	Gm16011	chr16	45427506	45431506	Unmarked
ENSMUSG00000084839.1	Gm14097	chr2	132696523	132700523	K4me1 K27ac
ENSMUSG00000084866.2	A930006K02Rik	chr16	91463024	91467024	K4me3 K27ac
ENSMUSG00000084902.2	Gm281	chr14	13912478	13916478	K4me1
ENSMUSG00000084983.7	Gm11789	chr11	120529784	120533784	K4me3 K4me1 K27ac
ENSMUSG00000085158.1	Gm14264	chr2	170660465	170664465	Unmarked
ENSMUSG00000085322.2	Gm14261	chr2	168764142	168768142	K4me3 K27ac
ENSMUSG00000085636.1	Gm11769	chr11	120148561	120152561	K4me3 K4me1 K27ac
ENSMUSG00000085833.2	Gm13003	chr4	137163066	137167066	K4me1
ENSMUSG00000085912.2	Trp53cor1	chr17	29077179	29081179	K4me3 K4me1 K27ac
ENSMUSG00000085929.1	Gm13421	chr2	27538425	27542425	K4me3 K27ac
ENSMUSG00000086022.1	Rad51ap2	chr12	11454078	11458078	Bivalent
ENSMUSG00000086171.7	Pcsk2os1	chr2	143543977	143547977	Bivalent
ENSMUSG00000086587.7	Gm11837	chr4	14927907	14931907	Repressed
ENSMUSG00000087077.1	Gm12480	chr4	54649902	54653902	Unmarked
ENSMUSG00000087094.1	Gm13093	chr4	150117263	150121263	K4me3 K4me1 K27ac
ENSMUSG00000087141.1	Plcxd2	chr16	46008218	46012218	K4me3 K27ac
ENSMUSG00000087259.7	2610035D17Rik	chr11	113171077	113175077	K4me1
ENSMUSG00000087355.7	Gm13187	chr2	4299112	4303112	Bivalent
ENSMUSG00000089663.1	Gm15651	chr16	22546552	22550552	K4me1
ENSMUSG00000089682.10	Bcl2l2	chr14	54881503	54885503	K4me3 K4me1 K27ac
ENSMUSG00000090035.3	Galnt4	chr10	99106158	99110158	K4me3 K27ac
ENSMUSG00000090799.2	Klhl33	chr14	50895479	50899479	Bivalent
ENSMUSG00000091472.2	Gm3739	chr14	7313049	7317049	Unmarked
ENSMUSG00000091586.2	Cyp4f17	chr17	32504049	32508049	K4me3 K4me1 K27ac
ENSMUSG00000091735.2	Gpr62	chr9	106463938	106467938	K4me3 K4me1
ENSMUSG00000091898.8	Tnnc1	chr14	31206329	31210329	K4me3 K27ac
ENSMUSG00000092130.2	D030025P21Rik	chr12	84873768	84877768	Bivalent
ENSMUSG00000092192.7	Dnaaf4	chr9	72956784	72960784	K4me3 K4me1 K27ac
ENSMUSG00000092274.3	Neat1	chr19	5843259	5847259	K4me3 K4me1 K27ac
ENSMUSG00000092286.1	Dtnbos	chr12	3760146	3764146	K4me1 K27ac
ENSMUSG00000092500.1	Gm20400	chr6	142159492	142163492	Unmarked
ENSMUSG00000092570.7	Plut	chr5	147268995	147272995	K4me3 K27ac
ENSMUSG00000094282.1	Cfap73	chr5	120632235	120636235	K4me3 K4me1 K27ac
ENSMUSG00000094472.1	Gm21897	chr16	15315457	15319457	Unmarked
ENSMUSG00000094504.3	Gm5294	chr5	138818079	138822079	Bivalent
ENSMUSG00000094893.2	Gm4791	chr9	46996740	47000740	K4me1 K27ac
ENSMUSG00000095105.2	Edaradd	chr13	12518438	12522438	Repressed
ENSMUSG00000096107.2	Gm16505	chr13	3356272	3360272	Bivalent
ENSMUSG00000096146.2	Kcnj11	chr7	46098658	46102658	K4me3 K4me1 K27ac
ENSMUSG00000096215.8	Smim22	chr16	5005336	5009336	K4me3 K4me1 K27ac
ENSMUSG00000096847.2	Tmem151b	chr17	45547677	45551677	K4me3 K27ac
ENSMUSG00000096929.7	A330023F24Rik	chr1	194974374	194978374	K4me3 K27ac
ENSMUSG00000096935.5	1700113A16Rik	chr3	88175785	88179785	K4me3 K27ac
ENSMUSG00000096956.2	Snhg18	chr15	32242662	32246662	K4me3 K27ac
ENSMUSG00000097101.3	1810034E14Rik	chr13	64246699	64250699	K4me3 K4me1 K27ac
ENSMUSG00000097184.2	4632428C04Rik	chr16	30006666	30010666	K4me3 K4me1 K27ac
ENSMUSG00000097203.2	4732419C18Rik	chr8	123752726	123756726	K4me1
ENSMUSG00000097328.7	Tnfsf12	chr11	69693849	69697849	K4me3 K4me1 K27ac
ENSMUSG00000097467.2	Gm26737	chr9	44116121	44120121	Unmarked
ENSMUSG00000097619.8	4833422M21Rik	chr15	96252616	96256616	Unmarked
ENSMUSG00000097666.2	A330094K24Rik	chr18	77730739	77734739	K4me3 K4me1 K27ac
ENSMUSG00000097899.2	Gm16894	chr1	40083851	40087851	K4me3 K4me1
ENSMUSG00000097908.7	4933404O12Rik	chr5	136917351	136921351	Bivalent
ENSMUSG00000099032.2	Tcf24	chr1	9965932	9969932	K4me3 K27ac
ENSMUSG00000099413.1	Gm17767	chr1	51510329	51514329	K4me1 K27ac
ENSMUSG00000099908.1	Gm28539	chr16	18834583	18838583	K4me3 K27ac
ENSMUSG00000100009.6	Gm7967	chr1	98587517	98591517	Unmarked
ENSMUSG00000100094.1	1810008I18Rik	chr7	65801110	65805110	K4me1 K27ac
ENSMUSG00000100490.1	Gm28455	chr7	39487437	39491437	Unmarked
ENSMUSG00000100572.1	2410021H03Rik	chr17	69275208	69279208	Unmarked
ENSMUSG00000100707.1	Gm28523	chr6	141248009	141252009	Bivalent
ENSMUSG00000102059.1	Gm20257	chr1	58650640	58654640	K4me3 K4me1
ENSMUSG00000103182.1	Gm37091	chr1	39081338	39085338	Unmarked
ENSMUSG00000103965.1	Gm30173	chr3	52514963	52518963	Unmarked
ENSMUSG00000104283.1	Gm37459	chr3	32972675	32976675	Unmarked
ENSMUSG00000104301.3	Wdr49	chr3	75480156	75484156	K4me1
ENSMUSG00000106139.1	Gm30648	chr3	134198085	134202085	K4me3 K4me1 K27ac
ENSMUSG00000106164.1	9430085M18Rik	chr5	101701585	101705585	K4me1
ENSMUSG00000106714.1	Gm42546	chr5	117297888	117301888	Unmarked
ENSMUSG00000106847.1	Peg13	chr15	72808324	72812324	Bivalent
ENSMUSG00000107008.3	Gm2762	chr13	53392290	53396290	K4me1
ENSMUSG00000107191.1	Gm43579	chr5	120625621	120629621	K4me1
ENSMUSG00000107317.1	Gm19719	chr5	149285868	149289868	K4me3 K4me1
ENSMUSG00000107881.1	Gm44250	chr6	5218486	5222486	Unmarked
ENSMUSG00000109715.1	Gm45606	chr11	75531071	75535071	K4me3 K4me1 K27ac
ENSMUSG00000109814.1	Gm45847	chr7	123029414	123033414	K4me3 K4me1 K27ac
ENSMUSG00000110027.1	C030029H02Rik	chr7	136266331	136270331	Unmarked
ENSMUSG00000110086.1	Gm45623	chr13	56751827	56755827	Bivalent
ENSMUSG00000110146.1	Gm45487	chr7	46110081	46114081	K4me1 K27ac
ENSMUSG00000110230.1	Gm45846	chr7	123029373	123033373	K4me3 K4me1 K27ac
ENSMUSG00000110724.1	Gm47824	chr9	77899528	77903528	K4me1
ENSMUSG00000110803.1	Gm20275	chr9	59939077	59943077	K4me3 K4me1 K27ac
ENSMUSG00000111303.1	4930502A04Rik	chr9	68518200	68522200	Unmarked
ENSMUSG00000111977.1	Gm47163	chr10	79635855	79639855	K4me3 K4me1 K27ac
ENSMUSG00000112470.1	5330439M10Rik	chr10	118110516	118114516	K4me1
ENSMUSG00000112803.1	Gm36543	chr10	25705943	25709943	K4me3 K4me1 K27ac
ENSMUSG00000113571.1	Gm48137	chr12	35138891	35142891	Unmarked
ENSMUSG00000114493.2	Gm47071	chr13	55824249	55828249	Bivalent
ENSMUSG00000115767.1	Gm10366	chr14	54462742	54466742	K4me3 K27ac
ENSMUSG00000115801.1	AC160336.1	chr14	44635201	44639201	Unmarked
ENSMUSG00000115867.1	Gm17753	chr15	79021529	79025529	K4me1
ENSMUSG00000116581.1	Gm46565	chr16	30933629	30937629	K4me3 K4me1 K27ac
ENSMUSG00000116652.2	B830017H08Rik	chr16	17831567	17835567	Bivalent
ENSMUSG00000117592.1	Gm46603	chr17	29320549	29324549	K4me3 K4me1 K27ac
ENSMUSG00000117916.1	9630028I04Rik	chr17	27246066	27250066	Unmarked
ENSMUSG00000118119.1	Gm9937	chr17	30873284	30877284	Unmarked
ENSMUSG00000118256.1	Gm50303	chr18	82412364	82416364	Unmarked
ENSMUSG00000118356.1	Gm50353	chr18	64698054	64702054	K4me1 K27ac
ENSMUSG00000118366.1	9130016M20Rik	chr19	31948083	31952083	Unmarked

## Sheet: Upregulated Ngn_H
geneID	geneSymbol	Chr	Start	End	Chromatin State
ENSMUSG00000000031.16	H19	chr7	142575386	142579386	K4me1 K27ac
ENSMUSG00000000088.7	Cox5a	chr9	57519278	57523278	K4me3 K27ac
ENSMUSG00000000301.16	Pemt	chr11	60044485	60048485	Unmarked
ENSMUSG00000000489.7	Pdgfb	chr15	80012977	80016977	K4me3 K4me1
ENSMUSG00000000530.16	Acvrl1	chr15	101126923	101130923	Bivalent
ENSMUSG00000000531.5	Grasp	chr15	101222187	101226187	K4me3 K4me1 K27ac
ENSMUSG00000000753.15	Serpinf1	chr11	75413195	75417195	Unmarked
ENSMUSG00000000884.17	Gnb1l	chr16	18496901	18500901	K4me3 K4me1 K27ac
ENSMUSG00000000889.8	Dbh	chr2	27163232	27167232	K4me1
ENSMUSG00000001020.8	S100a4	chr3	90601770	90605770	Unmarked
ENSMUSG00000001025.8	S100a6	chr3	90611153	90615153	K4me1
ENSMUSG00000001029.15	Icam2	chr11	106386075	106390075	Unmarked
ENSMUSG00000001056.3	Nhp2	chr11	51617734	51621734	Bivalent
ENSMUSG00000001119.7	Col6a1	chr10	76717236	76721236	Unmarked
ENSMUSG00000001270.9	Ckb	chr12	111670283	111674283	K4me3 K4me1
ENSMUSG00000001313.12	Rnd2	chr11	101462998	101466998	K4me3 K4me1 K27ac
ENSMUSG00000001435.15	Col18a1	chr10	77057997	77061997	Unmarked
ENSMUSG00000001864.13	Aif1l	chr2	31948333	31952333	K4me3 K4me1
ENSMUSG00000002274.13	Metrn	chr17	25794081	25798081	K4me3 K4me1
ENSMUSG00000002308.16	Cd320	chr17	33841090	33845090	K4me3 K27ac
ENSMUSG00000002379.7	Ndufa11	chr17	56715797	56719797	K4me3 K27ac
ENSMUSG00000002489.16	Tiam1	chr16	89972699	89976699	K4me1 K27ac
ENSMUSG00000002808.7	Epdr1	chr13	19617788	19621788	K4me3 K4me1
ENSMUSG00000002885.14	Adgre5	chr8	83726304	83730304	Unmarked
ENSMUSG00000002900.16	Lamb1	chr12	31263296	31267296	K4me3 K4me1 K27ac
ENSMUSG00000003072.15	Atp5d	chr10	80136631	80140631	K4me3 K4me1 K27ac
ENSMUSG00000004105.8	Angptl2	chr2	33214097	33218097	K4me3 K4me1 K27ac
ENSMUSG00000004665.10	Cnn2	chr10	79986622	79990622	K4me3 K4me1
ENSMUSG00000004698.11	Hdac9	chr12	34526304	34530304	K4me1
ENSMUSG00000004892.13	Bcan	chr3	87995265	87999265	Bivalent
ENSMUSG00000005089.15	Slc1a2	chr2	102704437	102708437	Unmarked
ENSMUSG00000005540.10	Fcer2a	chr8	3692175	3696175	Unmarked
ENSMUSG00000005674.9	Tomm40l	chr1	171220514	171224514	K4me3 K27ac
ENSMUSG00000005681.12	Apoa2	chr1	171223090	171227090	K4me1
ENSMUSG00000006378.15	Gcat	chr15	79031497	79035497	Unmarked
ENSMUSG00000006445.3	Epha2	chr4	141314912	141318912	Unmarked
ENSMUSG00000006476.19	Nsmf	chr2	25052402	25056402	K4me3 K4me1 K27ac
ENSMUSG00000006576.16	Slc4a3	chr1	75544295	75548295	K4me3 K27ac
ENSMUSG00000007480.4	Mc5r	chr18	68335595	68339595	K4me1
ENSMUSG00000008398.15	Elk3	chr10	93308811	93312811	K4me3 K4me1
ENSMUSG00000009013.5	Dynll1	chr5	115298663	115302663	K4me3 K27ac
ENSMUSG00000009687.14	Fxyd5	chr7	31039839	31043839	Bivalent
ENSMUSG00000010492.10	Uckl1os	chr2	181576517	181580517	K4me1 K27ac
ENSMUSG00000012428.9	Steap4	chr5	7958456	7962456	Unmarked
ENSMUSG00000013083.8	2200002J24Rik	chr7	30697782	30701782	K4me1 K27ac
ENSMUSG00000014226.10	Cacybp	chr1	160210726	160214726	K4me3 K27ac
ENSMUSG00000014313.15	Cox6c	chr15	35935645	35939645	K4me3 K27ac
ENSMUSG00000014361.5	Mertk	chr2	128769312	128773312	Unmarked
ENSMUSG00000015806.12	Qdpr	chr5	45448176	45452176	K4me3 K4me1 K27ac
ENSMUSG00000016024.9	Lbp	chr2	158304492	158308492	K4me1 K27ac
ENSMUSG00000016194.14	Hsd11b1	chr1	193262075	193266075	Unmarked
ENSMUSG00000016262.14	Sertad4	chr1	192853756	192857756	K4me3 K27ac
ENSMUSG00000016494.9	Cd34	chr1	194936874	194940874	Bivalent
ENSMUSG00000017165.1	Gast	chr11	100332406	100336406	K4me1
ENSMUSG00000017204.4	Gsdma	chr11	98662350	98666350	Unmarked
ENSMUSG00000017309.11	Cd300lg	chr11	102039508	102043508	K4me1
ENSMUSG00000018411.17	Mapt	chr11	104229583	104233583	Bivalent
ENSMUSG00000018770.9	Atp5g3	chr2	73909291	73913291	K4me3 K27ac
ENSMUSG00000018774.13	Cd68	chr11	69664062	69668062	Unmarked
ENSMUSG00000019139.10	Isyna1	chr8	70593966	70597966	K4me3 K4me1 K27ac
ENSMUSG00000019278.5	Dpep1	chr8	123191950	123195950	K4me1
ENSMUSG00000019494.14	Cops6	chr5	138159070	138163070	K4me3 K27ac
ENSMUSG00000019762.4	Iyd	chr10	3538287	3542287	Unmarked
ENSMUSG00000019772.5	Vip	chr10	5637217	5641217	Unmarked
ENSMUSG00000019831.14	Wasf1	chr10	40881474	40885474	K4me3 K27ac
ENSMUSG00000019846.11	Lama4	chr10	39051804	39055804	Unmarked
ENSMUSG00000019997.11	Ccn2	chr10	24593779	24597779	K4me3 K4me1
ENSMUSG00000020037.15	Rfx4	chr10	84836147	84840147	Unmarked
ENSMUSG00000020052.9	Ascl1	chr10	87491660	87495660	Bivalent
ENSMUSG00000020053.18	Igf1	chr10	87859328	87863328	Bivalent
ENSMUSG00000020083.13	Fam241b	chr10	62132706	62136706	K4me3 K4me1 K27ac
ENSMUSG00000020143.15	Dock2	chr11	34781892	34785892	Unmarked
ENSMUSG00000020155.2	Kcnmb1	chr11	33961012	33965012	K4me1 K27ac
ENSMUSG00000020163.12	Uqcr11	chr10	80404830	80408830	K4me3 K4me1 K27ac
ENSMUSG00000020169.4	Best3	chr10	116984313	116988313	K4me3 K4me1 K27ac
ENSMUSG00000020218.11	Wif1	chr10	121081754	121085754	Unmarked
ENSMUSG00000020241.13	Col6a2	chr10	76621325	76625325	Repressed
ENSMUSG00000020396.8	Nefh	chr11	4946064	4950064	Bivalent
ENSMUSG00000020623.11	Map2k6	chr11	110397258	110401258	K4me3 K4me1
ENSMUSG00000020650.15	Bcap29	chr12	31599749	31603749	Unmarked
ENSMUSG00000020684.14	Rasl10b	chr11	83407136	83411136	K4me3 K4me1
ENSMUSG00000020695.14	Mrc2	chr11	105290667	105294667	Bivalent
ENSMUSG00000020717.19	Pecam1	chr11	106748628	106752628	Unmarked
ENSMUSG00000020810.5	Cygb	chr11	116652313	116656313	Bivalent
ENSMUSG00000020843.15	Timm22	chr11	76404951	76408951	K4me3 K27ac
ENSMUSG00000021010.8	Npas3	chr12	53251045	53255045	Repressed
ENSMUSG00000021071.16	Trim9	chr12	70345332	70349332	K4me3 K27ac
ENSMUSG00000021136.13	Smoc1	chr12	81024827	81028827	K4me3 K4me1 K27ac
ENSMUSG00000021196.14	Pfkp	chr13	6596760	6600760	Unmarked
ENSMUSG00000021207.9	Akr1c21	chr13	4572074	4576074	Unmarked
ENSMUSG00000021301.9	Hecw1	chr13	14316957	14320957	Unmarked
ENSMUSG00000021418.15	Rpp40	chr13	35904328	35908328	K4me3 K4me1
ENSMUSG00000021460.17	Auh	chr13	52927652	52931652	K4me3 K27ac
ENSMUSG00000021496.12	Pcbd2	chr13	55725367	55729367	K4me3 K27ac
ENSMUSG00000021548.10	Ccnh	chr13	85187407	85191407	K4me3 K27ac
ENSMUSG00000021594.11	Srd5a1	chr13	69592829	69596829	Unmarked
ENSMUSG00000021596.16	Mctp1	chr13	76823206	76827206	Unmarked
ENSMUSG00000021613.9	Hapln1	chr13	89582510	89586510	K4me1
ENSMUSG00000021647.7	Cartpt	chr13	99899091	99903091	Bivalent
ENSMUSG00000021676.10	Iqgap2	chr13	95889995	95893995	K4me3 K27ac
ENSMUSG00000021700.10	Rab3c	chr13	110278150	110282150	K4me3 K4me1
ENSMUSG00000021710.11	Nln	chr13	104034567	104038567	K4me1
ENSMUSG00000021730.8	Hcn1	chr13	117600479	117604479	Bivalent
ENSMUSG00000021795.10	Sftpd	chr14	41183149	41187149	K4me1
ENSMUSG00000021806.4	Nid2	chr14	19803235	19807235	Unmarked
ENSMUSG00000021823.10	Vcl	chr14	21020002	21024002	Unmarked
ENSMUSG00000021850.14	ccdc198	chr14	49243397	49247397	K4me1
ENSMUSG00000021852.14	Slc35f4	chr14	49297273	49301273	K4me1
ENSMUSG00000022013.4	Dnajc15	chr14	77872926	77876926	K4me3 K4me1
ENSMUSG00000022018.7	Rgcc	chr14	79299645	79303645	Bivalent
ENSMUSG00000022103.10	Gfra2	chr14	70888119	70892119	Bivalent
ENSMUSG00000022220.14	Adcy4	chr14	55771089	55775089	Repressed
ENSMUSG00000022221.14	Ripk3	chr14	55786857	55790857	Bivalent
ENSMUSG00000022300.10	Dcaf13	chr15	39110864	39114864	K4me3 K27ac
ENSMUSG00000022370.13	Mrpl13	chr15	55555349	55559349	K4me3 K27ac
ENSMUSG00000022519.14	Srl	chr16	4521063	4525063	K4me3 K4me1 K27ac
ENSMUSG00000022548.14	Apod	chr16	31312808	31316808	K4me1 K27ac
ENSMUSG00000022551.8	Cyc1	chr15	76341566	76345566	K4me3 K27ac
ENSMUSG00000022790.14	Igsf11	chr16	38890670	38894670	Unmarked
ENSMUSG00000022824.12	Muc13	chr16	33792036	33796036	K4me1
ENSMUSG00000022971.18	Ifnar2	chr16	91370849	91374849	K4me3 K27ac
ENSMUSG00000023175.15	Bsg	chr10	79707597	79711597	K4me1 K27ac
ENSMUSG00000023353.14	Agap3	chr5	24477752	24481752	Unmarked
ENSMUSG00000023886.10	Smoc2	chr17	14277536	14281536	K4me3 K4me1
ENSMUSG00000023904.10	Hcfc1r1	chr17	23671595	23675595	K4me3 K4me1 K27ac
ENSMUSG00000023905.15	Tnfrsf12a	chr17	23675420	23679420	K4me3 K4me1 K27ac
ENSMUSG00000023914.16	Mep1a	chr17	43498482	43502482	Unmarked
ENSMUSG00000024008.16	Cpne5	chr17	29236167	29240167	Repressed
ENSMUSG00000024029.4	Tff3	chr17	31127646	31131646	K4me1 K27ac
ENSMUSG00000024067.14	Dpy30	chr17	74314463	74318463	K4me3 K27ac
ENSMUSG00000024451.9	Arap3	chr18	37996733	38000733	Bivalent
ENSMUSG00000024502.10	Jakmip2	chr18	43572245	43576245	Unmarked
ENSMUSG00000024503.3	Spink1	chr18	43735557	43739557	Unmarked
ENSMUSG00000024517.17	Grp	chr18	65871503	65875503	Bivalent
ENSMUSG00000024538.8	Ppic	chr18	53416115	53420115	K4me3 K4me1
ENSMUSG00000024552.16	Slc14a2	chr18	78594942	78598942	Unmarked
ENSMUSG00000024575.16	Pde6a	chr18	61218314	61222314	Unmarked
ENSMUSG00000024598.9	Fbn2	chr18	58207926	58211926	Bivalent
ENSMUSG00000024659.15	Anxa1	chr19	20388673	20392673	K4me1
ENSMUSG00000024664.5	Fads3	chr19	10054251	10058251	K4me1 K27ac
ENSMUSG00000024781.16	Lipa	chr19	34525411	34529411	K4me3 K4me1
ENSMUSG00000024827.10	Gldc	chr19	30173429	30177429	Bivalent
ENSMUSG00000025035.9	Arl3	chr19	46540813	46544813	K4me1
ENSMUSG00000025044.16	Msr1	chr8	39640671	39644671	Unmarked
ENSMUSG00000025068.8	Gsto1	chr19	47860994	47864994	Unmarked
ENSMUSG00000025069.15	Gsto2	chr19	47865640	47869640	K4me1
ENSMUSG00000025082.8	Vwa2	chr19	56872248	56876248	K4me3 K4me1
ENSMUSG00000025129.2	Ppp1r27	chr11	120549132	120553132	K4me3 K27ac
ENSMUSG00000025170.13	Rab40b	chr11	121386230	121390230	K4me3 K27ac
ENSMUSG00000025278.9	Flnb	chr14	7815956	7819956	K4me3 K27ac
ENSMUSG00000025393.12	Atp5b	chr10	128084229	128088229	Unmarked
ENSMUSG00000025492.6	Ifitm3	chr7	141008770	141012770	K4me3 K4me1
ENSMUSG00000025538.15	Sumf2	chr5	129844985	129848985	K4me3 K27ac
ENSMUSG00000025545.10	Clybl	chr14	122256040	122260040	Repressed
ENSMUSG00000025650.13	Col7a1	chr9	108952486	108956486	Bivalent
ENSMUSG00000025780.7	Itih5	chr2	10151570	10155570	K4me3 K4me1
ENSMUSG00000025875.14	Tspan17	chr13	54790870	54794870	K4me1
ENSMUSG00000026014.15	Raph1	chr1	60564779	60568779	K4me3 K27ac
ENSMUSG00000026162.7	Nhej1	chr1	75044639	75048639	K4me1
ENSMUSG00000026204.15	Ptprn	chr1	75262502	75266502	Bivalent
ENSMUSG00000026260.12	Ndufa10	chr1	92471767	92475767	K4me3 K4me1 K27ac
ENSMUSG00000026308.8	Klhl30	chr1	91349015	91353015	K4me1
ENSMUSG00000026399.12	Cd55	chr1	130460451	130464451	K4me3 K27ac
ENSMUSG00000026478.14	Lamc1	chr1	153237326	153241326	Unmarked
ENSMUSG00000026656.15	Fcgr2b	chr1	170974127	170978127	Unmarked
ENSMUSG00000026712.3	Mrc1	chr2	14326560	14330560	Unmarked
ENSMUSG00000026728.9	Vim	chr2	13577368	13581368	Unmarked
ENSMUSG00000026737.12	Pip4k2a	chr2	18864120	18868120	Unmarked
ENSMUSG00000026840.14	Lamc3	chr2	31923056	31927056	Unmarked
ENSMUSG00000026950.18	Neb	chr2	52174614	52178614	Unmarked
ENSMUSG00000027048.15	Abcb11	chr2	69340616	69344616	Unmarked
ENSMUSG00000027078.14	Ube2l6	chr2	84800702	84804702	Unmarked
ENSMUSG00000027195.10	Hsd17b12	chr2	94064469	94068469	K4me1
ENSMUSG00000027238.17	Frmd5	chr2	121549351	121553351	Unmarked
ENSMUSG00000027298.17	Tyro3	chr2	119799115	119803115	K4me3 K4me1 K27ac
ENSMUSG00000027316.15	Gfra4	chr2	131039457	131043457	Bivalent
ENSMUSG00000027322.11	Siglec1	chr2	131084765	131088765	Unmarked
ENSMUSG00000027406.13	Idh3b	chr2	130282415	130286415	K4me3 K27ac
ENSMUSG00000027474.13	Ccm2l	chr2	153063983	153067983	Repressed
ENSMUSG00000027533.10	Fabp5	chr3	10010547	10014547	K4me3 K4me1 K27ac
ENSMUSG00000027605.18	Acss2	chr2	155516056	155520056	K4me3 K4me1
ENSMUSG00000027610.17	Gss	chr2	155590567	155594567	K4me3 K4me1 K27ac
ENSMUSG00000027613.15	Eif6	chr2	155824663	155828663	K4me3 K4me1 K27ac
ENSMUSG00000027674.16	Pex5l	chr3	33081029	33085029	Unmarked
ENSMUSG00000027710.14	Acad9	chr3	36074768	36078768	Unmarked
ENSMUSG00000027714.11	Exosc9	chr3	36550605	36554605	K4me3 K27ac
ENSMUSG00000027894.14	Slc6a17	chr3	107498530	107502530	Bivalent
ENSMUSG00000027955.16	Gask1b	chr3	79884055	79888055	K4me3 K4me1
ENSMUSG00000027961.7	Lrrc39	chr3	116560972	116564972	Unmarked
ENSMUSG00000028020.16	Glrb	chr3	80855255	80859255	Unmarked
ENSMUSG00000028047.11	Thbs3	chr3	89222288	89226288	K4me1
ENSMUSG00000028048.11	Gba	chr3	89200939	89204939	Unmarked
ENSMUSG00000028085.12	Gatb	chr3	85572126	85576126	K4me3 K4me1
ENSMUSG00000028111.4	Ctsk	chr3	95497255	95501255	K4me1
ENSMUSG00000028125.14	Abca4	chr3	122072453	122076453	K4me1
ENSMUSG00000028172.5	Tacr3	chr3	134827006	134831006	K4me3 K4me1
ENSMUSG00000028364.15	Tnc	chr4	64018725	64022725	Unmarked
ENSMUSG00000028369.15	Svep1	chr4	58204688	58208688	Bivalent
ENSMUSG00000028488.15	Sh3gl2	chr4	85203468	85207468	K4me3 K27ac
ENSMUSG00000028584.3	Lrrc38	chr4	143347756	143351756	Bivalent
ENSMUSG00000028776.14	Tinagl1	chr4	130172820	130176820	K4me3 K4me1
ENSMUSG00000028843.8	Sh3bgrl3	chr4	134126737	134130737	K4me3 K4me1 K27ac
ENSMUSG00000028849.17	Map7d1	chr4	126231548	126235548	Unmarked
ENSMUSG00000029030.14	Tprgl	chr4	154158166	154162166	K4me3 K27ac
ENSMUSG00000029036.18	Atad3a	chr4	155747343	155751343	Unmarked
ENSMUSG00000029090.12	Adgra3	chr5	50051379	50055379	Unmarked
ENSMUSG00000029121.16	Crmp1	chr5	37266740	37270740	Unmarked
ENSMUSG00000029167.13	Ppargc1a	chr5	51551871	51555871	K4me3 K4me1
ENSMUSG00000029193.7	Cckar	chr5	53705253	53709253	K4me1
ENSMUSG00000029231.15	Pdgfra	chr5	75151585	75155585	Bivalent
ENSMUSG00000029270.10	Dipk1a	chr5	107970998	107974998	K4me1
ENSMUSG00000029304.14	Spp1	chr5	104434191	104438191	K4me3 K4me1 K27ac
ENSMUSG00000029309.7	Sparcl1	chr5	104111439	104115439	K4me1
ENSMUSG00000029322.12	Plac8	chr5	100570245	100574245	K4me1
ENSMUSG00000029465.14	Arpc3	chr5	122389921	122393921	K4me3 K27ac
ENSMUSG00000029484.12	Anxa3	chr5	96809065	96813065	Unmarked
ENSMUSG00000029570.5	Lfng	chr5	140609508	140613508	K4me3 K4me1 K27ac
ENSMUSG00000029685.15	Asb15	chr6	24554071	24558071	K4me1
ENSMUSG00000029695.13	Aass	chr6	23130986	23134986	K4me3 K4me1
ENSMUSG00000029718.14	Pcolce	chr5	137611762	137615762	K4me1 K27ac
ENSMUSG00000029722.15	Agfg2	chr5	137659762	137663762	K4me1
ENSMUSG00000029819.6	Npy	chr6	49820709	49824709	Bivalent
ENSMUSG00000029830.15	Svopl	chr6	38016611	38020611	Unmarked
ENSMUSG00000029859.6	Epha1	chr6	42371235	42375235	K4me3 K4me1
ENSMUSG00000030017.2	Reg3g	chr6	78466872	78470872	K4me1
ENSMUSG00000030054.4	Gp9	chr6	87776071	87780071	K4me1
ENSMUSG00000030075.10	Cntn3	chr6	102571101	102575101	Unmarked
ENSMUSG00000030137.8	Tuba8	chr6	121208695	121212695	Bivalent
ENSMUSG00000030158.12	Clec12b	chr6	129383874	129387874	K4me1
ENSMUSG00000030159.15	Clec1b	chr6	129395606	129399606	K4me1
ENSMUSG00000030189.15	Ybx3	chr6	131376502	131380502	Unmarked
ENSMUSG00000030208.15	Emp1	chr6	135360930	135364930	K4me1
ENSMUSG00000030218.2	Mgp	chr6	136873823	136877823	Unmarked
ENSMUSG00000030219.13	Erp27	chr6	136920180	136924180	K4me1
ENSMUSG00000030220.13	Arhgdib	chr6	136939868	136943868	K4me1
ENSMUSG00000030222.13	Rerg	chr6	137167732	137171732	K4me3 K4me1
ENSMUSG00000030247.9	Kcnj8	chr6	142569371	142573371	Bivalent
ENSMUSG00000030249.15	Abcc9	chr6	142700274	142704274	Repressed
ENSMUSG00000030344.11	Akap3	chr6	126851159	126855159	Repressed
ENSMUSG00000030409.16	Dmpk	chr7	19084499	19088499	K4me3 K4me1 K27ac
ENSMUSG00000030428.16	Ttyh1	chr7	4117532	4121532	K4me3 K4me1 K27ac
ENSMUSG00000030505.17	Prmt3	chr7	49796389	49800389	Unmarked
ENSMUSG00000030538.15	Cib1	chr7	80230581	80234581	K4me3 K4me1 K27ac
ENSMUSG00000030562.17	Nox4	chr7	87244648	87248648	Unmarked
ENSMUSG00000030605.15	Mfge8	chr7	79145560	79149560	K4me3 K4me1 K27ac
ENSMUSG00000030609.18	Aen	chr7	78900578	78904578	K4me1 K27ac
ENSMUSG00000030621.17	Me3	chr7	89630391	89634391	K4me3 K4me1
ENSMUSG00000030630.16	Fah	chr7	84603729	84607729	K4me3 K4me1 K27ac
ENSMUSG00000030647.8	Ndufc2	chr7	97398102	97402102	K4me3 K27ac
ENSMUSG00000030652.11	Coq7	chr7	118531301	118535301	K4me3 K27ac
ENSMUSG00000030782.16	Tgfb1i1	chr7	128244995	128248995	K4me3 K4me1
ENSMUSG00000030849.18	Fgfr2	chr7	130264245	130268245	K4me3 K27ac
ENSMUSG00000030911.7	Zp2	chr7	120143183	120147183	Unmarked
ENSMUSG00000031502.11	Col4a1	chr8	11230439	11234439	K4me1
ENSMUSG00000031538.6	Plat	chr8	22755726	22759726	K4me1
ENSMUSG00000031635.14	Anxa10	chr8	62121116	62125116	Unmarked
ENSMUSG00000031671.11	Setd6	chr8	95713914	95717914	K4me3 K4me1 K27ac
ENSMUSG00000031673.6	Cdh11	chr8	102783642	102787642	Bivalent
ENSMUSG00000031727.8	Pmfbp1	chr8	109492026	109496026	Unmarked
ENSMUSG00000031740.8	Mmp2	chr8	92838183	92842183	Unmarked
ENSMUSG00000031787.8	Katnb1	chr8	95080595	95084595	K4me3 K27ac
ENSMUSG00000031825.16	Crispld2	chr8	120011207	120015207	K4me1
ENSMUSG00000031875.7	Cmtm3	chr8	104338527	104342527	K4me3 K4me1 K27ac
ENSMUSG00000031997.9	Trpc6	chr9	8542195	8546195	Bivalent
ENSMUSG00000032011.5	Thy1	chr9	44041383	44045383	Bivalent
ENSMUSG00000032033.11	Barx2	chr9	31911462	31915462	Bivalent
ENSMUSG00000032083.8	Apoa1	chr9	46226720	46230720	K4me1
ENSMUSG00000032085.5	Tagln	chr9	45934058	45938058	K4me1
ENSMUSG00000032122.15	Slc37a2	chr9	37253738	37257738	K4me3 K4me1
ENSMUSG00000032135.15	Mcam	chr9	44134860	44138860	K4me3 K4me1
ENSMUSG00000032231.14	Anxa2	chr9	69478110	69482110	K4me1
ENSMUSG00000032243.8	Itga11	chr9	62675859	62679859	K4me3 K4me1
ENSMUSG00000032279.11	Idh3a	chr9	54593093	54597093	Unmarked
ENSMUSG00000032281.11	Acsbg1	chr9	54641158	54645158	K4me1
ENSMUSG00000032294.17	Pkm	chr9	59655239	59659239	K4me3 K4me1 K27ac
ENSMUSG00000032299.10	Commd4	chr9	57155125	57159125	K4me3 K4me1
ENSMUSG00000032363.15	Adamts7	chr9	90193127	90197127	Unmarked
ENSMUSG00000032380.9	Dapk2	chr9	66156222	66160222	Repressed
ENSMUSG00000032503.18	Arpp21	chr9	112232423	112236423	Bivalent
ENSMUSG00000032577.16	Mapkapk3	chr9	107287779	107291779	K4me3 K4me1
ENSMUSG00000032609.12	Klhdc8b	chr9	108459073	108463073	K4me3 K27ac
ENSMUSG00000032625.14	Thsd7a	chr6	12322693	12326693	Unmarked
ENSMUSG00000032766.9	Gng11	chr6	4001903	4005903	K4me1
ENSMUSG00000032834.11	Pwp2	chr10	78183149	78187149	K4me3 K27ac
ENSMUSG00000032878.16	Ccdc85a	chr11	28574437	28578437	Unmarked
ENSMUSG00000032925.16	Itgbl1	chr14	123657970	123661970	Unmarked
ENSMUSG00000032946.16	Rasgrp2	chr19	6399718	6403718	Bivalent
ENSMUSG00000032965.11	Ift57	chr16	49708921	49712921	K4me1
ENSMUSG00000033032.15	Afap1l1	chr18	61784660	61788660	K4me3 K4me1
ENSMUSG00000033066.15	Gas7	chr11	67584535	67588535	K4me1
ENSMUSG00000033083.16	Tbc1d4	chr14	101461223	101465223	Unmarked
ENSMUSG00000033152.13	Podxl2	chr6	88872045	88876045	Bivalent
ENSMUSG00000033475.15	Tomm6	chr17	47686183	47690183	K4me3 K27ac
ENSMUSG00000033510.14	Otud7a	chr7	63442776	63446776	Repressed
ENSMUSG00000033721.16	Vav3	chr3	109571906	109575906	Unmarked
ENSMUSG00000033854.10	Kcnk10	chr12	98572712	98576712	Repressed
ENSMUSG00000034295.10	Fhod3	chr18	24707444	24711444	K4me3 K4me1
ENSMUSG00000034472.13	Rasd2	chr8	75211943	75215943	Bivalent
ENSMUSG00000034520.14	Gjc1	chr11	102817179	102821179	Repressed
ENSMUSG00000034595.17	Ppp1r18	chr17	35864055	35868055	K4me3 K4me1
ENSMUSG00000034729.16	Mrps10	chr17	47367196	47371196	K4me1
ENSMUSG00000034771.15	Tle2	chr10	81580542	81584542	K4me1
ENSMUSG00000034796.14	Cpne7	chr8	123115377	123119377	Bivalent
ENSMUSG00000034891.13	Sncb	chr13	54764492	54768492	Bivalent
ENSMUSG00000034990.15	Otoa	chr7	121081423	121085423	Unmarked
ENSMUSG00000035385.5	Ccl2	chr11	82033570	82037570	Unmarked
ENSMUSG00000035540.12	Gc	chr5	89455898	89459898	K4me1
ENSMUSG00000035559.9	Mpv17l2	chr8	70758900	70762900	K4me3 K4me1
ENSMUSG00000035615.12	Frmpd1	chr4	45182905	45186905	Repressed
ENSMUSG00000035620.15	Ric8b	chr10	84915653	84919653	K4me3 K27ac
ENSMUSG00000035934.16	Pknox2	chr9	37143660	37147660	Bivalent
ENSMUSG00000035960.14	Apex1	chr14	50922977	50926977	K4me3 K4me1 K27ac
ENSMUSG00000036103.9	Colec12	chr18	9705600	9709600	Bivalent
ENSMUSG00000036144.6	Meox2	chr12	37106539	37110539	Bivalent
ENSMUSG00000036192.15	Rorb	chr19	18999100	19003100	Unmarked
ENSMUSG00000036199.9	Ndufa13	chr8	69900558	69904558	K4me3 K4me1 K27ac
ENSMUSG00000036218.16	Pdzrn4	chr15	92741642	92745642	Unmarked
ENSMUSG00000036256.13	Igfbp7	chr5	77406040	77410040	Bivalent
ENSMUSG00000036273.15	Lrrk2	chr15	91671174	91675174	Repressed
ENSMUSG00000036510.17	Cdh8	chr8	99414439	99418439	Bivalent
ENSMUSG00000036613.8	Eipr1	chr12	28860848	28864848	Unmarked
ENSMUSG00000036751.7	Cox6b1	chr7	30624151	30628151	K4me3 K27ac
ENSMUSG00000036766.12	Dner	chr1	84694019	84698019	Bivalent
ENSMUSG00000036913.15	Trim67	chr8	124791091	124795091	K4me3 K4me1 K27ac
ENSMUSG00000036938.17	Try5	chr6	41314841	41318841	Unmarked
ENSMUSG00000037032.16	Apbb1	chr7	105565294	105569294	K4me1 K27ac
ENSMUSG00000037060.3	Cavin3	chr7	105480300	105484300	Bivalent
ENSMUSG00000037108.13	Zcwpw1	chr5	137797188	137801188	Unmarked
ENSMUSG00000037206.15	Islr	chr9	58157221	58161221	K4me1
ENSMUSG00000037362.8	Ccn3	chr15	54743701	54747701	Bivalent
ENSMUSG00000037605.16	Adgrl3	chr5	81643988	81647988	Unmarked
ENSMUSG00000037613.16	Tnfrsf23	chr7	143683872	143687872	Unmarked
ENSMUSG00000037716.15	Ccdc33	chr9	58112360	58116360	K4me3 K4me1 K27ac
ENSMUSG00000037736.20	Limch1	chr5	66896430	66900430	Unmarked
ENSMUSG00000037855.15	Zfp365	chr10	67897007	67901007	Unmarked
ENSMUSG00000037907.16	Ankrd13b	chr11	77471625	77475625	Unmarked
ENSMUSG00000037916.14	Ndufv1	chr19	4010673	4014673	K4me3 K27ac
ENSMUSG00000037921.15	Ddx60	chr8	61926088	61930088	Unmarked
ENSMUSG00000037942.5	Crp	chr1	172696055	172700055	K4me3 K4me1 K27ac
ENSMUSG00000038168.5	P3h2	chr16	26103784	26107784	K4me3 K4me1
ENSMUSG00000038188.17	Scarf1	chr11	75511539	75515539	Unmarked
ENSMUSG00000038370.6	Pcp4l1	chr1	171194268	171198268	Bivalent
ENSMUSG00000038463.8	Olfml2b	chr1	170642531	170646531	K4me1
ENSMUSG00000038515.10	Grtp1	chr8	13198556	13202556	K4me3 K27ac
ENSMUSG00000038600.12	Atp6v0a4	chr6	38122586	38126586	K4me1
ENSMUSG00000038811.13	Gngt2	chr11	95841231	95845231	Repressed
ENSMUSG00000039109.16	F13a1	chr13	37047187	37051187	Unmarked
ENSMUSG00000039178.9	Tbc1d19	chr5	53889103	53893103	Unmarked
ENSMUSG00000039195.4	1110008P14Rik	chr2	32379862	32383862	K4me3 K4me1
ENSMUSG00000039405.7	Prss23	chr7	89516548	89520548	K4me3 K4me1
ENSMUSG00000039419.17	Cntnap2	chr6	45058060	45062060	Repressed
ENSMUSG00000039438.7	Ttc36	chr9	44801072	44805072	K4me1 K27ac
ENSMUSG00000039450.11	Dcxr	chr11	120725281	120729281	Unmarked
ENSMUSG00000039481.5	Nrtn	chr17	56755530	56759530	K4me3 K27ac
ENSMUSG00000039628.9	Hs3st6	chr17	24751002	24755002	Bivalent
ENSMUSG00000039629.14	Strip2	chr6	29915012	29919012	Bivalent
ENSMUSG00000039997.16	Ifi203	chr1	173940492	173944492	Unmarked
ENSMUSG00000040086.13	Tnni3k	chr3	155053407	155057407	Unmarked
ENSMUSG00000040111.17	Gramd1b	chr9	40463564	40467564	K4me1
ENSMUSG00000040213.13	Kyat3	chr3	142735611	142739611	Unmarked
ENSMUSG00000040270.16	Bach2	chr4	32237076	32241076	K4me3 K27ac
ENSMUSG00000040274.11	Cdk6	chr5	3341731	3345731	K4me3 K27ac
ENSMUSG00000040690.15	Col16a1	chr4	130075042	130079042	K4me1 K27ac
ENSMUSG00000040694.4	Apobec2	chr17	48430930	48434930	K4me1 K27ac
ENSMUSG00000040797.16	Iqsec3	chr6	121471678	121475678	Repressed
ENSMUSG00000040824.3	Snrpd2	chr7	19147858	19151858	K4me3 K4me1 K27ac
ENSMUSG00000040950.13	Mgl2	chr11	70128423	70132423	Unmarked
ENSMUSG00000040966.10	Slc22a2	chr17	12582192	12586192	K4me1 K27ac
ENSMUSG00000041420.18	Meis3	chr7	16173274	16177274	K4me3 K4me1 K27ac
ENSMUSG00000041482.17	Piezo2	chr18	63324649	63328649	Unmarked
ENSMUSG00000041559.7	Fmod	chr1	134035253	134039253	K4me1
ENSMUSG00000041577.5	Prelp	chr1	133919411	133923411	K4me1
ENSMUSG00000041670.17	Rims1	chr1	22313805	22317805	K4me1
ENSMUSG00000041697.8	Cox6a1	chr5	115346914	115350914	K4me3 K27ac
ENSMUSG00000041765.6	Ubac2	chr14	121914202	121918202	Unmarked
ENSMUSG00000041774.16	Ydjc	chr16	17144982	17148982	K4me3 K4me1
ENSMUSG00000041801.5	Phlda3	chr1	135764118	135768118	K4me3 K4me1
ENSMUSG00000041949.6	Tango6	chr8	106681145	106685145	K4me3 K27ac
ENSMUSG00000041992.9	Rapgef5	chr12	117593240	117597240	K4me1
ENSMUSG00000042099.16	Kank3	chr17	33808522	33812522	K4me3 K4me1
ENSMUSG00000042115.4	Klhdc8a	chr1	132296625	132300625	Repressed
ENSMUSG00000042215.8	Bag2	chr1	33746719	33750719	Unmarked
ENSMUSG00000042604.5	Kcna4	chr2	107289394	107293394	K4me3 K4me1
ENSMUSG00000042671.12	Rgs8	chr1	153663672	153667672	K4me1
ENSMUSG00000042828.12	Trim72	chr7	128002377	128006377	K4me1
ENSMUSG00000042942.18	Greb1l	chr18	10507396	10511396	Unmarked
ENSMUSG00000043557.16	Mdga1	chr17	29833358	29837358	K4me1
ENSMUSG00000043671.14	Dpy19l3	chr7	35723344	35727344	Unmarked
ENSMUSG00000043943.14	Naalad2	chr9	18400995	18404995	Unmarked
ENSMUSG00000043972.8	Opn5	chr17	42609395	42613395	K4me1
ENSMUSG00000044033.16	Ccdc141	chr2	77042730	77046730	Unmarked
ENSMUSG00000044080.9	S100a1	chr3	90512392	90516392	K4me3 K4me1 K27ac
ENSMUSG00000044502.16	Bod1	chr11	31669885	31673885	K4me3 K27ac
ENSMUSG00000044533.15	Rps2	chr17	24719448	24723448	K4me3 K27ac
ENSMUSG00000044734.16	Serpinb1a	chr13	32849185	32853185	K4me1 K27ac
ENSMUSG00000044894.14	Uqcrq	chr11	53428827	53432827	K4me3 K4me1 K27ac
ENSMUSG00000044976.17	Wdr72	chr9	74108355	74112355	K4me3 K4me1
ENSMUSG00000045160.14	Bola3	chr6	83350094	83354094	Unmarked
ENSMUSG00000045349.15	Sh2d5	chr4	138248463	138252463	K4me3 K4me1 K27ac
ENSMUSG00000045404.16	Kcnk13	chr12	99962498	99966498	Bivalent
ENSMUSG00000045672.15	Col27a1	chr4	63328992	63332992	Unmarked
ENSMUSG00000045868.12	Gvin1	chr7	106213310	106217310	Unmarked
ENSMUSG00000046442.4	Ppm1e	chr11	87357023	87361023	Bivalent
ENSMUSG00000046500.8	Tafa4	chr6	97058413	97062413	Bivalent
ENSMUSG00000046768.13	Rhoj	chr12	75306321	75310321	K4me3 K4me1
ENSMUSG00000046997.5	Spsb4	chr9	97016843	97020843	K4me3 K4me1 K27ac
ENSMUSG00000047497.10	Adamts12	chr15	11062808	11066808	K4me3 K4me1
ENSMUSG00000047821.16	Trim16	chr11	62818230	62822230	K4me3 K4me1
ENSMUSG00000047867.11	Gimap6	chr6	48706213	48710213	Bivalent
ENSMUSG00000048332.13	Lhfp	chr3	53227324	53231324	Unmarked
ENSMUSG00000048376.6	F2r	chr13	95616487	95620487	K4me3 K27ac
ENSMUSG00000048458.8	Inka2	chr3	105703457	105707457	Repressed
ENSMUSG00000048483.6	Zdhhc22	chr12	86986676	86990676	Bivalent
ENSMUSG00000048612.16	Myof	chr19	38041351	38045351	K4me3 K4me1
ENSMUSG00000048776.8	Pthlh	chr6	147262167	147266167	Bivalent
ENSMUSG00000048827.12	Pkd1l3	chr8	109629331	109633331	Unmarked
ENSMUSG00000048960.13	Prex2	chr1	11096529	11100529	Unmarked
ENSMUSG00000048978.14	Nrsn1	chr13	25267970	25271970	K4me3 K4me1
ENSMUSG00000049115.15	Agtr1a	chr13	30334440	30338440	K4me3 K4me1
ENSMUSG00000050147.9	F2rl3	chr8	72759883	72763883	K4me1
ENSMUSG00000050335.17	Lgals3	chr14	47365750	47369750	K4me1 K27ac
ENSMUSG00000050370.5	Ch25h	chr19	34473164	34477164	Bivalent
ENSMUSG00000050666.14	Vstm4	chr14	32854755	32858755	Bivalent
ENSMUSG00000050711.7	Scg2	chr1	79438042	79442042	Unmarked
ENSMUSG00000050830.17	Vwc2	chr11	11113850	11117850	Bivalent
ENSMUSG00000051506.17	Wdfy4	chr14	33021337	33025337	Unmarked
ENSMUSG00000052572.19	Dlg2	chr7	90474693	90478693	Repressed
ENSMUSG00000053093.16	Myh7	chr14	54992626	54996626	K4me1 K27ac
ENSMUSG00000053199.13	Arhgap20	chr9	51763344	51767344	Bivalent
ENSMUSG00000053801.18	Grwd1	chr7	45828881	45832881	Repressed
ENSMUSG00000053965.10	Pde5a	chr3	122793233	122797233	Unmarked
ENSMUSG00000054134.14	Umodl1	chr17	30952678	30956678	Unmarked
ENSMUSG00000054206.2	Gzmm	chr10	79687019	79691019	Unmarked
ENSMUSG00000054321.7	Taf4b	chr18	14781244	14785244	K4me3 K27ac
ENSMUSG00000054435.16	Gimap4	chr6	48682577	48686577	Unmarked
ENSMUSG00000054555.11	Adam12	chr7	133959265	133963265	Unmarked
ENSMUSG00000054690.17	Emcn	chr3	137339142	137343142	Unmarked
ENSMUSG00000054966.13	Lmntd1	chr6	145612319	145616319	Unmarked
ENSMUSG00000055116.8	Arntl	chr7	113232622	113236622	Unmarked
ENSMUSG00000055235.11	Wdr86	chr5	24728727	24732727	K4me3 K4me1
ENSMUSG00000055865.8	Tafa3	chr3	104779840	104783840	Bivalent
ENSMUSG00000056025.12	Clca3a1	chr3	144758977	144762977	K4me1
ENSMUSG00000056367.14	Actr3b	chr5	25757996	25761996	K4me3 K4me1
ENSMUSG00000056494.7	Cngb3	chr4	19278849	19282849	K4me1
ENSMUSG00000056632.8	Dsg3	chr18	20508282	20512282	K4me1
ENSMUSG00000057378.15	Ryr3	chr2	112906497	112910497	K4me1
ENSMUSG00000057455.12	Rit2	chr18	31315290	31319290	Unmarked
ENSMUSG00000057963.9	Itpk1	chr12	102702930	102706930	K4me3 K27ac
ENSMUSG00000058076.12	Sdhc	chr1	171148591	171152591	K4me3 K27ac
ENSMUSG00000058119.6	Gm5771	chr6	41390355	41394355	Unmarked
ENSMUSG00000058145.16	Adamts17	chr7	66837734	66841734	K4me3 K4me1
ENSMUSG00000058715.11	Fcer1g	chr1	171232339	171236339	Unmarked
ENSMUSG00000058806.15	Col13a1	chr10	61977073	61981073	Bivalent
ENSMUSG00000059049.14	Frem1	chr4	82968703	82972703	Unmarked
ENSMUSG00000059355.13	Wdr83os	chr8	85078739	85082739	K4me3 K27ac
ENSMUSG00000059734.7	Ndufs8	chr19	3910734	3914734	K4me3 K27ac
ENSMUSG00000060032.6	H2aj	chr6	136806243	136810243	K4me3 K4me1 K27ac
ENSMUSG00000060568.14	Fam78b	chr1	166999588	167003588	Bivalent
ENSMUSG00000060802.8	B2m	chr2	122145685	122149685	K4me3 K27ac
ENSMUSG00000061322.15	Dnaic1	chr4	41629643	41633643	K4me1
ENSMUSG00000061518.11	Cox5b	chr1	36689448	36693448	K4me3 K4me1 K27ac
ENSMUSG00000061576.15	Dpp6	chr5	27531776	27535776	Unmarked
ENSMUSG00000061603.8	Akap6	chr12	52697382	52701382	K4me3 K4me1
ENSMUSG00000061762.12	Tac1	chr6	7554090	7558090	Bivalent
ENSMUSG00000062380.4	Tubb3	chr8	123409423	123413423	Bivalent
ENSMUSG00000062515.3	Fabp4	chr3	10206576	10210576	Unmarked
ENSMUSG00000062751.5	Prss1	chr6	41456931	41460931	Unmarked
ENSMUSG00000063275.15	Hacd1	chr2	14054135	14058135	K4me3 K27ac
ENSMUSG00000064293.14	Cntn4	chr6	106116917	106120917	Unmarked
ENSMUSG00000064317.5	Gm10146	chr10	78391319	78395319	K4me1 K27ac
ENSMUSG00000064945.1	Rny3	chr6	47779623	47783623	K4me3 K27ac
ENSMUSG00000066607.5	Insyn1	chr9	58486602	58490602	Bivalent
ENSMUSG00000066755.2	Tnfsf18	chr1	161492654	161496654	Unmarked
ENSMUSG00000067719.5	Gm10221	chr5	24579862	24583862	Unmarked
ENSMUSG00000067872.2	Ccdc87	chr19	4837365	4841365	Repressed
ENSMUSG00000068220.6	Lgals1	chr15	78924725	78928725	K4me1
ENSMUSG00000068245.14	Phf11d	chr14	59363444	59367444	Unmarked
ENSMUSG00000068341.8	Reg3d	chr6	78376865	78380865	Unmarked
ENSMUSG00000069307.6	Hist1h2bq	chr13	21808171	21812171	Unmarked
ENSMUSG00000069516.8	Lyz2	chr10	117280321	117284321	Unmarked
ENSMUSG00000069707.1	Taar4	chr10	23958493	23962493	K4me1
ENSMUSG00000070371.11	Prss36	chr7	127933519	127937519	K4me3 K4me1
ENSMUSG00000070424.12	Art5	chr7	102097493	102101493	K4me3 K4me1 K27ac
ENSMUSG00000070436.12	Serpinh1	chr7	99350997	99354997	K4me3 K4me1 K27ac
ENSMUSG00000070471.3	Erich6	chr3	58635207	58639207	K4me3 K4me1 K27ac
ENSMUSG00000070530.5	Wfdc16	chr2	164636796	164640796	K4me1
ENSMUSG00000070942.8	Il1rl2	chr1	40322626	40326626	K4me3 K4me1
ENSMUSG00000070953.13	Rabepk	chr2	34797912	34801912	K4me3 K27ac
ENSMUSG00000071014.10	Ndufb6	chr4	40277409	40281409	K4me3 K27ac
ENSMUSG00000071202.5	Ccdc78	chr17	25784579	25788579	Unmarked
ENSMUSG00000071517.6	Gm10334	chr6	41444145	41448145	Unmarked
ENSMUSG00000071519.6	Prss3	chr6	41375678	41379678	Unmarked
ENSMUSG00000071521.4	Try10	chr6	41352104	41356104	Unmarked
ENSMUSG00000071604.5	Fam189a2	chr19	24029019	24033019	K4me3 K4me1
ENSMUSG00000072437.4	Nanos1	chr19	60753986	60757986	K4me3 K27ac
ENSMUSG00000073599.10	Ecscr	chr18	35715290	35719290	Unmarked
ENSMUSG00000073856.11	Iqck	chr7	118853751	118857751	K4me3 K4me1 K27ac
ENSMUSG00000073987.4	Ggh	chr4	20040051	20044051	K4me3 K4me1
ENSMUSG00000074284.6	Gm10658	chr9	57069807	57073807	K4me3 K4me1 K27ac
ENSMUSG00000074505.6	Fat3	chr9	15955822	15959822	Unmarked
ENSMUSG00000074643.12	Cpne1	chr2	156076591	156080591	K4me1 K27ac
ENSMUSG00000075224.10	Lrrc55	chr2	85194699	85198699	Repressed
ENSMUSG00000075478.3	Slitrk1	chr14	108912158	108916158	Bivalent
ENSMUSG00000075704.16	Txnrd2	chr16	18426924	18430924	Unmarked
ENSMUSG00000078252.1	Krtap17-1	chr11	99991994	99995994	K4me3 K4me1 K27ac
ENSMUSG00000078636.4	Gm7336	chr7	51744646	51748646	Unmarked
ENSMUSG00000079017.3	Ifi27l2a	chr12	103441680	103445680	Unmarked
ENSMUSG00000079516.2	Reg3a	chr6	78378708	78382708	Unmarked
ENSMUSG00000084128.10	Esrp2	chr8	106134813	106138813	K4me3 K4me1 K27ac
ENSMUSG00000085022.2	Gm5860	chr4	82063430	82067430	K4me1
ENSMUSG00000085077.1	1700049E15Rik	chr6	147688240	147692240	K4me1
ENSMUSG00000085328.2	Gm17131	chr5	127876530	127880530	Unmarked
ENSMUSG00000085541.1	Gm16010	chr9	97015473	97019473	K4me3 K4me1 K27ac
ENSMUSG00000085810.7	Gm16325	chr3	146646608	146650608	K4me1
ENSMUSG00000085926.1	Gm12299	chr11	67000085	67004085	K4me1
ENSMUSG00000085965.1	2310016D23Rik	chr1	60776842	60780842	Unmarked
ENSMUSG00000086044.1	A330043C09Rik	chr2	75175658	75179658	K4me1
ENSMUSG00000086390.7	1810019D21Rik	chr8	106133399	106137399	K4me3 K4me1 K27ac
ENSMUSG00000086706.7	Gm15848	chr1	130822084	130826084	K4me1 K27ac
ENSMUSG00000086741.1	Gm15816	chr8	23147585	23151585	Bivalent
ENSMUSG00000087196.1	Gm13373	chr2	28322050	28326050	K4me1 K27ac
ENSMUSG00000087242.2	C78197	chr11	68194153	68198153	K4me1 K27ac
ENSMUSG00000087574.1	C030037D09Rik	chr11	88718488	88722488	K4me1
ENSMUSG00000087579.7	Hectd2os	chr19	36687273	36691273	K4me1
ENSMUSG00000090002.1	Gm16006	chr15	57706927	57710927	K4me1
ENSMUSG00000090137.8	Uba52	chr8	70508355	70512355	K4me3 K27ac
ENSMUSG00000090223.2	Pcp4	chr16	96497619	96501619	K4me1
ENSMUSG00000090237.1	Gm16308	chr15	71808107	71812107	K4me1
ENSMUSG00000090254.7	Gm1965	chr6	89139004	89143004	Unmarked
ENSMUSG00000090263.1	D730045A05Rik	chr18	74015906	74019906	Unmarked
ENSMUSG00000090996.1	Gm20458	chr2	164458966	164462966	K4me3 K27ac
ENSMUSG00000092071.1	A230065N10Rik	chr7	89631124	89635124	K4me3 K4me1
ENSMUSG00000094445.7	1700015G11Rik	chr7	52013728	52017728	Unmarked
ENSMUSG00000095937.1	Gm12671	chr4	91850669	91854669	Unmarked
ENSMUSG00000096257.2	Ccer2	chr7	28754173	28758173	Bivalent
ENSMUSG00000096525.2	Gm2663	chr6	40997479	41001479	Unmarked
ENSMUSG00000097310.2	A930038B10Rik	chr14	34757401	34761401	K4me1 K27ac
ENSMUSG00000097636.8	Mirt1	chr19	53462783	53466783	Unmarked
ENSMUSG00000097789.2	Gm2115	chr7	84526953	84530953	Bivalent
ENSMUSG00000098128.1	Gm3693	chr12	81226283	81230283	K4me1
ENSMUSG00000099519.1	Gm29253	chr1	75183146	75187146	Unmarked
ENSMUSG00000099988.7	1700054A03Rik	chr19	53074242	53078242	K4me1
ENSMUSG00000100182.6	1810006J02Rik	chr1	98129455	98133455	Unmarked
ENSMUSG00000100303.3	2600014E21Rik	chr2	75136842	75140842	Bivalent
ENSMUSG00000100837.7	1700063D05Rik	chr9	41214947	41218947	Unmarked
ENSMUSG00000100965.1	Gm28449	chr1	61472950	61476950	Unmarked
ENSMUSG00000102549.1	Gm38137	chr1	60878337	60882337	K4me1 K27ac
ENSMUSG00000103428.1	Gm20754	chr3	73064350	73068350	Unmarked
ENSMUSG00000104022.1	Gm37214	chr1	183418654	183422654	Unmarked
ENSMUSG00000104234.1	5330439B14Rik	chr6	142612594	142616594	K4me1 K27ac
ENSMUSG00000104610.1	Gm567	chr3	137287638	137291638	Unmarked
ENSMUSG00000106270.1	C820005J03Rik	chr3	53754730	53758730	K4me1 K27ac
ENSMUSG00000107167.3	Gm34653	chr2	34831006	34835006	Unmarked
ENSMUSG00000107271.3	BC028471	chr5	149367045	149371045	K4me1
ENSMUSG00000107314.1	Gm20488	chr5	149366475	149370475	K4me1
ENSMUSG00000107877.2	Gm43951	chr11	72201371	72205371	Unmarked
ENSMUSG00000108687.1	Gm45007	chr7	73704540	73708540	K4me1
ENSMUSG00000108930.1	Gm10648	chr7	28874331	28878331	Unmarked
ENSMUSG00000109029.1	Gm44717	chr8	11147246	11151246	K4me1
ENSMUSG00000109446.1	Gm9195	chr14	72489838	72493838	Unmarked
ENSMUSG00000110353.1	Gm33543	chr10	95840896	95844896	K4me1
ENSMUSG00000112331.1	Gm33035	chr10	69031888	69035888	K4me1
ENSMUSG00000113650.1	Gm47826	chr13	9754879	9758879	K4me1
ENSMUSG00000113940.1	Gm40477	chr12	85434081	85438081	Unmarked
ENSMUSG00000114452.1	A530001N23Rik	chr13	60483967	60487967	K4me1
ENSMUSG00000115219.2	Eef1akmt4	chr16	20609592	20613592	K4me3 K4me1 K27ac
ENSMUSG00000115426.1	Gm19510	chr15	59792959	59796959	Unmarked
ENSMUSG00000115811.1	Gm41293	chr15	36208705	36212705	Unmarked
ENSMUSG00000116066.1	Gm49477	chr15	103133880	103137880	K4me1 K27ac
ENSMUSG00000116810.1	Gm32624	chr16	86814873	86818873	K4me1 K27ac
ENSMUSG00000116814.1	Gm49636	chr16	29752312	29756312	K4me1 K27ac
ENSMUSG00000117485.1	Gm19696	chr17	84133960	84137960	K4me1 K27ac
ENSMUSG00000117984.1	Gm31819	chr18	72723067	72727067	K4me1

## Sheet: Stable Ngn_H
geneID	geneSymbol	Chr	Start	End	Chromatin State
ENSMUSG00000000001.4	Gnai3	chr3	108144146	108148146	K4me3 K27ac
ENSMUSG00000000028.15	Cdc45	chr16	18809987	18813987	K4me3 K27ac
ENSMUSG00000000056.7	Narf	chr11	121243019	121247019	Unmarked
ENSMUSG00000000058.6	Cav2	chr6	17279326	17283326	K4me3 K4me1
ENSMUSG00000000078.7	Klf6	chr13	5859540	5863540	K4me3 K4me1 K27ac
ENSMUSG00000000085.16	Scmh1	chr4	120515625	120519625	K4me1 K27ac
ENSMUSG00000000093.6	Tbx2	chr11	85830550	85834550	Bivalent
ENSMUSG00000000120.6	Ngfr	chr11	95585735	95589735	Bivalent
ENSMUSG00000000126.11	Wnt9a	chr11	59304929	59308929	Bivalent
ENSMUSG00000000127.15	Fer	chr17	63862014	63866014	K4me3 K4me1 K27ac
ENSMUSG00000000131.15	Xpo6	chr7	126158871	126162871	K4me1
ENSMUSG00000000142.15	Axin2	chr11	108918348	108922348	K4me3 K27ac
ENSMUSG00000000148.17	Brat1	chr5	140703051	140707051	K4me3 K27ac
ENSMUSG00000000149.10	Gna12	chr5	140828157	140832157	K4me3 K27ac
ENSMUSG00000000154.16	Slc22a18	chr7	143471767	143475767	K4me1
ENSMUSG00000000167.14	Pih1d2	chr9	50616006	50620006	K4me3 K27ac
ENSMUSG00000000168.9	Dlat	chr9	50644189	50648189	Unmarked
ENSMUSG00000000171.5	Sdhd	chr9	50601812	50605812	K4me3 K4me1 K27ac
ENSMUSG00000000184.12	Ccnd2	chr6	127149007	127153007	Bivalent
ENSMUSG00000000194.13	Gpr107	chr2	31170266	31174266	K4me1
ENSMUSG00000000197.8	Nalcn	chr14	123624961	123628961	K4me3 K4me1
ENSMUSG00000000202.9	Btbd17	chr11	114793892	114797892	K4me3 K4me1 K27ac
ENSMUSG00000000253.13	Gmpr	chr13	45505443	45509443	K4me3 K4me1
ENSMUSG00000000275.16	Trim25	chr11	88997375	89001375	K4me3 K4me1 K27ac
ENSMUSG00000000276.11	Dgke	chr11	89064850	89068850	K4me1
ENSMUSG00000000278.10	Scpep1	chr11	88953465	88957465	K4me3 K27ac
ENSMUSG00000000282.12	Mnt	chr11	74835467	74839467	K4me3 K27ac
ENSMUSG00000000290.13	Itgb2	chr10	77528379	77532379	Unmarked
ENSMUSG00000000295.13	Hddc2	chr10	31311382	31315382	K4me3 K4me1
ENSMUSG00000000296.8	Tpd52l1	chr10	31443819	31447819	K4me3 K27ac
ENSMUSG00000000305.12	Cdh4	chr2	179775162	179779162	K4me1
ENSMUSG00000000308.14	Ckmt1	chr2	121356655	121360655	K4me3 K4me1
ENSMUSG00000000317.11	Bcl6b	chr11	70227798	70231798	Bivalent
ENSMUSG00000000320.10	Alox12	chr11	70253341	70257341	Bivalent
ENSMUSG00000000325.16	Arvcf	chr16	18346273	18350273	K4me3 K27ac
ENSMUSG00000000326.13	Comt	chr16	18411494	18415494	K4me1 K27ac
ENSMUSG00000000339.14	Rtca	chr3	116506065	116510065	K4me1
ENSMUSG00000000340.10	Dbt	chr3	116518327	116522327	K4me1
ENSMUSG00000000346.9	Dazap2	chr15	100614331	100618331	K4me3 K4me1 K27ac
ENSMUSG00000000359.3	Rem1	chr2	152624950	152628950	Bivalent
ENSMUSG00000000374.8	Trappc10	chr10	78242641	78246641	K4me3 K4me1 K27ac
ENSMUSG00000000378.15	Ccm2	chr11	6544886	6548886	K4me3 K4me1 K27ac
ENSMUSG00000000384.15	Tbrg4	chr11	6624043	6628043	K4me3 K4me1 K27ac
ENSMUSG00000000385.8	Tmprss2	chr16	97608969	97612969	Bivalent
ENSMUSG00000000386.16	Mx1	chr16	97458772	97462772	Unmarked
ENSMUSG00000000392.17	Fap	chr2	62561717	62565717	Unmarked
ENSMUSG00000000399.10	Ndufa9	chr6	126847136	126851136	K4me3 K27ac
ENSMUSG00000000409.14	Lck	chr4	129554459	129558459	K4me3 K27ac
ENSMUSG00000000416.16	Cttnbp2	chr6	18512843	18516843	Bivalent
ENSMUSG00000000420.15	Galnt1	chr18	24236322	24240322	K4me1
ENSMUSG00000000439.9	Mkrn2	chr6	115599901	115603901	K4me3 K27ac
ENSMUSG00000000440.12	Pparg	chr6	115358950	115362950	Bivalent
ENSMUSG00000000441.17	Raf1	chr6	115674635	115678635	K4me3 K27ac
ENSMUSG00000000486.13	Sept1	chr7	127213125	127217125	K4me1
ENSMUSG00000000532.11	Acvr1b	chr15	101172066	101176066	K4me3 K4me1 K27ac
ENSMUSG00000000538.18	Tom1l2	chr11	60350905	60354905	K4me3 K4me1 K27ac
ENSMUSG00000000552.10	Zfp385a	chr15	103338093	103342093	K4me3 K4me1
ENSMUSG00000000555.8	Itga5	chr15	103364763	103368763	K4me3 K27ac
ENSMUSG00000000561.14	Wdr77	chr3	105957368	105961368	K4me3 K27ac
ENSMUSG00000000562.5	Adora3	chr3	105868857	105872857	K4me1
ENSMUSG00000000563.17	Atp5pb	chr3	105952181	105956181	Unmarked
ENSMUSG00000000567.5	Sox9	chr11	112780223	112784223	K4me3 K4me1 K27ac
ENSMUSG00000000568.15	Hnrnpd	chr5	99964387	99968387	Unmarked
ENSMUSG00000000579.14	Dynlt1c	chr17	6599803	6603803	Unmarked
ENSMUSG00000000581.8	C1d	chr11	17255591	17259591	K4me3 K27ac
ENSMUSG00000000594.7	Gm2a	chr11	55096114	55100114	K4me3 K27ac
ENSMUSG00000000600.15	Krit1	chr5	3813690	3817690	Unmarked
ENSMUSG00000000605.9	Clcn4	chr7	7294844	7298844	K4me3 K27ac
ENSMUSG00000000627.15	Sema4f	chr6	82915586	82919586	K4me1
ENSMUSG00000000628.10	Hk2	chr6	82770988	82774988	K4me3 K4me1
ENSMUSG00000000631.20	Myo18a	chr11	77848655	77852655	K4me1
ENSMUSG00000000632.13	Sez6	chr11	77929038	77933038	Bivalent
ENSMUSG00000000682.7	Cd52	chr4	134093082	134097082	Unmarked
ENSMUSG00000000686.11	Abhd15	chr11	77516617	77520617	K4me3 K4me1 K27ac
ENSMUSG00000000693.10	Loxl3	chr6	83036399	83040399	Unmarked
ENSMUSG00000000708.14	Kat2b	chr17	53582125	53586125	Unmarked
ENSMUSG00000000711.3	Rab5b	chr10	128694257	128698257	K4me3 K27ac
ENSMUSG00000000732.9	Icosl	chr10	78071338	78075338	Unmarked
ENSMUSG00000000738.18	Spg7	chr8	123085407	123089407	Unmarked
ENSMUSG00000000739.14	Sult5a1	chr8	123156270	123160270	K4me1
ENSMUSG00000000740.12	Rpl13	chr8	123100652	123104652	K4me3 K27ac
ENSMUSG00000000743.9	Chmp1a	chr8	123210760	123214760	K4me3 K4me1 K27ac
ENSMUSG00000000751.13	Rpa1	chr11	75340188	75344188	K4me1 K27ac
ENSMUSG00000000759.14	Tubgcp3	chr8	12655620	12659620	Unmarked
ENSMUSG00000000766.18	Oprm1	chr10	6786808	6790808	Repressed
ENSMUSG00000000776.13	Polr3d	chr14	70441420	70445420	K4me3 K27ac
ENSMUSG00000000782.16	Tcf7	chr11	52280571	52284571	Bivalent
ENSMUSG00000000792.2	Slc5a5	chr8	70890757	70894757	Bivalent
ENSMUSG00000000794.9	Kcnn3	chr3	89518163	89522163	Bivalent
ENSMUSG00000000804.14	Usp32	chr11	85038038	85042038	Unmarked
ENSMUSG00000000805.18	Car4	chr11	84955824	84959824	Bivalent
ENSMUSG00000000811.13	Txnrd3	chr6	89641987	89645987	K4me3 K27ac
ENSMUSG00000000823.16	Zfp512b	chr2	181584361	181588361	Unmarked
ENSMUSG00000000826.16	Dnajc5	chr2	181547325	181551325	Unmarked
ENSMUSG00000000827.18	Tpd52l2	chr2	181495164	181499164	K4me3 K27ac
ENSMUSG00000000861.15	Bcl11a	chr11	24076172	24080172	K4me3 K27ac
ENSMUSG00000000876.11	Pxmp4	chr2	154601708	154605708	K4me3 K4me1 K27ac
ENSMUSG00000000901.17	Mmp11	chr10	75921993	75925993	Unmarked
ENSMUSG00000000902.13	Smarcb1	chr10	75913164	75917164	Unmarked
ENSMUSG00000000915.15	Hip1r	chr5	123992804	123996804	K4me1 K27ac
ENSMUSG00000000916.15	Nsun5	chr5	135367990	135371990	K4me3 K27ac
ENSMUSG00000000934.9	Top1mt	chr15	75668265	75672265	Unmarked
ENSMUSG00000000942.10	Hoxa4	chr6	52189753	52193753	Bivalent
ENSMUSG00000000948.16	Gm38393	chr7	60003064	60007064	Bivalent
ENSMUSG00000000957.11	Mmp14	chr14	54436591	54440591	K4me1
ENSMUSG00000000958.10	Slc7a7	chr14	54415780	54419780	K4me1
ENSMUSG00000000959.7	Oxa1l	chr14	54358833	54362833	K4me3 K27ac
ENSMUSG00000000976.13	Heatr6	chr11	83772423	83776423	Unmarked
ENSMUSG00000000982.5	Ccl3	chr11	83647355	83651355	Unmarked
ENSMUSG00000001016.12	Ilf2	chr3	90474139	90478139	Bivalent
ENSMUSG00000001017.15	Chtop	chr3	90507451	90511451	K4me3 K27ac
ENSMUSG00000001018.15	Snapin	chr3	90488993	90492993	Unmarked
ENSMUSG00000001034.17	Mapk7	chr11	61491705	61495705	K4me3 K27ac
ENSMUSG00000001036.17	Epn2	chr11	61544373	61548373	K4me1
ENSMUSG00000001039.12	B9d1	chr11	61510314	61514314	Unmarked
ENSMUSG00000001052.15	Sec24b	chr3	130038863	130042863	K4me1
ENSMUSG00000001053.15	N4bp3	chr11	51648837	51652837	K4me3 K4me1
ENSMUSG00000001054.9	Rmnd5b	chr11	51633647	51637647	K4me3 K4me1 K27ac
ENSMUSG00000001062.18	Vps9d1	chr8	123244930	123248930	Unmarked
ENSMUSG00000001065.15	Zfp276	chr8	123257459	123261459	Unmarked
ENSMUSG00000001082.12	Mfsd10	chr5	34634807	34638807	K4me3 K4me1 K27ac
ENSMUSG00000001089.14	Luzp1	chr4	136538353	136542353	Unmarked
ENSMUSG00000001098.15	Kctd10	chr5	114366669	114370669	Unmarked
ENSMUSG00000001100.10	Poldip2	chr11	78510415	78514415	K4me3 K27ac
ENSMUSG00000001105.15	Ift20	chr11	78534442	78538442	K4me3 K27ac
ENSMUSG00000001120.15	Pcbp3	chr10	76795864	76799864	K4me1 K27ac
ENSMUSG00000001123.15	Lgals9	chr11	78968330	78972330	Unmarked
ENSMUSG00000001138.13	Cnnm3	chr1	36509866	36513866	K4me3 K27ac
ENSMUSG00000001143.13	Lman2l	chr1	36426366	36430366	Unmarked
ENSMUSG00000001150.7	Mcm3ap	chr10	76508893	76512893	Unmarked
ENSMUSG00000001151.10	Pcnt	chr10	76412032	76416032	Unmarked
ENSMUSG00000001156.9	Mxd1	chr6	86667161	86671161	K4me3 K4me1 K27ac
ENSMUSG00000001157.13	Gmcl1	chr6	86716606	86720606	Unmarked
ENSMUSG00000001158.13	Snrnp27	chr6	86682517	86686517	K4me3 K27ac
ENSMUSG00000001166.17	Oas1c	chr5	120810488	120814488	K4me3 K4me1 K27ac
ENSMUSG00000001175.15	Calm1	chr12	100198158	100202158	K4me3 K4me1 K27ac
ENSMUSG00000001211.15	Agpat3	chr10	78305550	78309550	K4me1 K27ac
ENSMUSG00000001227.12	Sema6b	chr17	56131843	56135843	K4me1
ENSMUSG00000001228.14	Uhrf1	chr17	56302347	56306347	K4me3 K27ac
ENSMUSG00000001229.9	Dpp9	chr17	56207208	56211208	K4me1 K27ac
ENSMUSG00000001240.13	Ramp2	chr11	101244932	101248932	Bivalent
ENSMUSG00000001247.16	Lsr	chr7	30971426	30975426	K4me3 K4me1 K27ac
ENSMUSG00000001248.15	Gramd1a	chr7	31141712	31145712	Unmarked
ENSMUSG00000001249.14	Hpn	chr7	31098283	31102283	Unmarked
ENSMUSG00000001260.10	Gabrg1	chr5	70840314	70844314	Bivalent
ENSMUSG00000001280.13	Sp1	chr15	102405587	102409587	K4me3 K27ac
ENSMUSG00000001285.12	Myg1	chr15	102334770	102338770	Unmarked
ENSMUSG00000001288.15	Rarg	chr15	102250640	102254640	Unmarked
ENSMUSG00000001289.12	Pfdn5	chr15	102324147	102328147	K4me3 K27ac
ENSMUSG00000001300.16	Efnb2	chr8	8637363	8641363	Unmarked
ENSMUSG00000001305.5	Rrp15	chr1	186747325	186751325	K4me3 K27ac
ENSMUSG00000001323.17	Srr	chr11	74923798	74927798	K4me3 K27ac
ENSMUSG00000001333.9	Sync	chr4	129285616	129289616	K4me1 K27ac
ENSMUSG00000001348.15	Acp5	chr9	22133691	22137691	Unmarked
ENSMUSG00000001349.5	Cnn1	chr9	22097267	22101267	Bivalent
ENSMUSG00000001366.14	Fbxo9	chr9	78085636	78089636	Unmarked
ENSMUSG00000001376.17	Vps50	chr6	3515811	3519811	Unmarked
ENSMUSG00000001380.7	Hars	chr18	36781122	36785122	K4me3 K27ac
ENSMUSG00000001383.9	Zmat2	chr18	36791875	36795875	K4me3 K27ac
ENSMUSG00000001403.13	Ube2c	chr2	164767902	164771902	K4me3 K27ac
ENSMUSG00000001415.10	Smg5	chr3	88340440	88344440	Unmarked
ENSMUSG00000001416.13	Cct3	chr3	88295152	88299152	K4me3 K27ac
ENSMUSG00000001418.13	Glmp	chr3	88323054	88327054	K4me3 K4me1 K27ac
ENSMUSG00000001419.17	Mef2d	chr3	88140573	88144573	K4me3 K4me1 K27ac
ENSMUSG00000001420.13	Tmem79	chr3	88334148	88338148	K4me3 K27ac
ENSMUSG00000001424.14	Snd1	chr6	28846906	28850906	K4me1 K27ac
ENSMUSG00000001436.15	Slc19a1	chr10	77030270	77034270	K4me3 K4me1 K27ac
ENSMUSG00000001440.5	Kpnb1	chr11	97163400	97167400	Unmarked
ENSMUSG00000001441.13	Npepps	chr11	97240783	97244783	Unmarked
ENSMUSG00000001445.10	Mrpl10	chr11	97039559	97043559	K4me3 K27ac
ENSMUSG00000001467.5	Cyp51	chr5	4102421	4106421	K4me3 K27ac
ENSMUSG00000001472.17	Tcf25	chr8	123395812	123399812	Unmarked
ENSMUSG00000001473.7	Tubb6	chr18	67390266	67394266	K4me3 K27ac
ENSMUSG00000001482.15	Def8	chr8	123421526	123425526	K4me1
ENSMUSG00000001493.9	Meox1	chr11	101892374	101896374	Repressed
ENSMUSG00000001504.10	Irx2	chr13	72627824	72631824	Bivalent
ENSMUSG00000001506.10	Col1a1	chr11	94934223	94938223	Repressed
ENSMUSG00000001507.16	Itga3	chr11	95074797	95078797	K4me3 K4me1 K27ac
ENSMUSG00000001517.14	Foxm1	chr6	128363704	128367704	Unmarked
ENSMUSG00000001518.12	Itfg2	chr6	128422912	128426912	K4me3 K27ac
ENSMUSG00000001520.12	Nrip2	chr6	128397295	128401295	K4me1 K27ac
ENSMUSG00000001521.12	Tulp3	chr6	128353851	128357851	K4me3 K27ac
ENSMUSG00000001524.14	Gtf2h4	chr17	35671298	35675298	Unmarked
ENSMUSG00000001525.10	Tubb5	chr17	35836306	35840306	K4me3 K4me1 K27ac
ENSMUSG00000001542.7	Ell2	chr13	75705584	75709584	K4me3 K27ac
ENSMUSG00000001552.14	Jup	chr11	100395749	100399749	K4me3 K4me1 K27ac
ENSMUSG00000001555.10	Fkbp10	chr11	100418423	100422423	Unmarked
ENSMUSG00000001558.5	Klhl10	chr11	100439926	100443926	K4me1
ENSMUSG00000001566.9	Mnx1	chr5	29476470	29480470	K4me3 K4me1 K27ac
ENSMUSG00000001569.10	Nom1	chr5	29432663	29436663	K4me3 K27ac
ENSMUSG00000001576.15	Ergic1	chr17	26605891	26609891	Unmarked
ENSMUSG00000001604.14	Tcea3	chr4	136245728	136249728	K4me3 K4me1
ENSMUSG00000001622.15	Csn3	chr5	87925810	87929810	Unmarked
ENSMUSG00000001627.12	Ifrd1	chr12	40221149	40225149	K4me3 K27ac
ENSMUSG00000001630.13	Stk38l	chr6	146722994	146726994	K4me3 K27ac
ENSMUSG00000001632.16	Brpf1	chr6	113305428	113309428	Bivalent
ENSMUSG00000001642.18	Akr1b3	chr6	34315430	34319430	K4me3 K27ac
ENSMUSG00000001665.11	Gstt3	chr10	75779050	75783050	K4me3 K4me1
ENSMUSG00000001666.8	Ddt	chr10	75771414	75775414	K4me3 K4me1
ENSMUSG00000001672.14	Marveld3	chr8	109960168	109964168	K4me3 K27ac
ENSMUSG00000001674.11	Ddx18	chr1	121565989	121569989	K4me3 K27ac
ENSMUSG00000001687.15	Ubl3	chr5	148550789	148554789	K4me3 K27ac
ENSMUSG00000001707.8	Eef1e1	chr13	38657058	38661058	Bivalent
ENSMUSG00000001729.14	Akt1	chr12	112654973	112658973	Unmarked
ENSMUSG00000001739.14	Cldn15	chr5	136965868	136969868	K4me1 K27ac
ENSMUSG00000001741.12	Il16	chr7	83653495	83657495	Unmarked
ENSMUSG00000001750.16	Tcirg1	chr19	3896853	3900853	Unmarked
ENSMUSG00000001751.9	Naglu	chr11	101069551	101073551	Unmarked
ENSMUSG00000001755.12	Coasy	chr11	101080617	101084617	Bivalent
ENSMUSG00000001761.7	Smo	chr6	29733693	29737693	K4me3 K27ac
ENSMUSG00000001763.14	Tspan33	chr6	29692221	29696221	K4me3 K4me1 K27ac
ENSMUSG00000001767.5	Crnkl1	chr2	145929391	145933391	Unmarked
ENSMUSG00000001768.16	Rin2	chr2	145784161	145788161	K4me3 K4me1
ENSMUSG00000001774.8	Chordc1	chr9	18290387	18294387	K4me3 K27ac
ENSMUSG00000001783.3	Rtcb	chr10	85955823	85959823	K4me3 K27ac
ENSMUSG00000001785.13	Pwp1	chr10	85869830	85873830	K4me3 K27ac
ENSMUSG00000001786.14	Fbxo7	chr10	86040451	86044451	Unmarked
ENSMUSG00000001794.13	Capns1	chr7	30196811	30200811	K4me1 K27ac
ENSMUSG00000001802.16	Lrp3	chr7	35201225	35205225	Unmarked
ENSMUSG00000001827.12	Folr1	chr7	101866667	101870667	K4me1
ENSMUSG00000001829.17	Clpb	chr7	101661774	101665774	K4me1
ENSMUSG00000001833.17	Sept7	chr9	25250647	25254647	K4me3 K27ac
ENSMUSG00000001844.10	Zdhhc4	chr5	143327202	143331202	K4me3 K27ac
ENSMUSG00000001847.14	Rac1	chr5	143516182	143520182	K4me1 K27ac
ENSMUSG00000001855.15	Nup214	chr2	32023294	32027294	Unmarked
ENSMUSG00000001870.16	Ltbp1	chr17	75308155	75312155	Unmarked
ENSMUSG00000001891.16	Ugp2	chr11	21321502	21325502	Unmarked
ENSMUSG00000001901.15	Kcnh6	chr11	106006172	106010172	K4me3 K4me1 K27ac
ENSMUSG00000001909.16	Trmt1	chr8	84687285	84691285	K4me3 K4me1 K27ac
ENSMUSG00000001910.5	Nacc1	chr8	84674995	84678995	Unmarked
ENSMUSG00000001911.16	Nfix	chr8	84798344	84802344	Bivalent
ENSMUSG00000001918.17	Slc1a5	chr7	16783665	16787665	Unmarked
ENSMUSG00000001930.17	Vwf	chr6	125550962	125554962	K4me1
ENSMUSG00000001942.8	Siae	chr9	37611669	37615669	K4me3 K27ac
ENSMUSG00000001943.8	Vsig2	chr9	37539271	37543271	Unmarked
ENSMUSG00000001946.14	Esam	chr9	37526780	37530780	Bivalent
ENSMUSG00000001948.10	Spa17	chr9	37611722	37615722	K4me3 K27ac
ENSMUSG00000001983.7	Taco1	chr11	106064060	106068060	K4me3 K27ac
ENSMUSG00000001985.9	Grik3	chr4	125488699	125492699	Bivalent
ENSMUSG00000001995.9	Sipa1l2	chr8	125567756	125571756	K4me3 K27ac
ENSMUSG00000001998.15	Ap4e1	chr2	127006751	127010751	K4me3 K27ac
ENSMUSG00000001999.15	Blvra	chr2	127068692	127072692	K4me3 K27ac
ENSMUSG00000002017.10	Fam98a	chr17	75549946	75553946	K4me3 K27ac
ENSMUSG00000002028.13	Kmt2a	chr9	44879296	44883296	K4me3 K27ac
ENSMUSG00000002031.13	Ift46	chr9	44771152	44775152	K4me3 K4me1 K27ac
ENSMUSG00000002032.17	Tmem25	chr9	44797206	44801206	K4me3 K27ac
ENSMUSG00000002043.17	Trappc6a	chr7	19506729	19510729	K4me3 K4me1 K27ac
ENSMUSG00000002052.6	Supt6	chr11	78221686	78225686	Unmarked
ENSMUSG00000002055.9	Spag5	chr11	78299528	78303528	K4me3 K27ac
ENSMUSG00000002057.4	Foxn1	chr11	78384558	78388558	Unmarked
ENSMUSG00000002058.13	Unc119	chr11	78341505	78345505	K4me3 K4me1 K27ac
ENSMUSG00000002064.10	Sdf2	chr11	78248420	78252420	K4me1
ENSMUSG00000002068.16	Ccne1	chr7	38104908	38108908	K4me3 K27ac
ENSMUSG00000002083.13	Bbc3	chr7	16311516	16315516	K4me3 K4me1 K27ac
ENSMUSG00000002102.15	Psmc3	chr2	91052477	91056477	K4me3 K27ac
ENSMUSG00000002103.16	Acp2	chr2	91200923	91204923	K4me3 K27ac
ENSMUSG00000002105.15	Slc39a13	chr2	91066871	91070871	K4me3 K27ac
ENSMUSG00000002107.18	Celf2	chr2	6882996	6886996	Unmarked
ENSMUSG00000002108.10	Nr1h3	chr2	91193035	91197035	K4me3 K4me1 K27ac
ENSMUSG00000002109.14	Ddb2	chr2	91234982	91238982	K4me3 K27ac
ENSMUSG00000002111.8	Spi1	chr2	91094779	91098779	Unmarked
ENSMUSG00000002129.11	Sf3a1	chr11	4158354	4162354	K4me3 K4me1 K27ac
ENSMUSG00000002190.13	Clgn	chr8	83387866	83391866	Bivalent
ENSMUSG00000002205.16	Vrk3	chr7	44754985	44758985	Unmarked
ENSMUSG00000002210.11	Smg9	chr7	24397618	24401618	K4me3 K27ac
ENSMUSG00000002221.11	Paxip1	chr5	27789691	27793691	K4me3 K4me1 K27ac
ENSMUSG00000002222.14	Rmnd5a	chr6	71395198	71399198	Unmarked
ENSMUSG00000002227.15	Mov10	chr3	104816116	104820116	K4me3 K4me1 K27ac
ENSMUSG00000002228.7	Ppm1j	chr3	104783608	104787608	Repressed
ENSMUSG00000002233.13	Rhoc	chr3	104787033	104791033	K4me3 K27ac
ENSMUSG00000002249.21	Tead3	chr17	28333415	28337415	K4me1
ENSMUSG00000002250.16	Ppard	chr17	28230773	28234773	K4me3 K27ac
ENSMUSG00000002257.8	Def6	chr17	28205802	28209802	K4me1 K27ac
ENSMUSG00000002279.19	Lmf1	chr17	25577186	25581186	K4me3 K27ac
ENSMUSG00000002280.11	Ciao3	chr17	25771816	25775816	K4me1
ENSMUSG00000002289.16	Angptl4	chr17	33776465	33780465	K4me1
ENSMUSG00000002297.16	Dbf4	chr5	8401191	8405191	Unmarked
ENSMUSG00000002307.16	Daxx	chr17	33908276	33912276	K4me3 K4me1 K27ac
ENSMUSG00000002319.16	Ipo4	chr14	55624417	55628417	Unmarked
ENSMUSG00000002320.15	Tm9sf1	chr14	55641771	55645771	K4me3 K4me1 K27ac
ENSMUSG00000002325.15	Irf9	chr14	55602578	55606578	K4me3 K4me1 K27ac
ENSMUSG00000002326.6	Gmpr2	chr14	55669940	55673940	K4me3 K4me1 K27ac
ENSMUSG00000002329.7	Mdp1	chr14	55658508	55662508	K4me3 K4me1
ENSMUSG00000002332.16	Dhrs1	chr14	55743599	55747599	K4me3 K27ac
ENSMUSG00000002342.17	Tmem161a	chr8	70170407	70174407	K4me3 K27ac
ENSMUSG00000002343.11	Armc6	chr8	70223177	70227177	Unmarked
ENSMUSG00000002345.18	Borcs8	chr8	70137706	70141706	K4me3 K4me1 K27ac
ENSMUSG00000002346.16	Slc25a42	chr8	70210305	70214305	K4me3 K4me1 K27ac
ENSMUSG00000002365.10	Snx9	chr17	5839351	5843351	K4me3 K27ac
ENSMUSG00000002372.9	Ranbp3	chr17	56671380	56675380	K4me3 K4me1 K27ac
ENSMUSG00000002393.14	Nr2f6	chr8	71379090	71383090	K4me3 K4me1 K27ac
ENSMUSG00000002395.14	Use1	chr8	71364941	71368941	K4me3 K27ac
ENSMUSG00000002396.8	Ocel1	chr8	71369297	71373297	K4me3 K27ac
ENSMUSG00000002409.18	Dyrk1b	chr7	28177493	28181493	K4me3 K27ac
ENSMUSG00000002413.15	Braf	chr6	39723193	39727193	K4me3 K27ac
ENSMUSG00000002416.13	Ndufb2	chr6	39590587	39594587	K4me3 K27ac
ENSMUSG00000002428.12	Hltf	chr3	20055810	20059810	K4me3 K4me1
ENSMUSG00000002455.14	Prpf6	chr2	181599372	181603372	K4me3 K27ac
ENSMUSG00000002458.13	Rgs19	chr2	181691810	181695810	K4me3 K27ac
ENSMUSG00000002459.17	Rgs20	chr1	5017539	5021539	Bivalent
ENSMUSG00000002475.16	Abhd3	chr18	10704771	10708771	K4me3 K27ac
ENSMUSG00000002477.5	Snrpd1	chr18	10615795	10619795	K4me3 K27ac
ENSMUSG00000002486.15	Tchp	chr5	114712634	114716634	Unmarked
ENSMUSG00000002496.10	Tsc2	chr17	24595058	24599058	K4me1 K27ac
ENSMUSG00000002504.15	Slc9a3r2	chr17	24642957	24646957	K4me1
ENSMUSG00000002524.17	Puf60	chr15	76078882	76082882	K4me3 K4me1 K27ac
ENSMUSG00000002546.16	Golga2	chr2	32286350	32290350	K4me3 K27ac
ENSMUSG00000002550.16	Uck1	chr2	32254669	32258669	Unmarked
ENSMUSG00000002565.16	Scin	chr12	40132228	40136228	Bivalent
ENSMUSG00000002578.18	Ikzf4	chr10	128667358	128671358	K4me3 K27ac
ENSMUSG00000002580.7	Mien1	chr11	98436991	98440991	K4me1
ENSMUSG00000002602.16	Axl	chr7	25762413	25766413	Unmarked
ENSMUSG00000002603.15	Tgfb1	chr7	25686889	25690889	Bivalent
ENSMUSG00000002608.8	Ccdc97	chr7	25717006	25721006	K4me3 K4me1 K27ac
ENSMUSG00000002617.14	Zfp40	chr17	23191210	23195210	K4me3 K27ac
ENSMUSG00000002625.10	Akap8l	chr17	32331481	32335481	Unmarked
ENSMUSG00000002635.11	Pdcd2l	chr7	34194608	34198608	K4me3 K27ac
ENSMUSG00000002658.9	Gtf2f1	chr17	57009288	57013288	K4me3 K27ac
ENSMUSG00000002660.8	Clpp	chr17	56988304	56992304	K4me3 K27ac
ENSMUSG00000002661.14	Alkbh7	chr17	56995342	56999342	K4me1
ENSMUSG00000002668.8	Dennd1c	chr17	57072150	57076150	Unmarked
ENSMUSG00000002679.14	Med6	chr12	81593008	81597008	Unmarked
ENSMUSG00000002688.8	Prkd1	chr12	50647098	50651098	K4me3 K27ac
ENSMUSG00000002699.13	Lcp2	chr11	34076176	34080176	Unmarked
ENSMUSG00000002718.14	Cse1l	chr2	166925564	166929564	Unmarked
ENSMUSG00000002728.14	Naa20	chr2	145909899	145913899	Unmarked
ENSMUSG00000002731.6	Prkra	chr2	76638733	76642733	Unmarked
ENSMUSG00000002732.14	Fkbp7	chr2	76671116	76675116	K4me3 K4me1
ENSMUSG00000002733.8	Plekha3	chr2	76673280	76677280	K4me3 K4me1 K27ac
ENSMUSG00000002741.9	Ykt6	chr11	5957303	5961303	K4me1
ENSMUSG00000002748.7	Baz1b	chr5	135185263	135189263	K4me3 K4me1 K27ac
ENSMUSG00000002763.16	Pex6	chr17	46709462	46713462	K4me3 K27ac
ENSMUSG00000002767.13	Mrpl2	chr17	46644242	46648242	K4me3 K4me1 K27ac
ENSMUSG00000002768.8	Mea1	chr17	46678694	46682694	K4me3 K4me1 K27ac
ENSMUSG00000002769.9	Gnmt	chr17	46724801	46728801	Unmarked
ENSMUSG00000002778.14	Kdelr1	chr7	45870886	45874886	Repressed
ENSMUSG00000002781.19	Tmem143	chr7	45895083	45899083	K4me3 K4me1 K27ac
ENSMUSG00000002797.9	Ggct	chr6	54990863	54994863	K4me3 K4me1
ENSMUSG00000002803.14	Btbd6	chr12	112974481	112978481	K4me3 K27ac
ENSMUSG00000002804.4	Nudt14	chr12	112940117	112944117	K4me3 K27ac
ENSMUSG00000002812.4	Flii	chr11	60725223	60729223	K4me3 K4me1 K27ac
ENSMUSG00000002814.15	Top3a	chr11	60775265	60779265	K4me3 K4me1 K27ac
ENSMUSG00000002820.6	Atg4d	chr9	21263292	21267292	K4me3 K27ac
ENSMUSG00000002825.8	Qtrt1	chr9	21409901	21413901	K4me3 K27ac
ENSMUSG00000002833.11	Hdgfl2	chr17	56096980	56100980	Unmarked
ENSMUSG00000002835.9	Chaf1a	chr17	56055742	56059742	Unmarked
ENSMUSG00000002844.9	Adprh	chr16	38450682	38454682	K4me3 K4me1 K27ac
ENSMUSG00000002845.14	Tmem39a	chr16	38562188	38566188	K4me3 K27ac
ENSMUSG00000002846.9	Timmdc1	chr16	38520641	38524641	K4me3 K27ac
ENSMUSG00000002847.7	Pla1a	chr16	38431145	38435145	K4me1
ENSMUSG00000002870.8	Mcm2	chr6	88891185	88895185	Unmarked
ENSMUSG00000002871.14	Tpra1	chr6	88905988	88909988	K4me1
ENSMUSG00000002881.14	Nab1	chr1	52498315	52502315	K4me3 K27ac
ENSMUSG00000002897.5	Il17ra	chr6	120461246	120465246	Repressed
ENSMUSG00000002910.11	Arrdc2	chr8	70834587	70838587	Unmarked
ENSMUSG00000002944.15	Cd36	chr5	17847729	17851729	Unmarked
ENSMUSG00000002948.19	Map2k7	chr8	4244672	4248672	K4me1 K27ac
ENSMUSG00000002949.15	Timm44	chr8	4264982	4268982	Unmarked
ENSMUSG00000002957.11	Ap2a2	chr7	141560207	141564207	K4me3 K4me1 K27ac
ENSMUSG00000002963.17	Pnkp	chr7	44855347	44859347	K4me1
ENSMUSG00000002968.9	Med25	chr7	44881184	44885184	Unmarked
ENSMUSG00000002980.14	Bcam	chr7	19768495	19772495	K4me3 K4me1 K27ac
ENSMUSG00000002981.10	Clptm1	chr7	19662955	19666955	K4me3 K27ac
ENSMUSG00000002983.17	Relb	chr7	19627438	19631438	K4me3 K27ac
ENSMUSG00000002984.17	Tomm40	chr7	19701577	19705577	Unmarked
ENSMUSG00000002985.16	Apoe	chr7	19696621	19700621	K4me3 K4me1
ENSMUSG00000002996.17	Hbp1	chr12	31948210	31952210	K4me3 K27ac
ENSMUSG00000002997.15	Prkar2b	chr12	32059235	32063235	K4me3 K27ac
ENSMUSG00000003031.14	Cdkn1b	chr6	134918400	134922400	K4me3 K27ac
ENSMUSG00000003032.8	Klf4	chr4	55530466	55534466	K4me3 K4me1 K27ac
ENSMUSG00000003033.15	Ap1m1	chr8	72238322	72242322	K4me3 K27ac
ENSMUSG00000003037.16	Rab8a	chr8	72159199	72163199	K4me3 K27ac
ENSMUSG00000003038.15	Hmgn2	chr4	133965251	133969251	K4me3 K4me1 K27ac
ENSMUSG00000003039.9	Fam32a	chr8	72217729	72221729	K4me3 K27ac
ENSMUSG00000003051.13	Elf3	chr1	135256438	135260438	K4me3 K4me1 K27ac
ENSMUSG00000003062.13	Stard3nl	chr13	19357125	19361125	Unmarked
ENSMUSG00000003068.16	Stk11	chr10	80123374	80127374	K4me1
ENSMUSG00000003099.11	Ppp5c	chr7	17005083	17009083	Unmarked
ENSMUSG00000003119.14	Cdk12	chr11	98201313	98205313	K4me3 K27ac
ENSMUSG00000003123.15	Lipe	chr7	25388477	25392477	K4me1 K27ac
ENSMUSG00000003131.7	Pafah1b2	chr9	45982827	45986827	K4me3 K4me1 K27ac
ENSMUSG00000003134.10	Tbc1d8	chr1	39476755	39480755	K4me3 K4me1 K27ac
ENSMUSG00000003135.15	Cnot11	chr1	39533801	39537801	K4me3 K27ac
ENSMUSG00000003153.10	Slc2a3	chr6	122777957	122781957	K4me1
ENSMUSG00000003154.15	Foxj2	chr6	122824674	122828674	K4me3 K4me1 K27ac
ENSMUSG00000003161.15	Sri	chr5	8057341	8061341	Unmarked
ENSMUSG00000003166.20	Dgcr2	chr16	17889660	17893660	K4me3 K27ac
ENSMUSG00000003184.15	Irf3	chr7	44996325	45000325	K4me3 K4me1 K27ac
ENSMUSG00000003190.12	Bcl2l12	chr7	44995545	44999545	K4me3 K4me1 K27ac
ENSMUSG00000003198.10	Zfp959	chr17	55890467	55894467	K4me3 K4me1
ENSMUSG00000003199.16	Mpnd	chr17	56009942	56013942	K4me1
ENSMUSG00000003200.10	Sh3gl1	chr17	56034576	56038576	K4me3 K4me1 K27ac
ENSMUSG00000003206.7	Ebi3	chr17	55950639	55954639	Unmarked
ENSMUSG00000003208.9	Yju2	chr17	55957173	55961173	K4me3 K27ac
ENSMUSG00000003226.7	Ranbp2	chr10	58445194	58449194	K4me3 K27ac
ENSMUSG00000003228.9	Grk5	chr19	60887748	60891748	K4me3 K27ac
ENSMUSG00000003233.12	Dvl3	chr16	20514981	20518981	K4me3 K4me1 K27ac
ENSMUSG00000003234.16	Abcf3	chr16	20549660	20553660	Unmarked
ENSMUSG00000003235.13	Eif2b5	chr16	20502762	20506762	Bivalent
ENSMUSG00000003269.17	Cyth2	chr7	45812581	45816581	K4me3 K27ac
ENSMUSG00000003271.17	Sult2b1	chr7	45740746	45744746	Unmarked
ENSMUSG00000003273.14	Car11	chr7	45697842	45701842	Bivalent
ENSMUSG00000003279.17	Dlgap1	chr17	69967401	69971401	Bivalent
ENSMUSG00000003282.9	Plag1	chr4	3936382	3940382	K4me3 K4me1 K27ac
ENSMUSG00000003283.14	Hck	chr2	153106467	153110467	Bivalent
ENSMUSG00000003299.10	Mrpl4	chr9	21001383	21005383	K4me3 K27ac
ENSMUSG00000003308.15	Keap1	chr9	21236813	21240813	K4me3 K4me1 K27ac
ENSMUSG00000003309.14	Ap1m2	chr9	21310311	21314311	K4me3 K4me1 K27ac
ENSMUSG00000003316.14	Glg1	chr8	111257216	111261216	K4me3 K27ac
ENSMUSG00000003344.14	Btbd2	chr10	80654494	80658494	K4me3 K27ac
ENSMUSG00000003345.16	Csnk1g2	chr10	80627655	80631655	K4me1 K27ac
ENSMUSG00000003346.14	Abhd17a	chr10	80584624	80588624	K4me1 K27ac
ENSMUSG00000003348.10	Mob3a	chr10	80699828	80703828	K4me3 K4me1 K27ac
ENSMUSG00000003352.14	Cacnb3	chr15	98630380	98634380	K4me3 K4me1
ENSMUSG00000003354.6	Ccdc65	chr15	98706230	98710230	Repressed
ENSMUSG00000003360.15	Ddx23	chr15	98660881	98664881	K4me3 K27ac
ENSMUSG00000003363.15	Pld3	chr7	27551151	27555151	K4me3 K27ac
ENSMUSG00000003378.9	Grik5	chr7	25058994	25062994	Unmarked
ENSMUSG00000003379.7	Cd79a	chr7	24895380	24899380	Unmarked
ENSMUSG00000003380.11	Rabac1	chr7	24970754	24974754	K4me3 K27ac
ENSMUSG00000003382.18	Etv3	chr3	87523606	87527606	K4me3 K27ac
ENSMUSG00000003402.14	Prkcsh	chr9	22001017	22005017	K4me3 K4me1
ENSMUSG00000003410.8	Elavl3	chr9	22050023	22054023	Bivalent
ENSMUSG00000003418.11	St8sia6	chr2	13792064	13796064	Bivalent
ENSMUSG00000003420.8	Fcgrt	chr7	45101744	45105744	K4me1
ENSMUSG00000003421.13	Nosip	chr7	45073710	45077710	K4me1
ENSMUSG00000003423.15	Pih1d1	chr7	45153986	45157986	K4me3 K27ac
ENSMUSG00000003429.11	Rps11	chr7	45122439	45126439	K4me3 K4me1 K27ac
ENSMUSG00000003435.9	Supt5	chr7	28329454	28333454	Unmarked
ENSMUSG00000003437.14	Paf1	chr7	28391040	28395040	K4me3 K27ac
ENSMUSG00000003438.17	Timm50	chr7	28306018	28310018	K4me1 K27ac
ENSMUSG00000003444.8	Med29	chr7	28390708	28394708	K4me3 K27ac
ENSMUSG00000003452.15	Bicd1	chr6	149511829	149515829	Unmarked
ENSMUSG00000003458.12	Ncstn	chr1	172080795	172084795	K4me3 K27ac
ENSMUSG00000003464.13	Pex19	chr1	172131959	172135959	Bivalent
ENSMUSG00000003469.9	Phyhip	chr14	70455475	70459475	K4me3 K4me1 K27ac
ENSMUSG00000003476.16	Crhr2	chr6	55130960	55134960	K4me1
ENSMUSG00000003477.5	Inmt	chr6	55173043	55177043	K4me1 K27ac
ENSMUSG00000003484.4	Cyp4f18	chr8	71990915	71994915	Unmarked
ENSMUSG00000003500.13	Impdh1	chr6	29214364	29218364	Bivalent
ENSMUSG00000003518.13	Dusp3	chr11	101982778	101986778	K4me3 K4me1 K27ac
ENSMUSG00000003526.12	Prodh	chr16	18087163	18091163	K4me1
ENSMUSG00000003527.9	Ess2	chr16	17909348	17913348	Repressed
ENSMUSG00000003528.15	Slc25a1	chr16	17925416	17929416	K4me3 K27ac
ENSMUSG00000003531.15	Dgcr6	chr16	18050891	18054891	Unmarked
ENSMUSG00000003541.6	Ier3	chr17	35819683	35823683	K4me3 K27ac
ENSMUSG00000003545.3	Fosb	chr7	19308051	19312051	K4me3 K4me1 K27ac
ENSMUSG00000003546.10	Klc4	chr17	46643144	46647144	K4me3 K4me1 K27ac
ENSMUSG00000003549.9	Ercc1	chr7	19343106	19347106	K4me3 K27ac
ENSMUSG00000003573.15	Homer3	chr8	70280826	70284826	K4me3 K4me1 K27ac
ENSMUSG00000003575.13	Crtc1	chr8	70437575	70441575	K4me3 K4me1 K27ac
ENSMUSG00000003581.14	Rnf215	chr11	4133501	4137501	K4me3 K27ac
ENSMUSG00000003585.13	Sec14l2	chr11	4116753	4120753	K4me3 K4me1
ENSMUSG00000003604.14	Aven	chr2	112557281	112561281	K4me1
ENSMUSG00000003617.16	Cp	chr3	19968884	19972884	Unmarked
ENSMUSG00000003623.4	Crot	chr5	8995324	8999324	K4me3 K27ac
ENSMUSG00000003644.17	Rps6ka1	chr4	133885784	133889784	K4me3 K4me1 K27ac
ENSMUSG00000003660.10	Snrnp200	chr2	127206385	127210385	K4me3 K27ac
ENSMUSG00000003662.10	Ciao1	chr2	127244046	127248046	K4me3 K27ac
ENSMUSG00000003665.7	Has1	chr17	17853188	17857188	Unmarked
ENSMUSG00000003680.16	Taf6l	chr19	8784257	8788257	Unmarked
ENSMUSG00000003721.14	Insig2	chr1	121325793	121329793	K4me3 K27ac
ENSMUSG00000003731.13	Kpna6	chr4	129670767	129674767	K4me3 K27ac
ENSMUSG00000003746.16	Man1a	chr10	54073736	54077736	K4me3 K27ac
ENSMUSG00000003752.9	Itpkc	chr7	27212454	27216454	Unmarked
ENSMUSG00000003762.13	Coq8b	chr7	27248384	27252384	K4me1
ENSMUSG00000003778.14	Brd8	chr18	34622601	34626601	K4me3 K27ac
ENSMUSG00000003779.16	Kif20a	chr18	34622612	34626612	K4me3 K27ac
ENSMUSG00000003808.18	Farsa	chr8	84865562	84869562	Unmarked
ENSMUSG00000003809.14	Gcdh	chr8	84890666	84894666	K4me3 K4me1
ENSMUSG00000003810.13	Mast2	chr4	116308648	116312648	Unmarked
ENSMUSG00000003812.13	Dnase2a	chr8	84906720	84910720	K4me3 K4me1
ENSMUSG00000003813.15	Rad23a	chr8	84838665	84842665	K4me3 K27ac
ENSMUSG00000003814.8	Calr	chr8	84844830	84848830	K4me3 K4me1 K27ac
ENSMUSG00000003824.12	Syce2	chr8	84870437	84874437	K4me3 K4me1 K27ac
ENSMUSG00000003847.16	Nfat5	chr8	107291508	107295508	K4me3 K27ac
ENSMUSG00000003848.14	Nob1	chr8	107423049	107427049	K4me3 K27ac
ENSMUSG00000003849.8	Nqo1	chr8	107401206	107405206	K4me1 K27ac
ENSMUSG00000003863.18	Ppfia3	chr7	45358113	45362113	Bivalent
ENSMUSG00000003868.14	Ruvbl2	chr7	45429373	45433373	Unmarked
ENSMUSG00000003872.9	Lin7b	chr7	45368185	45372185	K4me1 K27ac
ENSMUSG00000003873.11	Bax	chr7	45464775	45468775	K4me3 K4me1 K27ac
ENSMUSG00000003923.14	Tfam	chr10	71235042	71239042	K4me3 K27ac
ENSMUSG00000003929.11	Zfp81	chr17	33356868	33360868	K4me3 K27ac
ENSMUSG00000003934.5	Efnb3	chr11	69558205	69562205	K4me1 K27ac
ENSMUSG00000003948.17	Mmd	chr11	90247475	90251475	K4me3 K4me1
ENSMUSG00000003949.16	Hlf	chr11	90386207	90390207	Bivalent
ENSMUSG00000003955.8	Fam162a	chr16	36050394	36054394	Unmarked
ENSMUSG00000003970.9	Rpl8	chr15	76902302	76906302	K4me3 K4me1 K27ac
ENSMUSG00000003992.15	Ssbp2	chr13	91459169	91463169	K4me3 K27ac
ENSMUSG00000004018.9	Fancl	chr11	26385201	26389201	Unmarked
ENSMUSG00000004031.13	Brinp2	chr1	158354229	158358229	Bivalent
ENSMUSG00000004032.10	Gstm5	chr3	107893953	107897953	K4me3 K4me1
ENSMUSG00000004040.16	Stat3	chr11	100906224	100910224	Unmarked
ENSMUSG00000004043.14	Stat5a	chr11	100877018	100881018	Unmarked
ENSMUSG00000004044.9	Cavin1	chr11	100968551	100972551	Bivalent
ENSMUSG00000004054.9	Map3k11	chr19	5686741	5690741	K4me3 K4me1 K27ac
ENSMUSG00000004056.15	Akt2	chr7	27589745	27593745	K4me3 K4me1 K27ac
ENSMUSG00000004069.17	Dnaja3	chr16	4682069	4686069	K4me3 K27ac
ENSMUSG00000004070.15	Hmox2	chr16	4754993	4758993	K4me1
ENSMUSG00000004071.13	Cdip1	chr16	4787930	4791930	K4me3 K27ac
ENSMUSG00000004085.14	Map3k20	chr2	72295900	72299900	Unmarked
ENSMUSG00000004096.9	Cwc15	chr9	14498885	14502885	K4me3 K27ac
ENSMUSG00000004098.7	Col5a3	chr9	20813067	20817067	Repressed
ENSMUSG00000004099.16	Dnmt1	chr9	20906979	20910979	Unmarked
ENSMUSG00000004100.12	Ppan	chr9	20886264	20890264	K4me3 K27ac
ENSMUSG00000004110.17	Cacna1e	chr1	154724356	154728356	Bivalent
ENSMUSG00000004113.18	Cacna1b	chr2	24761152	24765152	Bivalent
ENSMUSG00000004127.12	Trmt10a	chr3	138141909	138145909	K4me3 K27ac
ENSMUSG00000004187.11	Kifc2	chr15	76658698	76662698	K4me3 K27ac
ENSMUSG00000004207.14	Psap	chr10	60275626	60279626	K4me3 K27ac
ENSMUSG00000004233.14	Wars2	chr3	99139071	99143071	K4me3 K27ac
ENSMUSG00000004263.15	Atn1	chr6	124754524	124758524	K4me3 K4me1 K27ac
ENSMUSG00000004264.17	Phb2	chr6	124710335	124714335	K4me3 K27ac
ENSMUSG00000004266.15	Ptpn6	chr6	124731110	124735110	K4me1
ENSMUSG00000004268.11	Emg1	chr6	124710069	124714069	K4me3 K27ac
ENSMUSG00000004270.13	Lpcat3	chr6	124661171	124665171	K4me3 K27ac
ENSMUSG00000004285.12	Atp6v1f	chr6	29465717	29469717	K4me3 K27ac
ENSMUSG00000004319.15	Clcn3	chr8	60952779	60956779	K4me1
ENSMUSG00000004328.15	Hif3a	chr7	17060384	17064384	K4me1 K27ac
ENSMUSG00000004356.8	Utp20	chr10	88763672	88767672	Unmarked
ENSMUSG00000004359.16	Spic	chr10	88681023	88685023	K4me1
ENSMUSG00000004360.9	9330159F19Rik	chr10	29209605	29213605	K4me1 K27ac
ENSMUSG00000004364.14	Cul3	chr1	80338311	80342311	K4me3 K27ac
ENSMUSG00000004371.15	Il11	chr7	4776141	4780141	K4me3 K4me1 K27ac
ENSMUSG00000004383.18	Large1	chr8	73096913	73100913	K4me1
ENSMUSG00000004393.10	Ddx56	chr11	6265746	6269746	K4me3 K27ac
ENSMUSG00000004394.12	Tmed4	chr11	6272865	6276865	K4me3 K4me1 K27ac
ENSMUSG00000004415.15	Col26a1	chr5	136742549	136746549	Unmarked
ENSMUSG00000004446.12	Bid	chr6	120914798	120918798	K4me3 K27ac
ENSMUSG00000004451.14	Ralb	chr1	119502794	119506794	K4me3 K27ac
ENSMUSG00000004455.16	Ppp1cc	chr5	122170731	122174731	K4me1 K27ac
ENSMUSG00000004460.17	Dnajb11	chr16	22867426	22871426	Unmarked
ENSMUSG00000004462.7	Tbccd1	chr16	22842643	22846643	K4me3 K4me1
ENSMUSG00000004473.10	Clec11a	chr7	44304902	44308902	K4me1
ENSMUSG00000004500.9	Zfp324	chr7	12963844	12967844	K4me3 K27ac
ENSMUSG00000004508.6	Gab2	chr7	97079775	97083775	K4me3 K4me1 K27ac
ENSMUSG00000004530.12	Coro1c	chr5	113906758	113910758	K4me3 K4me1 K27ac
ENSMUSG00000004535.12	Tax1bp1	chr6	52712349	52716349	K4me3 K27ac
ENSMUSG00000004558.15	Ndrg2	chr14	51910845	51914845	K4me3 K4me1
ENSMUSG00000004561.14	Mettl17	chr14	51882953	51886953	K4me3 K27ac
ENSMUSG00000004562.16	Arhgef40	chr14	51982911	51986911	K4me3 K4me1
ENSMUSG00000004565.15	Pnpla6	chr8	3513383	3517383	K4me3 K27ac
ENSMUSG00000004567.16	Mcoln1	chr8	3503778	3507778	Unmarked
ENSMUSG00000004568.13	Arhgef18	chr8	3424699	3428699	K4me1 K27ac
ENSMUSG00000004591.16	Pkn2	chr3	142879915	142883915	K4me3 K27ac
ENSMUSG00000004609.11	Cd33	chr7	43530678	43534678	Unmarked
ENSMUSG00000004610.4	Etfb	chr7	43442082	43446082	K4me3 K4me1 K27ac
ENSMUSG00000004626.14	Stxbp2	chr8	3637573	3641573	Unmarked
ENSMUSG00000004631.15	Sgce	chr6	4745157	4749157	Bivalent
ENSMUSG00000004633.17	Chn2	chr6	54270907	54274907	Unmarked
ENSMUSG00000004637.15	Wwox	chr8	114606435	114610435	Unmarked
ENSMUSG00000004642.13	Slbp	chr5	33640162	33644162	K4me1
ENSMUSG00000004655.5	Aqp1	chr6	55334431	55338431	K4me1
ENSMUSG00000004661.15	Arid3b	chr9	57832236	57836236	K4me1
ENSMUSG00000004667.18	Polr2e	chr10	80037795	80041795	K4me3 K27ac
ENSMUSG00000004677.17	Myo9b	chr8	71331816	71335816	Unmarked
ENSMUSG00000004730.15	Adgre1	chr17	57356698	57360698	Unmarked
ENSMUSG00000004748.5	Mtfp1	chr11	4093140	4097140	K4me3 K4me1 K27ac
ENSMUSG00000004768.14	Rab23	chr1	33732527	33736527	K4me1
ENSMUSG00000004771.12	Rab11a	chr9	64735742	64739742	K4me3 K27ac
ENSMUSG00000004788.11	Eif2b2	chr12	85217545	85221545	K4me3 K27ac
ENSMUSG00000004789.10	Dlst	chr12	85126081	85130081	K4me1
ENSMUSG00000004798.14	Ulk2	chr11	61852502	61856502	K4me3 K27ac
ENSMUSG00000004815.12	Dgkq	chr5	108651648	108655648	Unmarked
ENSMUSG00000004821.1	Tmed11	chr5	108793363	108797363	Unmarked
ENSMUSG00000004837.2	Grap	chr11	61667045	61671045	K4me1
ENSMUSG00000004843.7	Chmp2b	chr16	65560726	65564726	K4me3 K4me1
ENSMUSG00000004846.10	Plod3	chr5	136989623	136993623	Unmarked
ENSMUSG00000004849.14	Ap1s1	chr5	137035650	137039650	Unmarked
ENSMUSG00000004865.16	Srpk1	chr17	28620451	28624451	K4me3 K27ac
ENSMUSG00000004880.11	Lbr	chr1	181818542	181822542	Unmarked
ENSMUSG00000004891.16	Nes	chr3	87969077	87973077	Bivalent
ENSMUSG00000004895.9	Prcc	chr3	87883608	87887608	K4me3 K27ac
ENSMUSG00000004896.16	Rrnad1	chr3	87928138	87932138	K4me3 K27ac
ENSMUSG00000004897.16	Hdgf	chr3	87908033	87912033	K4me3 K4me1 K27ac
ENSMUSG00000004902.7	Slc25a18	chr6	120771577	120775577	K4me1 K27ac
ENSMUSG00000004929.12	Thop1	chr10	81068158	81072158	K4me1
ENSMUSG00000004931.11	Apba3	chr10	81270746	81274746	Unmarked
ENSMUSG00000004933.17	Matk	chr10	81255298	81259298	Bivalent
ENSMUSG00000004934.14	Pias4	chr10	81156011	81160011	Unmarked
ENSMUSG00000004936.8	Map2k1	chr9	64251631	64255631	K4me3 K27ac
ENSMUSG00000004937.6	Sgta	chr10	81058144	81062144	K4me3 K4me1 K27ac
ENSMUSG00000004945.15	Tmem242	chr17	5438256	5442256	K4me3 K4me1 K27ac
ENSMUSG00000004947.15	Dtx2	chr5	135992881	135996881	K4me3 K27ac
ENSMUSG00000004951.10	Hspb1	chr5	135886017	135890017	Bivalent
ENSMUSG00000004952.13	Rasa4	chr5	136082031	136086031	Bivalent
ENSMUSG00000004961.7	Syt5	chr7	4544567	4548567	K4me3 K4me1 K27ac
ENSMUSG00000004980.16	Hnrnpa2b1	chr6	51467845	51471845	K4me3 K27ac
ENSMUSG00000004994.12	Ccdc130	chr8	84260145	84264145	Unmarked
ENSMUSG00000004996.9	Mri1	chr8	84255324	84259324	K4me3 K4me1 K27ac
ENSMUSG00000005034.15	Prkacb	chr3	146768261	146772261	K4me3 K4me1 K27ac
ENSMUSG00000005043.13	Sgsh	chr11	119353536	119357536	K4me1
ENSMUSG00000005045.16	Chd5	chr4	152370141	152374141	Unmarked
ENSMUSG00000005054.7	Cstb	chr10	78423668	78427668	K4me3 K4me1 K27ac
ENSMUSG00000005057.13	Sh2b2	chr5	136242854	136246854	K4me3 K4me1
ENSMUSG00000005069.12	Pex5	chr6	124413067	124417067	K4me3 K4me1 K27ac
ENSMUSG00000005078.16	Jkamp	chr12	72083788	72087788	K4me3 K4me1 K27ac
ENSMUSG00000005102.13	Eif2ak4	chr2	118386846	118390846	K4me3 K4me1 K27ac
ENSMUSG00000005103.12	Wdr1	chr5	38559806	38563806	K4me3 K27ac
ENSMUSG00000005107.13	Slc2a9	chr5	38500152	38504152	Unmarked
ENSMUSG00000005124.10	Ccn4	chr15	66907263	66911263	K4me1
ENSMUSG00000005125.13	Ndrg1	chr15	66967640	66971640	K4me3 K27ac
ENSMUSG00000005131.4	4930550C14Rik	chr9	53403285	53407285	K4me1
ENSMUSG00000005142.10	Man2b1	chr8	85081303	85085303	K4me1
ENSMUSG00000005150.16	Wdr83	chr8	85074291	85078291	Unmarked
ENSMUSG00000005161.15	Prdx2	chr8	84967693	84971693	K4me3 K27ac
ENSMUSG00000005198.15	Polr2a	chr11	69740571	69744571	Unmarked
ENSMUSG00000005204.12	Senp3	chr11	69676013	69680013	K4me1
ENSMUSG00000005220.10	Corin	chr5	72378288	72382288	Unmarked
ENSMUSG00000005225.15	Plekha8	chr6	54601146	54605146	Unmarked
ENSMUSG00000005232.11	G6pc2	chr2	69209072	69213072	Unmarked
ENSMUSG00000005233.16	Spc25	chr2	69204123	69208123	K4me3 K27ac
ENSMUSG00000005237.14	Dnah2	chr11	69514755	69518755	Unmarked
ENSMUSG00000005251.15	Ripk4	chr16	97761787	97765787	K4me3 K4me1 K27ac
ENSMUSG00000005262.13	Ufd1	chr16	18810293	18814293	K4me3 K27ac
ENSMUSG00000005267.13	Zfp287	chr11	62726671	62730671	Unmarked
ENSMUSG00000005268.20	Prlr	chr15	10221985	10225985	Unmarked
ENSMUSG00000005299.6	Letm1	chr5	33780817	33784817	K4me3 K4me1 K27ac
ENSMUSG00000005312.15	Ubqln1	chr13	58213653	58217653	K4me3 K4me1 K27ac
ENSMUSG00000005320.9	Fgfr4	chr13	55150639	55154639	K4me3 K4me1 K27ac
ENSMUSG00000005338.13	Cadm3	chr1	173365633	173369633	Bivalent
ENSMUSG00000005354.16	Txn2	chr15	77926974	77930974	K4me3 K27ac
ENSMUSG00000005362.14	Crbn	chr6	106798077	106802077	K4me3 K27ac
ENSMUSG00000005370.4	Msh6	chr17	87977702	87981702	Unmarked
ENSMUSG00000005371.15	Fbxo11	chr17	88063243	88067243	K4me3 K27ac
ENSMUSG00000005374.13	Tbl2	chr5	135147690	135151690	K4me3 K27ac
ENSMUSG00000005378.17	Bud23	chr5	135061764	135065764	K4me3 K4me1 K27ac
ENSMUSG00000005397.8	Nid1	chr13	13435666	13439666	Unmarked
ENSMUSG00000005410.6	Mcm5	chr8	75107568	75111568	K4me3 K27ac
ENSMUSG00000005413.8	Hmox1	chr8	75091620	75095620	Unmarked
ENSMUSG00000005417.17	Mprip	chr11	59758747	59762747	Unmarked
ENSMUSG00000005442.13	Cic	chr7	25281216	25285216	K4me3 K4me1 K27ac
ENSMUSG00000005447.12	Pafah1b3	chr7	25295986	25299986	K4me3 K4me1 K27ac
ENSMUSG00000005465.9	Il27ra	chr8	84040540	84044540	Bivalent
ENSMUSG00000005469.10	Prkaca	chr8	83974882	83978882	K4me1 K27ac
ENSMUSG00000005470.8	Asf1b	chr8	83953506	83957506	K4me3 K27ac
ENSMUSG00000005481.18	Ddx39	chr8	83713176	83717176	K4me3 K27ac
ENSMUSG00000005483.10	Dnajb1	chr8	83606192	83610192	K4me3 K27ac
ENSMUSG00000005501.14	Usp40	chr1	88006528	88010528	K4me1
ENSMUSG00000005505.12	Kbtbd4	chr2	90903074	90907074	K4me3 K27ac
ENSMUSG00000005506.16	Celf1	chr2	90938457	90942457	K4me3 K27ac
ENSMUSG00000005510.9	Ndufs3	chr2	90902827	90906827	K4me3 K27ac
ENSMUSG00000005533.10	Igf1r	chr7	68146589	68150589	K4me1
ENSMUSG00000005534.10	Insr	chr8	3277551	3281551	K4me3 K4me1 K27ac
ENSMUSG00000005553.14	Atp4a	chr7	30720387	30724387	K4me1 K27ac
ENSMUSG00000005566.14	Trim28	chr7	13027703	13031703	Unmarked
ENSMUSG00000005575.16	Ube2m	chr7	13036275	13040275	K4me3 K4me1 K27ac
ENSMUSG00000005580.11	Adcy9	chr16	4417808	4421808	K4me3 K27ac
ENSMUSG00000005583.16	Mef2c	chr13	83502239	83506239	Unmarked
ENSMUSG00000005609.16	Ctr9	chr7	111026994	111030994	K4me3 K27ac
ENSMUSG00000005610.17	Eif4g2	chr7	111072699	111076699	Unmarked
ENSMUSG00000005611.15	Mrvi1	chr7	110924403	110928403	Unmarked
ENSMUSG00000005615.15	Pcyt1a	chr16	32429248	32433248	K4me3 K27ac
ENSMUSG00000005621.11	Zfp592	chr7	81035738	81039738	Unmarked
ENSMUSG00000005625.15	Psmd4	chr3	95040548	95044548	K4me3 K27ac
ENSMUSG00000005640.11	Insrr	chr3	87795093	87799093	K4me3 K4me1 K27ac
ENSMUSG00000005656.9	Snx6	chr12	54793652	54797652	K4me3 K27ac
ENSMUSG00000005667.8	Mthfd2	chr6	83308548	83312548	Unmarked
ENSMUSG00000005672.12	Kit	chr5	75572915	75576915	K4me3 K27ac
ENSMUSG00000005682.9	Pan2	chr10	128301373	128305373	K4me3 K4me1 K27ac
ENSMUSG00000005683.8	Cs	chr10	128335809	128339809	K4me3 K4me1 K27ac
ENSMUSG00000005686.17	Ampd3	chr7	110766342	110770342	Repressed
ENSMUSG00000005687.14	Bcas2	chr3	103169748	103173748	K4me3 K27ac
ENSMUSG00000005698.15	Ctcf	chr8	105634578	105638578	K4me3 K27ac
ENSMUSG00000005699.16	Pard6a	chr8	105699646	105703646	K4me3 K4me1 K27ac
ENSMUSG00000005718.8	Tfap4	chr16	4556783	4560783	K4me3 K27ac
ENSMUSG00000005732.14	Ranbp1	chr16	18246646	18250646	K4me3 K4me1 K27ac
ENSMUSG00000005763.15	Cd247	chr1	165862654	165866654	K4me1
ENSMUSG00000005774.12	Rfx5	chr3	94952200	94956200	K4me3 K27ac
ENSMUSG00000005779.12	Psmb4	chr3	94882843	94886843	K4me1
ENSMUSG00000005802.12	Slc30a4	chr2	122700663	122704663	K4me3 K27ac
ENSMUSG00000005803.14	Sqor	chr2	122779998	122783998	K4me1
ENSMUSG00000005804.14	Bloc1s6	chr2	122736526	122740526	K4me3 K27ac
ENSMUSG00000005813.12	Metap1	chr3	138479784	138483784	K4me1
ENSMUSG00000005823.9	Gpr108	chr17	57245689	57249689	K4me3 K4me1 K27ac
ENSMUSG00000005836.10	Gata6	chr18	11050469	11054469	K4me3 K4me1 K27ac
ENSMUSG00000005846.12	Rsl1d1	chr16	11201331	11205331	K4me3 K4me1 K27ac
ENSMUSG00000005871.15	Apc	chr18	34219251	34223251	K4me3 K4me1 K27ac
ENSMUSG00000005873.6	Reep5	chr18	34370498	34374498	K4me3 K4me1
ENSMUSG00000005881.13	Ergic3	chr2	156006044	156010044	K4me3 K27ac
ENSMUSG00000005882.18	Uqcc1	chr2	155849692	155853692	Unmarked
ENSMUSG00000005886.14	Ncoa2	chr1	13372083	13376083	K4me3 K27ac
ENSMUSG00000005893.14	Nr2c2	chr6	92143726	92147726	Unmarked
ENSMUSG00000005897.14	Nr2c1	chr10	94146418	94150418	K4me3 K27ac
ENSMUSG00000005899.14	Smpd4	chr16	17617359	17621359	K4me3 K4me1
ENSMUSG00000005907.14	Pex1	chr5	3633170	3637170	Unmarked
ENSMUSG00000005936.19	Kctd20	chr17	28950257	28954257	K4me3 K4me1 K27ac
ENSMUSG00000005949.9	Ctns	chr11	73196995	73200995	K4me3 K27ac
ENSMUSG00000005951.13	Shpk	chr11	73197459	73201459	K4me3 K27ac
ENSMUSG00000005958.15	Ephb3	chr16	21214816	21218816	K4me1 K27ac
ENSMUSG00000005968.14	Tuft1	chr3	94656803	94660803	K4me1
ENSMUSG00000005973.6	Rcn1	chr2	105393348	105397348	K4me1
ENSMUSG00000005981.11	Trap1	chr16	4075827	4079827	K4me3 K27ac
ENSMUSG00000005982.14	Naa60	chr16	3870374	3874374	K4me3 K4me1 K27ac
ENSMUSG00000005983.15	1700037C18Rik	chr16	3906623	3910623	K4me3 K27ac
ENSMUSG00000005986.16	Ankrd13d	chr19	4281135	4285135	K4me3 K27ac
ENSMUSG00000006005.18	Tpr	chr1	150409996	150413996	Unmarked
ENSMUSG00000006010.14	Odr4	chr1	150390747	150394747	K4me3 K27ac
ENSMUSG00000006019.15	Dhx34	chr7	16211185	16215185	Unmarked
ENSMUSG00000006021.5	Kptn	chr7	16117894	16121894	K4me3 K27ac
ENSMUSG00000006024.13	Napa	chr7	16096457	16100457	K4me3 K4me1 K27ac
ENSMUSG00000006050.12	Sra1	chr18	36668608	36672608	K4me3 K27ac
ENSMUSG00000006057.15	Atp5g1	chr11	96073619	96077619	K4me3 K4me1 K27ac
ENSMUSG00000006058.10	Snf8	chr11	96032950	96036950	K4me3 K27ac
ENSMUSG00000006095.12	Tbcb	chr7	30225061	30229061	Unmarked
ENSMUSG00000006127.9	Inpp5k	chr11	75629028	75633028	K4me3 K27ac
ENSMUSG00000006134.4	Crkl	chr16	17449986	17453986	K4me3 K27ac
ENSMUSG00000006154.13	Eps8l1	chr7	4458701	4462701	Unmarked
ENSMUSG00000006169.20	Clint1	chr11	45849963	45853963	K4me3 K27ac
ENSMUSG00000006191.17	Cdkal1	chr13	29853647	29857647	K4me3 K27ac
ENSMUSG00000006204.7	Cdcp3	chr7	131172420	131176420	Unmarked
ENSMUSG00000006205.13	Htra1	chr7	130979669	130983669	K4me1
ENSMUSG00000006215.12	Zbtb17	chr4	141442653	141446653	K4me3 K27ac
ENSMUSG00000006219.12	Fblim1	chr4	141596224	141600224	K4me3 K4me1 K27ac
ENSMUSG00000006221.7	Hspb7	chr4	141418778	141422778	K4me1
ENSMUSG00000006241.16	Ccdc159	chr9	21925611	21929611	K4me3 K4me1 K27ac
ENSMUSG00000006262.15	Mob1b	chr5	88718976	88722976	K4me3 K27ac
ENSMUSG00000006273.14	Atp6v1b2	chr8	69100212	69104212	Unmarked
ENSMUSG00000006276.10	Eps15l1	chr8	72419455	72423455	K4me3 K27ac
ENSMUSG00000006281.8	Tep1	chr14	50822889	50826889	Unmarked
ENSMUSG00000006288.8	Ttc5	chr14	50783493	50787493	K4me3 K27ac
ENSMUSG00000006289.14	Osgep	chr14	50922688	50926688	K4me3 K4me1 K27ac
ENSMUSG00000006299.13	Aamp	chr1	74282738	74286738	K4me3 K4me1
ENSMUSG00000006301.17	Tmbim1	chr1	74302120	74306120	K4me3 K4me1 K27ac
ENSMUSG00000006304.14	Arpc2	chr1	74234516	74238516	K4me3 K27ac
ENSMUSG00000006307.16	Kmt2b	chr7	30568664	30572664	Unmarked
ENSMUSG00000006315.9	Tmem147	chr7	30727426	30731426	K4me3 K4me1 K27ac
ENSMUSG00000006333.14	Rps9	chr7	3701992	3705992	K4me3 K4me1 K27ac
ENSMUSG00000006335.16	Tfpt	chr7	3627859	3631859	K4me3 K4me1 K27ac
ENSMUSG00000006342.15	Susd2	chr10	75641980	75645980	K4me1 K27ac
ENSMUSG00000006344.17	Ggt5	chr10	75587380	75591380	K4me1 K27ac
ENSMUSG00000006345.10	Ggt1	chr10	75566661	75570661	K4me1
ENSMUSG00000006356.10	Crip2	chr12	113138235	113142235	K4me3 K27ac
ENSMUSG00000006360.11	Crip1	chr12	113150080	113154080	Bivalent
ENSMUSG00000006362.16	Cbfa2t3	chr8	122676111	122680111	K4me3 K4me1 K27ac
ENSMUSG00000006369.14	Fbln1	chr15	85261453	85265453	K4me1
ENSMUSG00000006386.15	Tek	chr4	94737299	94741299	Unmarked
ENSMUSG00000006390.15	Elovl1	chr4	118426173	118430173	K4me3 K4me1 K27ac
ENSMUSG00000006392.16	Med8	chr4	118409436	118413436	K4me1 K27ac
ENSMUSG00000006395.16	Hyi	chr4	118357989	118361989	K4me3 K27ac
ENSMUSG00000006398.15	Cdc20	chr4	118433821	118437821	K4me3 K27ac
ENSMUSG00000006403.13	Adamts4	chr1	171248422	171252422	K4me1
ENSMUSG00000006412.10	Pfdn2	chr1	171354389	171358389	Unmarked
ENSMUSG00000006418.17	Rnf114	chr2	167501445	167505445	K4me3 K4me1 K27ac
ENSMUSG00000006435.16	Neurl1a	chr19	47177150	47181150	Bivalent
ENSMUSG00000006442.10	Srm	chr4	148589917	148593917	K4me3 K27ac
ENSMUSG00000006456.10	Rbm14	chr19	4809634	4813634	K4me3 K27ac
ENSMUSG00000006457.4	Actn3	chr19	4875909	4879909	K4me3 K4me1
ENSMUSG00000006463.13	Zdhhc24	chr19	4876689	4880689	K4me3 K4me1
ENSMUSG00000006464.9	Bbs1	chr19	4904627	4908627	Unmarked
ENSMUSG00000006471.18	Ndor1	chr2	25253346	25257346	K4me3 K27ac
ENSMUSG00000006494.11	Pdk1	chr2	71871742	71875742	K4me3 K27ac
ENSMUSG00000006498.16	Ptbp1	chr10	79852666	79856666	K4me3 K4me1 K27ac
ENSMUSG00000006517.5	Mvd	chr8	122441396	122445396	K4me3 K4me1 K27ac
ENSMUSG00000006519.11	Cyba	chr8	122430905	122434905	K4me3 K4me1 K27ac
ENSMUSG00000006526.13	Stimate	chr14	30870354	30874354	Unmarked
ENSMUSG00000006546.3	Cryba2	chr1	74890892	74894892	K4me3 K4me1 K27ac
ENSMUSG00000006567.11	Atp7b	chr8	22058019	22062019	K4me3 K27ac
ENSMUSG00000006575.14	Rundc3a	chr11	102397857	102401857	Bivalent
ENSMUSG00000006585.3	Cdt1	chr8	122566025	122570025	K4me3 K4me1 K27ac
ENSMUSG00000006586.15	Runx1t1	chr4	13749296	13753296	K4me3 K27ac
ENSMUSG00000006589.8	Aprt	chr8	122574890	122578890	K4me3 K4me1 K27ac
ENSMUSG00000006599.13	Gtf2h1	chr7	46794102	46798102	K4me3 K27ac
ENSMUSG00000006611.15	Hfe	chr13	23708854	23712854	K4me3 K4me1 K27ac
ENSMUSG00000006638.15	Abhd1	chr5	30948105	30952105	K4me1
ENSMUSG00000006641.12	Slc5a6	chr5	31040605	31044605	Unmarked
ENSMUSG00000006649.17	Nphs1	chr7	30457724	30461724	K4me1 K27ac
ENSMUSG00000006651.8	Aplp1	chr7	30443489	30447489	K4me3 K4me1 K27ac
ENSMUSG00000006673.14	Qrich1	chr9	108515102	108519102	K4me3 K27ac
ENSMUSG00000006675.10	P4htm	chr9	108580936	108584936	Unmarked
ENSMUSG00000006676.16	Usp19	chr9	108492629	108496629	Unmarked
ENSMUSG00000006699.17	Cdc42	chr4	137355720	137359720	K4me3 K27ac
ENSMUSG00000006705.13	Pknox1	chr17	31589722	31593722	Unmarked
ENSMUSG00000006711.15	D130043K22Rik	chr13	24843134	24847134	K4me3 K4me1 K27ac
ENSMUSG00000006715.11	Gmnn	chr13	24759897	24763897	K4me3 K27ac
ENSMUSG00000006717.7	Acot13	chr13	24829540	24833540	K4me3 K4me1 K27ac
ENSMUSG00000006720.16	Zfp184	chr13	21943111	21947111	K4me3 K27ac
ENSMUSG00000006724.12	Cyp27b1	chr10	127046670	127050670	Bivalent
ENSMUSG00000006728.12	Cdk4	chr10	127064075	127068075	K4me3 K4me1 K27ac
ENSMUSG00000006731.10	B4galnt1	chr10	127163830	127167830	Bivalent
ENSMUSG00000006732.14	Mettl1	chr10	127039982	127043982	Bivalent
ENSMUSG00000006736.9	Tspan31	chr10	127068261	127072261	K4me3 K4me1 K27ac
ENSMUSG00000006740.14	Kif5b	chr18	6239523	6243523	K4me3 K27ac
ENSMUSG00000006763.14	Saal1	chr7	46706917	46710917	Unmarked
ENSMUSG00000006764.8	Tph2	chr10	115183022	115187022	Unmarked
ENSMUSG00000006777.7	Krt23	chr11	99491137	99495137	K4me1
ENSMUSG00000006782.16	Cnp	chr11	100572903	100576903	K4me3 K27ac
ENSMUSG00000006784.14	Ttc25	chr11	100547546	100551546	Unmarked
ENSMUSG00000006800.14	Sulf2	chr2	166076119	166080119	K4me1
ENSMUSG00000006818.5	Sod2	chr17	13004845	13008845	K4me3 K27ac
ENSMUSG00000006850.8	Tmco6	chr18	36733067	36737067	K4me3 K27ac
ENSMUSG00000006906.10	Stambp	chr6	83570729	83574729	K4me3 K27ac
ENSMUSG00000006920.14	Ezh1	chr11	101201305	101205305	Unmarked
ENSMUSG00000006930.15	Hap1	chr11	100352040	100356040	K4me3 K27ac
ENSMUSG00000006931.15	P3h4	chr11	100412836	100416836	K4me3 K27ac
ENSMUSG00000006932.17	Ctnnb1	chr9	120953456	120957456	Unmarked
ENSMUSG00000006941.5	Eif1b	chr9	120490490	120494490	K4me3 K4me1 K27ac
ENSMUSG00000006958.14	Chrd	chr16	20731128	20735128	Bivalent
ENSMUSG00000006998.16	Psmd2	chr16	20657006	20661006	Unmarked
ENSMUSG00000007021.5	Syngr3	chr17	24687955	24691955	Bivalent
ENSMUSG00000007029.16	Vars	chr17	35011835	35015835	Unmarked
ENSMUSG00000007030.8	Vwa7	chr17	35014637	35018637	Unmarked
ENSMUSG00000007034.15	Slc44a4	chr17	34912469	34916469	K4me1 K27ac
ENSMUSG00000007035.15	Msh5	chr17	35044622	35048622	K4me3 K4me1 K27ac
ENSMUSG00000007036.15	Abhd16a	chr17	35087869	35091869	K4me3 K27ac
ENSMUSG00000007038.5	Neu1	chr17	34929252	34933252	K4me3 K4me1 K27ac
ENSMUSG00000007039.12	Ddah2	chr17	35057815	35061815	K4me3 K4me1 K27ac
ENSMUSG00000007041.9	Clic1	chr17	35050449	35054449	K4me3 K4me1 K27ac
ENSMUSG00000007050.17	Lsm2	chr17	34979879	34983879	K4me3 K27ac
ENSMUSG00000007080.14	Pole	chr5	110284340	110288340	K4me3 K4me1
ENSMUSG00000007097.14	Atp1a2	chr1	172296064	172300064	K4me1
ENSMUSG00000007207.10	Stx1a	chr5	135035510	135039510	K4me1
ENSMUSG00000007216.6	Zfp775	chr6	48600062	48604062	K4me3 K27ac
ENSMUSG00000007338.10	Mrpl49	chr19	6055785	6059785	K4me3 K27ac
ENSMUSG00000007379.15	Dennd2c	chr3	103125555	103129555	Unmarked
ENSMUSG00000007411.16	Mark3	chr12	111586149	111590149	K4me1
ENSMUSG00000007415.15	Gatad1	chr5	3645934	3649934	K4me3 K27ac
ENSMUSG00000007440.10	Pcdha11	chr18	37003202	37007202	Bivalent
ENSMUSG00000007458.14	M6pr	chr6	122306719	122310719	K4me3 K27ac
ENSMUSG00000007476.18	Lrrc8a	chr2	30235721	30239721	K4me3 K4me1 K27ac
ENSMUSG00000007564.15	Ppp2r1a	chr17	20954576	20958576	Unmarked
ENSMUSG00000007570.16	Fance	chr17	28311518	28315518	K4me3 K27ac
ENSMUSG00000007589.9	Tinf2	chr14	55679804	55683804	K4me3 K4me1 K27ac
ENSMUSG00000007591.15	Tssk4	chr14	55648183	55652183	Unmarked
ENSMUSG00000007603.9	Dus3l	chr17	56762756	56766756	K4me3 K27ac
ENSMUSG00000007610.15	Gtpbp3	chr8	71486102	71490102	K4me3 K4me1 K27ac
ENSMUSG00000007613.15	Tgfbr1	chr4	47351306	47355306	K4me3 K27ac
ENSMUSG00000007617.18	Homer1	chr13	93303183	93307183	K4me3 K27ac
ENSMUSG00000007646.13	Rad51c	chr11	87402423	87406423	K4me3 K27ac
ENSMUSG00000007655.16	Cav1	chr6	17304410	17308410	Bivalent
ENSMUSG00000007656.13	Arpp19	chr9	75035676	75039676	K4me3 K27ac
ENSMUSG00000007659.18	Bcl2l1	chr2	152828666	152832666	K4me3 K4me1 K27ac
ENSMUSG00000007670.10	Khsrp	chr17	57022171	57026171	Unmarked
ENSMUSG00000007721.6	Ccdc124	chr8	70871935	70875935	K4me3 K27ac
ENSMUSG00000007739.10	Cct4	chr11	22999933	23003933	Unmarked
ENSMUSG00000007777.9	0610009B22Rik	chr11	51686653	51690653	K4me3 K27ac
ENSMUSG00000007812.16	Zfp655	chr5	145229728	145233728	K4me3 K27ac
ENSMUSG00000007815.13	Rhoa	chr9	108304828	108308828	K4me3 K27ac
ENSMUSG00000007817.15	Zmiz1	chr14	25605837	25609837	K4me3 K4me1 K27ac
ENSMUSG00000007827.10	Ankrd26	chr6	118560226	118564226	K4me1
ENSMUSG00000007833.15	Aldh16a1	chr7	45152584	45156584	K4me3 K27ac
ENSMUSG00000007836.6	Hnrnpa0	chr13	58126556	58130556	K4me3 K27ac
ENSMUSG00000007837.11	Prrg2	chr7	45060677	45064677	K4me3 K4me1 K27ac
ENSMUSG00000007850.16	Hnrnph1	chr11	50382962	50386962	Unmarked
ENSMUSG00000007867.9	Ift43	chr12	86080586	86084586	K4me3 K27ac
ENSMUSG00000007872.3	Id3	chr4	136142973	136146973	K4me3 K4me1 K27ac
ENSMUSG00000007880.16	Arid1a	chr4	133718776	133722776	K4me1 K27ac
ENSMUSG00000007888.15	Crlf1	chr8	70491157	70495157	Bivalent
ENSMUSG00000007891.16	Ctsd	chr7	142385857	142389857	K4me3 K4me1 K27ac
ENSMUSG00000007892.8	Rplp1	chr9	61912542	61916542	K4me3 K27ac
ENSMUSG00000007908.14	Hmgcll1	chr9	76012854	76016854	Unmarked
ENSMUSG00000007946.11	Phox2a	chr7	101818745	101822745	Bivalent
ENSMUSG00000007950.9	Abhd8	chr8	71456907	71460907	Unmarked
ENSMUSG00000007987.12	Ift22	chr5	136906242	136910242	K4me3 K27ac
ENSMUSG00000007989.7	Fzd3	chr14	65260463	65264463	K4me3 K27ac
ENSMUSG00000008036.11	Ap2s1	chr7	16736537	16740537	Bivalent
ENSMUSG00000008090.14	Fgfrl1	chr5	108692267	108696267	K4me3 K27ac
ENSMUSG00000008129.14	4930432K21Rik	chr8	84146158	84150158	K4me3 K4me1 K27ac
ENSMUSG00000008136.14	Fhl2	chr1	43194984	43198984	K4me1
ENSMUSG00000008140.18	Emc10	chr7	44494428	44498428	K4me3 K4me1 K27ac
ENSMUSG00000008167.14	Fbxw9	chr8	85058096	85062096	K4me3 K27ac
ENSMUSG00000008200.15	Fnbp4	chr2	90756406	90760406	Unmarked
ENSMUSG00000008226.14	Scrn3	chr2	73310658	73314658	K4me3 K27ac
ENSMUSG00000008301.11	Phax	chr18	56560592	56564592	K4me3 K27ac
ENSMUSG00000008305.18	Tle1	chr4	72198893	72202893	K4me3 K4me1 K27ac
ENSMUSG00000008307.11	1700109H08Rik	chr5	3576222	3580222	Unmarked
ENSMUSG00000008318.10	Relt	chr7	100861158	100865158	K4me3 K4me1
ENSMUSG00000008333.12	Snrpb2	chr2	143066172	143070172	Unmarked
ENSMUSG00000008348.9	Ubc	chr5	125387186	125391186	K4me3 K27ac
ENSMUSG00000008373.16	Prpf31	chr7	3628556	3632556	K4me3 K4me1 K27ac
ENSMUSG00000008384.8	Sertad1	chr7	27484909	27488909	K4me3 K27ac
ENSMUSG00000008429.8	Herpud2	chr9	25149820	25153820	K4me3 K4me1 K27ac
ENSMUSG00000008435.15	Rdh13	chr7	4443642	4447642	K4me3 K27ac
ENSMUSG00000008450.8	Nutf2	chr8	105858644	105862644	K4me3 K4me1 K27ac
ENSMUSG00000008475.13	Arpc5	chr1	152766498	152770498	K4me3 K27ac
ENSMUSG00000008489.18	Elavl2	chr4	91252582	91256582	Unmarked
ENSMUSG00000008496.19	Pou2f2	chr7	25130488	25134488	Bivalent
ENSMUSG00000008540.11	Mgst1	chr6	138138553	138142553	K4me3 K4me1 K27ac
ENSMUSG00000008575.17	Nfib	chr4	82497316	82501316	K4me1
ENSMUSG00000008590.4	Htr3b	chr9	48962990	48966990	Repressed
ENSMUSG00000008604.11	Ubqln4	chr3	88561906	88565906	Unmarked
ENSMUSG00000008658.16	Rbfox1	chr16	6347137	6351137	Bivalent
ENSMUSG00000008668.15	Rps18	chr17	33950541	33954541	K4me3 K4me1 K27ac
ENSMUSG00000008683.16	Rps15a	chr7	118113256	118117256	K4me3 K27ac
ENSMUSG00000008690.15	Ncaph2	chr15	89353913	89357913	K4me3 K27ac
ENSMUSG00000008730.17	Hipk1	chr3	103789275	103793275	K4me3 K27ac
ENSMUSG00000008734.9	Gprc5b	chr7	118982644	118986644	K4me1 K27ac
ENSMUSG00000008763.16	Man1a2	chr3	100682613	100686613	K4me3 K27ac
ENSMUSG00000008822.15	Acyp1	chr12	85278435	85282435	Bivalent
ENSMUSG00000008855.17	Hdac5	chr11	102197493	102201493	Unmarked
ENSMUSG00000008859.8	Rala	chr13	17941949	17945949	K4me3 K27ac
ENSMUSG00000008892.12	Vdac3	chr8	22584121	22588121	Unmarked
ENSMUSG00000008958.14	Vps72	chr3	95109072	95113072	K4me3 K27ac
ENSMUSG00000008976.16	Gabpa	chr16	84832924	84836924	K4me3 K27ac
ENSMUSG00000008999.7	Bmp7	chr2	172938321	172942321	K4me3 K4me1 K27ac
ENSMUSG00000009030.14	Pdcl	chr2	37357196	37361196	K4me3 K27ac
ENSMUSG00000009035.15	Tmem184b	chr15	79367993	79371993	K4me1 K27ac
ENSMUSG00000009073.16	Nf2	chr11	4818396	4822396	Unmarked
ENSMUSG00000009075.2	Cabp7	chr11	4744778	4748778	Bivalent
ENSMUSG00000009076.10	Zmat5	chr11	4702677	4706677	K4me3 K27ac
ENSMUSG00000009079.16	Ewsr1	chr11	5097042	5101042	K4me3 K27ac
ENSMUSG00000009090.17	Ap1b1	chr11	4984823	4988823	K4me3 K4me1 K27ac
ENSMUSG00000009097.10	Tbx1	chr16	18588671	18592671	Bivalent
ENSMUSG00000009112.4	Bcl2l13	chr6	120834211	120838211	K4me3 K27ac
ENSMUSG00000009114.17	2610028H24Rik	chr10	76447080	76451080	Unmarked
ENSMUSG00000009145.6	Dqx1	chr6	83055843	83059843	K4me1
ENSMUSG00000009207.15	Lnpk	chr2	74577435	74581435	K4me3 K27ac
ENSMUSG00000009210.10	Prr29	chr11	106372844	106376844	K4me1 K27ac
ENSMUSG00000009281.6	Rarres2	chr6	48570646	48574646	Unmarked
ENSMUSG00000009291.13	Pttg1ip	chr10	77579821	77583821	K4me3 K4me1 K27ac
ENSMUSG00000009293.17	Ube2g2	chr10	77620377	77624377	K4me3 K27ac
ENSMUSG00000009376.15	Met	chr6	17544972	17548972	Unmarked
ENSMUSG00000009394.13	Syn2	chr6	115132949	115136949	Repressed
ENSMUSG00000009418.16	Nav1	chr1	135451907	135455907	Unmarked
ENSMUSG00000009470.17	Tnpo1	chr13	98924354	98928354	K4me3 K27ac
ENSMUSG00000009535.13	Rnmt	chr18	68298421	68302421	K4me3 K27ac
ENSMUSG00000009545.14	Kcnq1	chr7	143105253	143109253	K4me3 K4me1
ENSMUSG00000009549.14	Srp14	chr2	118476883	118480883	K4me3 K4me1 K27ac
ENSMUSG00000009555.16	Cdk9	chr2	32710253	32714253	K4me3 K4me1 K27ac
ENSMUSG00000009563.16	Tor2a	chr2	32755244	32759244	K4me3 K27ac
ENSMUSG00000009566.12	Fpgs	chr2	32702031	32706031	K4me1 K27ac
ENSMUSG00000009569.14	Mrtfb	chr16	13254480	13258480	K4me3 K4me1 K27ac
ENSMUSG00000009575.14	Cbx5	chr15	103213366	103217366	K4me3 K27ac
ENSMUSG00000009585.18	Apobec3	chr15	79890407	79894407	K4me3 K4me1 K27ac
ENSMUSG00000009614.16	Sardh	chr2	27223192	27227192	K4me1 K27ac
ENSMUSG00000009621.18	Vav2	chr2	27424912	27428912	K4me3 K4me1 K27ac
ENSMUSG00000009628.14	Tex15	chr8	33568543	33572543	Unmarked
ENSMUSG00000009630.10	Ppp2cb	chr8	33597624	33601624	K4me3 K27ac
ENSMUSG00000009633.3	G0s2	chr1	193271217	193275217	K4me3 K4me1 K27ac
ENSMUSG00000009640.11	Dmap1	chr4	117680271	117684271	K4me3 K27ac
ENSMUSG00000009647.13	Mcu	chr10	59456160	59460160	Unmarked
ENSMUSG00000009681.10	Bcr	chr10	75172970	75176970	K4me1 K27ac
ENSMUSG00000009733.9	Tfcp2	chr15	100510244	100514244	Unmarked
ENSMUSG00000009734.18	Pou6f2	chr13	18380041	18384041	Unmarked
ENSMUSG00000009739.17	Pou6f1	chr15	100584365	100588365	Unmarked
ENSMUSG00000009741.15	Ubp1	chr9	113929434	113933434	K4me3 K4me1 K27ac
ENSMUSG00000009772.15	Nuak2	chr1	132314125	132318125	K4me3 K4me1
ENSMUSG00000009828.15	Ick	chr9	78111283	78115283	K4me1
ENSMUSG00000009863.14	Sdhb	chr4	140959402	140963402	K4me3 K4me1 K27ac
ENSMUSG00000009876.13	Cox4i2	chr2	152752172	152756172	K4me3 K4me1
ENSMUSG00000009894.15	Snap47	chr11	59449186	59453186	K4me3 K27ac
ENSMUSG00000009905.5	Kdsr	chr1	106757727	106761727	K4me3 K4me1 K27ac
ENSMUSG00000009907.17	Vps4b	chr1	106780794	106784794	Unmarked
ENSMUSG00000009927.9	Rps25	chr9	44405138	44409138	K4me3 K27ac
ENSMUSG00000010021.13	Kif19a	chr11	114763387	114767387	K4me3 K4me1 K27ac
ENSMUSG00000010025.19	Aldh3a2	chr11	61265185	61269185	K4me3 K27ac
ENSMUSG00000010045.2	Tmem115	chr9	107531944	107535944	K4me3 K27ac
ENSMUSG00000010047.12	Hyal2	chr9	107565944	107569944	K4me3 K27ac
ENSMUSG00000010048.10	Ifrd2	chr9	107590084	107594084	Unmarked
ENSMUSG00000010051.15	Hyal1	chr9	107574926	107578926	K4me1 K27ac
ENSMUSG00000010054.4	Tusc2	chr9	107561369	107565369	K4me3 K4me1
ENSMUSG00000010057.8	Nprl2	chr9	107540240	107544240	K4me3 K4me1 K27ac
ENSMUSG00000010064.15	Slc38a3	chr9	107667003	107671003	K4me1 K27ac
ENSMUSG00000010067.13	Rassf1	chr9	107549561	107553561	K4me3 K4me1
ENSMUSG00000010080.15	Epn3	chr11	94496250	94500250	K4me3 K4me1 K27ac
ENSMUSG00000010086.17	Rnf112	chr11	61451919	61455919	K4me3 K4me1 K27ac
ENSMUSG00000010095.13	Slc3a2	chr19	8711356	8715356	K4me3 K4me1 K27ac
ENSMUSG00000010097.15	Nxf1	chr19	8768091	8772091	K4me3 K27ac
ENSMUSG00000010110.17	Stx5a	chr19	8746532	8750532	Unmarked
ENSMUSG00000010142.12	Tnfrsf13b	chr11	61138834	61142834	Unmarked
ENSMUSG00000010154.7	Spire2	chr8	123348250	123352250	K4me1
ENSMUSG00000010175.13	Prox1	chr1	190168714	190172714	K4me3 K4me1 K27ac
ENSMUSG00000010205.11	Raver1	chr9	21090008	21094008	K4me3 K4me1 K27ac
ENSMUSG00000010277.7	2610507B11Rik	chr11	78259751	78263751	K4me3 K27ac
ENSMUSG00000010290.7	AI597479	chr1	43096709	43100709	K4me3 K27ac
ENSMUSG00000010307.7	Tmem86a	chr7	47049864	47053864	K4me3 K4me1 K27ac
ENSMUSG00000010358.13	Ifi35	chr11	101446406	101450406	K4me1
ENSMUSG00000010362.9	Rdm1	chr11	101625941	101629941	K4me3 K27ac
ENSMUSG00000010376.15	Nedd8	chr14	55669877	55673877	K4me3 K4me1 K27ac
ENSMUSG00000010392.8	Gosr1	chr11	76761567	76765567	K4me3 K27ac
ENSMUSG00000010406.12	Mrpl52	chr14	54424922	54428922	K4me3 K27ac
ENSMUSG00000010453.12	Kansl3	chr1	36366014	36370014	K4me3 K27ac
ENSMUSG00000010461.15	Eya4	chr10	23183566	23187566	Unmarked
ENSMUSG00000010476.14	Ebf3	chr7	137312445	137316445	Bivalent
ENSMUSG00000010517.7	Faf1	chr4	109838784	109842784	Unmarked
ENSMUSG00000010538.14	Tsacc	chr3	88294896	88298896	K4me3 K27ac
ENSMUSG00000010554.14	Mettl16	chr11	74768829	74772829	K4me3 K27ac
ENSMUSG00000010592.9	Dazl	chr17	50281323	50285323	Unmarked
ENSMUSG00000010607.8	Pigyl	chr9	22154845	22158845	K4me3 K27ac
ENSMUSG00000010608.15	Rbm25	chr12	83630251	83634251	K4me3 K27ac
ENSMUSG00000010609.15	Psen2	chr1	180228062	180232062	Unmarked
ENSMUSG00000010660.3	Plcd1	chr9	119086261	119090261	K4me3 K4me1
ENSMUSG00000010663.5	Fads1	chr19	10191318	10195318	Unmarked
ENSMUSG00000010721.15	Lmbr1	chr5	29359090	29363090	Unmarked
ENSMUSG00000010751.15	Tnfrsf22	chr7	143634585	143638585	Unmarked
ENSMUSG00000010755.17	Cars	chr7	143598031	143602031	K4me3 K27ac
ENSMUSG00000010830.8	Kdelr3	chr15	79514410	79518410	Repressed
ENSMUSG00000010911.12	Apip	chr2	103071694	103075694	K4me3 K27ac
ENSMUSG00000010914.10	Pdhx	chr2	103071462	103075462	K4me3 K27ac
ENSMUSG00000010936.11	Vac14	chr8	110616598	110620598	K4me3 K27ac
ENSMUSG00000011034.6	Slc5a1	chr5	33102218	33106218	Bivalent
ENSMUSG00000011096.17	Akt1s1	chr7	44846990	44850990	K4me3 K4me1 K27ac
ENSMUSG00000011114.18	Tbrg1	chr9	37655237	37659237	K4me3 K27ac
ENSMUSG00000011148.14	Adssl1	chr12	112618092	112622092	K4me1
ENSMUSG00000011158.8	Brf1	chr12	112998432	113002432	K4me3 K27ac
ENSMUSG00000011171.11	Vipr2	chr12	116075759	116079759	Repressed
ENSMUSG00000011179.8	Odc1	chr12	17547457	17551457	Unmarked
ENSMUSG00000011254.16	Thg1l	chr11	45953483	45957483	K4me3 K4me1
ENSMUSG00000011256.16	Adam19	chr11	46053991	46057991	Bivalent
ENSMUSG00000011257.19	Pabpc4	chr4	123281094	123285094	Bivalent
ENSMUSG00000011263.16	Exoc3l2	chr7	19461330	19465330	Bivalent
ENSMUSG00000011267.8	Zfp296	chr7	19575828	19579828	K4me3 K4me1
ENSMUSG00000011306.7	Sugp1	chr8	70041048	70045048	K4me3 K27ac
ENSMUSG00000011427.16	Zfp790	chr7	29816990	29820990	K4me1
ENSMUSG00000011463.5	Cpb1	chr3	20264443	20268443	Unmarked
ENSMUSG00000011589.9	Fsd1	chr17	55984514	55988514	K4me3 K4me1
ENSMUSG00000011658.16	Fuz	chr7	44894251	44898251	K4me3 K4me1 K27ac
ENSMUSG00000011751.16	Sptbn4	chr7	27394198	27398198	Bivalent
ENSMUSG00000011752.7	Pgam1	chr19	41910075	41914075	K4me3 K4me1 K27ac
ENSMUSG00000011831.16	Evi5	chr5	107807782	107811782	Unmarked
ENSMUSG00000011832.15	Evi5l	chr8	4164566	4168566	K4me3 K27ac
ENSMUSG00000011837.4	Snapc2	chr8	4251418	4255418	K4me3 K27ac
ENSMUSG00000011877.13	Git1	chr11	77491561	77495561	K4me3 K4me1 K27ac
ENSMUSG00000011884.13	Gltp	chr5	114688908	114692908	K4me3 K4me1
ENSMUSG00000011958.17	Bnip2	chr9	69987514	69991514	K4me3 K4me1 K27ac
ENSMUSG00000011960.12	Ccnt1	chr15	98565636	98569636	K4me3 K27ac
ENSMUSG00000012017.4	Scarf2	chr16	17801401	17805401	Bivalent
ENSMUSG00000012076.8	Brms1l	chr12	55842191	55846191	Unmarked
ENSMUSG00000012114.17	Med15	chr16	17651055	17655055	Unmarked
ENSMUSG00000012117.13	Dhdds	chr4	133994924	133998924	Unmarked
ENSMUSG00000012123.17	Crybg2	chr4	134080311	134084311	K4me3 K4me1 K27ac
ENSMUSG00000012126.16	Ubxn11	chr4	134106348	134110348	Unmarked
ENSMUSG00000012296.16	Tjap1	chr17	46270155	46274155	K4me1
ENSMUSG00000012405.16	Rpl15	chr14	18269391	18273391	K4me3 K4me1 K27ac
ENSMUSG00000012422.14	Tmem167	chr13	90087122	90091122	K4me3 K27ac
ENSMUSG00000012429.9	Mplkip	chr13	17693432	17697432	K4me3 K27ac
ENSMUSG00000012443.4	Kif11	chr19	37400180	37404180	Unmarked
ENSMUSG00000012483.4	Rpa3	chr6	8257173	8261173	K4me3 K27ac
ENSMUSG00000012519.14	Mlkl	chr8	111336177	111340177	Bivalent
ENSMUSG00000012520.10	Phox2b	chr5	67097057	67101057	Repressed
ENSMUSG00000012535.14	Tnpo3	chr6	29607623	29611623	K4me3 K27ac
ENSMUSG00000012609.19	Ttll5	chr12	85822977	85826977	K4me3 K27ac
ENSMUSG00000012640.16	Zfp715	chr7	43311294	43315294	K4me3 K27ac
ENSMUSG00000012819.15	Cdh23	chr10	60404453	60408453	Unmarked
ENSMUSG00000012848.15	Rps5	chr7	12920289	12924289	K4me3 K27ac
ENSMUSG00000013033.16	Adgrl1	chr8	83898734	83902734	K4me3 K27ac
ENSMUSG00000013089.15	Etv5	chr16	22437719	22441719	K4me3 K27ac
ENSMUSG00000013150.15	Gfod2	chr8	105756630	105760630	K4me3 K4me1 K27ac
ENSMUSG00000013155.10	Enkd1	chr8	105706210	105710210	K4me1
ENSMUSG00000013160.7	Atp6v0d1	chr8	105564047	105568047	K4me3 K27ac
ENSMUSG00000013236.17	Ptprs	chr17	56474439	56478439	K4me3 K4me1 K27ac
ENSMUSG00000013275.9	Slc41a1	chr1	131825492	131829492	K4me3 K27ac
ENSMUSG00000013367.5	Iglon5	chr7	43476233	43480233	Repressed
ENSMUSG00000013415.9	Igf2bp1	chr11	95980611	95984611	K4me1 K27ac
ENSMUSG00000013465.19	Nelfb	chr2	25208726	25212726	K4me3 K27ac
ENSMUSG00000013495.15	Tmem175	chr5	108628001	108632001	K4me3 K4me1 K27ac
ENSMUSG00000013539.14	Tango2	chr16	18304121	18308121	Unmarked
ENSMUSG00000013593.12	Ndufs2	chr1	171245122	171249122	K4me3 K27ac
ENSMUSG00000013622.15	Atraid	chr5	31046311	31050311	K4me3 K27ac
ENSMUSG00000013629.16	Cad	chr5	31052927	31056927	K4me3 K4me1 K27ac
ENSMUSG00000013646.17	Sh3bp5l	chr11	58343311	58347311	Unmarked
ENSMUSG00000013662.6	Atad1	chr19	32692870	32696870	Unmarked
ENSMUSG00000013663.7	Pten	chr19	32755594	32759594	K4me3 K27ac
ENSMUSG00000013698.12	Pea15a	chr1	172197815	172201815	K4me1 K27ac
ENSMUSG00000013701.13	Timm23	chr14	32189957	32193957	K4me1
ENSMUSG00000013736.16	Trnt1	chr6	106767119	106771119	K4me3 K27ac
ENSMUSG00000013787.15	Ehmt2	chr17	34904743	34908743	Unmarked
ENSMUSG00000013822.7	Elof1	chr9	22115172	22119172	K4me3 K4me1 K27ac
ENSMUSG00000013833.15	Med16	chr10	79906321	79910321	K4me3 K27ac
ENSMUSG00000013846.10	St3gal1	chr15	67127023	67131023	K4me1
ENSMUSG00000013858.14	Tmem259	chr10	79976776	79980776	Unmarked
ENSMUSG00000013878.18	Rnf170	chr8	26117387	26121387	K4me3 K27ac
ENSMUSG00000013928.13	Thap8	chr7	30278555	30282555	K4me3 K4me1 K27ac
ENSMUSG00000013973.12	Dedd	chr1	171328085	171332085	K4me3 K27ac
ENSMUSG00000013997.10	Nit1	chr1	171342467	171346467	K4me3 K27ac
ENSMUSG00000014039.18	Prdm15	chr16	97849227	97853227	K4me3 K4me1 K27ac
ENSMUSG00000014074.17	Rnf168	chr16	32275460	32279460	K4me3 K27ac
ENSMUSG00000014075.15	Tctex1d2	chr16	32417701	32421701	K4me3 K27ac
ENSMUSG00000014077.13	Chp1	chr2	119545811	119549811	K4me3 K27ac
ENSMUSG00000014158.12	Trpv4	chr5	114656421	114660421	Bivalent
ENSMUSG00000014164.15	Klhl3	chr13	58111592	58115592	K4me3 K4me1
ENSMUSG00000014177.10	Tvp23b	chr11	62881661	62885661	Unmarked
ENSMUSG00000014195.15	Dnajc7	chr11	100594708	100598708	Unmarked
ENSMUSG00000014232.14	Cluap1	chr16	3906824	3910824	K4me3 K27ac
ENSMUSG00000014243.5	Zswim7	chr11	62279375	62283375	K4me3 K27ac
ENSMUSG00000014245.8	Pigl	chr11	62456607	62460607	K4me3 K27ac
ENSMUSG00000014294.4	Ndufa2	chr18	36742557	36746557	K4me3 K27ac
ENSMUSG00000014301.13	Pam16	chr16	4614988	4618988	K4me1 K27ac
ENSMUSG00000014303.13	Glis2	chr16	4609627	4613627	Unmarked
ENSMUSG00000014329.14	Bicc1	chr10	71157700	71161700	K4me3 K27ac
ENSMUSG00000014349.7	Ube2z	chr11	96063388	96067388	K4me3 K4me1 K27ac
ENSMUSG00000014353.15	Tmem87b	chr2	128816302	128820302	K4me3 K27ac
ENSMUSG00000014355.10	Anapc1	chr2	128685354	128689354	K4me3 K27ac
ENSMUSG00000014402.15	Tsg101	chr7	46917969	46921969	K4me3 K27ac
ENSMUSG00000014418.16	Hps5	chr7	46766463	46770463	Unmarked
ENSMUSG00000014426.9	Map3k4	chr17	12316391	12320391	K4me3 K27ac
ENSMUSG00000014444.17	Piezo1	chr8	122481000	122485000	Unmarked
ENSMUSG00000014470.4	Rnf166	chr8	122473688	122477688	K4me3 K4me1 K27ac
ENSMUSG00000014496.8	Ankrd28	chr14	31740829	31744829	Unmarked
ENSMUSG00000014498.9	Ankrd52	chr10	128375118	128379118	K4me3 K4me1 K27ac
ENSMUSG00000014503.15	Pkd2l2	chr18	34407425	34411425	K4me3 K4me1
ENSMUSG00000014504.16	Srp19	chr18	34329144	34333144	K4me3 K27ac
ENSMUSG00000014547.10	Wdfy2	chr14	62835677	62839677	K4me3 K27ac
ENSMUSG00000014550.14	Rbsn	chr6	92212925	92216925	K4me3 K27ac
ENSMUSG00000014551.8	Mrps25	chr6	92181971	92185971	K4me3 K27ac
ENSMUSG00000014554.13	Dguok	chr6	83504969	83508969	K4me3 K27ac
ENSMUSG00000014592.20	Camta1	chr4	151859669	151863669	Bivalent
ENSMUSG00000014599.10	Csf1	chr3	107758242	107762242	Repressed
ENSMUSG00000014601.13	Strip1	chr3	107629694	107633694	K4me3 K27ac
ENSMUSG00000014606.14	Slc25a11	chr11	70645479	70649479	K4me3 K4me1 K27ac
ENSMUSG00000014633.15	Cmc2	chr8	116919422	116923422	K4me3 K27ac
ENSMUSG00000014668.15	Chfr	chr5	110133859	110137859	K4me3 K27ac
ENSMUSG00000014704.10	Hoxa2	chr6	52162831	52166831	Repressed
ENSMUSG00000014748.13	Tex261	chr6	83770475	83774475	Unmarked
ENSMUSG00000014763.8	Fam120b	chr17	15394247	15398247	K4me3 K4me1 K27ac
ENSMUSG00000014767.17	Tbp	chr17	15497909	15501909	K4me3 K27ac
ENSMUSG00000014769.10	Psmb1	chr17	15476589	15480589	Unmarked
ENSMUSG00000014771.13	Pdcd2	chr17	15525084	15529084	K4me3 K27ac
ENSMUSG00000014773.13	Dll1	chr17	15366390	15370390	K4me1
ENSMUSG00000014776.7	Nol3	chr8	105274139	105278139	Bivalent
ENSMUSG00000014778.10	Fhod1	chr8	105345953	105349953	Bivalent
ENSMUSG00000014786.8	Slc9a5	chr8	105353461	105357461	Unmarked
ENSMUSG00000014813.9	Stc1	chr14	69027237	69031237	Bivalent
ENSMUSG00000014837.15	4931428F04Rik	chr8	105287504	105291504	K4me3 K27ac
ENSMUSG00000014846.12	Tppp3	chr8	105467410	105471410	K4me1
ENSMUSG00000014850.15	Msh3	chr13	92352996	92356996	K4me3 K4me1 K27ac
ENSMUSG00000014856.12	Tmem208	chr8	105324353	105328353	K4me3 K27ac
ENSMUSG00000014859.9	E2f4	chr8	105301924	105305924	K4me1 K27ac
ENSMUSG00000014867.9	Surf4	chr2	26931781	26935781	K4me3 K4me1 K27ac
ENSMUSG00000014873.15	Surf2	chr2	26914366	26918366	K4me3 K4me1 K27ac
ENSMUSG00000014905.4	Dnajb9	chr12	44208068	44212068	K4me3 K27ac
ENSMUSG00000014907.10	Naf1	chr8	66858956	66862956	K4me3 K27ac
ENSMUSG00000014932.15	Yes1	chr5	32609197	32613197	K4me3 K27ac
ENSMUSG00000014956.15	Ppp1cb	chr5	32457221	32461221	K4me3 K27ac
ENSMUSG00000014959.12	Gorasp2	chr2	70659575	70663575	K4me3 K27ac
ENSMUSG00000014980.14	Tsen15	chr1	152384688	152388688	K4me3 K4me1
ENSMUSG00000015002.18	Efr3a	chr15	65785839	65789839	K4me3 K27ac
ENSMUSG00000015013.9	Trappc2l	chr8	122609639	122613639	K4me3 K4me1 K27ac
ENSMUSG00000015016.8	Acsf3	chr8	122773577	122777577	K4me3 K4me1 K27ac
ENSMUSG00000015023.7	Ddx19a	chr8	110995770	110999770	K4me3 K27ac
ENSMUSG00000015027.11	Galns	chr8	122609463	122613463	K4me3 K4me1 K27ac
ENSMUSG00000015053.14	Gata2	chr6	88202444	88206444	Bivalent
ENSMUSG00000015083.11	C8g	chr2	25498613	25502613	K4me3 K4me1 K27ac
ENSMUSG00000015085.8	Entpd2	chr2	25396752	25400752	Repressed
ENSMUSG00000015087.14	Rabl6	chr2	25606456	25610456	K4me3 K27ac
ENSMUSG00000015092.9	Edf1	chr2	25555846	25559846	K4me3 K4me1 K27ac
ENSMUSG00000015094.16	Npdc1	chr2	25405691	25409691	Unmarked
ENSMUSG00000015095.12	Fbxw5	chr2	25498878	25502878	K4me3 K4me1 K27ac
ENSMUSG00000015120.15	Ube2i	chr17	25272310	25276310	K4me3 K27ac
ENSMUSG00000015126.9	Tsr3	chr17	25238169	25242169	K4me3 K27ac
ENSMUSG00000015127.14	Unkl	chr17	25186913	25190913	K4me3 K27ac
ENSMUSG00000015133.17	Lrrk1	chr7	66386307	66390307	K4me3 K4me1
ENSMUSG00000015134.15	Aldh1a3	chr7	66423701	66427701	Bivalent
ENSMUSG00000015143.15	Actn1	chr12	80258091	80262091	K4me3 K4me1 K27ac
ENSMUSG00000015149.14	Sirt2	chr7	28764766	28768766	K4me3 K27ac
ENSMUSG00000015165.16	Hnrnpl	chr7	28808939	28812939	K4me3 K4me1 K27ac
ENSMUSG00000015176.11	Nolc1	chr19	46074053	46078053	K4me3 K4me1 K27ac
ENSMUSG00000015189.12	Casd1	chr6	4598838	4602838	K4me3 K4me1 K27ac
ENSMUSG00000015202.13	Cnksr3	chr10	7210237	7214237	K4me3 K4me1 K27ac
ENSMUSG00000015222.18	Map2	chr1	66360195	66364195	K4me1
ENSMUSG00000015224.10	Cyp2j9	chr4	96589578	96593578	K4me3 K4me1
ENSMUSG00000015243.4	Abca1	chr4	53157895	53161895	K4me3 K27ac
ENSMUSG00000015247.10	Nipsnap3b	chr4	53009949	53013949	K4me3 K27ac
ENSMUSG00000015305.6	Sash1	chr10	8754761	8758761	K4me1
ENSMUSG00000015312.9	Gadd45b	chr10	80928072	80932072	Bivalent
ENSMUSG00000015335.16	Zdhhc12	chr2	30091019	30095019	K4me3 K4me1 K27ac
ENSMUSG00000015337.5	Endog	chr2	30169492	30173492	K4me3 K27ac
ENSMUSG00000015341.17	Golga7	chr8	23255021	23259021	K4me3 K27ac
ENSMUSG00000015354.8	Pcolce2	chr9	95635600	95639600	Bivalent
ENSMUSG00000015355.13	Cd48	chr1	171680008	171684008	Unmarked
ENSMUSG00000015357.10	Clpx	chr9	65292331	65296331	K4me3 K27ac
ENSMUSG00000015377.10	Dennd6b	chr15	89194448	89198448	K4me3 K4me1 K27ac
ENSMUSG00000015396.4	Cd83	chr13	43783184	43787184	Bivalent
ENSMUSG00000015451.16	C4a	chr17	34821464	34825464	Unmarked
ENSMUSG00000015452.14	Ager	chr17	34595893	34599893	K4me1
ENSMUSG00000015461.15	Atf6b	chr17	34645200	34649200	K4me1
ENSMUSG00000015467.14	Egfl8	chr17	34613321	34617321	Unmarked
ENSMUSG00000015468.14	Notch4	chr17	34562336	34566336	K4me1
ENSMUSG00000015474.16	Ppt2	chr17	34625377	34629377	K4me3 K4me1 K27ac
ENSMUSG00000015476.6	Prrt1	chr17	34629403	34633403	Bivalent
ENSMUSG00000015478.13	Rnf5	chr17	34601661	34605661	K4me3 K4me1 K27ac
ENSMUSG00000015484.3	Fam163a	chr1	156203026	156207026	Bivalent
ENSMUSG00000015488.14	Cacfd1	chr2	27007925	27011925	K4me3 K4me1 K27ac
ENSMUSG00000015501.10	Hivep2	chr10	13964378	13968378	K4me3 K4me1 K27ac
ENSMUSG00000015522.18	Arnt	chr3	95432518	95436518	K4me3 K4me1 K27ac
ENSMUSG00000015536.14	Mocs2	chr13	114816276	114820276	K4me3 K4me1 K27ac
ENSMUSG00000015542.17	Nat9	chr11	115185081	115189081	K4me3 K4me1 K27ac
ENSMUSG00000015568.16	Lpl	chr8	68878490	68882490	Bivalent
ENSMUSG00000015575.15	Atp6v0e	chr17	26674411	26678411	K4me3 K27ac
ENSMUSG00000015597.17	Zfp318	chr17	46381730	46385730	K4me3 K27ac
ENSMUSG00000015599.9	Ttbk1	chr17	46485675	46489675	Bivalent
ENSMUSG00000015605.6	Srf	chr17	46549019	46553019	K4me1 K27ac
ENSMUSG00000015647.9	Lama5	chr2	180176403	180180403	Unmarked
ENSMUSG00000015652.9	Steap1	chr5	5747326	5751326	K4me3 K27ac
ENSMUSG00000015653.13	Steap2	chr5	5692326	5696326	K4me3 K27ac
ENSMUSG00000015656.17	Hspa8	chr9	40800341	40804341	K4me3 K27ac
ENSMUSG00000015659.12	Serac1	chr17	6049388	6053388	Unmarked
ENSMUSG00000015671.11	Psma2	chr13	14611239	14615239	K4me3 K27ac
ENSMUSG00000015672.4	Mrpl32	chr13	14611015	14615015	K4me3 K27ac
ENSMUSG00000015697.14	Setdb1	chr3	95355156	95359156	Bivalent
ENSMUSG00000015702.13	Anxa9	chr3	95304804	95308804	K4me1 K27ac
ENSMUSG00000015709.9	Arnt2	chr7	84370495	84374495	Unmarked
ENSMUSG00000015711.8	Prune1	chr3	95266944	95270944	K4me1
ENSMUSG00000015714.11	Cers2	chr3	95316791	95320791	K4me1
ENSMUSG00000015733.13	Capza2	chr6	17634233	17638233	K4me3 K27ac
ENSMUSG00000015745.9	Plekho1	chr3	95994001	95998001	Bivalent
ENSMUSG00000015747.5	Vps45	chr3	96055830	96059830	K4me3 K27ac
ENSMUSG00000015748.13	Prpf3	chr3	95847574	95851574	Unmarked
ENSMUSG00000015749.12	Anp32e	chr3	95927277	95931277	K4me3 K27ac
ENSMUSG00000015750.15	Aph1a	chr3	95892464	95896464	K4me3 K4me1 K27ac
ENSMUSG00000015755.16	Tab2	chr10	7922260	7926260	Unmarked
ENSMUSG00000015757.10	Ppil4	chr10	7790907	7794907	K4me3 K27ac
ENSMUSG00000015759.11	Cnih1	chr14	46778262	46782262	Bivalent
ENSMUSG00000015766.14	Eps8	chr6	137646283	137650283	K4me3 K27ac
ENSMUSG00000015776.12	Med22	chr2	26908578	26912578	K4me3 K4me1 K27ac
ENSMUSG00000015790.16	Surf1	chr2	26912759	26916759	K4me3 K27ac
ENSMUSG00000015804.14	Med28	chr5	45518302	45522302	K4me3 K27ac
ENSMUSG00000015829.13	Tnr	chr1	159521840	159525840	Bivalent
ENSMUSG00000015837.15	Sqstm1	chr11	50200954	50204954	Unmarked
ENSMUSG00000015839.6	Nfe2l2	chr2	75702641	75706641	K4me3 K27ac
ENSMUSG00000015843.10	Rxrg	chr1	167596459	167600459	K4me3 K4me1
ENSMUSG00000015846.15	Rxra	chr2	27723218	27727218	K4me1
ENSMUSG00000015850.11	Adamtsl4	chr3	95675151	95679151	K4me1 K27ac
ENSMUSG00000015852.13	Fcrls	chr3	87261738	87265738	Unmarked
ENSMUSG00000015869.16	Prpsap1	chr11	116488348	116492348	K4me3 K27ac
ENSMUSG00000015879.8	Fam184b	chr5	45534542	45538542	Unmarked
ENSMUSG00000015880.13	Ncapg	chr5	45690049	45694049	Unmarked
ENSMUSG00000015882.18	Lcorl	chr5	45855481	45859481	K4me3 K27ac
ENSMUSG00000015889.8	Lta4h	chr10	93472917	93476917	Unmarked
ENSMUSG00000015932.8	Dstn	chr2	143913319	143917319	K4me3 K27ac
ENSMUSG00000015937.15	Macroh2a1	chr13	56088058	56092058	Unmarked
ENSMUSG00000015943.11	Bola1	chr3	96196489	96200489	K4me3 K27ac
ENSMUSG00000015944.9	Castor2	chr5	134097710	134101710	K4me3 K4me1 K27ac
ENSMUSG00000015947.10	Fcgr1	chr3	96291969	96295969	Repressed
ENSMUSG00000015950.13	Ncf1	chr5	134226399	134230399	K4me1
ENSMUSG00000015957.12	Wnt11	chr7	98836897	98840897	Bivalent
ENSMUSG00000015961.8	Adss	chr1	177794501	177798501	K4me3 K27ac
ENSMUSG00000015968.18	Cacna1d	chr14	30098763	30102763	K4me1 K27ac
ENSMUSG00000015970.19	Chdh	chr14	30007170	30011170	K4me1
ENSMUSG00000015971.5	Actr8	chr14	29986952	29990952	Unmarked
ENSMUSG00000015980.14	Lrrc27	chr7	139218610	139222610	Unmarked
ENSMUSG00000015981.12	Stk32c	chr7	139211307	139215307	K4me3 K27ac
ENSMUSG00000015994.10	Fnta	chr8	26009247	26013247	Unmarked
ENSMUSG00000016018.4	Mtrex	chr13	112879527	112883527	Unmarked
ENSMUSG00000016028.10	Celsr1	chr15	86031777	86035777	K4me3 K27ac
ENSMUSG00000016087.13	Fli1	chr9	32539595	32543595	Bivalent
ENSMUSG00000016128.14	Stard13	chr5	151188194	151192194	K4me3 K4me1 K27ac
ENSMUSG00000016179.11	Camk1g	chr1	193368225	193372225	K4me3 K4me1 K27ac
ENSMUSG00000016181.9	Utp25	chr1	193115557	193119557	Unmarked
ENSMUSG00000016200.14	Syt14	chr1	193033662	193037662	K4me3 K27ac
ENSMUSG00000016206.6	H2-M3	chr17	37268219	37272219	K4me3 K4me1
ENSMUSG00000016252.7	Atp5e	chr2	174462089	174466089	K4me3 K4me1 K27ac
ENSMUSG00000016253.12	Nelfcd	chr2	174424361	174428361	Unmarked
ENSMUSG00000016255.5	Tubb1	chr2	174448694	174452694	Unmarked
ENSMUSG00000016257.15	Prelid3b	chr2	174470931	174474931	K4me3 K4me1 K27ac
ENSMUSG00000016344.14	Ppdpf	chr2	181185246	181189246	K4me3 K27ac
ENSMUSG00000016346.17	Kcnq2	chr2	181133300	181137300	Bivalent
ENSMUSG00000016349.10	Eef1a2	chr2	181155014	181159014	Bivalent
ENSMUSG00000016356.18	Col20a1	chr2	180984534	180988534	K4me1 K27ac
ENSMUSG00000016386.15	Mpped2	chr2	106728489	106732489	Unmarked
ENSMUSG00000016477.18	E2f3	chr13	29982391	29986391	K4me3 K27ac
ENSMUSG00000016481.15	Cr1l	chr1	195115641	195119641	Unmarked
ENSMUSG00000016487.15	Ppfibp1	chr6	146994441	146998441	Unmarked
ENSMUSG00000016493.13	Cd46	chr1	195090249	195094249	K4me1
ENSMUSG00000016495.12	Plgrkt	chr19	29359407	29363407	K4me1
ENSMUSG00000016496.7	Cd274	chr19	29365454	29369454	K4me3 K4me1
ENSMUSG00000016503.17	Gtf3a	chr5	146946704	146950704	K4me3 K27ac
ENSMUSG00000016510.11	Mtif3	chr5	146961743	146965743	K4me3 K27ac
ENSMUSG00000016520.7	Lnx2	chr5	147074586	147078586	K4me3 K27ac
ENSMUSG00000016526.8	Dyrk3	chr1	131136340	131140340	K4me3 K27ac
ENSMUSG00000016528.10	Mapkapk2	chr1	131095826	131099826	K4me3 K4me1 K27ac
ENSMUSG00000016541.10	Atxn10	chr15	85334244	85338244	K4me3 K4me1 K27ac
ENSMUSG00000016554.9	Eif3d	chr15	77966523	77970523	K4me3 K4me1 K27ac
ENSMUSG00000016559.14	H3f3b	chr11	116022514	116026514	K4me3 K27ac
ENSMUSG00000016619.10	Nup50	chr15	84921448	84925448	K4me3 K27ac
ENSMUSG00000016624.15	Phf21b	chr15	84854049	84858049	K4me3 K4me1 K27ac
ENSMUSG00000016637.7	Ift27	chr15	78164936	78168936	Unmarked
ENSMUSG00000016664.16	Pacsin2	chr15	83462606	83466606	K4me3 K27ac
ENSMUSG00000016756.17	Cmah	chr13	24325419	24329419	Unmarked
ENSMUSG00000016757.11	Ttll12	chr15	83593157	83597157	K4me3 K4me1 K27ac
ENSMUSG00000016763.15	Scube1	chr15	83723021	83727021	Bivalent
ENSMUSG00000016831.12	Tox4	chr14	52277145	52281145	K4me3 K27ac
ENSMUSG00000016833.14	Mrps18c	chr5	100796626	100800626	K4me3 K27ac
ENSMUSG00000016918.15	Sulf1	chr1	12726118	12730118	Unmarked
ENSMUSG00000016921.14	Srsf6	chr2	162929527	162933527	K4me3 K27ac
ENSMUSG00000016933.17	Plcg1	chr2	160729732	160733732	K4me3 K27ac
ENSMUSG00000016940.18	Kctd2	chr11	115418127	115422127	K4me3 K4me1 K27ac
ENSMUSG00000016942.6	Tmprss6	chr15	78440435	78444435	Unmarked
ENSMUSG00000016946.6	Kctd5	chr17	24071485	24075485	K4me3 K4me1 K27ac
ENSMUSG00000016984.7	Etaa1	chr11	17951875	17955875	K4me3 K27ac
ENSMUSG00000016995.17	Matn4	chr2	164402612	164406612	Bivalent
ENSMUSG00000017007.9	Rbpjl	chr2	164401208	164405208	Bivalent
ENSMUSG00000017009.3	Sdc4	chr2	164441887	164445887	K4me3 K4me1
ENSMUSG00000017119.19	Nbr1	chr11	101550866	101554866	K4me3 K27ac
ENSMUSG00000017132.17	Cyth1	chr11	118246560	118250560	K4me3 K4me1 K27ac
ENSMUSG00000017144.8	Rnd3	chr2	51147094	51151094	K4me3 K27ac
ENSMUSG00000017146.12	Brca1	chr11	101520459	101524459	Unmarked
ENSMUSG00000017167.6	Cntnap1	chr11	101174040	101178040	Bivalent
ENSMUSG00000017176.17	Nt5c3b	chr11	100438916	100442916	K4me1
ENSMUSG00000017188.3	Coa3	chr11	101277114	101281114	K4me3 K4me1 K27ac
ENSMUSG00000017195.15	Zpbp2	chr11	98553442	98557442	Unmarked
ENSMUSG00000017210.14	Med24	chr11	98706003	98710003	Unmarked
ENSMUSG00000017221.14	Psmd3	chr11	98680590	98684590	K4me3 K27ac
ENSMUSG00000017264.16	Exosc10	chr4	148564356	148568356	Unmarked
ENSMUSG00000017286.15	Glod4	chr11	76237572	76241572	Unmarked
ENSMUSG00000017288.15	Vps53	chr11	76164201	76168201	Unmarked
ENSMUSG00000017291.13	Taok1	chr11	77605815	77609815	K4me3 K27ac
ENSMUSG00000017299.13	Dnttip1	chr2	164743982	164747982	K4me3 K4me1 K27ac
ENSMUSG00000017307.16	Acot8	chr2	164802822	164806822	K4me3 K27ac
ENSMUSG00000017314.12	Mpp2	chr11	102086455	102090455	K4me3 K4me1 K27ac
ENSMUSG00000017344.4	Vtn	chr11	78497171	78501171	K4me3 K27ac
ENSMUSG00000017376.15	Nlk	chr11	78570399	78574399	Unmarked
ENSMUSG00000017386.10	Traf4	chr11	78163589	78167589	K4me3 K4me1 K27ac
ENSMUSG00000017390.15	Aldoc	chr11	78322199	78326199	K4me1
ENSMUSG00000017400.10	Stac2	chr11	98041542	98045542	Unmarked
ENSMUSG00000017404.12	Rpl19	chr11	98024923	98028923	K4me3 K27ac
ENSMUSG00000017405.14	Nek8	chr11	78174634	78178634	K4me3 K27ac
ENSMUSG00000017412.15	Cacnb4	chr2	52674831	52678831	Bivalent
ENSMUSG00000017417.14	Plxdc1	chr11	97984399	97988399	Bivalent
ENSMUSG00000017418.14	Arl5b	chr2	15072998	15076998	Unmarked
ENSMUSG00000017421.18	Zfp207	chr11	80381278	80385278	K4me3 K4me1 K27ac
ENSMUSG00000017428.16	Psmd11	chr11	80426685	80430685	K4me3 K27ac
ENSMUSG00000017446.14	C1qtnf1	chr11	118426498	118430498	K4me1
ENSMUSG00000017453.4	Pipox	chr11	77880686	77884686	Unmarked
ENSMUSG00000017466.9	Timp2	chr11	118353506	118357506	K4me3 K27ac
ENSMUSG00000017478.15	Zc3h18	chr8	122374680	122378680	K4me3 K27ac
ENSMUSG00000017485.11	Top2b	chr14	16410082	16414082	Unmarked
ENSMUSG00000017491.9	Rarb	chr14	16573440	16577440	Bivalent
ENSMUSG00000017493.12	Igfbp4	chr11	99040185	99044185	K4me3 K27ac
ENSMUSG00000017499.15	Cdc6	chr11	98906150	98910150	K4me3 K27ac
ENSMUSG00000017548.15	Suz12	chr11	79993790	79997790	K4me3 K27ac
ENSMUSG00000017550.14	Atad5	chr11	80101002	80105002	Unmarked
ENSMUSG00000017561.16	Crlf3	chr11	80078861	80082861	K4me3 K27ac
ENSMUSG00000017615.12	Tnfaip1	chr11	78534332	78538332	K4me3 K27ac
ENSMUSG00000017631.19	Abr	chr11	76491929	76495929	K4me3 K4me1 K27ac
ENSMUSG00000017639.13	Rab11fip4	chr11	79589211	79593211	K4me3 K4me1
ENSMUSG00000017652.16	Cd40	chr2	165053679	165057679	Bivalent
ENSMUSG00000017664.16	Slc35c2	chr2	165285835	165289835	K4me3 K27ac
ENSMUSG00000017667.9	Zfp334	chr2	165386259	165390259	K4me3 K27ac
ENSMUSG00000017670.16	Elmo2	chr2	165309642	165313642	Unmarked
ENSMUSG00000017677.11	Wsb1	chr11	79252669	79256669	K4me3 K27ac
ENSMUSG00000017679.16	Ttpal	chr2	163600562	163604562	K4me3 K27ac
ENSMUSG00000017686.17	Rhot1	chr11	80207118	80211118	K4me3 K27ac
ENSMUSG00000017688.14	Hnf4g	chr3	3632149	3636149	Unmarked
ENSMUSG00000017692.8	Rhbdl3	chr11	80317689	80321689	Unmarked
ENSMUSG00000017697.3	Ada	chr2	163728866	163732866	Unmarked
ENSMUSG00000017707.9	Serinc3	chr2	163643131	163647131	K4me3 K27ac
ENSMUSG00000017713.9	Tha1	chr11	117869911	117873911	K4me1
ENSMUSG00000017715.11	Pgs1	chr11	117998794	118002794	K4me1 K27ac
ENSMUSG00000017716.15	Birc5	chr11	117847318	117851318	K4me3 K4me1 K27ac
ENSMUSG00000017718.15	Afmid	chr11	117823980	117827980	K4me3 K4me1 K27ac
ENSMUSG00000017721.15	Pigt	chr2	164495519	164499519	K4me3 K27ac
ENSMUSG00000017724.14	Etv4	chr11	101782848	101786848	Repressed
ENSMUSG00000017734.15	Dbndd2	chr2	164484105	164488105	K4me3 K4me1
ENSMUSG00000017747.13	Ghdc	chr11	100768942	100772942	K4me1
ENSMUSG00000017754.13	Pltp	chr2	164855711	164859711	Bivalent
ENSMUSG00000017760.16	Ctsa	chr2	164832309	164836309	K4me3 K4me1 K27ac
ENSMUSG00000017764.2	Zswim1	chr2	164820685	164824685	Unmarked
ENSMUSG00000017765.17	Slc12a4	chr8	105962420	105966420	K4me3 K4me1 K27ac
ENSMUSG00000017774.19	Myo1c	chr11	75649509	75653509	K4me3 K4me1 K27ac
ENSMUSG00000017776.15	Crk	chr11	75677283	75681283	K4me3 K27ac
ENSMUSG00000017778.14	Cox7c	chr13	86044904	86048904	K4me3 K27ac
ENSMUSG00000017781.17	Pitpna	chr11	75586096	75590096	K4me3 K4me1 K27ac
ENSMUSG00000017801.15	Mlx	chr11	101085303	101089303	K4me3 K4me1 K27ac
ENSMUSG00000017802.14	Retreg3	chr11	101117765	101121765	K4me3 K27ac
ENSMUSG00000017817.11	Jph2	chr2	163395949	163399949	K4me1
ENSMUSG00000017830.15	Dhx58	chr11	100697235	100701235	K4me1
ENSMUSG00000017831.8	Rab5a	chr17	53477233	53481233	K4me3 K27ac
ENSMUSG00000017837.12	Nkiras2	chr11	100620947	100624947	K4me3 K27ac
ENSMUSG00000017843.14	Ppp2r5c	chr12	110483858	110487858	K4me3 K4me1 K27ac
ENSMUSG00000017858.12	Ift52	chr2	163020442	163024442	Unmarked
ENSMUSG00000017861.11	Mybl2	chr2	163052686	163056686	K4me3 K4me1
ENSMUSG00000017868.16	Sgk2	chr2	162985501	162989501	K4me1 K27ac
ENSMUSG00000017897.18	Eya2	chr2	165767185	165771185	Unmarked
ENSMUSG00000017929.13	B4galt5	chr2	167311855	167315855	K4me1 K27ac
ENSMUSG00000017943.15	Gdap1l1	chr2	163436475	163440475	K4me3 K4me1 K27ac
ENSMUSG00000017950.16	Hnf4a	chr2	163545187	163549187	K4me1
ENSMUSG00000017969.13	Ptgis	chr2	167238589	167242589	Bivalent
ENSMUSG00000017978.18	Cadps2	chr6	23837143	23841143	K4me3 K27ac
ENSMUSG00000017999.16	Ddx27	chr2	167025541	167029541	Unmarked
ENSMUSG00000018001.18	Cyth3	chr5	143649240	143653240	Unmarked
ENSMUSG00000018008.8	Cyth4	chr15	78595148	78599148	Unmarked
ENSMUSG00000018012.11	Rac3	chr11	120719469	120723469	K4me3 K4me1 K27ac
ENSMUSG00000018040.9	Rrp7a	chr15	83115616	83119616	Unmarked
ENSMUSG00000018042.18	Cyb5r3	chr15	83168177	83172177	K4me3 K4me1 K27ac
ENSMUSG00000018068.13	Ints2	chr11	86227233	86231233	Unmarked
ENSMUSG00000018076.12	Med13l	chr5	118558678	118562678	Bivalent
ENSMUSG00000018102.5	H2bc4	chr13	23682198	23686198	K4me3 K4me1 K27ac
ENSMUSG00000018126.15	Baiap2l2	chr15	79259297	79263297	K4me3 K4me1
ENSMUSG00000018143.10	Mafk	chr5	139789533	139793533	K4me3 K4me1 K27ac
ENSMUSG00000018160.15	Med1	chr11	98191276	98195276	K4me3 K27ac
ENSMUSG00000018166.8	Erbb3	chr10	128587652	128591652	K4me3 K4me1 K27ac
ENSMUSG00000018167.10	Stard3	chr11	98356443	98360443	K4me3 K4me1 K27ac
ENSMUSG00000018169.12	Mfng	chr15	78765164	78769164	K4me1 K27ac
ENSMUSG00000018171.9	Vmp1	chr11	86600263	86604263	Unmarked
ENSMUSG00000018189.12	Uchl5	chr1	143775280	143779280	K4me3 K27ac
ENSMUSG00000018196.18	Glrx2	chr1	143737617	143741617	K4me3 K27ac
ENSMUSG00000018199.9	Ro60	chr1	143769026	143773026	K4me1
ENSMUSG00000018209.15	Stk4	chr2	164072137	164076137	K4me3 K4me1 K27ac
ENSMUSG00000018217.12	Pmp22	chr11	63129511	63133511	Bivalent
ENSMUSG00000018238.6	Gdf9	chr11	53430841	53434841	K4me3 K4me1 K27ac
ENSMUSG00000018239.9	Zcchc10	chr11	53325399	53329399	Unmarked
ENSMUSG00000018286.6	Psmb6	chr11	70524109	70528109	K4me3 K4me1 K27ac
ENSMUSG00000018287.12	Spag7	chr11	70667218	70671218	K4me3 K4me1 K27ac
ENSMUSG00000018293.4	Pfn1	chr11	70652621	70656621	K4me3 K4me1 K27ac
ENSMUSG00000018322.10	Tomm34	chr2	164063715	164067715	Unmarked
ENSMUSG00000018326.9	Ywhab	chr2	163993502	163997502	K4me3 K27ac
ENSMUSG00000018334.18	Ksr1	chr11	79144407	79148407	K4me3 K27ac
ENSMUSG00000018339.11	Gpx3	chr11	54900771	54904771	K4me3 K4me1 K27ac
ENSMUSG00000018340.13	Anxa6	chr11	55031445	55035445	K4me3 K4me1 K27ac
ENSMUSG00000018347.16	Zkscan6	chr11	65805243	65809243	K4me3 K27ac
ENSMUSG00000018362.14	Kpna2	chr11	106996779	107000779	K4me3 K27ac
ENSMUSG00000018363.16	Smurf2	chr11	106918359	106922359	K4me3 K27ac
ENSMUSG00000018372.13	Cep95	chr11	106812222	106816222	Unmarked
ENSMUSG00000018377.10	Vezf1	chr11	88066278	88070278	K4me3 K27ac
ENSMUSG00000018378.13	Cuedc1	chr11	88185820	88189820	K4me1
ENSMUSG00000018379.17	Srsf1	chr11	88045717	88049717	K4me3 K27ac
ENSMUSG00000018381.15	Abi3	chr11	95840409	95844409	Repressed
ENSMUSG00000018387.12	Shroom1	chr11	53455204	53459204	K4me3 K4me1 K27ac
ENSMUSG00000018395.19	Kif3a	chr11	53565378	53569378	K4me3 K4me1
ENSMUSG00000018398.18	Sept8	chr11	53517745	53521745	K4me3 K27ac
ENSMUSG00000018401.17	Mtmr4	chr11	87590218	87594218	K4me3 K4me1 K27ac
ENSMUSG00000018405.7	Mrm1	chr11	84816734	84820734	K4me3 K27ac
ENSMUSG00000018412.16	Kansl1	chr11	104466861	104470861	K4me3 K27ac
ENSMUSG00000018415.14	Gid4	chr11	60415261	60419261	K4me3 K4me1 K27ac
ENSMUSG00000018417.14	Myo1b	chr1	51765392	51769392	Unmarked
ENSMUSG00000018425.18	Dhx40	chr11	86799088	86803088	Unmarked
ENSMUSG00000018427.8	Ypel2	chr11	86991707	86995707	K4me3 K4me1 K27ac
ENSMUSG00000018428.15	Akap1	chr11	88842498	88846498	Unmarked
ENSMUSG00000018433.14	Nol11	chr11	107187381	107191381	K4me3 K27ac
ENSMUSG00000018442.13	Derl2	chr11	71017242	71021242	K4me3 K27ac
ENSMUSG00000018446.8	C1qbp	chr11	70981026	70985026	K4me3 K4me1 K27ac
ENSMUSG00000018449.12	Rpain	chr11	70968212	70972212	K4me3 K4me1 K27ac
ENSMUSG00000018451.7	6330403K07Rik	chr11	71031513	71035513	K4me3 K4me1
ENSMUSG00000018476.7	Kdm6b	chr11	69411675	69415675	K4me3 K4me1 K27ac
ENSMUSG00000018481.9	Appbp2	chr11	85233130	85237130	K4me3 K4me1 K27ac
ENSMUSG00000018500.2	Adora2b	chr11	62246983	62250983	Bivalent
ENSMUSG00000018501.17	Ncor1	chr11	62455332	62459332	K4me3 K27ac
ENSMUSG00000018507.16	Trpv2	chr11	62573546	62577546	Bivalent
ENSMUSG00000018509.8	Cenpv	chr11	62525896	62529896	Unmarked
ENSMUSG00000018537.16	Pcgf2	chr11	97697641	97701641	K4me3 K4me1 K27ac
ENSMUSG00000018541.10	Cwc25	chr11	97750710	97754710	Unmarked
ENSMUSG00000018547.8	Pip4k2b	chr11	97742704	97746704	K4me3 K4me1 K27ac
ENSMUSG00000018548.15	Trim37	chr11	87188073	87192073	Unmarked
ENSMUSG00000018554.13	Ybx2	chr11	69933795	69937795	K4me3 K4me1
ENSMUSG00000018559.16	Ctdnep1	chr11	69981719	69985719	K4me3 K4me1 K27ac
ENSMUSG00000018565.17	Elp5	chr11	69978211	69982211	K4me3 K4me1 K27ac
ENSMUSG00000018566.14	Slc2a4	chr11	69946145	69950145	K4me3 K4me1
ENSMUSG00000018567.14	Gabarap	chr11	69989683	69993683	K4me3 K27ac
ENSMUSG00000018570.17	2810408A11Rik	chr11	69898957	69902957	K4me3 K4me1 K27ac
ENSMUSG00000018572.10	Phf23	chr11	69995108	69999108	K4me3 K27ac
ENSMUSG00000018574.14	Acadvl	chr11	70013408	70017408	K4me1 K27ac
ENSMUSG00000018583.5	G3bp1	chr11	55467684	55471684	K4me3 K27ac
ENSMUSG00000018585.9	Atox1	chr11	55459239	55463239	K4me3 K4me1 K27ac
ENSMUSG00000018593.13	Sparc	chr11	55417900	55421900	K4me3 K4me1 K27ac
ENSMUSG00000018599.5	Mief2	chr11	60726444	60730444	K4me3 K4me1 K27ac
ENSMUSG00000018604.18	Tbx3	chr5	119668861	119672861	Bivalent
ENSMUSG00000018634.10	Crhr1	chr11	104130854	104134854	Bivalent
ENSMUSG00000018648.15	Dusp14	chr11	84066579	84070579	Bivalent
ENSMUSG00000018651.14	Tada2a	chr11	84091854	84095854	K4me1
ENSMUSG00000018654.17	Ikzf1	chr11	11684444	11688444	Bivalent
ENSMUSG00000018659.12	Pnpo	chr11	96941958	96945958	K4me3 K27ac
ENSMUSG00000018661.17	Cog1	chr11	113657282	113661282	K4me1
ENSMUSG00000018666.13	Cbx1	chr11	96787158	96791158	K4me3 K27ac
ENSMUSG00000018669.14	Cdk5rap3	chr11	96914367	96918367	K4me3 K27ac
ENSMUSG00000018672.15	Copz2	chr11	96851899	96855899	Unmarked
ENSMUSG00000018677.9	Slc25a39	chr11	102402493	102406493	K4me1
ENSMUSG00000018678.13	Sp2	chr11	96980959	96984959	Repressed
ENSMUSG00000018697.14	Aatf	chr11	84489550	84493550	K4me1
ENSMUSG00000018698.15	Lhx1	chr11	84520067	84524067	Bivalent
ENSMUSG00000018707.13	Dync1h1	chr12	110599451	110603451	K4me3 K4me1 K27ac
ENSMUSG00000018733.10	Pex12	chr11	83296897	83300897	K4me3 K27ac
ENSMUSG00000018736.14	Ndel1	chr11	68851135	68855135	K4me3 K27ac
ENSMUSG00000018740.14	Slc25a35	chr11	68966146	68970146	K4me3 K4me1
ENSMUSG00000018750.14	Zbtb4	chr11	69763993	69767993	K4me3 K4me1 K27ac
ENSMUSG00000018752.19	Tnfsfm13	chr11	69693809	69697809	K4me3 K4me1 K27ac
ENSMUSG00000018761.14	Mpdu1	chr11	69656253	69660253	Unmarked
ENSMUSG00000018765.5	Fxr2	chr11	69630989	69634989	K4me3 K27ac
ENSMUSG00000018796.13	Acsl1	chr8	46469036	46473036	K4me3 K27ac
ENSMUSG00000018800.14	Abca5	chr11	110335678	110339678	K4me3 K27ac
ENSMUSG00000018809.2	Smyd4	chr11	75397608	75401608	Unmarked
ENSMUSG00000018819.10	Lsp1	chr7	142487016	142491016	K4me1
ENSMUSG00000018820.13	Zfyve27	chr19	42168566	42172566	K4me3 K4me1 K27ac
ENSMUSG00000018821.3	Avpi1	chr19	42126989	42130989	K4me3 K4me1 K27ac
ENSMUSG00000018830.10	Myh11	chr16	14289363	14293363	K4me3 K4me1
ENSMUSG00000018841.17	Rad51d	chr11	82888589	82892589	K4me3 K4me1 K27ac
ENSMUSG00000018845.14	Unc45b	chr11	82931601	82935601	Bivalent
ENSMUSG00000018846.8	Pank3	chr11	35767483	35771483	K4me3 K27ac
ENSMUSG00000018848.4	Rars	chr11	35818109	35822109	Unmarked
ENSMUSG00000018849.6	Wwc1	chr11	35873712	35877712	K4me1
ENSMUSG00000018858.15	Mrpl58	chr11	115408159	115412159	Unmarked
ENSMUSG00000018861.8	Fdxr	chr11	115274914	115278914	K4me3 K4me1 K27ac
ENSMUSG00000018865.9	Sult4a1	chr15	84103754	84107754	Repressed
ENSMUSG00000018882.12	Mrpl45	chr11	97313715	97317715	K4me1
ENSMUSG00000018899.16	Irf1	chr11	53768486	53772486	K4me3 K27ac
ENSMUSG00000018900.7	Slc22a5	chr11	53889660	53893660	K4me3 K27ac
ENSMUSG00000018906.14	P4ha2	chr11	54099067	54103067	Repressed
ENSMUSG00000018909.15	Arrb1	chr7	99533465	99537465	K4me3 K4me1
ENSMUSG00000018920.11	Cxcl16	chr11	70457984	70461984	Bivalent
ENSMUSG00000018921.11	Pelp1	chr11	70408028	70412028	K4me3 K27ac
ENSMUSG00000018923.13	Med11	chr11	70449918	70453918	K4me3 K27ac
ENSMUSG00000018927.3	Ccl6	chr11	83591087	83595087	Unmarked
ENSMUSG00000018930.3	Ccl4	chr11	83660583	83664583	Unmarked
ENSMUSG00000018931.3	Natd1	chr11	60912750	60916750	K4me3 K4me1
ENSMUSG00000018932.9	Map2k3	chr11	60930065	60934065	K4me3 K4me1
ENSMUSG00000018965.11	Ywhah	chr5	33019790	33023790	K4me1
ENSMUSG00000018974.7	Sart3	chr5	113743595	113747595	Unmarked
ENSMUSG00000018983.9	E2f2	chr4	136178782	136182782	K4me3 K4me1
ENSMUSG00000018986.10	Slfn3	chr11	83206795	83210795	Unmarked
ENSMUSG00000018995.12	Nars2	chr7	97038003	97042003	K4me1
ENSMUSG00000019039.14	Dalrd3	chr9	108567909	108571909	K4me3 K4me1 K27ac
ENSMUSG00000019054.13	Fis1	chr5	136960432	136964432	K4me3 K4me1 K27ac
ENSMUSG00000019055.15	Plod1	chr4	147934767	147938767	K4me3 K4me1
ENSMUSG00000019080.8	Mfsd3	chr15	76700433	76704433	K4me1 K27ac
ENSMUSG00000019082.18	Slc25a22	chr7	141432594	141436594	K4me3 K4me1 K27ac
ENSMUSG00000019122.8	Ccl9	chr11	83575142	83579142	Unmarked
ENSMUSG00000019124.10	Scrn1	chr6	54512817	54516817	Unmarked
ENSMUSG00000019132.11	BC005537	chr13	24800019	24804019	K4me3 K4me1 K27ac
ENSMUSG00000019143.15	Hars2	chr18	36781268	36785268	K4me3 K27ac
ENSMUSG00000019146.2	Cacng2	chr15	78118028	78122028	Bivalent
ENSMUSG00000019158.9	Tmem160	chr7	16450962	16454962	K4me1
ENSMUSG00000019173.11	Rab5c	chr11	100736176	100740176	K4me3 K4me1 K27ac
ENSMUSG00000019178.17	Styxl1	chr5	135776291	135780291	K4me3 K4me1 K27ac
ENSMUSG00000019179.10	Mdh2	chr5	135776479	135780479	K4me3 K4me1 K27ac
ENSMUSG00000019188.16	H13	chr2	152689838	152693838	K4me1 K27ac
ENSMUSG00000019189.13	Rnf145	chr11	44517441	44521441	K4me3 K27ac
ENSMUSG00000019194.15	Scn1b	chr7	31124844	31128844	Bivalent
ENSMUSG00000019210.10	Atp6v1e1	chr6	120820685	120824685	K4me3 K27ac
ENSMUSG00000019214.14	Chtf18	chr17	25717785	25721785	Unmarked
ENSMUSG00000019235.9	Rps6kl1	chr12	85149250	85153250	Bivalent
ENSMUSG00000019254.16	Ppp1r12c	chr7	4480634	4484634	Unmarked
ENSMUSG00000019256.17	Ahr	chr12	35532623	35536623	K4me3 K27ac
ENSMUSG00000019261.3	Map1s	chr8	70903989	70907989	K4me3 K27ac
ENSMUSG00000019295.8	Tmem129	chr5	33655856	33659856	K4me3 K4me1 K27ac
ENSMUSG00000019297.9	Nop9	chr14	55747225	55751225	Unmarked
ENSMUSG00000019301.5	Hsd17b1	chr11	101076410	101080410	Bivalent
ENSMUSG00000019302.16	Atp6v0a1	chr11	101009820	101013820	K4me3 K4me1
ENSMUSG00000019303.14	Psmc3ip	chr11	101093400	101097400	K4me3 K27ac
ENSMUSG00000019312.10	Grb7	chr11	98445047	98449047	K4me3 K4me1 K27ac
ENSMUSG00000019320.14	Noxo1	chr17	24696313	24700313	K4me1 K27ac
ENSMUSG00000019326.14	Aoc3	chr11	101329068	101333068	Unmarked
ENSMUSG00000019338.13	Zfp687	chr3	95013218	95017218	K4me3 K4me1 K27ac
ENSMUSG00000019362.8	D8Ertd738e	chr8	84247719	84251719	K4me3 K27ac
ENSMUSG00000019370.10	Calm3	chr7	16915203	16919203	K4me1 K27ac
ENSMUSG00000019373.11	Cops3	chr11	59837838	59841838	K4me3 K27ac
ENSMUSG00000019428.16	Fkbp8	chr8	70530120	70534120	Unmarked
ENSMUSG00000019432.15	Ddx39b	chr17	35239995	35243995	K4me3 K4me1 K27ac
ENSMUSG00000019433.9	Gipc1	chr8	83650697	83654697	K4me3 K4me1 K27ac
ENSMUSG00000019437.17	Tlcd1	chr11	78174710	78178710	K4me3 K27ac
ENSMUSG00000019461.12	Plscr3	chr11	69844616	69848616	K4me3 K4me1 K27ac
ENSMUSG00000019464.6	Ptger1	chr8	83664832	83668832	K4me1
ENSMUSG00000019470.12	Xab2	chr8	3619302	3623302	K4me3 K27ac
ENSMUSG00000019471.10	Cdc37	chr9	21141194	21145194	Unmarked
ENSMUSG00000019478.16	Rab4a	chr8	123803984	123807984	K4me3 K4me1 K27ac
ENSMUSG00000019487.11	Trip10	chr17	57258969	57262969	Unmarked
ENSMUSG00000019505.7	Ubb	chr11	62549675	62553675	K4me3 K27ac
ENSMUSG00000019518.11	Ap4m1	chr5	138170581	138174581	K4me3 K27ac
ENSMUSG00000019528.18	Gyg	chr3	20153096	20157096	K4me3 K27ac
ENSMUSG00000019564.12	Arid3a	chr10	79928423	79932423	K4me1 K27ac
ENSMUSG00000019578.11	Ubxn6	chr17	56073017	56077017	K4me3 K4me1 K27ac
ENSMUSG00000019579.13	Mydgf	chr17	56181849	56185849	K4me3 K27ac
ENSMUSG00000019590.16	Cyb561	chr11	105942429	105946429	K4me3 K4me1 K27ac
ENSMUSG00000019647.16	Sema6a	chr18	47366868	47370868	K4me3 K27ac
ENSMUSG00000019659.8	Ccdc12	chr9	110664924	110668924	K4me1 K27ac
ENSMUSG00000019689.4	Fmc1	chr6	38531501	38535501	K4me3 K27ac
ENSMUSG00000019699.16	Akt3	chr1	177255592	177259592	K4me3 K27ac
ENSMUSG00000019710.13	Mrpl24	chr3	87917505	87921505	K4me3 K27ac
ENSMUSG00000019715.14	Gle1	chr2	29953506	29957506	Unmarked
ENSMUSG00000019718.8	L3hypdh	chr12	72083018	72087018	K4me3 K4me1 K27ac
ENSMUSG00000019726.12	Lyst	chr13	13588396	13592396	K4me3 K27ac
ENSMUSG00000019731.13	Slc35e1	chr8	72490614	72494614	K4me3 K4me1 K27ac
ENSMUSG00000019732.14	Calr3	chr8	72441870	72445870	K4me1 K27ac
ENSMUSG00000019734.16	Tmc4	chr7	3674793	3678793	K4me3 K27ac
ENSMUSG00000019737.14	Syne4	chr7	30314986	30318986	K4me3 K4me1 K27ac
ENSMUSG00000019738.15	Polr2i	chr7	30230341	30234341	K4me3 K27ac
ENSMUSG00000019756.10	Prl8a1	chr13	27580171	27584171	Unmarked
ENSMUSG00000019761.10	Krt10	chr11	99387364	99391364	Unmarked
ENSMUSG00000019763.11	Rmnd1	chr10	4406105	4410105	Unmarked
ENSMUSG00000019767.12	Ccdc170	chr10	4480501	4484501	K4me1
ENSMUSG00000019768.16	Esr1	chr10	4934525	4938525	Unmarked
ENSMUSG00000019773.7	Fbxo5	chr10	5803600	5807600	K4me3 K27ac
ENSMUSG00000019774.8	Mtrf1l	chr10	5821910	5825910	K4me3 K27ac
ENSMUSG00000019775.17	Rgs17	chr10	5920400	5924400	K4me3 K27ac
ENSMUSG00000019777.16	Hdac2	chr10	36989765	36993765	Unmarked
ENSMUSG00000019779.15	Frk	chr10	34481519	34485519	K4me3 K4me1 K27ac
ENSMUSG00000019782.10	Rwdd1	chr10	33999245	34003245	Unmarked
ENSMUSG00000019789.9	Hey2	chr10	30840015	30844015	Bivalent
ENSMUSG00000019790.17	Stxbp5	chr10	9776309	9780309	Unmarked
ENSMUSG00000019791.12	Hint3	chr10	30616333	30620333	K4me3 K27ac
ENSMUSG00000019792.8	Trmt11	chr10	30598695	30602695	K4me3 K27ac
ENSMUSG00000019794.13	Katna1	chr10	7757771	7761771	Unmarked
ENSMUSG00000019795.17	Pcmt1	chr10	7661261	7665261	K4me3 K27ac
ENSMUSG00000019796.12	Lrp11	chr10	7588126	7592126	K4me3 K27ac
ENSMUSG00000019797.11	1700021F05Rik	chr10	43538968	43542968	K4me3 K4me1 K27ac
ENSMUSG00000019802.13	Sec63	chr10	42815927	42819927	Unmarked
ENSMUSG00000019804.12	Snx3	chr10	42500030	42504030	K4me3 K27ac
ENSMUSG00000019806.13	Aig1	chr10	13866980	13870980	K4me3 K27ac
ENSMUSG00000019808.8	Adat2	chr10	13550893	13554893	K4me3 K27ac
ENSMUSG00000019809.16	Pex3	chr10	13550838	13554838	K4me3 K27ac
ENSMUSG00000019810.15	Fuca2	chr10	13497539	13501539	Unmarked
ENSMUSG00000019813.16	Cep57l1	chr10	41743931	41747931	Unmarked
ENSMUSG00000019814.5	Ltv1	chr10	13191168	13195168	K4me3 K27ac
ENSMUSG00000019817.18	Plagl1	chr10	13088831	13092831	Bivalent
ENSMUSG00000019818.15	Cd164	chr10	41517413	41521413	K4me3 K27ac
ENSMUSG00000019822.12	Smpd2	chr10	41488330	41492330	K4me3 K27ac
ENSMUSG00000019823.17	Mical1	chr10	41476477	41480477	K4me3 K4me1
ENSMUSG00000019826.11	Zbtb24	chr10	41448434	41452434	K4me3 K27ac
ENSMUSG00000019828.13	Grm1	chr10	11080356	11084356	Bivalent
ENSMUSG00000019832.5	Rab32	chr10	10556181	10560181	K4me3 K4me1
ENSMUSG00000019837.8	Gtf3c6	chr10	40256108	40260108	K4me3 K27ac
ENSMUSG00000019838.11	Slc16a10	chr10	40140254	40144254	K4me3 K27ac
ENSMUSG00000019841.15	Rev3l	chr10	39823130	39827130	Unmarked
ENSMUSG00000019842.6	Traf3ip2	chr10	39648554	39652554	Unmarked
ENSMUSG00000019843.14	Fyn	chr10	39366854	39370854	K4me3 K27ac
ENSMUSG00000019845.8	Tube1	chr10	39132067	39136067	K4me3 K27ac
ENSMUSG00000019849.11	Prep	chr10	45065202	45069202	K4me3 K27ac
ENSMUSG00000019850.11	Tnfaip3	chr10	19013657	19017657	K4me3 K27ac
ENSMUSG00000019851.8	Perp	chr10	18843019	18847019	K4me3 K4me1
ENSMUSG00000019853.6	Hebp2	chr10	18543887	18547887	K4me3 K4me1
ENSMUSG00000019854.17	Reps1	chr10	18089467	18093467	Unmarked
ENSMUSG00000019856.14	Fam184a	chr10	53653099	53657099	Unmarked
ENSMUSG00000019857.7	Asf1a	chr10	53595451	53599451	K4me3 K27ac
ENSMUSG00000019861.15	Gopc	chr10	52379718	52383718	K4me3 K4me1 K27ac
ENSMUSG00000019863.7	Qrsl1	chr10	43899745	43903745	K4me3 K27ac
ENSMUSG00000019864.14	Rtn4ip1	chr10	43944616	43948616	Unmarked
ENSMUSG00000019865.9	Nmbr	chr10	14703608	14707608	K4me3 K27ac
ENSMUSG00000019868.16	Vta1	chr10	14703500	14707500	K4me3 K27ac
ENSMUSG00000019872.13	Smpdl3a	chr10	57792373	57796373	K4me3 K4me1 K27ac
ENSMUSG00000019873.8	Reep3	chr10	67032632	67036632	Unmarked
ENSMUSG00000019874.11	Fabp7	chr10	57782922	57786922	K4me1
ENSMUSG00000019876.15	Pkib	chr10	57648980	57652980	Unmarked
ENSMUSG00000019877.10	Serinc1	chr10	57530409	57534409	K4me3 K27ac
ENSMUSG00000019878.8	Hsf2	chr10	57508187	57512187	K4me1
ENSMUSG00000019883.11	Echdc1	chr10	29311499	29315499	K4me3 K27ac
ENSMUSG00000019889.10	Ptprk	chr10	28073009	28077009	K4me3 K27ac
ENSMUSG00000019891.15	Dcbld1	chr10	52231632	52235632	K4me3 K4me1 K27ac
ENSMUSG00000019892.13	Lrriq1	chr10	103234293	103238293	K4me3 K4me1
ENSMUSG00000019893.13	Ros1	chr10	52192956	52196956	Unmarked
ENSMUSG00000019894.14	Slc6a15	chr10	103391449	103395449	Unmarked
ENSMUSG00000019897.8	Ccdc59	chr10	105839503	105843503	K4me3 K27ac
ENSMUSG00000019899.17	Lama2	chr10	27614866	27618866	Bivalent
ENSMUSG00000019905.8	Gprc6a	chr10	51629431	51633431	Unmarked
ENSMUSG00000019906.15	Lin7a	chr10	107269685	107273685	K4me3 K4me1
ENSMUSG00000019907.10	Ppp1r12a	chr10	108160399	108164399	K4me3 K27ac
ENSMUSG00000019913.4	Sim1	chr10	50892753	50896753	K4me3 K27ac
ENSMUSG00000019916.14	P4ha1	chr10	59321295	59325295	K4me3 K27ac
ENSMUSG00000019917.10	Sept10	chr10	59219847	59223847	K4me3 K27ac
ENSMUSG00000019920.18	Lims1	chr10	58392372	58396372	K4me1
ENSMUSG00000019923.14	Zwint	chr10	72652844	72656844	K4me3 K27ac
ENSMUSG00000019927.6	Ube2d1	chr10	71283262	71287262	K4me3 K27ac
ENSMUSG00000019929.16	Dcn	chr10	97481336	97485336	Unmarked
ENSMUSG00000019933.7	Mrln	chr10	70202709	70206709	K4me1 K27ac
ENSMUSG00000019942.13	Cdk1	chr10	69350938	69354938	K4me3 K4me1
ENSMUSG00000019943.10	Atp2b1	chr10	99012968	99016968	Unmarked
ENSMUSG00000019945.10	Cabcoco1	chr10	68523767	68527767	Unmarked
ENSMUSG00000019947.10	Arid5b	chr10	68276721	68280721	K4me3 K27ac
ENSMUSG00000019948.4	Actr6	chr10	89730295	89734295	K4me3 K27ac
ENSMUSG00000019951.10	Uhrf1bp1l	chr10	89742990	89746990	K4me3 K27ac
ENSMUSG00000019952.15	Poc1b	chr10	99127486	99131486	K4me1 K27ac
ENSMUSG00000019960.8	Dusp6	chr10	99263640	99267640	K4me3 K4me1
ENSMUSG00000019961.17	Tmpo	chr10	91169524	91173524	K4me3 K27ac
ENSMUSG00000019966.18	Kitl	chr10	100013825	100017825	Bivalent
ENSMUSG00000019969.14	Psen1	chr12	83686171	83690171	K4me3 K27ac
ENSMUSG00000019970.15	Sgk1	chr10	21976671	21980671	Unmarked
ENSMUSG00000019971.10	Cep290	chr10	100506725	100510725	Unmarked
ENSMUSG00000019975.12	Ikbip	chr10	91080939	91084939	K4me3 K27ac
ENSMUSG00000019977.16	Hbs1l	chr10	21294017	21298017	K4me3 K27ac
ENSMUSG00000019978.16	Epb41l2	chr10	25464972	25468972	Unmarked
ENSMUSG00000019979.12	Apaf1	chr10	91080770	91084770	K4me3 K27ac
ENSMUSG00000019984.16	Med23	chr10	24868097	24872097	K4me3 K4me1
ENSMUSG00000019986.17	Ahi1	chr10	20950546	20954546	K4me3 K27ac
ENSMUSG00000019988.7	Nedd1	chr10	92720404	92724404	K4me3 K27ac
ENSMUSG00000019989.8	Enpp3	chr10	24829806	24833806	K4me1
ENSMUSG00000019990.15	Pde7b	chr10	20546328	20550328	K4me3 K4me1
ENSMUSG00000019992.8	Mtfr2	chr10	20345769	20349769	K4me3 K4me1
ENSMUSG00000019996.17	Map7	chr10	20168987	20172987	K4me3 K4me1 K27ac
ENSMUSG00000019998.6	Stx7	chr10	24147301	24151301	K4me3 K27ac
ENSMUSG00000020000.7	Moxd1	chr10	24221544	24225544	Bivalent
ENSMUSG00000020003.16	Pex7	chr10	19905689	19909689	K4me3 K27ac
ENSMUSG00000020009.13	Ifngr1	chr10	19590052	19594052	K4me3 K4me1
ENSMUSG00000020010.7	Vnn3	chr10	23849461	23853461	Unmarked
ENSMUSG00000020014.17	Cfap54	chr10	92938289	92942289	K4me1
ENSMUSG00000020015.10	Cdk17	chr10	93158889	93162889	K4me3 K27ac
ENSMUSG00000020018.6	Snrpf	chr10	93587706	93591706	K4me3 K27ac
ENSMUSG00000020019.4	Ntn4	chr10	93639048	93643048	Repressed
ENSMUSG00000020021.4	Fgd6	chr10	94070541	94074541	K4me1 K27ac
ENSMUSG00000020022.17	Ndufa12	chr10	94197036	94201036	K4me3 K27ac
ENSMUSG00000020023.18	Tmcc3	chr10	94548851	94552851	K4me1 K27ac
ENSMUSG00000020024.7	Cep83	chr10	94686669	94690669	K4me3 K27ac
ENSMUSG00000020027.18	Socs2	chr10	95414857	95418857	Bivalent
ENSMUSG00000020029.6	Nudt4	chr10	95562146	95566146	K4me3 K27ac
ENSMUSG00000020032.14	Nuak1	chr10	84390388	84394388	K4me1
ENSMUSG00000020034.7	Tcp11l2	chr10	84574625	84578625	K4me3 K4me1 K27ac
ENSMUSG00000020038.10	Cry1	chr10	85183064	85187064	K4me3 K27ac
ENSMUSG00000020042.15	Btbd11	chr10	85627514	85631514	Unmarked
ENSMUSG00000020044.13	Timp3	chr10	86298371	86302371	K4me3 K4me1
ENSMUSG00000020048.13	Hsp90b1	chr10	86703509	86707509	K4me3 K4me1 K27ac
ENSMUSG00000020051.17	Pah	chr10	87544672	87548672	K4me1 K27ac
ENSMUSG00000020056.16	Washc3	chr10	88199092	88203092	K4me3 K27ac
ENSMUSG00000020057.2	Dram1	chr10	88377080	88381080	K4me3 K27ac
ENSMUSG00000020063.16	Sirt1	chr10	63379704	63383704	Repressed
ENSMUSG00000020064.9	Herc4	chr10	63276402	63280402	Unmarked
ENSMUSG00000020069.16	Hnrnph3	chr10	63021894	63025894	K4me3 K27ac
ENSMUSG00000020070.18	Rufy2	chr10	62978292	62982292	K4me3 K27ac
ENSMUSG00000020072.15	Pbld2	chr10	63022314	63026314	K4me3 K27ac
ENSMUSG00000020074.7	Ccar1	chr10	62790231	62794231	K4me3 K27ac
ENSMUSG00000020075.8	Ddx21	chr10	62588971	62592971	Unmarked
ENSMUSG00000020076.7	Ddx50	chr10	62619512	62623512	Unmarked
ENSMUSG00000020077.14	Srgn	chr10	62525425	62529425	Unmarked
ENSMUSG00000020078.16	Vps26a	chr10	62484746	62488746	K4me3 K27ac
ENSMUSG00000020079.15	Supv3l1	chr10	62431127	62435127	Unmarked
ENSMUSG00000020085.15	Aifm2	chr10	61713322	61717322	K4me1
ENSMUSG00000020086.6	Macroh2a2	chr10	61782147	61786147	K4me3 K27ac
ENSMUSG00000020087.5	Tysnd1	chr10	61694646	61698646	K4me3 K27ac
ENSMUSG00000020088.10	Sar1a	chr10	61678298	61682298	K4me3 K27ac
ENSMUSG00000020089.8	Ppa1	chr10	61660687	61664687	Unmarked
ENSMUSG00000020091.15	Eif4ebp2	chr10	61450661	61454661	K4me3 K4me1 K27ac
ENSMUSG00000020092.9	Pald1	chr10	61381530	61385530	K4me3 K4me1 K27ac
ENSMUSG00000020097.14	Sgpl1	chr10	61145644	61149644	K4me3 K27ac
ENSMUSG00000020098.7	Pcbd1	chr10	61087330	61091330	K4me3 K4me1 K27ac
ENSMUSG00000020099.8	Unc5b	chr10	60829382	60833382	Repressed
ENSMUSG00000020100.15	Slc29a3	chr10	60750794	60754794	K4me3 K4me1 K27ac
ENSMUSG00000020101.14	Vsir	chr10	60344850	60348850	K4me1
ENSMUSG00000020102.15	Slc16a7	chr10	125326963	125330963	K4me1
ENSMUSG00000020105.9	Lrig3	chr10	125964252	125968252	K4me3 K4me1
ENSMUSG00000020107.10	Anapc16	chr10	60000995	60004995	K4me3 K4me1 K27ac
ENSMUSG00000020108.4	Ddit4	chr10	59949834	59953834	K4me3 K4me1 K27ac
ENSMUSG00000020109.13	Dnajb12	chr10	59877625	59881625	K4me3 K27ac
ENSMUSG00000020111.15	Micu1	chr10	59700657	59704657	K4me3 K27ac
ENSMUSG00000020114.12	Cand1	chr10	119238055	119242055	K4me3 K4me1 K27ac
ENSMUSG00000020115.3	Tbk1	chr10	121584777	121588777	K4me3 K27ac
ENSMUSG00000020116.7	Pno1	chr11	17209054	17213054	K4me3 K27ac
ENSMUSG00000020120.15	Plek	chr11	17050381	17054381	Bivalent
ENSMUSG00000020121.15	Srgap1	chr10	121821133	121825133	K4me1
ENSMUSG00000020123.6	Avpr1a	chr10	122446498	122450498	Bivalent
ENSMUSG00000020124.10	Usp15	chr10	123194966	123198966	K4me3 K27ac
ENSMUSG00000020128.15	Vps54	chr11	21310504	21314504	Unmarked
ENSMUSG00000020130.9	Tbc1d15	chr10	115249467	115253467	K4me3 K27ac
ENSMUSG00000020131.14	Pcsk4	chr10	80321126	80325126	K4me1
ENSMUSG00000020132.10	Rab21	chr10	115313594	115317594	K4me3 K27ac
ENSMUSG00000020133.8	2310011J03Rik	chr10	80318537	80322537	K4me3 K27ac
ENSMUSG00000020134.13	Peli1	chr11	21090117	21094117	K4me3 K27ac
ENSMUSG00000020135.13	Apc2	chr10	80299819	80303819	Repressed
ENSMUSG00000020137.5	Thap2	chr10	115382443	115386443	K4me3 K27ac
ENSMUSG00000020140.15	Lgr5	chr10	115585759	115589759	Bivalent
ENSMUSG00000020142.12	Slc1a4	chr11	20330684	20334684	K4me3 K27ac
ENSMUSG00000020149.17	Rab1a	chr11	20199438	20203438	K4me3 K27ac
ENSMUSG00000020150.13	Gamt	chr10	80258968	80262968	K4me3 K4me1 K27ac
ENSMUSG00000020151.16	Ptprr	chr10	116016212	116020212	K4me3 K4me1
ENSMUSG00000020152.7	Actr2	chr11	20110867	20114867	K4me3 K4me1 K27ac
ENSMUSG00000020153.14	Ndufs7	chr10	80251314	80255314	K4me1 K27ac
ENSMUSG00000020154.10	Ptprb	chr10	116273522	116277522	Unmarked
ENSMUSG00000020156.16	Pwwp3a	chr10	80232193	80236193	Unmarked
ENSMUSG00000020160.18	Meis1	chr11	19016969	19020969	K4me3 K27ac
ENSMUSG00000020166.15	Cnot2	chr10	116579500	116583500	K4me3 K27ac
ENSMUSG00000020167.14	Tcf3	chr10	80413487	80417487	Unmarked
ENSMUSG00000020171.8	Yeats4	chr10	117222490	117226490	K4me3 K27ac
ENSMUSG00000020173.17	Cobl	chr11	12462960	12466960	K4me3 K4me1
ENSMUSG00000020175.15	Rab36	chr10	75035835	75039835	K4me3 K27ac
ENSMUSG00000020176.17	Grb10	chr11	11968642	11972642	K4me1 K27ac
ENSMUSG00000020178.6	Adora2a	chr10	75314876	75318876	Bivalent
ENSMUSG00000020180.10	Snrpd3	chr10	75516013	75520013	K4me3 K4me1 K27ac
ENSMUSG00000020181.18	Nav3	chr10	109902023	109906023	Unmarked
ENSMUSG00000020183.11	Cpm	chr10	117673892	117677892	Unmarked
ENSMUSG00000020184.15	Mdm2	chr10	117708758	117712758	K4me3 K27ac
ENSMUSG00000020185.16	E2f7	chr10	110743464	110747464	K4me3 K27ac
ENSMUSG00000020186.7	Csrp2	chr10	110918204	110922204	K4me3 K27ac
ENSMUSG00000020189.15	Osbpl8	chr10	111162801	111166801	K4me3 K27ac
ENSMUSG00000020190.13	Mknk2	chr10	80676112	80680112	K4me3 K4me1 K27ac
ENSMUSG00000020193.3	Zpbp	chr11	11460408	11464408	K4me3 K27ac
ENSMUSG00000020196.10	Cabin1	chr10	75762316	75766316	K4me3 K27ac
ENSMUSG00000020198.8	Ap3d1	chr10	80708790	80712790	Unmarked
ENSMUSG00000020205.8	Phlda1	chr10	111504285	111508285	K4me3 K27ac
ENSMUSG00000020211.15	Sf3a2	chr10	80796731	80800731	K4me3 K27ac
ENSMUSG00000020212.14	Mdm1	chr10	118139858	118143858	K4me3 K27ac
ENSMUSG00000020219.7	Timm13	chr10	80898784	80902784	K4me3 K27ac
ENSMUSG00000020220.16	Vps13d	chr4	145153486	145157486	Unmarked
ENSMUSG00000020224.15	Llph	chr10	120225185	120229185	K4me3 K4me1 K27ac
ENSMUSG00000020225.10	Tmbim4	chr10	120200650	120204650	Bivalent
ENSMUSG00000020227.10	Irak3	chr10	120199498	120203498	Bivalent
ENSMUSG00000020228.11	Helb	chr10	120110987	120114987	K4me3 K4me1
ENSMUSG00000020230.15	Prmt2	chr10	76235830	76239830	K4me3 K27ac
ENSMUSG00000020231.15	Dip2a	chr10	76343232	76347232	K4me3 K27ac
ENSMUSG00000020232.17	Hmg20b	chr10	81348443	81352443	K4me3 K27ac
ENSMUSG00000020235.16	Fzr1	chr10	81376380	81380380	K4me3 K4me1 K27ac
ENSMUSG00000020238.14	Ncln	chr10	81486397	81490397	Unmarked
ENSMUSG00000020246.13	Hcfc2	chr10	82697210	82701210	K4me3 K27ac
ENSMUSG00000020248.18	Nfyb	chr10	82761646	82765646	K4me3 K27ac
ENSMUSG00000020250.10	Txnrd1	chr10	82857258	82861258	K4me3 K4me1 K27ac
ENSMUSG00000020251.13	Glt8d2	chr10	82688617	82692617	K4me1
ENSMUSG00000020253.15	Ppm1m	chr9	106197106	106201106	K4me3 K4me1
ENSMUSG00000020255.8	D10Wsu102e	chr10	83358220	83362220	K4me3 K27ac
ENSMUSG00000020257.13	Wdr82	chr9	106169209	106173209	K4me3 K27ac
ENSMUSG00000020258.16	Glyctk	chr9	106155250	106159250	K4me1 K27ac
ENSMUSG00000020260.9	Pofut2	chr10	77263330	77267330	Unmarked
ENSMUSG00000020262.15	Adarb1	chr10	77416217	77420217	Bivalent
ENSMUSG00000020267.6	Hint1	chr11	54864480	54868480	K4me3 K27ac
ENSMUSG00000020268.14	Lyrm7	chr11	54858912	54862912	K4me3 K27ac
ENSMUSG00000020271.17	Fbxw11	chr11	32640865	32644865	K4me3 K4me1 K27ac
ENSMUSG00000020272.8	Stk10	chr11	32531304	32535304	K4me3 K27ac
ENSMUSG00000020273.13	Papolg	chr11	23893253	23897253	K4me3 K27ac
ENSMUSG00000020275.9	Rel	chr11	23768970	23772970	K4me3 K27ac
ENSMUSG00000020277.10	Pfkl	chr10	78008083	78012083	K4me3 K27ac
ENSMUSG00000020280.12	Pus10	chr11	23664187	23668187	K4me3 K27ac
ENSMUSG00000020282.18	Rhbdf1	chr11	32215317	32219317	K4me1
ENSMUSG00000020283.5	Pex13	chr11	23663959	23667959	K4me3 K27ac
ENSMUSG00000020284.16	Cfap410	chr10	77979761	77983761	Unmarked
ENSMUSG00000020287.15	Mpg	chr11	32224538	32228538	K4me1 K27ac
ENSMUSG00000020288.13	Ahsa2	chr11	23490306	23494306	Unmarked
ENSMUSG00000020289.15	Nprl3	chr11	32265547	32269547	K4me3 K27ac
ENSMUSG00000020290.14	Xpo1	chr11	23254040	23258040	K4me3 K27ac
ENSMUSG00000020297.10	Nsg2	chr11	31998462	32002462	K4me1
ENSMUSG00000020300.14	Cpeb4	chr11	31870210	31874210	K4me3 K27ac
ENSMUSG00000020303.2	Stc2	chr11	31366166	31370166	K4me3 K4me1
ENSMUSG00000020305.13	Asb3	chr11	30952447	30956447	K4me3 K27ac
ENSMUSG00000020307.15	Cdc34	chr10	79680525	79684525	K4me3 K4me1 K27ac
ENSMUSG00000020308.6	Tpgs1	chr10	79667368	79671368	K4me3 K4me1 K27ac
ENSMUSG00000020309.6	Chac2	chr11	30984334	30988334	K4me3 K27ac
ENSMUSG00000020311.17	Erlec1	chr11	30952152	30956152	K4me3 K27ac
ENSMUSG00000020312.12	Shc2	chr10	79620724	79624724	K4me1 K27ac
ENSMUSG00000020315.18	Sptbn1	chr11	30266169	30270169	K4me3 K4me1
ENSMUSG00000020319.9	Wdpcp	chr11	21811398	21815398	Unmarked
ENSMUSG00000020321.16	Mdh1	chr11	21557729	21561729	Unmarked
ENSMUSG00000020325.10	Fstl3	chr10	79775291	79779291	K4me3 K4me1
ENSMUSG00000020326.7	Ccng1	chr11	40753311	40757311	K4me1
ENSMUSG00000020328.10	Nudcd2	chr11	40732204	40736204	K4me3 K27ac
ENSMUSG00000020329.12	Polrmt	chr10	79737374	79741374	Unmarked
ENSMUSG00000020330.16	Hmmr	chr11	40731416	40735416	K4me3 K27ac
ENSMUSG00000020331.9	Hcn2	chr10	79714633	79718633	Bivalent
ENSMUSG00000020333.17	Acsl6	chr11	54312935	54316935	K4me1 K27ac
ENSMUSG00000020334.6	Slc22a4	chr11	54025952	54029952	Bivalent
ENSMUSG00000020335.13	Zfp354b	chr11	50928649	50932649	K4me3 K27ac
ENSMUSG00000020340.16	Cyfip2	chr11	46310220	46314220	K4me3 K4me1 K27ac
ENSMUSG00000020346.16	Mgat1	chr11	49248511	49252511	K4me3 K27ac
ENSMUSG00000020349.4	Ppp2ca	chr11	52096680	52100680	K4me3 K4me1 K27ac
ENSMUSG00000020354.15	Sgcd	chr11	47635469	47639469	Unmarked
ENSMUSG00000020357.3	Flt4	chr11	49607262	49611262	Bivalent
ENSMUSG00000020358.17	Hnrnpab	chr11	51604847	51608847	K4me3 K27ac
ENSMUSG00000020359.13	Phykpl	chr11	51582756	51586756	K4me3 K4me1 K27ac
ENSMUSG00000020361.13	Hspa4	chr11	53298411	53302411	K4me3 K4me1 K27ac
ENSMUSG00000020362.13	Cnot6	chr11	49700632	49704632	Unmarked
ENSMUSG00000020363.6	Gfpt2	chr11	49792186	49796186	K4me3 K4me1
ENSMUSG00000020364.14	Zfp354a	chr11	51057293	51061293	Unmarked
ENSMUSG00000020366.18	Mapk9	chr11	49844750	49848750	K4me3 K4me1 K27ac
ENSMUSG00000020368.15	Canx	chr11	50296319	50300319	Unmarked
ENSMUSG00000020372.15	Rack1	chr11	48801151	48805151	Unmarked
ENSMUSG00000020374.16	Rasgef1c	chr11	49899834	49903834	Bivalent
ENSMUSG00000020375.9	Rufy1	chr11	50429125	50433125	K4me3 K27ac
ENSMUSG00000020376.17	Rnf130	chr11	50023347	50027347	K4me3 K27ac
ENSMUSG00000020380.16	Rad50	chr11	53705295	53709295	K4me3 K4me1
ENSMUSG00000020381.10	Mrnip	chr11	50172443	50176443	K4me3 K27ac
ENSMUSG00000020385.16	Clk4	chr11	51261185	51265185	K4me3 K4me1 K27ac
ENSMUSG00000020386.5	Sar1b	chr11	51761693	51765693	K4me3 K27ac
ENSMUSG00000020387.15	Jade2	chr11	51855125	51859125	K4me3 K4me1 K27ac
ENSMUSG00000020388.12	Pdlim4	chr11	54062796	54066796	K4me1
ENSMUSG00000020389.19	Cdkl3	chr11	52031526	52035526	Unmarked
ENSMUSG00000020390.12	Ube2b	chr11	51998762	52002762	K4me3 K4me1 K27ac
ENSMUSG00000020392.8	Cdkn2aipnl	chr11	51965660	51969660	Unmarked
ENSMUSG00000020393.16	Kremen1	chr11	5236448	5240448	K4me1 K27ac
ENSMUSG00000020397.15	Med7	chr11	46435004	46439004	K4me3 K27ac
ENSMUSG00000020399.14	Havcr2	chr11	46452934	46456934	Unmarked
ENSMUSG00000020400.17	Tnip1	chr11	54954087	54958087	K4me3 K27ac
ENSMUSG00000020402.11	Vdac1	chr11	52385196	52389196	Unmarked
ENSMUSG00000020407.13	Upp1	chr11	9123682	9127682	K4me1
ENSMUSG00000020409.10	Slu7	chr11	43431743	43435743	K4me3 K27ac
ENSMUSG00000020412.16	Ascc2	chr11	4635746	4639746	K4me3 K4me1 K27ac
ENSMUSG00000020413.11	Hus1	chr11	9009164	9013164	K4me3 K27ac
ENSMUSG00000020415.16	Pttg1	chr11	43424227	43428227	K4me3 K27ac
ENSMUSG00000020420.8	Zfp607a	chr7	27858584	27862584	K4me3 K4me1 K27ac
ENSMUSG00000020422.14	Tns3	chr11	8622887	8626887	K4me3 K4me1
ENSMUSG00000020423.6	Btg2	chr1	134077120	134081120	K4me3 K27ac
ENSMUSG00000020424.3	Castor1	chr11	4216224	4220224	Repressed
ENSMUSG00000020427.11	Igfbp3	chr11	7211897	7215897	Bivalent
ENSMUSG00000020430.12	Pes1	chr11	3961974	3965974	K4me3 K27ac
ENSMUSG00000020431.5	Adcy1	chr11	7157881	7161881	K4me1
ENSMUSG00000020434.4	4921536K21Rik	chr11	3893098	3897098	K4me3 K4me1 K27ac
ENSMUSG00000020435.17	Osbp2	chr11	3861903	3865903	Repressed
ENSMUSG00000020436.17	Gabrg2	chr11	41914623	41918623	Unmarked
ENSMUSG00000020437.12	Myo1g	chr11	6518897	6522897	Unmarked
ENSMUSG00000020439.17	Smtn	chr11	3525937	3529937	Unmarked
ENSMUSG00000020440.13	Arf5	chr6	28421589	28425589	K4me3 K4me1 K27ac
ENSMUSG00000020441.6	2310033P09Rik	chr11	59206320	59210320	K4me3 K4me1 K27ac
ENSMUSG00000020444.19	Guk1	chr11	59182854	59186854	Unmarked
ENSMUSG00000020448.16	Rnf185	chr11	3450363	3454363	K4me3 K27ac
ENSMUSG00000020451.17	Limk2	chr11	3354141	3358141	Unmarked
ENSMUSG00000020453.17	Patz1	chr11	3287280	3291280	K4me3 K4me1 K27ac
ENSMUSG00000020454.17	Eif4enif1	chr11	3201020	3205020	K4me3 K27ac
ENSMUSG00000020455.16	Trim11	chr11	58976092	58980092	K4me3 K27ac
ENSMUSG00000020456.17	Ogdh	chr11	6289632	6293632	K4me3 K4me1 K27ac
ENSMUSG00000020457.13	Drg1	chr11	3260536	3264536	Unmarked
ENSMUSG00000020458.16	Rtn4	chr11	29716562	29720562	K4me1
ENSMUSG00000020459.14	Mtif2	chr11	29524449	29528449	K4me3 K27ac
ENSMUSG00000020460.15	Rps27a	chr11	29545891	29549891	K4me3 K27ac
ENSMUSG00000020461.10	Clhc1	chr11	29545949	29549949	K4me3 K27ac
ENSMUSG00000020462.14	Cfap36	chr11	29245068	29249068	K4me3 K27ac
ENSMUSG00000020463.15	Ppp4r3b	chr11	29170889	29174889	K4me3 K27ac
ENSMUSG00000020464.15	Pnpt1	chr11	29136186	29140186	Unmarked
ENSMUSG00000020467.15	Efemp1	chr11	28851243	28855243	K4me3 K4me1
ENSMUSG00000020469.8	Myl7	chr11	5896782	5900782	K4me1
ENSMUSG00000020471.11	Pold2	chr11	5875662	5879662	K4me1
ENSMUSG00000020472.14	Zkscan17	chr11	59504220	59508220	K4me3 K4me1 K27ac
ENSMUSG00000020473.13	Aebp1	chr11	5867147	5871147	Unmarked
ENSMUSG00000020474.11	Polm	chr11	5835752	5839752	K4me3 K27ac
ENSMUSG00000020476.14	Dbnl	chr11	5786487	5790487	K4me3 K4me1 K27ac
ENSMUSG00000020477.10	Mrps24	chr11	5705690	5709690	K4me1 K27ac
ENSMUSG00000020482.4	Ccdc117	chr11	5540187	5544187	K4me3 K27ac
ENSMUSG00000020483.14	Dynll2	chr11	87982012	87986012	K4me3 K4me1 K27ac
ENSMUSG00000020484.19	Xbp1	chr11	5518994	5522994	K4me3 K27ac
ENSMUSG00000020485.14	Supt4a	chr11	87735551	87739551	K4me3 K27ac
ENSMUSG00000020486.19	Sept4	chr11	87579060	87583060	Unmarked
ENSMUSG00000020491.15	2810021J22Rik	chr11	58865215	58869215	K4me3 K4me1 K27ac
ENSMUSG00000020492.11	Ska2	chr11	87113868	87117868	Unmarked
ENSMUSG00000020493.8	Prr11	chr11	87106708	87110708	K4me3 K27ac
ENSMUSG00000020495.13	Smg8	chr11	87083382	87087382	K4me3 K27ac
ENSMUSG00000020496.9	Rnf187	chr11	58936784	58940784	K4me3 K27ac
ENSMUSG00000020513.15	Tubd1	chr11	86542990	86546990	K4me3 K27ac
ENSMUSG00000020514.8	Mrpl22	chr11	58169675	58173675	K4me3 K27ac
ENSMUSG00000020515.13	Cnot8	chr11	58112026	58116026	Unmarked
ENSMUSG00000020516.15	Rps6kb1	chr11	86542774	86546774	K4me3 K27ac
ENSMUSG00000020519.5	Sap30l	chr11	57799636	57803636	K4me3 K4me1 K27ac
ENSMUSG00000020520.14	Galnt10	chr11	57643464	57647464	K4me3 K27ac
ENSMUSG00000020521.7	Rnft1	chr11	86482684	86486684	K4me3 K27ac
ENSMUSG00000020522.13	Mfap3	chr11	57516663	57520663	K4me3 K27ac
ENSMUSG00000020523.14	Fam114a2	chr11	57516617	57520617	K4me3 K27ac
ENSMUSG00000020525.17	Ppm1d	chr11	85310163	85314163	K4me3 K27ac
ENSMUSG00000020526.12	Znhit3	chr11	84914366	84918366	K4me3 K27ac
ENSMUSG00000020527.14	Myo19	chr11	84878147	84882147	K4me3 K27ac
ENSMUSG00000020530.14	Ggnbp2	chr11	84856494	84860494	Unmarked
ENSMUSG00000020532.18	Acaca	chr11	84127699	84131699	K4me3 K27ac
ENSMUSG00000020534.14	Shmt1	chr11	60805021	60809021	K4me1 K27ac
ENSMUSG00000020536.12	Llgl1	chr11	60702196	60706196	K4me1 K27ac
ENSMUSG00000020537.9	Drg2	chr11	60452590	60456590	K4me3 K4me1 K27ac
ENSMUSG00000020538.15	Srebf1	chr11	60220581	60224581	K4me1 K27ac
ENSMUSG00000020541.12	Tom1l1	chr11	90661312	90665312	K4me1 K27ac
ENSMUSG00000020544.14	Cox11	chr11	90636172	90640172	K4me3 K27ac
ENSMUSG00000020546.14	Stxbp4	chr11	90628917	90632917	Unmarked
ENSMUSG00000020547.5	Bzw2	chr12	36154751	36158751	K4me3 K27ac
ENSMUSG00000020549.14	Elac2	chr11	64977090	64981090	K4me3 K27ac
ENSMUSG00000020553.8	Pctp	chr11	90000894	90004894	K4me3 K4me1
ENSMUSG00000020561.8	Twistnb	chr12	33428068	33432068	K4me3 K27ac
ENSMUSG00000020562.7	Efcab10	chr12	33392853	33396853	K4me3 K4me1 K27ac
ENSMUSG00000020564.17	Atxn7l1	chr12	33365323	33369323	Unmarked
ENSMUSG00000020570.15	Sypl	chr12	32952183	32956183	K4me3 K27ac
ENSMUSG00000020571.12	Pdia6	chr12	17275240	17279240	Unmarked
ENSMUSG00000020572.8	Nampt	chr12	32817544	32821544	K4me3 K27ac
ENSMUSG00000020573.17	Pik3cg	chr12	32176454	32180454	Unmarked
ENSMUSG00000020576.10	Nbas	chr12	13485121	13489121	Unmarked
ENSMUSG00000020577.17	Tspan13	chr12	36040500	36044500	K4me3 K27ac
ENSMUSG00000020580.10	Rock2	chr12	16893166	16897166	K4me3 K27ac
ENSMUSG00000020585.4	Laptm4a	chr12	8919663	8923663	K4me3 K27ac
ENSMUSG00000020589.17	Fam49a	chr12	12260182	12264182	K4me1
ENSMUSG00000020590.16	Snx13	chr12	35045185	35049185	K4me3 K27ac
ENSMUSG00000020592.14	Sdc1	chr12	8769802	8773802	K4me3 K4me1 K27ac
ENSMUSG00000020593.16	Lpin1	chr12	16602113	16606113	Unmarked
ENSMUSG00000020594.14	Pum2	chr12	8672764	8676764	K4me3 K27ac
ENSMUSG00000020598.16	Nrcam	chr12	44437041	44441041	Unmarked
ENSMUSG00000020599.13	Rgs9	chr11	109296066	109300066	K4me3 K4me1
ENSMUSG00000020601.8	Trib2	chr12	15814785	15818785	Bivalent
ENSMUSG00000020604.13	Arsg	chr11	109471373	109475373	K4me3 K27ac
ENSMUSG00000020605.9	Hs1bp3	chr12	8311431	8315431	K4me3 K4me1
ENSMUSG00000020607.7	Lratd1	chr12	14149349	14153349	Bivalent
ENSMUSG00000020608.7	Smc6	chr12	11298655	11302655	Unmarked
ENSMUSG00000020609.14	Apob	chr12	7975647	7979647	Unmarked
ENSMUSG00000020610.17	Amz2	chr11	109424225	109428225	K4me3 K4me1 K27ac
ENSMUSG00000020611.14	Gna13	chr11	109360830	109364830	K4me3 K27ac
ENSMUSG00000020612.16	Prkar1a	chr11	109648574	109652574	K4me3 K4me1 K27ac
ENSMUSG00000020614.13	Fam20a	chr11	109720279	109724279	Bivalent
ENSMUSG00000020620.14	Abca8b	chr11	109993845	109997845	K4me1 K27ac
ENSMUSG00000020621.6	Rdh14	chr12	10388771	10392771	K4me3 K27ac
ENSMUSG00000020627.10	Klhl29	chr12	5373682	5377682	Bivalent
ENSMUSG00000020628.16	Trappc12	chr12	28699609	28703609	K4me1 K27ac
ENSMUSG00000020630.9	Rnaseh1	chr12	28651116	28655116	Unmarked
ENSMUSG00000020634.12	Ubxn2a	chr12	4905705	4909705	K4me3 K27ac
ENSMUSG00000020635.8	Fkbp1b	chr12	4839435	4843435	K4me3 K4me1
ENSMUSG00000020638.8	Cmpk2	chr12	26471929	26475929	Unmarked
ENSMUSG00000020639.14	Pfn4	chr12	4767338	4771338	K4me3 K27ac
ENSMUSG00000020640.10	Itsn2	chr12	4611211	4615211	Unmarked
ENSMUSG00000020641.16	Rsad2	chr12	26454431	26458431	K4me3 K4me1 K27ac
ENSMUSG00000020642.13	Rnf144a	chr12	26308386	26312386	Unmarked
ENSMUSG00000020644.9	Id2	chr12	25095140	25099140	K4me3 K4me1 K27ac
ENSMUSG00000020646.17	Mboat2	chr12	24829622	24833622	K4me3 K27ac
ENSMUSG00000020647.10	Ncoa1	chr12	4261578	4265578	Unmarked
ENSMUSG00000020648.3	Dus4l	chr12	31652806	31656806	K4me3 K27ac
ENSMUSG00000020649.11	Rrm2	chr12	24707028	24711028	K4me3 K4me1
ENSMUSG00000020652.17	Cenpo	chr12	4231938	4235938	K4me3 K27ac
ENSMUSG00000020654.15	Adcy3	chr12	4131103	4135103	Bivalent
ENSMUSG00000020656.16	Grhl1	chr12	24570286	24574286	Bivalent
ENSMUSG00000020657.16	Dnajc27	chr12	4080628	4084628	K4me3 K27ac
ENSMUSG00000020658.10	Efr3b	chr12	4036791	4040791	K4me3 K27ac
ENSMUSG00000020659.16	Cbll1	chr12	31497616	31501616	K4me3 K4me1 K27ac
ENSMUSG00000020660.6	Pomc	chr12	3952968	3956968	Repressed
ENSMUSG00000020661.15	Dnmt3a	chr12	3889743	3893743	K4me3 K4me1 K27ac
ENSMUSG00000020664.10	Dld	chr12	31349453	31353453	K4me3 K27ac
ENSMUSG00000020668.10	Kif3c	chr12	3398084	3402084	Unmarked
ENSMUSG00000020669.15	Sh3yl1	chr12	30909667	30913667	K4me3 K27ac
ENSMUSG00000020671.9	Rab10	chr12	3307969	3311969	K4me3 K27ac
ENSMUSG00000020672.14	Sntg2	chr12	30371328	30375328	K4me3 K4me1
ENSMUSG00000020674.17	Pxdn	chr12	29936035	29940035	K4me3 K27ac
ENSMUSG00000020676.2	Ccl11	chr11	82055822	82059822	Unmarked
ENSMUSG00000020677.7	Ddx52	chr11	83940061	83944061	K4me3 K27ac
ENSMUSG00000020680.15	Taf15	chr11	83471091	83475091	K4me3 K27ac
ENSMUSG00000020681.14	Ace	chr11	105965944	105969944	Bivalent
ENSMUSG00000020682.17	Mmp28	chr11	83460992	83464992	Bivalent
ENSMUSG00000020687.13	Cdc27	chr11	104548483	104552483	K4me3 K27ac
ENSMUSG00000020689.4	Itgb3	chr11	104635388	104639388	Unmarked
ENSMUSG00000020691.13	Mettl2	chr11	105124478	105128478	K4me3 K27ac
ENSMUSG00000020692.14	Nle1	chr11	82902268	82906268	Unmarked
ENSMUSG00000020694.17	Tlk2	chr11	105179998	105183998	K4me3 K27ac
[truncated: 13,201 more rows]

## Sheet: Downregulated Islet
geneID	geneSymbol	Chr	Start	End	Chromatin State
ENSMUSG00000000159.16	Igsf5	chr16	96359793	96363793	K4me3 K4me1 K27ac
ENSMUSG00000000214.11	Th	chr7	142894609	142898609	K4me1 K27ac
ENSMUSG00000000215.11	Ins2	chr7	142677685	142681685	K4me3 K27ac
ENSMUSG00000000216.8	Scnn1g	chr7	121732478	121736478	K4me3
ENSMUSG00000000263.15	Glra1	chr11	55605821	55609821	Repressed
ENSMUSG00000000303.12	Cdh1	chr8	106602142	106606142	K4me3 K4me1 K27ac
ENSMUSG00000000394.15	Gcg	chr2	62481645	62485645	Bivalent
ENSMUSG00000000544.14	Gpa33	chr1	166128339	166132339	Unmarked
ENSMUSG00000001334.9	Fndc5	chr4	129134998	129138998	K4me3
ENSMUSG00000001583.13	Tnk1	chr11	69856708	69860708	K4me3 K27ac
ENSMUSG00000001663.10	Gstt1	chr10	75796584	75800584	K4me3 K27ac
ENSMUSG00000001670.13	Tat	chr8	109988436	109992436	K4me1
ENSMUSG00000001700.10	Gramd3	chr18	56398374	56402374	K4me3 K27ac
ENSMUSG00000002020.15	Ltbp2	chr12	84789843	84793843	Unmarked
ENSMUSG00000002059.18	Rab34	chr11	78188352	78192352	K4me3 K27ac
ENSMUSG00000002147.18	Stat6	chr10	127641001	127645001	K4me3 K27ac
ENSMUSG00000002265.17	Peg3	chr7	6728421	6732421	K4me3 K27ac
ENSMUSG00000002266.17	Zim1	chr7	6694429	6698429	K4me3 K27ac
ENSMUSG00000002324.8	Rec8	chr14	55616036	55620036	K4me3 K27ac
ENSMUSG00000002771.12	Grin2d	chr7	45865129	45869129	Unmarked
ENSMUSG00000002799.6	Jag2	chr12	112926448	112930448	Unmarked
ENSMUSG00000002908.17	Kcnn1	chr8	70861258	70865258	K4me3
ENSMUSG00000002930.6	Ppp1r17	chr6	56015496	56019496	Unmarked
ENSMUSG00000003070.6	Efna2	chr10	80177481	80181481	K4me1
ENSMUSG00000003355.7	Fkbp11	chr15	98726152	98730152	K4me3 K4me1
ENSMUSG00000003411.10	Rab3b	chr4	108877062	108881062	K4me3 K4me1
ENSMUSG00000003534.17	Ddr1	chr17	35698610	35702610	K4me3 K27ac
ENSMUSG00000003559.8	As3mt	chr19	46705917	46709917	K4me3 K27ac
ENSMUSG00000003865.16	Gys1	chr7	45445604	45449604	Unmarked
ENSMUSG00000004035.12	Gstm7	chr3	107929610	107933610	K4me3
ENSMUSG00000004151.17	Etv1	chr12	38781508	38785508	K4me3 K4me1 K27ac
ENSMUSG00000004267.16	Eno2	chr6	124766331	124770331	K4me3 K27ac
ENSMUSG00000004347.17	Pde1c	chr6	56360392	56364392	K4me3 K4me1 K27ac
ENSMUSG00000004366.4	Sst	chr16	23888958	23892958	Repressed
ENSMUSG00000004791.7	Pgf	chr12	85174274	85178274	K4me3 K4me1
ENSMUSG00000004864.13	Mapk13	chr17	28767371	28771371	K4me3
ENSMUSG00000005087.17	Cd44	chr2	102899369	102903369	K4me3 K27ac
ENSMUSG00000005148.8	Klf5	chr14	99297153	99301153	K4me3 K27ac
ENSMUSG00000005373.13	Mlxipl	chr5	135104912	135108912	K4me3 K27ac
ENSMUSG00000005514.14	Por	chr5	135723727	135727727	K4me1 K27ac
ENSMUSG00000006411.12	Nectin4	chr1	171368351	171372351	Unmarked
ENSMUSG00000006527.16	Sfmbt1	chr14	30713166	30717166	K4me3 K27ac
ENSMUSG00000006529.16	Itih1	chr14	30941289	30945289	K4me1
ENSMUSG00000007594.10	Hapln4	chr8	70081456	70085456	K4me3
ENSMUSG00000007783.10	Cpt1c	chr7	44971077	44975077	Unmarked
ENSMUSG00000008153.12	Clstn3	chr6	124455885	124459885	Unmarked
ENSMUSG00000008206.16	Cers4	chr8	4491198	4495198	K4me3 K27ac
ENSMUSG00000008393.9	Carhsp1	chr16	8670155	8674155	K4me3 K27ac
ENSMUSG00000008601.12	Rab25	chr3	88541514	88545514	Unmarked
ENSMUSG00000009092.5	Derl3	chr10	75891412	75895412	K4me3
ENSMUSG00000009108.15	Gnat2	chr3	108090879	108094879	Unmarked
ENSMUSG00000009246.14	Trpm5	chr7	143092642	143096642	Unmarked
ENSMUSG00000009292.18	Trpm2	chr10	77967804	77971804	K4me1
ENSMUSG00000009378.4	Slc16a12	chr19	34689547	34693547	K4me1 K27ac
ENSMUSG00000010066.15	Cacna2d2	chr9	107398068	107402068	Repressed
ENSMUSG00000010505.16	Myt1	chr2	181761331	181765331	K4me3 K4me1 K27ac
ENSMUSG00000011382.8	Dhdh	chr7	45485402	45489402	K4me3 K27ac
ENSMUSG00000012350.15	Ehf	chr2	103301278	103305278	K4me3 K4me1 K27ac
ENSMUSG00000013076.17	Amotl1	chr9	14643056	14647056	Unmarked
ENSMUSG00000013419.7	Zfp651	chr9	121762016	121766016	Unmarked
ENSMUSG00000013921.15	Clip3	chr7	30289957	30293957	K4me3
ENSMUSG00000014602.15	Kif1a	chr1	93052302	93056302	Unmarked
ENSMUSG00000014791.10	Elmo3	chr8	105303642	105307642	K4me3 K27ac
ENSMUSG00000015112.15	Slc25a13	chr6	6189319	6193319	Unmarked
ENSMUSG00000015363.13	Trabd	chr15	89073123	89077123	K4me3 K27ac
ENSMUSG00000015533.9	Itga2	chr13	114899943	114903943	Unmarked
ENSMUSG00000015942.9	Gtf2ird2	chr5	134212108	134216108	Unmarked
ENSMUSG00000016256.10	Ctsz	chr2	174437039	174441039	K4me3 K4me1
ENSMUSG00000016552.13	Foxred2	chr15	77954722	77958722	K4me3
ENSMUSG00000016758.4	Bik	chr15	83531543	83535543	Unmarked
ENSMUSG00000017311.15	Pyy	chr11	102105822	102109822	Bivalent
ENSMUSG00000017316.13	Ppy	chr11	102099310	102103310	K4me3
ENSMUSG00000017740.17	Slc12a5	chr2	164965982	164969982	Unmarked
ENSMUSG00000017756.9	Slc12a7	chr13	73761738	73765738	K4me3 K27ac
ENSMUSG00000018168.8	Ikzf3	chr11	98544031	98548031	Repressed
ENSMUSG00000018470.8	Kcnab3	chr11	69324257	69328257	K4me3
ENSMUSG00000018474.18	Chd3	chr11	69345134	69349134	Unmarked
ENSMUSG00000018569.12	Cldn7	chr11	69964917	69968917	K4me3 K27ac
ENSMUSG00000018581.15	Dnah11	chr12	117913964	117917964	Repressed
ENSMUSG00000018822.7	Sfrp5	chr19	42200252	42204252	K4me3 K4me1
ENSMUSG00000018999.14	Slc35b4	chr6	34161482	34165482	K4me1 K27ac
ENSMUSG00000019027.8	Dnah1	chr14	31267511	31271511	Unmarked
ENSMUSG00000019066.13	Rab3d	chr9	21916192	21920192	K4me3 K27ac
ENSMUSG00000019368.13	Sec14l4	chr11	4029782	4033782	K4me3
ENSMUSG00000019429.7	Ffar3	chr7	30854178	30858178	K4me1
ENSMUSG00000019467.15	Arhgef25	chr10	127187833	127191833	K4me3 K4me1
ENSMUSG00000019539.11	Rcn3	chr7	45086607	45090607	Unmarked
ENSMUSG00000019577.6	Pdk4	chr6	5494309	5498309	K4me3
ENSMUSG00000019820.11	Utrn	chr10	12686862	12690862	Unmarked
ENSMUSG00000019852.7	Arfgef3	chr10	18741753	18745753	K4me3 K27ac
ENSMUSG00000019866.15	Crybg1	chr10	44002369	44006369	K4me3 K4me1
ENSMUSG00000019900.19	Rfx6	chr10	51675755	51679755	K4me3 K27ac
ENSMUSG00000019944.14	Rhobtb1	chr10	69206551	69210551	K4me1
ENSMUSG00000019987.9	Arg1	chr10	24925484	24929484	K4me3 K4me1
ENSMUSG00000020122.16	Egfr	chr11	16903184	16907184	Unmarked
ENSMUSG00000020170.4	Frs2	chr10	117146510	117150510	K4me3 K4me1
ENSMUSG00000020182.16	Ddc	chr11	11888401	11892401	K4me3 K4me1 K27ac
ENSMUSG00000020256.14	Aldh1l2	chr10	83506120	83510120	Unmarked
ENSMUSG00000020261.15	Slc36a1	chr11	55202349	55206349	Repressed
ENSMUSG00000020263.14	Appl2	chr10	83609102	83613102	Unmarked
ENSMUSG00000020265.16	Sumo3	chr10	77604224	77608224	K4me3 K27ac
ENSMUSG00000020432.12	Tcn2	chr11	3930078	3934078	K4me3
ENSMUSG00000020528.14	Prpsap2	chr11	61760012	61764012	K4me3
ENSMUSG00000020629.12	Adi1	chr12	28673230	28677230	K4me3 K4me1 K27ac
ENSMUSG00000020653.12	Klf11	chr12	24650153	24654153	K4me3 K4me1 K27ac
ENSMUSG00000020679.11	Hnf1b	chr11	83848062	83852062	K4me3 K27ac
ENSMUSG00000020715.9	Ern1	chr11	106485808	106489808	K4me3 K27ac
ENSMUSG00000020728.17	Cep112	chr11	108423290	108427290	K4me3
ENSMUSG00000020732.13	Rab37	chr11	115152156	115156156	K4me3 K27ac
ENSMUSG00000020734.13	Grin2c	chr11	115263429	115267429	Bivalent
ENSMUSG00000020788.15	Atp2a3	chr11	72959168	72963168	K4me3 K27ac
ENSMUSG00000020847.15	Rph3al	chr11	75923891	75927891	K4me3 K27ac
ENSMUSG00000020882.17	Cacnb1	chr11	98020634	98024634	K4me3
ENSMUSG00000020886.17	Dlg4	chr11	70014941	70018941	K4me3 K4me1
ENSMUSG00000020891.11	Alox8	chr11	69195384	69199384	K4me3
ENSMUSG00000020901.13	Pik3r5	chr11	68430124	68434124	Repressed
ENSMUSG00000020940.13	Efcab15	chr11	103206548	103210548	Unmarked
ENSMUSG00000020990.5	Cdkl1	chr12	69788707	69792707	K4me3 K4me1 K27ac
ENSMUSG00000021069.17	Pygl	chr12	70225345	70229345	K4me3
ENSMUSG00000021090.16	Lrrc9	chr12	72440241	72444241	Repressed
ENSMUSG00000021203.15	Otub2	chr12	103390653	103394653	K4me1
ENSMUSG00000021219.16	Rgs6	chr12	82615634	82619634	Bivalent
ENSMUSG00000021263.11	Degs2	chr12	108700297	108704297	K4me1 K27ac
ENSMUSG00000021340.13	Gpld1	chr13	24953853	24957853	Unmarked
ENSMUSG00000021464.14	Ror2	chr13	53283549	53287549	K4me3 K27ac
ENSMUSG00000021474.9	Sfxn1	chr13	54083945	54087945	K4me1
ENSMUSG00000021559.14	Dapk1	chr13	60599946	60603946	K4me3 K27ac
ENSMUSG00000021679.4	S100z	chr13	95476721	95480721	Bivalent
ENSMUSG00000021703.9	Serinc5	chr13	92703781	92707781	Unmarked
ENSMUSG00000021733.11	Slc4a7	chr14	14701078	14705078	K4me3 K4me1 K27ac
ENSMUSG00000021876.15	Rnase4	chr14	51089076	51093076	K4me3 K4me1 K27ac
ENSMUSG00000021913.8	Ogdhl	chr14	32320018	32324018	K4me3 K27ac
ENSMUSG00000021947.11	Cryl1	chr14	57396496	57400496	K4me3 K27ac
ENSMUSG00000021991.9	Cacna2d3	chr14	29095903	29099903	Repressed
ENSMUSG00000021999.9	Cpb2	chr14	75270348	75274348	Unmarked
ENSMUSG00000022033.9	Pbk	chr14	65803836	65807836	Unmarked
ENSMUSG00000022043.19	Trim35	chr14	66295065	66299065	K4me3 K27ac
ENSMUSG00000022129.4	Dct	chr14	118050244	118054244	Bivalent
ENSMUSG00000022176.11	Rem2	chr14	54475470	54479470	K4me3
ENSMUSG00000022315.3	Slc30a8	chr15	52293552	52297552	K4me3 K27ac
ENSMUSG00000022415.12	Syngr1	chr15	80089333	80093333	K4me3
ENSMUSG00000022419.16	Deptor	chr15	55131452	55135452	K4me1 K27ac
ENSMUSG00000022435.6	Upk3a	chr15	85015140	85019140	K4me1
ENSMUSG00000022453.8	Naga	chr15	82336807	82340807	K4me3 K27ac
ENSMUSG00000022456.18	Sept3	chr15	82273399	82277399	K4me3
ENSMUSG00000022464.14	Slc38a4	chr15	97029211	97033211	Unmarked
ENSMUSG00000022525.13	Plaat1	chr16	29208107	29212107	Repressed
ENSMUSG00000022577.17	Ly6h	chr15	75565216	75569216	Repressed
ENSMUSG00000022629.17	Kif21a	chr15	90949306	90953306	Unmarked
ENSMUSG00000022797.16	Tfrc	chr16	32618388	32622388	K4me1
ENSMUSG00000022809.4	Nr1i2	chr16	38292824	38296824	K4me1
ENSMUSG00000022853.7	Ehhadh	chr16	21785807	21789807	K4me3 K4me1
ENSMUSG00000022861.17	Dgkg	chr16	22655028	22659028	K4me3
ENSMUSG00000022900.14	Ildr1	chr16	36691977	36695977	K4me3 K4me1 K27ac
ENSMUSG00000022941.8	Ripply3	chr16	94326419	94330419	K4me3 K4me1 K27ac
ENSMUSG00000023036.14	Pcdhgc4	chr18	37813400	37817400	K4me3 K4me1 K27ac
ENSMUSG00000023232.17	Serinc2	chr4	130273218	130277218	K4me3
ENSMUSG00000023393.15	Slc17a9	chr2	180723262	180727262	Bivalent
ENSMUSG00000023873.13	1700010I14Rik	chr17	8986356	8990356	K4me3
ENSMUSG00000023906.3	Cldn6	chr17	23677248	23681248	K4me3
ENSMUSG00000023911.12	Flywch2	chr17	23784081	23788081	K4me3
ENSMUSG00000024013.15	Fgd2	chr17	29371350	29375350	Unmarked
ENSMUSG00000024027.8	Glp1r	chr17	30899816	30903816	K4me3 K27ac
ENSMUSG00000024030.7	Abcg1	chr17	31108964	31112964	Unmarked
ENSMUSG00000024039.15	Cbs	chr17	31625491	31629491	Unmarked
ENSMUSG00000024112.16	Cacna1h	chr17	25378651	25382651	Unmarked
ENSMUSG00000024130.16	Abca3	chr17	24350096	24354096	K4me3 K4me1 K27ac
ENSMUSG00000024197.10	Plin3	chr17	56288511	56292511	K4me3
ENSMUSG00000024222.17	Fkbp5	chr17	28426629	28430629	K4me1
ENSMUSG00000024376.7	Epb41l4a	chr18	33889974	33893974	Unmarked
ENSMUSG00000024386.9	Proc	chr18	32136182	32140182	K4me3 K4me1
ENSMUSG00000024411.11	Aqp4	chr18	15398002	15402002	K4me1
ENSMUSG00000024553.8	Galr1	chr18	82404777	82408777	K4me3 K27ac
ENSMUSG00000024766.15	Lipo3	chr19	33559382	33563382	Unmarked
ENSMUSG00000024846.6	Cst6	chr19	5347357	5351357	Unmarked
ENSMUSG00000024899.7	Papss2	chr19	32618004	32622004	K4me1 K27ac
ENSMUSG00000024924.14	Vldlr	chr19	27215457	27219457	K4me3 K27ac
ENSMUSG00000024940.11	Ltbp3	chr19	5748650	5752650	Unmarked
ENSMUSG00000024942.17	Capn1	chr19	6013203	6017203	K4me3 K27ac
ENSMUSG00000024990.13	Rbp4	chr19	38122828	38126828	K4me3 K27ac
ENSMUSG00000025092.7	Hspa12a	chr19	58941654	58945654	K4me3 K27ac
ENSMUSG00000025127.15	Gcgr	chr11	120528698	120532698	K4me1 K27ac
ENSMUSG00000025188.15	Hps1	chr19	42776647	42780647	Unmarked
ENSMUSG00000025194.5	Abcc2	chr19	43808521	43812521	K4me1
ENSMUSG00000025221.16	Kcnip2	chr19	45792299	45796299	Unmarked
ENSMUSG00000025318.13	Jph3	chr8	121727622	121731622	K4me3
ENSMUSG00000025321.14	Itgb8	chr12	119236801	119240801	K4me3 K27ac
ENSMUSG00000025329.3	Padi1	chr4	140843778	140847778	Repressed
ENSMUSG00000025375.15	Aatk	chr11	120018168	120022168	Unmarked
ENSMUSG00000025429.9	Pstpip2	chr18	77792544	77796544	K4me3 K4me1
ENSMUSG00000025480.5	Syce1	chr7	140785837	140789837	Unmarked
ENSMUSG00000025504.14	Eps8l2	chr7	141355995	141359995	Unmarked
ENSMUSG00000025576.17	Rbfox3	chr11	118907550	118911550	Repressed
ENSMUSG00000025582.4	Nptx1	chr11	119545753	119549753	K4me3 K27ac
ENSMUSG00000025586.17	Cpeb1	chr7	81370441	81374441	K4me3 K4me1 K27ac
ENSMUSG00000025815.13	Dhtkd1	chr2	5909836	5913836	Unmarked
ENSMUSG00000025855.13	Prkar1b	chr5	139128576	139132576	K4me3 K27ac
ENSMUSG00000025867.8	Cplx2	chr13	54369348	54373348	K4me3 K27ac
ENSMUSG00000025935.10	Tram1	chr1	13587875	13591875	K4me3 K27ac
ENSMUSG00000026031.15	Cflar	chr1	58709509	58713509	K4me3 K27ac
ENSMUSG00000026049.11	Tex30	chr1	44100414	44104414	K4me3 K27ac
ENSMUSG00000026090.16	2010300C02Rik	chr1	37623242	37627242	Unmarked
ENSMUSG00000026131.20	Dst	chr1	34087291	34091291	Unmarked
ENSMUSG00000026175.12	Vil1	chr1	74419415	74423415	Unmarked
ENSMUSG00000026196.7	Bard1	chr1	71101146	71105146	K4me3
ENSMUSG00000026303.6	Mlph	chr1	90913084	90917084	K4me3 K4me1 K27ac
ENSMUSG00000026304.13	Rab17	chr1	90967644	90971644	Unmarked
ENSMUSG00000026312.17	Cdh7	chr1	109981005	109985005	K4me3 K4me1
ENSMUSG00000026432.7	Avpr1b	chr1	131597238	131601238	Repressed
ENSMUSG00000026442.14	Nfasc	chr1	132739778	132743778	K4me3 K4me1 K27ac
ENSMUSG00000026443.3	Lrrn2	chr1	132878354	132882354	K4me3
ENSMUSG00000026579.8	F5	chr1	164149837	164153837	Unmarked
ENSMUSG00000026617.16	Bpnt1	chr1	185330179	185334179	K4me3 K4me1 K27ac
ENSMUSG00000026692.12	Fmo4	chr1	162811926	162815926	K4me1
ENSMUSG00000026811.18	St6galnac6	chr2	32606084	32610084	K4me3
ENSMUSG00000026817.14	Ak1	chr2	32627520	32631520	K4me1 K27ac
ENSMUSG00000026834.13	Acvr1c	chr2	58355895	58359895	K4me3
ENSMUSG00000026922.13	Agpat2	chr2	26601716	26605716	K4me3
ENSMUSG00000026959.13	Grin1	chr2	25317120	25321120	K4me3 K4me1
ENSMUSG00000026986.14	Hnmt	chr2	24047079	24051079	K4me3 K4me1
ENSMUSG00000027004.3	Frzb	chr2	80436630	80440630	K4me1 K27ac
ENSMUSG00000027166.14	Dnajc24	chr2	106001202	106005202	K4me3 K27ac
ENSMUSG00000027168.21	Pax6	chr2	105683321	105687321	K4me3 K4me1 K27ac
ENSMUSG00000027215.13	Cd82	chr2	93450679	93454679	K4me1
ENSMUSG00000027219.13	Slc28a2	chr2	122454398	122458398	Unmarked
ENSMUSG00000027227.7	Sord	chr2	122232748	122236748	K4me3
ENSMUSG00000027230.9	Creb3l1	chr2	92022502	92026502	K4me3 K27ac
ENSMUSG00000027259.15	Adal	chr2	121138520	121142520	K4me3 K4me1 K27ac
ENSMUSG00000027315.13	Spint1	chr2	119235361	119239361	K4me3 K27ac
ENSMUSG00000027376.15	Prom2	chr2	127533197	127537197	Repressed
ENSMUSG00000027434.11	Nkx2-2	chr2	147184404	147188404	K4me3 K27ac
ENSMUSG00000027522.15	Stx16	chr2	174074307	174078307	K4me3 K4me1 K27ac
ENSMUSG00000027524.9	Edn3	chr2	174767921	174771921	Unmarked
ENSMUSG00000027536.6	Chmp4c	chr3	10364957	10368957	K4me3 K27ac
ENSMUSG00000027547.17	Sall4	chr2	168765029	168769029	K4me3
ENSMUSG00000027630.13	Tbl1xr1	chr3	22074651	22078651	K4me3 K4me1
ENSMUSG00000027690.13	Slc2a2	chr3	28719516	28723516	K4me1 K27ac
ENSMUSG00000027748.11	Trpc4	chr3	54154372	54158372	Bivalent
ENSMUSG00000027801.7	Tm4sf4	chr3	57423313	57427313	K4me3 K4me1 K27ac
ENSMUSG00000027855.13	Sycp1	chr3	102934100	102938100	Unmarked
ENSMUSG00000027893.14	Ahcyl1	chr3	107675767	107679767	K4me1
ENSMUSG00000027947.11	Il6ra	chr3	89911162	89915162	K4me3 K27ac
ENSMUSG00000027971.16	Ndst4	chr3	125678986	125682986	K4me1
ENSMUSG00000028017.7	Egf	chr3	129723077	129727077	K4me3 K27ac
ENSMUSG00000028059.16	Arhgef2	chr3	88621353	88625353	K4me3 K4me1 K27ac
ENSMUSG00000028064.17	Sema4a	chr3	88453314	88457314	K4me1
ENSMUSG00000028088.14	Fmo5	chr3	97626882	97630882	K4me1
ENSMUSG00000028152.10	Tspan5	chr3	138776205	138780205	K4me3 K4me1 K27ac
ENSMUSG00000028264.16	Spaca1	chr4	34048191	34052191	Unmarked
ENSMUSG00000028469.15	Npr2	chr4	43646004	43650004	Unmarked
ENSMUSG00000028536.12	2610528J11Rik	chr4	118524998	118528998	K4me3
ENSMUSG00000028541.14	B4galt2	chr4	117881112	117885112	K4me3
ENSMUSG00000028546.17	Elavl4	chr4	110290722	110294722	Unmarked
ENSMUSG00000028607.16	Cpt2	chr4	107910766	107914766	Unmarked
ENSMUSG00000028626.5	Col9a2	chr4	121037747	121041747	Unmarked
ENSMUSG00000028661.8	Epha8	chr4	136954816	136958816	Unmarked
ENSMUSG00000028749.7	Pla2g2f	chr4	138755626	138759626	K4me3 K27ac
ENSMUSG00000028755.3	Cda	chr4	138341649	138345649	K4me1
ENSMUSG00000028804.20	Csmd2	chr4	128545935	128549935	K4me1
ENSMUSG00000028825.7	Rhd	chr4	134877809	134881809	Unmarked
ENSMUSG00000028841.14	Cnksr1	chr4	134236399	134240399	K4me3 K27ac
ENSMUSG00000028845.15	Tekt2	chr4	126323199	126327199	Unmarked
ENSMUSG00000028860.13	Sytl1	chr4	133261087	133265087	Bivalent
ENSMUSG00000028865.14	Cd164l2	chr4	133210905	133214905	K4me3
ENSMUSG00000028957.12	Per3	chr4	151042665	151046665	K4me3 K27ac
ENSMUSG00000028976.10	Slc2a5	chr4	150137552	150141552	K4me3 K4me1 K27ac
ENSMUSG00000028989.3	Angptl7	chr4	148498460	148502460	K4me1 K27ac
ENSMUSG00000029007.8	Agtrap	chr4	148082776	148086776	K4me1
ENSMUSG00000029093.14	Sorcs2	chr5	36396124	36400124	Repressed
ENSMUSG00000029102.9	Hgfac	chr5	35039576	35043576	K4me1 K27ac
ENSMUSG00000029153.11	Ociad2	chr5	73336992	73340992	K4me3 K4me1 K27ac
ENSMUSG00000029163.9	Emilin1	chr5	30917920	30921920	K4me3
ENSMUSG00000029173.12	Sepsecs	chr5	52667708	52671708	K4me3 K4me1 K27ac
ENSMUSG00000029273.10	Sult1d1	chr5	87558191	87562191	K4me1
ENSMUSG00000029419.8	Ajm1	chr2	25578263	25582263	Bivalent
ENSMUSG00000029420.14	Rimbp2	chr5	128843671	128847671	K4me1 K27ac
ENSMUSG00000029470.15	P2rx4	chr5	122722654	122726654	Unmarked
ENSMUSG00000029475.17	Kdm2b	chr5	122915724	122919724	Unmarked
ENSMUSG00000029576.17	Radil	chr5	142549077	142553077	K4me3
ENSMUSG00000029602.11	Rasal1	chr5	120651366	120655366	Unmarked
ENSMUSG00000029603.15	Dtx1	chr5	120693403	120697403	Unmarked
ENSMUSG00000029635.15	Cdk8	chr5	146229229	146233229	K4me3 K27ac
ENSMUSG00000029651.16	Mtus2	chr5	147955341	147959341	Bivalent
ENSMUSG00000029656.13	C8b	chr4	104764316	104768316	K4me1 K27ac
ENSMUSG00000029759.9	Pon3	chr6	5254233	5258233	K4me3 K4me1
ENSMUSG00000029777.10	Gars	chr6	55048094	55052094	K4me1 K27ac
ENSMUSG00000029864.7	Gstk1	chr6	42243988	42247988	Bivalent
ENSMUSG00000029878.6	Dbpht2	chr12	74294667	74298667	Unmarked
ENSMUSG00000030067.17	Foxp1	chr6	99161018	99165018	Unmarked
ENSMUSG00000030170.14	Wnt5b	chr6	119465211	119469211	Unmarked
ENSMUSG00000030281.16	Il17rc	chr6	113469426	113473426	Unmarked
ENSMUSG00000030287.15	Itpr2	chr6	146500223	146504223	K4me3
ENSMUSG00000030319.8	Cand2	chr6	115772537	115776537	K4me1 K27ac
ENSMUSG00000030321.15	Efcab12	chr6	115836412	115840412	K4me1
ENSMUSG00000030376.8	Slc8a2	chr7	16128347	16132347	K4me3
ENSMUSG00000030443.16	Zfp583	chr7	6329278	6333278	K4me3
ENSMUSG00000030544.5	Mesp1	chr7	79791788	79795788	Unmarked
ENSMUSG00000030598.15	Fbxo17	chr7	28714803	28718803	K4me3 K27ac
ENSMUSG00000030701.17	Plekhb1	chr7	100656456	100660456	Unmarked
ENSMUSG00000030731.13	Syt3	chr7	44382101	44386101	K4me3
ENSMUSG00000030788.16	Rnf141	chr7	110819283	110823283	K4me1 K27ac
ENSMUSG00000030793.4	Pycard	chr7	127991527	127995527	K4me3 K4me1
ENSMUSG00000030800.10	Prss8	chr7	127928104	127932104	K4me3 K4me1 K27ac
ENSMUSG00000030838.19	Ush1c	chr7	46236464	46240464	K4me3 K4me1 K27ac
ENSMUSG00000030873.9	Scnn1b	chr7	121897227	121901227	Unmarked
ENSMUSG00000030909.6	Anks4b	chr7	120171857	120175857	K4me3 K4me1 K27ac
ENSMUSG00000031442.21	Mcf2l	chr8	13011061	13015061	Unmarked
ENSMUSG00000031559.15	4930555F03Rik	chr8	49483480	49487480	Unmarked
ENSMUSG00000031596.15	Slc7a2	chr8	40872947	40876947	K4me1 K27ac
ENSMUSG00000031791.8	Tmem38a	chr8	72570054	72574054	K4me3 K4me1 K27ac
ENSMUSG00000031803.8	B3gnt3	chr8	71699789	71703789	K4me3 K27ac
ENSMUSG00000031838.8	Ifi30	chr8	70764663	70768663	K4me3
ENSMUSG00000031845.15	Bco1	chr8	117093997	117097997	K4me1
ENSMUSG00000031853.5	Map3k21	chr8	125908449	125912449	K4me3 K4me1
ENSMUSG00000031974.8	Abcb10	chr8	123981122	123985122	K4me3 K4me1 K27ac
ENSMUSG00000031995.9	St14	chr9	31101538	31105538	Unmarked
ENSMUSG00000032066.9	Bco2	chr9	50553181	50557181	K4me3 K4me1 K27ac
ENSMUSG00000032091.15	Tmprss4	chr9	45178653	45182653	Unmarked
ENSMUSG00000032101.6	Ddx25	chr9	35556528	35560528	K4me3 K4me1
ENSMUSG00000032109.15	Nlrx1	chr9	44266128	44270128	K4me3
ENSMUSG00000032193.9	Ldlr	chr9	21743322	21747322	Unmarked
ENSMUSG00000032253.13	Phip	chr9	82926151	82930151	K4me1
ENSMUSG00000032280.16	Tle3	chr9	61371384	61375384	K4me3 K4me1 K27ac
ENSMUSG00000032313.11	Tmem266	chr9	55324948	55328948	K4me3 K4me1
ENSMUSG00000032349.13	Elovl5	chr9	77939290	77943290	K4me1 K27ac
ENSMUSG00000032356.12	Rasgrf1	chr9	89907908	89911908	K4me3 K27ac
ENSMUSG00000032456.13	Nmnat3	chr9	98294603	98298603	K4me3 K27ac
ENSMUSG00000032564.16	Cpne4	chr9	104567482	104571482	K4me3 K4me1
ENSMUSG00000032657.15	Fam189b	chr3	89181202	89185202	K4me3
ENSMUSG00000032679.12	Cd59a	chr2	104093800	104097800	K4me3
ENSMUSG00000032816.15	Igdcc4	chr9	65099485	65103485	K4me3
ENSMUSG00000032852.3	Rspo4	chr2	151840926	151844926	K4me3 K4me1
ENSMUSG00000032875.8	Arhgef17	chr7	100930107	100934107	K4me3 K27ac
ENSMUSG00000032890.17	Rims3	chr4	120859776	120863776	K4me1
ENSMUSG00000033022.8	Cdo1	chr18	46726395	46730395	K4me3 K4me1
ENSMUSG00000033061.15	Resp18	chr1	75276415	75280415	K4me3 K27ac
ENSMUSG00000033209.17	Ttc28	chr5	110877821	110881821	K4me3
ENSMUSG00000033316.14	Galnt9	chr5	110542354	110546354	Repressed
ENSMUSG00000033318.7	Gstt2	chr10	75832383	75836383	K4me3 K27ac
ENSMUSG00000033488.11	Cryzl2	chr1	157470267	157474267	K4me1 K27ac
ENSMUSG00000033579.16	Fa2h	chr8	111391818	111395818	K4me3
ENSMUSG00000033684.14	Qsox1	chr1	155810838	155814838	K4me3 K4me1
ENSMUSG00000033685.13	Ucp2	chr7	100491385	100495385	K4me3 K27ac
ENSMUSG00000033707.9	Lrrc24	chr15	76720159	76724159	K4me3 K27ac
ENSMUSG00000033740.17	St18	chr1	6732869	6736869	K4me3 K4me1 K27ac
ENSMUSG00000033849.3	B3galt2	chr1	143638663	143642663	K4me3 K4me1 K27ac
ENSMUSG00000033880.11	Lgals3bp	chr11	118396151	118400151	Unmarked
ENSMUSG00000034107.10	Ano7	chr1	93371929	93375929	Repressed
ENSMUSG00000034111.6	Tmed8	chr12	87198454	87202454	K4me3 K27ac
ENSMUSG00000034127.15	Tspan8	chr10	115815270	115819270	K4me3 K27ac
ENSMUSG00000034156.16	Tspoap1	chr11	87776792	87780792	Unmarked
ENSMUSG00000034243.17	Golgb1	chr16	36873139	36877139	K4me3 K4me1 K27ac
ENSMUSG00000034245.10	Hdac11	chr6	91154817	91158817	K4me3 K4me1
ENSMUSG00000034427.17	Myo15b	chr11	115888238	115892238	Unmarked
ENSMUSG00000034435.6	Tmem30b	chr12	73544392	73548392	K4me3
ENSMUSG00000034467.7	Dynlrb2	chr8	116503014	116507014	K4me3
ENSMUSG00000034673.14	Pbx2	chr17	34590262	34594262	K4me3
ENSMUSG00000034758.12	Tle6	chr10	81598875	81602875	K4me3
ENSMUSG00000034785.14	Dio1	chr4	107305124	107309124	K4me3 K4me1 K27ac
ENSMUSG00000034871.2	Fam151a	chr4	106731888	106735888	K4me3 K4me1 K27ac
ENSMUSG00000034903.18	Cobll1	chr2	65236626	65240626	K4me3 K4me1 K27ac
ENSMUSG00000034917.8	Tjp3	chr10	81289581	81293581	K4me3 K27ac
ENSMUSG00000034919.2	Ttc22	chr4	106633976	106637976	Unmarked
ENSMUSG00000034936.2	Arl4d	chr11	101663540	101667540	K4me3 K27ac
ENSMUSG00000034949.18	Zfr2	chr10	81231154	81235154	K4me3
ENSMUSG00000035000.8	Dpp4	chr2	62410021	62414021	K4me3 K27ac
ENSMUSG00000035041.8	Creb3l3	chr10	81089906	81093906	Repressed
ENSMUSG00000035121.6	Neil2	chr14	63191525	63195525	K4me3 K4me1 K27ac
ENSMUSG00000035285.6	Nat14	chr7	4920250	4924250	K4me3 K4me1
ENSMUSG00000035469.17	Rcbtb1	chr14	59199227	59203227	K4me3 K4me1 K27ac
ENSMUSG00000035486.14	Plk5	chr10	80354458	80358458	Bivalent
ENSMUSG00000035498.10	Cdcp1	chr9	123176106	123180106	Unmarked
ENSMUSG00000035606.8	Ky	chr9	102519335	102523335	Unmarked
ENSMUSG00000035638.14	Muc20	chr16	32795435	32799435	Unmarked
ENSMUSG00000035694.15	Caps2	chr10	112170539	112174539	Unmarked
ENSMUSG00000035713.15	Usp35	chr7	97313995	97317995	Unmarked
ENSMUSG00000035804.5	Ins1	chr19	52262296	52266296	K4me3 K27ac
ENSMUSG00000035852.11	Misp	chr10	79818988	79822988	Unmarked
ENSMUSG00000035964.8	Tmem59l	chr8	70485358	70489358	Bivalent
ENSMUSG00000036353.13	P2ry12	chr3	59225581	59229581	K4me1
ENSMUSG00000036459.15	Wtip	chr7	34117060	34121060	K4me1
ENSMUSG00000036473.16	Tbc1d24	chr17	24203514	24207514	K4me3 K4me1
ENSMUSG00000036492.12	Rnf39	chr17	36940917	36944917	Repressed
ENSMUSG00000036687.13	Tmem184a	chr5	139817917	139821917	Unmarked
ENSMUSG00000036760.7	Kcnk9	chr15	72544340	72548340	Repressed
ENSMUSG00000036834.16	Plch1	chr3	63897442	63901442	K4me3 K27ac
ENSMUSG00000036856.4	Wnt4	chr4	137275488	137279488	K4me3 K27ac
ENSMUSG00000036872.16	Abcc12	chr8	86564590	86568590	Unmarked
ENSMUSG00000036887.5	C1qa	chr4	136896803	136900803	K4me1 K27ac
ENSMUSG00000036908.17	Unc93b1	chr19	3934078	3938078	K4me3
ENSMUSG00000036923.12	Stox1	chr10	62723801	62727801	K4me3 K4me1 K27ac
ENSMUSG00000036944.6	Tmem71	chr15	66559103	66563103	K4me3 K4me1 K27ac
ENSMUSG00000037126.16	Psd	chr19	46325156	46329156	K4me3 K27ac
ENSMUSG00000037185.9	Krt80	chr15	101365713	101369713	K4me1
ENSMUSG00000037239.8	Spred3	chr7	29167841	29171841	Bivalent
ENSMUSG00000037306.13	Man1c1	chr4	134701767	134705767	K4me3 K4me1
ENSMUSG00000037463.14	Fbxo27	chr7	28694650	28698650	Unmarked
ENSMUSG00000037579.7	Kcnh3	chr15	99225818	99229818	Unmarked
ENSMUSG00000037681.13	Esyt3	chr9	99356557	99360557	Bivalent
ENSMUSG00000037738.11	Nek5	chr8	22123038	22127038	K4me3
ENSMUSG00000037762.6	Slc16a9	chr10	70243099	70247099	K4me3 K27ac
ENSMUSG00000037902.18	Sirpa	chr2	129591561	129595561	K4me3 K4me1 K27ac
ENSMUSG00000038009.7	Dnajc22	chr15	99091169	99095169	Repressed
ENSMUSG00000038024.17	Dennd4c	chr4	86775842	86779842	K4me1
ENSMUSG00000038060.15	Dlec1	chr9	119100477	119104477	K4me3
ENSMUSG00000038167.6	Plekhg6	chr6	125378793	125382793	Repressed
ENSMUSG00000038172.14	Ttc39b	chr4	83322239	83326239	K4me3 K4me1 K27ac
ENSMUSG00000038178.16	Slc43a2	chr11	75529693	75533693	K4me3 K27ac
ENSMUSG00000038248.8	Sobp	chr10	43172521	43176521	K4me3 K27ac
ENSMUSG00000038260.10	Trpm4	chr7	45331780	45335780	K4me3
ENSMUSG00000038267.15	Slc22a23	chr13	34342451	34346451	K4me3 K4me1 K27ac
ENSMUSG00000038296.14	Galnt18	chr7	111777977	111781977	K4me3 K27ac
ENSMUSG00000038486.9	Sv2a	chr3	96190545	96194545	Unmarked
ENSMUSG00000038539.15	Atf5	chr7	44814574	44818574	K4me3 K4me1 K27ac
ENSMUSG00000038560.7	Sp6	chr11	97011393	97015393	Repressed
ENSMUSG00000038630.8	Zkscan16	chr4	58941627	58945627	K4me3 K27ac
ENSMUSG00000038708.10	Golga4	chr9	118563275	118567275	Unmarked
ENSMUSG00000038738.15	Shank1	chr7	44308252	44312252	K4me3
ENSMUSG00000038764.14	Ptpn3	chr4	57298375	57302375	K4me3
ENSMUSG00000038765.13	Lmx1b	chr2	33638480	33642480	K4me3
ENSMUSG00000038793.8	Lefty1	chr1	180934870	180938870	K4me3 K4me1
ENSMUSG00000038884.14	Shfl	chr9	20866679	20870679	K4me3 K27ac
ENSMUSG00000038984.4	Tspyl5	chr15	33685884	33689884	K4me3
ENSMUSG00000039058.11	Ak5	chr3	152476515	152480515	K4me3 K27ac
ENSMUSG00000039059.11	Hrh3	chr2	180102151	180106151	Repressed
ENSMUSG00000039062.15	Anpep	chr7	79823499	79827499	Unmarked
ENSMUSG00000039126.10	Prune2	chr19	17136738	17140738	K4me3 K4me1 K27ac
ENSMUSG00000039230.14	Tbcd	chr11	121542200	121546200	K4me1 K27ac
ENSMUSG00000039236.18	Isg20	chr7	78911980	78915980	K4me3 K4me1 K27ac
ENSMUSG00000039263.16	Npepl1	chr2	174109153	174113153	K4me3 K4me1 K27ac
ENSMUSG00000039313.14	Minar1	chr9	89601391	89605391	Unmarked
ENSMUSG00000039395.8	Mreg	chr1	72210307	72214307	K4me3 K27ac
ENSMUSG00000039396.11	Neil3	chr8	53609483	53613483	Unmarked
ENSMUSG00000039431.16	Mtmr7	chr8	40588514	40592514	K4me1
ENSMUSG00000039529.9	Atp8b1	chr18	64553200	64557200	Unmarked
ENSMUSG00000039607.16	Rbms3	chr9	117249801	117253801	K4me3 K27ac
ENSMUSG00000039661.14	Dusp26	chr8	31087470	31091470	K4me3 K27ac
ENSMUSG00000039671.18	Zmynd8	chr2	165882772	165886772	K4me3 K4me1 K27ac
ENSMUSG00000039745.8	Htatip2	chr7	49757114	49761114	K4me1
ENSMUSG00000039809.10	Gabbr2	chr4	46722391	46726391	Unmarked
ENSMUSG00000040170.13	Fmo2	chr1	162896720	162900720	K4me1
ENSMUSG00000040181.14	Fmo1	chr1	162828473	162832473	Unmarked
ENSMUSG00000040189.18	Ccdc114	chr7	45922242	45926242	K4me3 K27ac
ENSMUSG00000040234.16	Tm7sf3	chr6	146640814	146644814	K4me3 K27ac
ENSMUSG00000040434.16	Large2	chr2	92368073	92372073	K4me3 K4me1
ENSMUSG00000040525.13	Cblc	chr7	19794809	19798809	K4me3 K27ac
ENSMUSG00000040699.13	Limd2	chr11	106157927	106161927	K4me3 K4me1 K27ac
ENSMUSG00000040794.5	C1qtnf4	chr2	90883859	90887859	Repressed
ENSMUSG00000040811.15	Eml2	chr7	19179180	19183180	K4me3
ENSMUSG00000040856.17	Dlk1	chr12	109451454	109455454	Unmarked
ENSMUSG00000040938.16	Slc16a11	chr11	70212114	70216114	K4me3
ENSMUSG00000040969.14	Arhgef38	chr3	133135302	133139302	Unmarked
ENSMUSG00000040972.8	Igsf21	chr4	140244784	140248784	Repressed
ENSMUSG00000040998.18	Npnt	chr3	132947814	132951814	K4me3 K4me1
ENSMUSG00000041117.8	Ccdc8	chr7	16990707	16994707	K4me3
ENSMUSG00000041237.12	Pklr	chr3	89134173	89138173	K4me1
ENSMUSG00000041261.9	Car8	chr4	8237041	8241041	K4me3 K4me1
ENSMUSG00000041351.16	Rap1gap	chr4	137678752	137682752	K4me1
ENSMUSG00000041605.16	Inava	chr1	136232264	136236264	K4me3
ENSMUSG00000041608.8	Entpd3	chr9	120556033	120560033	Unmarked
ENSMUSG00000041642.18	Kif21b	chr1	136129429	136133429	Unmarked
ENSMUSG00000041762.16	Gpr155	chr2	73384572	73388572	K4me3 K27ac
ENSMUSG00000041831.16	Sytl3	chr17	6700951	6704951	Unmarked
ENSMUSG00000041907.9	Gpr45	chr1	42951138	42955138	K4me3 K4me1 K27ac
ENSMUSG00000041945.12	Mfsd9	chr1	40788657	40792657	K4me3 K4me1
ENSMUSG00000042129.8	Rassf4	chr6	116671952	116675952	K4me3 K27ac
ENSMUSG00000042258.13	Isl1	chr13	116307685	116311685	K4me3 K27ac
ENSMUSG00000042340.6	Ctf1	chr7	127710943	127714943	K4me3
ENSMUSG00000042377.8	Fam83g	chr11	61682418	61686418	K4me3 K4me1 K27ac
ENSMUSG00000042429.8	Adora1	chr1	134233397	134237397	K4me3
ENSMUSG00000042460.5	C1galt1	chr6	7842841	7846841	K4me3 K27ac
ENSMUSG00000042514.11	Klhl14	chr18	21652718	21656718	K4me3
ENSMUSG00000042529.14	Kcnj12	chr11	61063803	61067803	K4me1
ENSMUSG00000042589.18	Cux2	chr5	121864063	121868063	Unmarked
ENSMUSG00000042632.17	Pla2g6	chr15	79322488	79326488	K4me1 K27ac
ENSMUSG00000042655.5	Shisal2b	chr13	104861312	104865312	K4me3 K4me1 K27ac
ENSMUSG00000043088.16	Il17re	chr6	113456833	113460833	K4me3
ENSMUSG00000043091.9	Tuba1c	chr15	99027890	99031890	K4me3 K27ac
ENSMUSG00000043168.12	4930426D05Rik	chr18	21649447	21653447	Repressed
ENSMUSG00000043300.2	B3galnt1	chr3	69596960	69600960	K4me3 K27ac
ENSMUSG00000043621.13	Ubxn10	chr4	138722856	138726856	K4me3 K4me1 K27ac
ENSMUSG00000043629.12	1700019D03Rik	chr1	52990656	52994656	Unmarked
ENSMUSG00000043664.7	Tmem221	chr8	71556871	71560871	K4me3
ENSMUSG00000043719.14	Col6a6	chr9	105807648	105811648	K4me3 K4me1 K27ac
ENSMUSG00000043760.16	Pkhd1	chr1	20616040	20620040	K4me3 K4me1
ENSMUSG00000043964.14	Orai3	chr7	127767814	127771814	K4me3 K4me1 K27ac
ENSMUSG00000044017.16	Adgrd1	chr5	129094756	129098756	Unmarked
ENSMUSG00000044254.6	Pcsk9	chr4	106462329	106466329	K4me3 K27ac
ENSMUSG00000044345.9	Marveld1	chr19	42145399	42149399	K4me3 K27ac
ENSMUSG00000044365.15	Cxxc4	chr3	134238589	134242589	K4me3 K4me1 K27ac
ENSMUSG00000044433.16	Camsap3	chr8	3586050	3590050	K4me3
ENSMUSG00000044453.5	Ffar1	chr7	30859564	30863564	K4me3 K4me1 K27ac
ENSMUSG00000044461.6	Shisa2	chr14	59625188	59629188	K4me3 K4me1
ENSMUSG00000044499.11	Hs3st5	chr10	36504888	36508888	Bivalent
ENSMUSG00000044628.5	Rnf208	chr2	25240928	25244928	Bivalent
ENSMUSG00000044629.5	Cnrip1	chr11	17049817	17053817	Bivalent
ENSMUSG00000044726.8	Erich5	chr15	34451304	34455304	K4me3 K4me1
ENSMUSG00000044788.10	Fads6	chr11	115295663	115299663	K4me3 K27ac
ENSMUSG00000044912.11	Syt16	chr12	73995798	73999798	Bivalent
ENSMUSG00000044933.3	Sstr3	chr15	78542685	78546685	K4me3 K27ac
ENSMUSG00000044937.15	Ttc41	chr10	86751431	86755431	Unmarked
ENSMUSG00000044988.7	Ucn3	chr13	3943349	3947349	K4me3 K4me1 K27ac
ENSMUSG00000045009.9	Prrt3	chr6	113499818	113503818	K4me3
ENSMUSG00000045034.12	Ankrd34b	chr13	92424340	92428340	Bivalent
ENSMUSG00000045053.2	Kcng3	chr17	83629895	83633895	K4me3 K4me1
ENSMUSG00000045165.6	AI467606	chr7	127089423	127093423	K4me3
ENSMUSG00000045288.10	Ush1g	chr11	115320041	115324041	K4me3
ENSMUSG00000045348.16	Nyap1	chr5	137737718	137741718	K4me3
ENSMUSG00000045394.9	Epcam	chr17	87633994	87637994	K4me3 K27ac
ENSMUSG00000045589.7	Frrs1l	chr4	56988391	56992391	K4me3
ENSMUSG00000045691.14	Thtpa	chr14	55092783	55096783	K4me3 K4me1 K27ac
ENSMUSG00000045761.16	Togaram2	chr17	71711271	71715271	Unmarked
ENSMUSG00000046178.3	Nxph1	chr6	8946613	8950613	Repressed
ENSMUSG00000046329.14	Slc25a23	chr17	57057863	57061863	K4me3 K4me1 K27ac
ENSMUSG00000046447.3	Camk2n1	chr4	138452313	138456313	K4me3 K27ac
ENSMUSG00000046580.10	Gm7862	chr12	76150627	76154627	Repressed
ENSMUSG00000046593.3	Tmem215	chr4	40471129	40475129	K4me3 K4me1 K27ac
ENSMUSG00000046719.7	Nxph3	chr11	95512570	95516570	K4me3
ENSMUSG00000046731.5	Kctd11	chr11	69878985	69882985	K4me3 K4me1 K27ac
ENSMUSG00000046761.13	Fam83h	chr15	76007498	76011498	K4me3 K27ac
ENSMUSG00000046794.9	Ppp1r3b	chr8	35374659	35378659	K4me3 K4me1
ENSMUSG00000046982.11	Tshz1	chr18	84083075	84087075	K4me3 K4me1 K27ac
ENSMUSG00000047040.9	Prr15l	chr11	96927301	96931301	K4me3 K27ac
ENSMUSG00000047181.12	Samd14	chr11	95007881	95011881	K4me3
ENSMUSG00000047193.16	Dync2h1	chr9	6954689	6958689	Unmarked
ENSMUSG00000047228.9	A2ml1	chr6	128574746	128578746	Unmarked
ENSMUSG00000047501.3	Cldn4	chr5	134944934	134948934	K4me3 K27ac
ENSMUSG00000047507.12	Baiap3	chr17	25254281	25258281	K4me3 K4me1 K27ac
ENSMUSG00000047606.4	Ankrd34c	chr9	89736475	89740475	Bivalent
ENSMUSG00000047638.15	Nr1h4	chr10	89504658	89508658	K4me3 K4me1 K27ac
ENSMUSG00000047642.15	D930020B18Rik	chr10	121639700	121643700	K4me3
ENSMUSG00000047787.8	Flrt1	chr19	7103729	7107729	K4me1
ENSMUSG00000047953.7	Gp5	chr16	30308779	30312779	K4me3
ENSMUSG00000048218.6	Amigo2	chr15	97245287	97249287	K4me3 K27ac
ENSMUSG00000048385.9	Scrt1	chr15	76519902	76523902	K4me3 K27ac
ENSMUSG00000048497.11	Mmgt2	chr11	62646812	62650812	K4me3 K27ac
ENSMUSG00000048502.14	Duxbl1	chr14	25978372	25982372	Unmarked
ENSMUSG00000048652.12	Samd13	chr3	146683592	146687592	K4me3 K4me1 K27ac
ENSMUSG00000049112.9	Oxtr	chr6	112486394	112490394	K4me3 K4me1
ENSMUSG00000049164.7	Zfp518a	chr19	40892704	40896704	Repressed
ENSMUSG00000049241.5	Hcar1	chr5	123878020	123882020	Unmarked
ENSMUSG00000049555.10	Tmie	chr9	110874021	110878021	K4me1
ENSMUSG00000049672.15	Zbtb14	chr17	69381839	69385839	K4me3 K4me1 K27ac
ENSMUSG00000050357.9	Carmil2	chr8	105684273	105688273	Unmarked
ENSMUSG00000050473.5	Slc35d3	chr10	19849459	19853459	K4me3 K27ac
ENSMUSG00000050737.13	Ptges	chr2	30895469	30899469	Unmarked
ENSMUSG00000050854.9	Tmem125	chr4	118540962	118544962	K4me3
ENSMUSG00000050908.12	Tvp23a	chr16	10445327	10449327	Unmarked
ENSMUSG00000050954.15	Zfp169	chr13	48511451	48515451	K4me3 K4me1
ENSMUSG00000051067.8	Lingo3	chr10	80842039	80846039	Unmarked
ENSMUSG00000051527.11	Usp29	chr7	6729199	6733199	K4me3 K27ac
ENSMUSG00000051590.10	Map3k19	chr1	127838321	127842321	K4me1
ENSMUSG00000051817.8	Sox12	chr2	152396046	152400046	K4me3
ENSMUSG00000052117.5	D630039A03Rik	chr4	57914297	57918297	K4me3 K4me1 K27ac
ENSMUSG00000052271.7	Bhlha15	chr5	144188285	144192285	K4me3 K27ac
ENSMUSG00000052331.14	Ankrd44	chr1	54722423	54726423	Unmarked
ENSMUSG00000052374.16	Actn2	chr13	12280547	12284547	Unmarked
ENSMUSG00000052512.17	Nav2	chr7	48906715	48910715	K4me1
ENSMUSG00000052595.8	A1cf	chr19	31866772	31870772	K4me3 K4me1 K27ac
ENSMUSG00000052613.16	Pcdh15	chr10	73819882	73823882	K4me3 K27ac
ENSMUSG00000052889.11	Prkcb	chr7	122287296	122291296	K4me3
ENSMUSG00000052951.5	C130021I20Rik	chr2	33639192	33643192	K4me3
ENSMUSG00000053025.13	Sv2b	chr7	75306379	75310379	K4me3
ENSMUSG00000053141.16	Ptprt	chr2	162133451	162137451	Unmarked
ENSMUSG00000053182.11	Gm609	chr16	45452978	45456978	K4me3 K4me1 K27ac
ENSMUSG00000053399.9	Adamts18	chr8	113843301	113847301	Repressed
ENSMUSG00000053545.6	6430503K07Rik	chr2	147185423	147189423	K4me3 K4me1 K27ac
ENSMUSG00000053552.14	Ebf4	chr2	130293938	130297938	Unmarked
ENSMUSG00000053647.4	Gper1	chr5	139421279	139425279	K4me1
ENSMUSG00000054065.12	Pkp3	chr7	141087410	141091410	Unmarked
ENSMUSG00000054256.11	Msi1	chr5	115432995	115436995	K4me1
ENSMUSG00000054277.8	Arfgap3	chr15	83304971	83308971	Unmarked
ENSMUSG00000054320.16	Lrrc36	chr8	105411570	105415570	K4me3 K4me1
ENSMUSG00000054408.9	Spcs3	chr8	54527998	54531998	K4me3 K4me1 K27ac
ENSMUSG00000054457.5	9430021M05Rik	chr2	162659162	162663162	K4me3 K4me1
ENSMUSG00000054459.8	Vsnl1	chr12	11433640	11437640	K4me3 K4me1
ENSMUSG00000054598.13	9130230L23Rik	chr5	65999791	66003791	K4me1
ENSMUSG00000054662.8	Ano9	chr7	141115806	141119806	K4me3
ENSMUSG00000054728.17	Phactr1	chr13	42678798	42682798	K4me3 K4me1 K27ac
ENSMUSG00000055053.18	Nfic	chr10	81398554	81402554	K4me1
ENSMUSG00000055197.4	Fev	chr1	74883419	74887419	Repressed
ENSMUSG00000055202.11	Zfp811	chr17	32807931	32811931	Bivalent
ENSMUSG00000055745.4	Rtl6	chr15	84555823	84559823	K4me3 K27ac
ENSMUSG00000055897.13	Ppp4r1l-ps	chr2	173657368	173661368	K4me3 K4me1 K27ac
ENSMUSG00000056050.13	Mia3	chr1	183367553	183371553	K4me3 K4me1 K27ac
ENSMUSG00000056306.5	Sertm1	chr3	54913887	54917887	Repressed
ENSMUSG00000056569.11	Mpz	chr1	171148710	171152710	K4me3 K27ac
ENSMUSG00000056812.14	St8sia3	chr18	64262618	64266618	K4me3 K27ac
ENSMUSG00000056895.4	H2bu2	chr11	58946919	58950919	K4me3
ENSMUSG00000057069.7	Ero1lb	chr13	12563873	12567873	K4me3 K27ac
ENSMUSG00000057092.12	Fxyd3	chr7	31074655	31078655	K4me3 K4me1
ENSMUSG00000057132.16	Rpgrip1	chr14	52119108	52123108	K4me3
ENSMUSG00000057182.15	Scn3a	chr2	65565492	65569492	K4me3 K27ac
ENSMUSG00000057246.16	BC051142	chr17	34396819	34400819	K4me3
ENSMUSG00000057530.14	Ece1	chr4	137860236	137864236	K4me3 K27ac
ENSMUSG00000057897.14	Camk2b	chr11	6063545	6067545	K4me3 K27ac
ENSMUSG00000058135.12	Gstm1	chr3	108014600	108018600	K4me3 K4me1 K27ac
ENSMUSG00000058153.15	Sez6l	chr5	112575177	112579177	K4me3 K27ac
ENSMUSG00000058159.14	T2	chr17	8394628	8398628	Unmarked
ENSMUSG00000058297.16	Spock2	chr10	60104218	60108218	K4me3 K27ac
ENSMUSG00000058441.7	Panx2	chr15	89067672	89071672	Unmarked
ENSMUSG00000058488.7	Kl	chr5	150950606	150954606	K4me3
ENSMUSG00000058586.12	Serhl	chr15	83095070	83099070	Unmarked
ENSMUSG00000058638.14	Zfp110	chr7	12832760	12836760	K4me3 K27ac
ENSMUSG00000058881.13	Zfp516	chr18	82908926	82912926	K4me3 K27ac
ENSMUSG00000059555.6	Tor4a	chr2	25194759	25198759	K4me3 K27ac
ENSMUSG00000059824.12	Dbp	chr7	45703283	45707283	K4me3 K27ac
ENSMUSG00000059854.8	Hydin	chr8	110264990	110268990	Unmarked
ENSMUSG00000059921.15	Unc5c	chr3	141463573	141467573	K4me3
ENSMUSG00000060224.4	Pyroxd2	chr19	42750775	42754775	K4me3 K27ac
ENSMUSG00000060314.13	Zfp941	chr7	140820146	140824146	Repressed
ENSMUSG00000060969.9	Irx1	chr13	71958716	71962716	K4me3
ENSMUSG00000061126.5	Cyp4f39	chr17	32450751	32454751	K4me3 K4me1 K27ac
ENSMUSG00000061175.12	Fnip2	chr3	79565682	79569682	K4me3 K4me1 K27ac
ENSMUSG00000061232.16	H2-K1	chr17	33998283	34002283	K4me3
ENSMUSG00000061306.16	Slc38a10	chr11	120149312	120153312	K4me3 K27ac
ENSMUSG00000061414.8	Cracr2a	chr6	127575896	127579896	Unmarked
ENSMUSG00000062031.13	Pgghg	chr7	140939390	140943390	K4me3 K27ac
ENSMUSG00000062044.16	Lmtk3	chr7	45781946	45785946	K4me3 K4me1 K27ac
ENSMUSG00000062157.6	Ifnlr1	chr4	135684286	135688286	Bivalent
ENSMUSG00000062563.15	Cys1	chr12	24679795	24683795	K4me3
ENSMUSG00000062760.10	Shisal1	chr15	84445097	84449097	Unmarked
ENSMUSG00000062785.14	Kcnc3	chr7	44588663	44592663	K4me3 K27ac
ENSMUSG00000062859.15	Tcp11	chr17	28078523	28082523	K4me3
ENSMUSG00000063011.7	Msln	chr17	25752314	25756314	Unmarked
ENSMUSG00000063077.15	Kif1b	chr4	149305623	149309623	K4me3 K4me1 K27ac
ENSMUSG00000063558.4	Aox1	chr1	58027930	58031930	K4me3 K4me1 K27ac
ENSMUSG00000063652.10	Slc22a21	chr11	53951146	53955146	K4me1
ENSMUSG00000063681.14	Crb1	chr1	139375100	139379100	K4me3 K4me1 K27ac
ENSMUSG00000063895.7	Nupl1	chr14	60249431	60253431	K4me3 K27ac
ENSMUSG00000063919.11	Srrm4	chr5	116475068	116479068	Unmarked
ENSMUSG00000064125.14	Prr36	chr8	4215312	4219312	K4me3
ENSMUSG00000066800.11	Rnasel	chr1	153749951	153753951	K4me3 K27ac
ENSMUSG00000067028.11	Cntnap5b	chr1	99770764	99774764	K4me3
ENSMUSG00000067219.9	Nipal1	chr5	72645841	72649841	K4me3 K4me1 K27ac
ENSMUSG00000067242.11	Lgi1	chr19	38262576	38266576	K4me3 K4me1 K27ac
ENSMUSG00000067578.3	Cbln4	chr2	172041466	172045466	Repressed
ENSMUSG00000067629.13	Syngap1	chr17	26939252	26943252	K4me3 K27ac
ENSMUSG00000067786.16	Nnat	chr2	157558123	157562123	K4me1 K27ac
ENSMUSG00000067889.6	Sptbn2	chr19	4709166	4713166	K4me3 K27ac
ENSMUSG00000068263.11	Efcc1	chr6	87730808	87734808	K4me3 K4me1
ENSMUSG00000068551.12	Zfp467	chr6	48443464	48447464	K4me3 K27ac
ENSMUSG00000068615.4	Gjd2	chr2	114011619	114015619	K4me3 K27ac
ENSMUSG00000068686.12	Cd59b	chr2	104067848	104071848	K4me1
ENSMUSG00000068735.14	Trp53i11	chr2	93187190	93191190	K4me3
ENSMUSG00000069008.3	Gm5537	chr3	58102247	58106247	Unmarked
ENSMUSG00000069805.10	Fbp1	chr13	62870758	62874758	Unmarked
ENSMUSG00000069920.10	B3gnt9	chr8	105253151	105257151	K4me3 K27ac
ENSMUSG00000070315.12	4930581F22Rik	chr9	35116194	35120194	K4me3
ENSMUSG00000070348.5	Ccnd1	chr7	144936197	144940197	K4me3 K27ac
ENSMUSG00000070473.4	Cldn3	chr5	134984213	134988213	K4me3 K27ac
ENSMUSG00000070498.3	Tmem132b	chr5	125529773	125533773	K4me3 K27ac
ENSMUSG00000070577.5	Gm572	chr4	148641316	148645316	K4me3
ENSMUSG00000070661.6	Rnf186	chr4	138965111	138969111	K4me3 K27ac
ENSMUSG00000070737.10	Tmem35b	chr4	127121690	127125690	Unmarked
ENSMUSG00000070780.11	Rbm47	chr5	66079990	66083990	K4me3 K4me1
ENSMUSG00000070802.5	Pnmal2	chr7	16942681	16946681	K4me3 K27ac
ENSMUSG00000071005.7	Ccl19	chr4	42754489	42758489	Unmarked
ENSMUSG00000071265.10	1700086L19Rik	chr12	74282288	74286288	K4me3 K27ac
ENSMUSG00000071531.3	Gprin2	chr14	34199633	34203633	K4me3
ENSMUSG00000071547.4	Nt5dc2	chr14	31129052	31133052	K4me3
ENSMUSG00000071648.4	Rom1	chr19	8927356	8931356	K4me3 K27ac
ENSMUSG00000072115.11	Ang	chr14	51093999	51097999	K4me3 K27ac
ENSMUSG00000072675.12	Duxbl2	chr14	26118144	26122144	Unmarked
ENSMUSG00000073000.3	Gm10451	chr12	76447697	76451697	Unmarked
ENSMUSG00000073096.11	Lrrc61	chr6	48552795	48556795	K4me3 K27ac
ENSMUSG00000073197.9	5730507C01Rik	chr12	18512509	18516509	Unmarked
ENSMUSG00000073530.11	Pappa2	chr1	158958381	158962381	K4me1
ENSMUSG00000073684.13	Faap20	chr4	155248695	155252695	K4me3 K27ac
ENSMUSG00000073888.13	Ccl27a	chr4	41771601	41775601	Unmarked
ENSMUSG00000073889.10	Il11ra1	chr4	41765933	41769933	Unmarked
ENSMUSG00000074207.10	Adh1	chr3	138275493	138279493	K4me3 K4me1 K27ac
ENSMUSG00000074272.10	Ceacam1	chr7	25474704	25478704	K4me3 K4me1
ENSMUSG00000074277.4	Phldb3	chr7	24608762	24612762	K4me3 K27ac
ENSMUSG00000074345.4	Tnfaip8l3	chr9	54066388	54070388	K4me3 K27ac
ENSMUSG00000074582.10	Arfgef2	chr2	166803587	166807587	K4me3 K4me1 K27ac
ENSMUSG00000074671.6	Tspyl3	chr2	153223441	153227441	K4me3
ENSMUSG00000074715.3	Ccl28	chr13	119621818	119625818	K4me3 K4me1 K27ac
ENSMUSG00000074892.9	B3galt5	chr16	96271473	96275473	K4me1
ENSMUSG00000074981.13	Dcdc5	chr2	106001335	106005335	K4me3 K27ac
ENSMUSG00000075420.6	Smim6	chr11	115910016	115914016	K4me1 K27ac
ENSMUSG00000075569.10	Rsph10b	chr5	143979151	143983151	Unmarked
ENSMUSG00000075592.10	Nynrin	chr14	55852035	55856035	K4me3 K4me1
ENSMUSG00000078350.11	Smim1	chr4	154023616	154027616	K4me3 K27ac
ENSMUSG00000078588.10	Ccdc24	chr4	117870520	117874520	Unmarked
ENSMUSG00000078671.11	Chd2	chr7	73539830	73543830	K4me3 K27ac
ENSMUSG00000078747.9	Gm20878	chr4	41939571	41943571	Unmarked
ENSMUSG00000078880.10	Gm14308	chr2	176634343	176638343	Unmarked
ENSMUSG00000078945.10	Naip2	chr13	100200092	100204092	K4me3 K4me1 K27ac
ENSMUSG00000079056.12	Kcnip3	chr2	127520094	127524094	K4me3 K4me1
ENSMUSG00000079071.2	Slc28a2b	chr2	122482940	122486940	Unmarked
ENSMUSG00000079262.3	Slco1a6	chr6	142206521	142210521	Unmarked
ENSMUSG00000079434.8	Neu2	chr1	87592549	87596549	Unmarked
ENSMUSG00000079497.4	Gm13420	chr2	29749685	29753685	K4me3 K4me1 K27ac
ENSMUSG00000079620.13	Muc4	chr16	32775536	32779536	Unmarked
ENSMUSG00000080115.3	Eef1akmt3	chr10	127039513	127043513	K4me3 K4me1 K27ac
ENSMUSG00000081219.1	Bambi-ps1	chr2	122465526	122469526	Unmarked
ENSMUSG00000081303.2	Gm16011	chr16	45427506	45431506	K4me1
ENSMUSG00000084839.1	Gm14097	chr2	132696523	132700523	K4me3 K4me1 K27ac
ENSMUSG00000084866.2	A930006K02Rik	chr16	91463024	91467024	K4me3
ENSMUSG00000084902.2	Gm281	chr14	13912478	13916478	K4me3 K4me1 K27ac
ENSMUSG00000084983.7	Gm11789	chr11	120529784	120533784	K4me1 K27ac
ENSMUSG00000085158.1	Gm14264	chr2	170660465	170664465	Unmarked
ENSMUSG00000085322.2	Gm14261	chr2	168764142	168768142	K4me3
ENSMUSG00000085636.1	Gm11769	chr11	120148561	120152561	K4me3 K27ac
ENSMUSG00000085833.2	Gm13003	chr4	137163066	137167066	K4me1
ENSMUSG00000085912.2	Trp53cor1	chr17	29077179	29081179	K4me3 K27ac
ENSMUSG00000085929.1	Gm13421	chr2	27538425	27542425	K4me3 K27ac
ENSMUSG00000086022.1	Rad51ap2	chr12	11454078	11458078	K4me3 K4me1
ENSMUSG00000086171.7	Pcsk2os1	chr2	143543977	143547977	K4me3 K4me1 K27ac
ENSMUSG00000086587.7	Gm11837	chr4	14927907	14931907	K4me3
ENSMUSG00000087077.1	Gm12480	chr4	54649902	54653902	Unmarked
ENSMUSG00000087094.1	Gm13093	chr4	150117263	150121263	K4me3 K27ac
ENSMUSG00000087141.1	Plcxd2	chr16	46008218	46012218	K4me3 K4me1 K27ac
ENSMUSG00000087259.7	2610035D17Rik	chr11	113171077	113175077	K4me3
ENSMUSG00000087355.7	Gm13187	chr2	4299112	4303112	K4me3 K4me1
ENSMUSG00000089663.1	Gm15651	chr16	22546552	22550552	K4me3 K4me1 K27ac
ENSMUSG00000089682.10	Bcl2l2	chr14	54881503	54885503	K4me3 K27ac
ENSMUSG00000090035.3	Galnt4	chr10	99106158	99110158	K4me3 K4me1
ENSMUSG00000090799.2	Klhl33	chr14	50895479	50899479	Unmarked
ENSMUSG00000091472.2	Gm3739	chr14	7313049	7317049	Unmarked
ENSMUSG00000091586.2	Cyp4f17	chr17	32504049	32508049	K4me3 K27ac
ENSMUSG00000091735.2	Gpr62	chr9	106463938	106467938	K4me3
ENSMUSG00000091898.8	Tnnc1	chr14	31206329	31210329	Unmarked
ENSMUSG00000092130.2	D030025P21Rik	chr12	84873768	84877768	K4me3
ENSMUSG00000092192.7	Dnaaf4	chr9	72956784	72960784	K4me3 K4me1
ENSMUSG00000092274.3	Neat1	chr19	5843259	5847259	K4me3 K27ac
ENSMUSG00000092286.1	Dtnbos	chr12	3760146	3764146	K4me1 K27ac
ENSMUSG00000092500.1	Gm20400	chr6	142159492	142163492	K4me1
ENSMUSG00000092570.7	Plut	chr5	147268995	147272995	K4me3 K27ac
ENSMUSG00000094282.1	Cfap73	chr5	120632235	120636235	K4me3 K4me1
ENSMUSG00000094472.1	Gm21897	chr16	15315457	15319457	Unmarked
ENSMUSG00000094504.3	Gm5294	chr5	138818079	138822079	Unmarked
ENSMUSG00000094893.2	Gm4791	chr9	46996740	47000740	K4me3 K4me1 K27ac
ENSMUSG00000095105.2	Edaradd	chr13	12518438	12522438	K4me3 K4me1
ENSMUSG00000096107.2	Gm16505	chr13	3356272	3360272	Unmarked
ENSMUSG00000096146.2	Kcnj11	chr7	46098658	46102658	K4me3 K4me1 K27ac
ENSMUSG00000096215.8	Smim22	chr16	5005336	5009336	K4me1 K27ac
ENSMUSG00000096847.2	Tmem151b	chr17	45547677	45551677	Bivalent
ENSMUSG00000096929.7	A330023F24Rik	chr1	194974374	194978374	K4me3 K4me1 K27ac
ENSMUSG00000096935.5	1700113A16Rik	chr3	88175785	88179785	K4me3 K4me1 K27ac
ENSMUSG00000096956.2	Snhg18	chr15	32242662	32246662	K4me3 K4me1
ENSMUSG00000097101.3	1810034E14Rik	chr13	64246699	64250699	K4me3
ENSMUSG00000097184.2	4632428C04Rik	chr16	30006666	30010666	K4me3 K27ac
ENSMUSG00000097203.2	4732419C18Rik	chr8	123752726	123756726	Bivalent
ENSMUSG00000097328.7	Tnfsf12	chr11	69693849	69697849	K4me3
ENSMUSG00000097467.2	Gm26737	chr9	44116121	44120121	Unmarked
ENSMUSG00000097619.8	4833422M21Rik	chr15	96252616	96256616	K4me3 K4me1
ENSMUSG00000097666.2	A330094K24Rik	chr18	77730739	77734739	K4me3 K27ac
ENSMUSG00000097899.2	Gm16894	chr1	40083851	40087851	K4me3 K4me1
ENSMUSG00000097908.7	4933404O12Rik	chr5	136917351	136921351	K4me3 K27ac
ENSMUSG00000099032.2	Tcf24	chr1	9965932	9969932	K4me3
ENSMUSG00000099413.1	Gm17767	chr1	51510329	51514329	K4me3 K4me1 K27ac
ENSMUSG00000099908.1	Gm28539	chr16	18834583	18838583	K4me3 K27ac
ENSMUSG00000100009.6	Gm7967	chr1	98587517	98591517	K4me3 K27ac
ENSMUSG00000100094.1	1810008I18Rik	chr7	65801110	65805110	K4me3 K4me1 K27ac
ENSMUSG00000100490.1	Gm28455	chr7	39487437	39491437	Unmarked
ENSMUSG00000100572.1	2410021H03Rik	chr17	69275208	69279208	K4me3 K4me1 K27ac
ENSMUSG00000100707.1	Gm28523	chr6	141248009	141252009	K4me3
ENSMUSG00000102059.1	Gm20257	chr1	58650640	58654640	K4me3 K27ac
ENSMUSG00000103182.1	Gm37091	chr1	39081338	39085338	Unmarked
ENSMUSG00000103965.1	Gm30173	chr3	52514963	52518963	Unmarked
ENSMUSG00000104283.1	Gm37459	chr3	32972675	32976675	K4me1 K27ac
ENSMUSG00000104301.3	Wdr49	chr3	75480156	75484156	K4me3 K4me1 K27ac
ENSMUSG00000106139.1	Gm30648	chr3	134198085	134202085	K4me3 K4me1 K27ac
ENSMUSG00000106164.1	9430085M18Rik	chr5	101701585	101705585	K4me1
ENSMUSG00000106714.1	Gm42546	chr5	117297888	117301888	Unmarked
ENSMUSG00000106847.1	Peg13	chr15	72808324	72812324	K4me3 K27ac
ENSMUSG00000107008.3	Gm2762	chr13	53392290	53396290	Unmarked
ENSMUSG00000107191.1	Gm43579	chr5	120625621	120629621	Unmarked
ENSMUSG00000107317.1	Gm19719	chr5	149285868	149289868	K4me3 K4me1
ENSMUSG00000107881.1	Gm44250	chr6	5218486	5222486	Unmarked
ENSMUSG00000109715.1	Gm45606	chr11	75531071	75535071	K4me3 K4me1 K27ac
ENSMUSG00000109814.1	Gm45847	chr7	123029414	123033414	K4me3 K4me1 K27ac
ENSMUSG00000110027.1	C030029H02Rik	chr7	136266331	136270331	Unmarked
ENSMUSG00000110086.1	Gm45623	chr13	56751827	56755827	K4me3
ENSMUSG00000110146.1	Gm45487	chr7	46110081	46114081	K4me1 K27ac
ENSMUSG00000110230.1	Gm45846	chr7	123029373	123033373	K4me3 K4me1 K27ac
ENSMUSG00000110724.1	Gm47824	chr9	77899528	77903528	K4me1
ENSMUSG00000110803.1	Gm20275	chr9	59939077	59943077	K4me3 K4me1 K27ac
ENSMUSG00000111303.1	4930502A04Rik	chr9	68518200	68522200	Unmarked
ENSMUSG00000111977.1	Gm47163	chr10	79635855	79639855	K4me3 K4me1 K27ac
ENSMUSG00000112470.1	5330439M10Rik	chr10	118110516	118114516	K4me3 K4me1 K27ac
ENSMUSG00000112803.1	Gm36543	chr10	25705943	25709943	K4me3 K4me1 K27ac
ENSMUSG00000113571.1	Gm48137	chr12	35138891	35142891	Unmarked
ENSMUSG00000114493.2	Gm47071	chr13	55824249	55828249	Repressed
ENSMUSG00000115767.1	Gm10366	chr14	54462742	54466742	K4me3
ENSMUSG00000115801.1	AC160336.1	chr14	44635201	44639201	Unmarked
ENSMUSG00000115867.1	Gm17753	chr15	79021529	79025529	Unmarked
ENSMUSG00000116581.1	Gm46565	chr16	30933629	30937629	K4me3 K4me1 K27ac
ENSMUSG00000116652.2	B830017H08Rik	chr16	17831567	17835567	K4me3 K4me1 K27ac
ENSMUSG00000117592.1	Gm46603	chr17	29320549	29324549	K4me1
ENSMUSG00000117916.1	9630028I04Rik	chr17	27246066	27250066	Unmarked
ENSMUSG00000118119.1	Gm9937	chr17	30873284	30877284	K4me1 K27ac
ENSMUSG00000118256.1	Gm50303	chr18	82412364	82416364	Unmarked
ENSMUSG00000118356.1	Gm50353	chr18	64698054	64702054	K4me3 K4me1 K27ac
ENSMUSG00000118366.1	9130016M20Rik	chr19	31948083	31952083	Unmarked

## Sheet: Upregulated Islet
geneID	geneSymbol	Chr	Start	End	Chromatin State
ENSMUSG00000000031.16	H19	chr7	142575386	142579386	Repressed
ENSMUSG00000000088.7	Cox5a	chr9	57519278	57523278	K4me3 K27ac
ENSMUSG00000000301.16	Pemt	chr11	60044485	60048485	Unmarked
ENSMUSG00000000489.7	Pdgfb	chr15	80012977	80016977	K4me3
ENSMUSG00000000530.16	Acvrl1	chr15	101126923	101130923	Repressed
ENSMUSG00000000531.5	Grasp	chr15	101222187	101226187	K4me3
ENSMUSG00000000753.15	Serpinf1	chr11	75413195	75417195	Unmarked
ENSMUSG00000000884.17	Gnb1l	chr16	18496901	18500901	K4me3 K27ac
ENSMUSG00000000889.8	Dbh	chr2	27163232	27167232	Unmarked
ENSMUSG00000001020.8	S100a4	chr3	90601770	90605770	K4me1 K27ac
ENSMUSG00000001025.8	S100a6	chr3	90611153	90615153	K4me1 K27ac
ENSMUSG00000001029.15	Icam2	chr11	106386075	106390075	K4me1
ENSMUSG00000001056.3	Nhp2	chr11	51617734	51621734	K4me3 K4me1
ENSMUSG00000001119.7	Col6a1	chr10	76717236	76721236	Unmarked
ENSMUSG00000001270.9	Ckb	chr12	111670283	111674283	K4me3 K27ac
ENSMUSG00000001313.12	Rnd2	chr11	101462998	101466998	K4me3 K4me1 K27ac
ENSMUSG00000001435.15	Col18a1	chr10	77057997	77061997	Unmarked
ENSMUSG00000001864.13	Aif1l	chr2	31948333	31952333	Bivalent
ENSMUSG00000002274.13	Metrn	chr17	25794081	25798081	Unmarked
ENSMUSG00000002308.16	Cd320	chr17	33841090	33845090	K4me3
ENSMUSG00000002379.7	Ndufa11	chr17	56715797	56719797	K4me3 K4me1 K27ac
ENSMUSG00000002489.16	Tiam1	chr16	89972699	89976699	Unmarked
ENSMUSG00000002808.7	Epdr1	chr13	19617788	19621788	Repressed
ENSMUSG00000002885.14	Adgre5	chr8	83726304	83730304	Unmarked
ENSMUSG00000002900.16	Lamb1	chr12	31263296	31267296	Bivalent
ENSMUSG00000003072.15	Atp5d	chr10	80136631	80140631	K4me3 K27ac
ENSMUSG00000004105.8	Angptl2	chr2	33214097	33218097	K4me1 K27ac
ENSMUSG00000004665.10	Cnn2	chr10	79986622	79990622	Unmarked
ENSMUSG00000004698.11	Hdac9	chr12	34526304	34530304	K4me3 K4me1 K27ac
ENSMUSG00000004892.13	Bcan	chr3	87995265	87999265	Repressed
ENSMUSG00000005089.15	Slc1a2	chr2	102704437	102708437	Unmarked
ENSMUSG00000005540.10	Fcer2a	chr8	3692175	3696175	Unmarked
ENSMUSG00000005674.9	Tomm40l	chr1	171220514	171224514	K4me3
ENSMUSG00000005681.12	Apoa2	chr1	171223090	171227090	K4me1 K27ac
ENSMUSG00000006378.15	Gcat	chr15	79031497	79035497	K4me1
ENSMUSG00000006445.3	Epha2	chr4	141314912	141318912	Unmarked
ENSMUSG00000006476.19	Nsmf	chr2	25052402	25056402	K4me3
ENSMUSG00000006576.16	Slc4a3	chr1	75544295	75548295	K4me3 K27ac
ENSMUSG00000007480.4	Mc5r	chr18	68335595	68339595	K4me1
ENSMUSG00000008398.15	Elk3	chr10	93308811	93312811	K4me3
ENSMUSG00000009013.5	Dynll1	chr5	115298663	115302663	K4me3 K27ac
ENSMUSG00000009687.14	Fxyd5	chr7	31039839	31043839	Repressed
ENSMUSG00000010492.10	Uckl1os	chr2	181576517	181580517	K4me1 K27ac
ENSMUSG00000012428.9	Steap4	chr5	7958456	7962456	Repressed
ENSMUSG00000013083.8	2200002J24Rik	chr7	30697782	30701782	K4me1
ENSMUSG00000014226.10	Cacybp	chr1	160210726	160214726	K4me3 K4me1 K27ac
ENSMUSG00000014313.15	Cox6c	chr15	35935645	35939645	K4me3 K27ac
ENSMUSG00000014361.5	Mertk	chr2	128769312	128773312	Repressed
ENSMUSG00000015806.12	Qdpr	chr5	45448176	45452176	K4me3 K4me1 K27ac
ENSMUSG00000016024.9	Lbp	chr2	158304492	158308492	Unmarked
ENSMUSG00000016194.14	Hsd11b1	chr1	193262075	193266075	Unmarked
ENSMUSG00000016262.14	Sertad4	chr1	192853756	192857756	K4me3 K4me1
ENSMUSG00000016494.9	Cd34	chr1	194936874	194940874	Repressed
ENSMUSG00000017165.1	Gast	chr11	100332406	100336406	K4me1 K27ac
ENSMUSG00000017204.4	Gsdma	chr11	98662350	98666350	K4me1
ENSMUSG00000017309.11	Cd300lg	chr11	102039508	102043508	K4me1
ENSMUSG00000018411.17	Mapt	chr11	104229583	104233583	K4me3 K27ac
ENSMUSG00000018770.9	Atp5g3	chr2	73909291	73913291	K4me3 K4me1 K27ac
ENSMUSG00000018774.13	Cd68	chr11	69664062	69668062	K4me1 K27ac
ENSMUSG00000019139.10	Isyna1	chr8	70593966	70597966	K4me3
ENSMUSG00000019278.5	Dpep1	chr8	123191950	123195950	Unmarked
ENSMUSG00000019494.14	Cops6	chr5	138159070	138163070	K4me3 K27ac
ENSMUSG00000019762.4	Iyd	chr10	3538287	3542287	Bivalent
ENSMUSG00000019772.5	Vip	chr10	5637217	5641217	Repressed
ENSMUSG00000019831.14	Wasf1	chr10	40881474	40885474	K4me3 K27ac
ENSMUSG00000019846.11	Lama4	chr10	39051804	39055804	Unmarked
ENSMUSG00000019997.11	Ccn2	chr10	24593779	24597779	Repressed
ENSMUSG00000020037.15	Rfx4	chr10	84836147	84840147	Unmarked
ENSMUSG00000020052.9	Ascl1	chr10	87491660	87495660	Bivalent
ENSMUSG00000020053.18	Igf1	chr10	87859328	87863328	Bivalent
ENSMUSG00000020083.13	Fam241b	chr10	62132706	62136706	Repressed
ENSMUSG00000020143.15	Dock2	chr11	34781892	34785892	Repressed
ENSMUSG00000020155.2	Kcnmb1	chr11	33961012	33965012	K4me3 K4me1 K27ac
ENSMUSG00000020163.12	Uqcr11	chr10	80404830	80408830	K4me3 K27ac
ENSMUSG00000020169.4	Best3	chr10	116984313	116988313	K4me3 K4me1 K27ac
ENSMUSG00000020218.11	Wif1	chr10	121081754	121085754	Unmarked
ENSMUSG00000020241.13	Col6a2	chr10	76621325	76625325	Repressed
ENSMUSG00000020396.8	Nefh	chr11	4946064	4950064	K4me3
ENSMUSG00000020623.11	Map2k6	chr11	110397258	110401258	K4me3 K4me1
ENSMUSG00000020650.15	Bcap29	chr12	31599749	31603749	Unmarked
ENSMUSG00000020684.14	Rasl10b	chr11	83407136	83411136	Bivalent
ENSMUSG00000020695.14	Mrc2	chr11	105290667	105294667	Bivalent
ENSMUSG00000020717.19	Pecam1	chr11	106748628	106752628	K4me1
ENSMUSG00000020810.5	Cygb	chr11	116652313	116656313	Repressed
ENSMUSG00000020843.15	Timm22	chr11	76404951	76408951	K4me3 K27ac
ENSMUSG00000021010.8	Npas3	chr12	53251045	53255045	K4me3 K4me1
ENSMUSG00000021071.16	Trim9	chr12	70345332	70349332	K4me3 K27ac
ENSMUSG00000021136.13	Smoc1	chr12	81024827	81028827	K4me3 K4me1
ENSMUSG00000021196.14	Pfkp	chr13	6596760	6600760	Unmarked
ENSMUSG00000021207.9	Akr1c21	chr13	4572074	4576074	K4me1
ENSMUSG00000021301.9	Hecw1	chr13	14316957	14320957	Repressed
ENSMUSG00000021418.15	Rpp40	chr13	35904328	35908328	K4me3
ENSMUSG00000021460.17	Auh	chr13	52927652	52931652	K4me3 K4me1 K27ac
ENSMUSG00000021496.12	Pcbd2	chr13	55725367	55729367	K4me3
ENSMUSG00000021548.10	Ccnh	chr13	85187407	85191407	K4me3 K27ac
ENSMUSG00000021594.11	Srd5a1	chr13	69592829	69596829	Unmarked
ENSMUSG00000021596.16	Mctp1	chr13	76823206	76827206	Unmarked
ENSMUSG00000021613.9	Hapln1	chr13	89582510	89586510	K4me3 K4me1 K27ac
ENSMUSG00000021647.7	Cartpt	chr13	99899091	99903091	Bivalent
ENSMUSG00000021676.10	Iqgap2	chr13	95889995	95893995	K4me3
ENSMUSG00000021700.10	Rab3c	chr13	110278150	110282150	Repressed
ENSMUSG00000021710.11	Nln	chr13	104034567	104038567	K4me1
ENSMUSG00000021730.8	Hcn1	chr13	117600479	117604479	Bivalent
ENSMUSG00000021795.10	Sftpd	chr14	41183149	41187149	Bivalent
ENSMUSG00000021806.4	Nid2	chr14	19803235	19807235	Unmarked
ENSMUSG00000021823.10	Vcl	chr14	21020002	21024002	Unmarked
ENSMUSG00000021850.14	ccdc198	chr14	49243397	49247397	K4me1
ENSMUSG00000021852.14	Slc35f4	chr14	49297273	49301273	K4me1
ENSMUSG00000022013.4	Dnajc15	chr14	77872926	77876926	K4me3 K27ac
ENSMUSG00000022018.7	Rgcc	chr14	79299645	79303645	K4me3
ENSMUSG00000022103.10	Gfra2	chr14	70888119	70892119	Repressed
ENSMUSG00000022220.14	Adcy4	chr14	55771089	55775089	Repressed
ENSMUSG00000022221.14	Ripk3	chr14	55786857	55790857	Repressed
ENSMUSG00000022300.10	Dcaf13	chr15	39110864	39114864	K4me3 K27ac
ENSMUSG00000022370.13	Mrpl13	chr15	55555349	55559349	K4me3 K27ac
ENSMUSG00000022519.14	Srl	chr16	4521063	4525063	K4me1
ENSMUSG00000022548.14	Apod	chr16	31312808	31316808	K4me1
ENSMUSG00000022551.8	Cyc1	chr15	76341566	76345566	K4me3
ENSMUSG00000022790.14	Igsf11	chr16	38890670	38894670	Unmarked
ENSMUSG00000022824.12	Muc13	chr16	33792036	33796036	Unmarked
ENSMUSG00000022971.18	Ifnar2	chr16	91370849	91374849	K4me3 K27ac
ENSMUSG00000023175.15	Bsg	chr10	79707597	79711597	K4me1
ENSMUSG00000023353.14	Agap3	chr5	24477752	24481752	Unmarked
ENSMUSG00000023886.10	Smoc2	chr17	14277536	14281536	Repressed
ENSMUSG00000023904.10	Hcfc1r1	chr17	23671595	23675595	K4me3 K4me1 K27ac
ENSMUSG00000023905.15	Tnfrsf12a	chr17	23675420	23679420	K4me3 K4me1 K27ac
ENSMUSG00000023914.16	Mep1a	chr17	43498482	43502482	K4me1
ENSMUSG00000024008.16	Cpne5	chr17	29236167	29240167	Bivalent
ENSMUSG00000024029.4	Tff3	chr17	31127646	31131646	K4me1
ENSMUSG00000024067.14	Dpy30	chr17	74314463	74318463	K4me3 K27ac
ENSMUSG00000024451.9	Arap3	chr18	37996733	38000733	Repressed
ENSMUSG00000024502.10	Jakmip2	chr18	43572245	43576245	Unmarked
ENSMUSG00000024503.3	Spink1	chr18	43735557	43739557	K4me3
ENSMUSG00000024517.17	Grp	chr18	65871503	65875503	Repressed
ENSMUSG00000024538.8	Ppic	chr18	53416115	53420115	Repressed
ENSMUSG00000024552.16	Slc14a2	chr18	78594942	78598942	Unmarked
ENSMUSG00000024575.16	Pde6a	chr18	61218314	61222314	Unmarked
ENSMUSG00000024598.9	Fbn2	chr18	58207926	58211926	Repressed
ENSMUSG00000024659.15	Anxa1	chr19	20388673	20392673	Repressed
ENSMUSG00000024664.5	Fads3	chr19	10054251	10058251	Bivalent
ENSMUSG00000024781.16	Lipa	chr19	34525411	34529411	K4me3 K4me1
ENSMUSG00000024827.10	Gldc	chr19	30173429	30177429	Bivalent
ENSMUSG00000025035.9	Arl3	chr19	46540813	46544813	Unmarked
ENSMUSG00000025044.16	Msr1	chr8	39640671	39644671	Repressed
ENSMUSG00000025068.8	Gsto1	chr19	47860994	47864994	Unmarked
ENSMUSG00000025069.15	Gsto2	chr19	47865640	47869640	K4me1
ENSMUSG00000025082.8	Vwa2	chr19	56872248	56876248	Bivalent
ENSMUSG00000025129.2	Ppp1r27	chr11	120549132	120553132	K4me3 K27ac
ENSMUSG00000025170.13	Rab40b	chr11	121386230	121390230	K4me3 K4me1
ENSMUSG00000025278.9	Flnb	chr14	7815956	7819956	K4me3 K27ac
ENSMUSG00000025393.12	Atp5b	chr10	128084229	128088229	K4me1
ENSMUSG00000025492.6	Ifitm3	chr7	141008770	141012770	K4me3
ENSMUSG00000025538.15	Sumf2	chr5	129844985	129848985	K4me3
ENSMUSG00000025545.10	Clybl	chr14	122256040	122260040	Bivalent
ENSMUSG00000025650.13	Col7a1	chr9	108952486	108956486	Unmarked
ENSMUSG00000025780.7	Itih5	chr2	10151570	10155570	Bivalent
ENSMUSG00000025875.14	Tspan17	chr13	54790870	54794870	Unmarked
ENSMUSG00000026014.15	Raph1	chr1	60564779	60568779	K4me3
ENSMUSG00000026162.7	Nhej1	chr1	75044639	75048639	K4me1
ENSMUSG00000026204.15	Ptprn	chr1	75262502	75266502	K4me3 K4me1 K27ac
ENSMUSG00000026260.12	Ndufa10	chr1	92471767	92475767	K4me3 K27ac
ENSMUSG00000026308.8	Klhl30	chr1	91349015	91353015	Bivalent
ENSMUSG00000026399.12	Cd55	chr1	130460451	130464451	K4me3
ENSMUSG00000026478.14	Lamc1	chr1	153237326	153241326	Unmarked
ENSMUSG00000026656.15	Fcgr2b	chr1	170974127	170978127	Unmarked
ENSMUSG00000026712.3	Mrc1	chr2	14326560	14330560	Unmarked
ENSMUSG00000026728.9	Vim	chr2	13577368	13581368	Repressed
ENSMUSG00000026737.12	Pip4k2a	chr2	18864120	18868120	Unmarked
ENSMUSG00000026840.14	Lamc3	chr2	31923056	31927056	Unmarked
ENSMUSG00000026950.18	Neb	chr2	52174614	52178614	Unmarked
ENSMUSG00000027048.15	Abcb11	chr2	69340616	69344616	Unmarked
ENSMUSG00000027078.14	Ube2l6	chr2	84800702	84804702	Unmarked
ENSMUSG00000027195.10	Hsd17b12	chr2	94064469	94068469	K4me1
ENSMUSG00000027238.17	Frmd5	chr2	121549351	121553351	Unmarked
ENSMUSG00000027298.17	Tyro3	chr2	119799115	119803115	Bivalent
ENSMUSG00000027316.15	Gfra4	chr2	131039457	131043457	Unmarked
ENSMUSG00000027322.11	Siglec1	chr2	131084765	131088765	Unmarked
ENSMUSG00000027406.13	Idh3b	chr2	130282415	130286415	K4me3 K27ac
ENSMUSG00000027474.13	Ccm2l	chr2	153063983	153067983	Repressed
ENSMUSG00000027533.10	Fabp5	chr3	10010547	10014547	Bivalent
ENSMUSG00000027605.18	Acss2	chr2	155516056	155520056	K4me3 K27ac
ENSMUSG00000027610.17	Gss	chr2	155590567	155594567	K4me3 K4me1 K27ac
ENSMUSG00000027613.15	Eif6	chr2	155824663	155828663	K4me3 K27ac
ENSMUSG00000027674.16	Pex5l	chr3	33081029	33085029	K4me1
ENSMUSG00000027710.14	Acad9	chr3	36074768	36078768	Unmarked
ENSMUSG00000027714.11	Exosc9	chr3	36550605	36554605	K4me3 K27ac
ENSMUSG00000027894.14	Slc6a17	chr3	107498530	107502530	K4me1
ENSMUSG00000027955.16	Gask1b	chr3	79884055	79888055	Repressed
ENSMUSG00000027961.7	Lrrc39	chr3	116560972	116564972	Bivalent
ENSMUSG00000028020.16	Glrb	chr3	80855255	80859255	Unmarked
ENSMUSG00000028047.11	Thbs3	chr3	89222288	89226288	Unmarked
ENSMUSG00000028048.11	Gba	chr3	89200939	89204939	Unmarked
ENSMUSG00000028085.12	Gatb	chr3	85572126	85576126	K4me3 K27ac
ENSMUSG00000028111.4	Ctsk	chr3	95497255	95501255	K4me1
ENSMUSG00000028125.14	Abca4	chr3	122072453	122076453	Unmarked
ENSMUSG00000028172.5	Tacr3	chr3	134827006	134831006	Repressed
ENSMUSG00000028364.15	Tnc	chr4	64018725	64022725	Unmarked
ENSMUSG00000028369.15	Svep1	chr4	58204688	58208688	Repressed
ENSMUSG00000028488.15	Sh3gl2	chr4	85203468	85207468	K4me3 K27ac
ENSMUSG00000028584.3	Lrrc38	chr4	143347756	143351756	Repressed
ENSMUSG00000028776.14	Tinagl1	chr4	130172820	130176820	Bivalent
ENSMUSG00000028843.8	Sh3bgrl3	chr4	134126737	134130737	K4me3 K27ac
ENSMUSG00000028849.17	Map7d1	chr4	126231548	126235548	Unmarked
ENSMUSG00000029030.14	Tprgl	chr4	154158166	154162166	K4me3 K4me1
ENSMUSG00000029036.18	Atad3a	chr4	155747343	155751343	Unmarked
ENSMUSG00000029090.12	Adgra3	chr5	50051379	50055379	K4me1
ENSMUSG00000029121.16	Crmp1	chr5	37266740	37270740	Unmarked
ENSMUSG00000029167.13	Ppargc1a	chr5	51551871	51555871	K4me3 K27ac
ENSMUSG00000029193.7	Cckar	chr5	53705253	53709253	Unmarked
ENSMUSG00000029231.15	Pdgfra	chr5	75151585	75155585	Bivalent
ENSMUSG00000029270.10	Dipk1a	chr5	107970998	107974998	Unmarked
ENSMUSG00000029304.14	Spp1	chr5	104434191	104438191	K4me3 K4me1 K27ac
ENSMUSG00000029309.7	Sparcl1	chr5	104111439	104115439	K4me1
ENSMUSG00000029322.12	Plac8	chr5	100570245	100574245	Unmarked
ENSMUSG00000029465.14	Arpc3	chr5	122389921	122393921	K4me3
ENSMUSG00000029484.12	Anxa3	chr5	96809065	96813065	Bivalent
ENSMUSG00000029570.5	Lfng	chr5	140609508	140613508	Bivalent
ENSMUSG00000029685.15	Asb15	chr6	24554071	24558071	Unmarked
ENSMUSG00000029695.13	Aass	chr6	23130986	23134986	Bivalent
ENSMUSG00000029718.14	Pcolce	chr5	137611762	137615762	Unmarked
ENSMUSG00000029722.15	Agfg2	chr5	137659762	137663762	K4me1
ENSMUSG00000029819.6	Npy	chr6	49820709	49824709	Bivalent
ENSMUSG00000029830.15	Svopl	chr6	38016611	38020611	Unmarked
ENSMUSG00000029859.6	Epha1	chr6	42371235	42375235	Bivalent
ENSMUSG00000030017.2	Reg3g	chr6	78466872	78470872	Unmarked
ENSMUSG00000030054.4	Gp9	chr6	87776071	87780071	K4me1
ENSMUSG00000030075.10	Cntn3	chr6	102571101	102575101	Unmarked
ENSMUSG00000030137.8	Tuba8	chr6	121208695	121212695	K4me3
ENSMUSG00000030158.12	Clec12b	chr6	129383874	129387874	K4me1
ENSMUSG00000030159.15	Clec1b	chr6	129395606	129399606	K4me1
ENSMUSG00000030189.15	Ybx3	chr6	131376502	131380502	Unmarked
ENSMUSG00000030208.15	Emp1	chr6	135360930	135364930	K4me3 K4me1
ENSMUSG00000030218.2	Mgp	chr6	136873823	136877823	Unmarked
ENSMUSG00000030219.13	Erp27	chr6	136920180	136924180	K4me1
ENSMUSG00000030220.13	Arhgdib	chr6	136939868	136943868	Unmarked
ENSMUSG00000030222.13	Rerg	chr6	137167732	137171732	K4me3 K4me1
ENSMUSG00000030247.9	Kcnj8	chr6	142569371	142573371	Bivalent
ENSMUSG00000030249.15	Abcc9	chr6	142700274	142704274	Bivalent
ENSMUSG00000030344.11	Akap3	chr6	126851159	126855159	Repressed
ENSMUSG00000030409.16	Dmpk	chr7	19084499	19088499	K4me3 K4me1 K27ac
ENSMUSG00000030428.16	Ttyh1	chr7	4117532	4121532	K4me3 K4me1
ENSMUSG00000030505.17	Prmt3	chr7	49796389	49800389	Unmarked
ENSMUSG00000030538.15	Cib1	chr7	80230581	80234581	K4me3 K27ac
ENSMUSG00000030562.17	Nox4	chr7	87244648	87248648	Repressed
ENSMUSG00000030605.15	Mfge8	chr7	79145560	79149560	Repressed
ENSMUSG00000030609.18	Aen	chr7	78900578	78904578	K4me1 K27ac
ENSMUSG00000030621.17	Me3	chr7	89630391	89634391	Bivalent
ENSMUSG00000030630.16	Fah	chr7	84603729	84607729	K4me3 K27ac
ENSMUSG00000030647.8	Ndufc2	chr7	97398102	97402102	K4me3 K27ac
ENSMUSG00000030652.11	Coq7	chr7	118531301	118535301	K4me3 K27ac
ENSMUSG00000030782.16	Tgfb1i1	chr7	128244995	128248995	K4me3 K4me1
ENSMUSG00000030849.18	Fgfr2	chr7	130264245	130268245	Bivalent
ENSMUSG00000030911.7	Zp2	chr7	120143183	120147183	K4me1 K27ac
ENSMUSG00000031502.11	Col4a1	chr8	11230439	11234439	K4me1
ENSMUSG00000031538.6	Plat	chr8	22755726	22759726	K4me3 K4me1
ENSMUSG00000031635.14	Anxa10	chr8	62121116	62125116	K4me1
ENSMUSG00000031671.11	Setd6	chr8	95713914	95717914	K4me3 K27ac
ENSMUSG00000031673.6	Cdh11	chr8	102783642	102787642	Bivalent
ENSMUSG00000031727.8	Pmfbp1	chr8	109492026	109496026	Unmarked
ENSMUSG00000031740.8	Mmp2	chr8	92838183	92842183	Repressed
ENSMUSG00000031787.8	Katnb1	chr8	95080595	95084595	K4me3 K27ac
ENSMUSG00000031825.16	Crispld2	chr8	120011207	120015207	Unmarked
ENSMUSG00000031875.7	Cmtm3	chr8	104338527	104342527	K4me3
ENSMUSG00000031997.9	Trpc6	chr9	8542195	8546195	Repressed
ENSMUSG00000032011.5	Thy1	chr9	44041383	44045383	Repressed
ENSMUSG00000032033.11	Barx2	chr9	31911462	31915462	Bivalent
ENSMUSG00000032083.8	Apoa1	chr9	46226720	46230720	Unmarked
ENSMUSG00000032085.5	Tagln	chr9	45934058	45938058	Unmarked
ENSMUSG00000032122.15	Slc37a2	chr9	37253738	37257738	K4me1
ENSMUSG00000032135.15	Mcam	chr9	44134860	44138860	K4me3
ENSMUSG00000032231.14	Anxa2	chr9	69478110	69482110	Unmarked
ENSMUSG00000032243.8	Itga11	chr9	62675859	62679859	Bivalent
ENSMUSG00000032279.11	Idh3a	chr9	54593093	54597093	Unmarked
ENSMUSG00000032281.11	Acsbg1	chr9	54641158	54645158	Unmarked
ENSMUSG00000032294.17	Pkm	chr9	59655239	59659239	K4me3 K4me1 K27ac
ENSMUSG00000032299.10	Commd4	chr9	57155125	57159125	K4me3 K27ac
ENSMUSG00000032363.15	Adamts7	chr9	90193127	90197127	Unmarked
ENSMUSG00000032380.9	Dapk2	chr9	66156222	66160222	Unmarked
ENSMUSG00000032503.18	Arpp21	chr9	112232423	112236423	Repressed
ENSMUSG00000032577.16	Mapkapk3	chr9	107287779	107291779	K4me3 K27ac
ENSMUSG00000032609.12	Klhdc8b	chr9	108459073	108463073	Bivalent
ENSMUSG00000032625.14	Thsd7a	chr6	12322693	12326693	Unmarked
ENSMUSG00000032766.9	Gng11	chr6	4001903	4005903	K4me3
ENSMUSG00000032834.11	Pwp2	chr10	78183149	78187149	K4me3 K27ac
ENSMUSG00000032878.16	Ccdc85a	chr11	28574437	28578437	Unmarked
ENSMUSG00000032925.16	Itgbl1	chr14	123657970	123661970	Bivalent
ENSMUSG00000032946.16	Rasgrp2	chr19	6399718	6403718	Bivalent
ENSMUSG00000032965.11	Ift57	chr16	49708921	49712921	K4me1
ENSMUSG00000033032.15	Afap1l1	chr18	61784660	61788660	Repressed
ENSMUSG00000033066.15	Gas7	chr11	67584535	67588535	Unmarked
ENSMUSG00000033083.16	Tbc1d4	chr14	101461223	101465223	Unmarked
ENSMUSG00000033152.13	Podxl2	chr6	88872045	88876045	K4me1
ENSMUSG00000033475.15	Tomm6	chr17	47686183	47690183	K4me3 K27ac
ENSMUSG00000033510.14	Otud7a	chr7	63442776	63446776	K4me3
ENSMUSG00000033721.16	Vav3	chr3	109571906	109575906	K4me1
ENSMUSG00000033854.10	Kcnk10	chr12	98572712	98576712	K4me3
ENSMUSG00000034295.10	Fhod3	chr18	24707444	24711444	K4me3 K27ac
ENSMUSG00000034472.13	Rasd2	chr8	75211943	75215943	K4me3 K4me1
ENSMUSG00000034520.14	Gjc1	chr11	102817179	102821179	Repressed
ENSMUSG00000034595.17	Ppp1r18	chr17	35864055	35868055	K4me3
ENSMUSG00000034729.16	Mrps10	chr17	47367196	47371196	K4me3 K27ac
ENSMUSG00000034771.15	Tle2	chr10	81580542	81584542	Unmarked
ENSMUSG00000034796.14	Cpne7	chr8	123115377	123119377	Repressed
ENSMUSG00000034891.13	Sncb	chr13	54764492	54768492	K4me3
ENSMUSG00000034990.15	Otoa	chr7	121081423	121085423	Unmarked
ENSMUSG00000035385.5	Ccl2	chr11	82033570	82037570	Unmarked
ENSMUSG00000035540.12	Gc	chr5	89455898	89459898	K4me3 K4me1 K27ac
ENSMUSG00000035559.9	Mpv17l2	chr8	70758900	70762900	K4me3 K27ac
ENSMUSG00000035615.12	Frmpd1	chr4	45182905	45186905	Unmarked
ENSMUSG00000035620.15	Ric8b	chr10	84915653	84919653	K4me3 K27ac
ENSMUSG00000035934.16	Pknox2	chr9	37143660	37147660	Repressed
ENSMUSG00000035960.14	Apex1	chr14	50922977	50926977	K4me3 K27ac
ENSMUSG00000036103.9	Colec12	chr18	9705600	9709600	Bivalent
ENSMUSG00000036144.6	Meox2	chr12	37106539	37110539	Bivalent
ENSMUSG00000036192.15	Rorb	chr19	18999100	19003100	Unmarked
ENSMUSG00000036199.9	Ndufa13	chr8	69900558	69904558	K4me3 K27ac
ENSMUSG00000036218.16	Pdzrn4	chr15	92741642	92745642	Unmarked
ENSMUSG00000036256.13	Igfbp7	chr5	77406040	77410040	K4me3 K27ac
ENSMUSG00000036273.15	Lrrk2	chr15	91671174	91675174	K4me3 K4me1
ENSMUSG00000036510.17	Cdh8	chr8	99414439	99418439	K4me3 K27ac
ENSMUSG00000036613.8	Eipr1	chr12	28860848	28864848	Unmarked
ENSMUSG00000036751.7	Cox6b1	chr7	30624151	30628151	K4me3 K27ac
ENSMUSG00000036766.12	Dner	chr1	84694019	84698019	K4me3
ENSMUSG00000036913.15	Trim67	chr8	124791091	124795091	K4me3 K27ac
ENSMUSG00000036938.17	Try5	chr6	41314841	41318841	Unmarked
ENSMUSG00000037032.16	Apbb1	chr7	105565294	105569294	K4me1
ENSMUSG00000037060.3	Cavin3	chr7	105480300	105484300	Repressed
ENSMUSG00000037108.13	Zcwpw1	chr5	137797188	137801188	Unmarked
ENSMUSG00000037206.15	Islr	chr9	58157221	58161221	Unmarked
ENSMUSG00000037362.8	Ccn3	chr15	54743701	54747701	Bivalent
ENSMUSG00000037605.16	Adgrl3	chr5	81643988	81647988	Unmarked
ENSMUSG00000037613.16	Tnfrsf23	chr7	143683872	143687872	K4me3 K27ac
ENSMUSG00000037716.15	Ccdc33	chr9	58112360	58116360	K4me1
ENSMUSG00000037736.20	Limch1	chr5	66896430	66900430	K4me1
ENSMUSG00000037855.15	Zfp365	chr10	67897007	67901007	Unmarked
ENSMUSG00000037907.16	Ankrd13b	chr11	77471625	77475625	Unmarked
ENSMUSG00000037916.14	Ndufv1	chr19	4010673	4014673	K4me3
ENSMUSG00000037921.15	Ddx60	chr8	61926088	61930088	K4me3 K27ac
ENSMUSG00000037942.5	Crp	chr1	172696055	172700055	K4me1
ENSMUSG00000038168.5	P3h2	chr16	26103784	26107784	K4me3 K4me1
ENSMUSG00000038188.17	Scarf1	chr11	75511539	75515539	Unmarked
ENSMUSG00000038370.6	Pcp4l1	chr1	171194268	171198268	Repressed
ENSMUSG00000038463.8	Olfml2b	chr1	170642531	170646531	Bivalent
ENSMUSG00000038515.10	Grtp1	chr8	13198556	13202556	K4me3 K27ac
ENSMUSG00000038600.12	Atp6v0a4	chr6	38122586	38126586	K4me1
ENSMUSG00000038811.13	Gngt2	chr11	95841231	95845231	Repressed
ENSMUSG00000039109.16	F13a1	chr13	37047187	37051187	Unmarked
ENSMUSG00000039178.9	Tbc1d19	chr5	53889103	53893103	Unmarked
ENSMUSG00000039195.4	1110008P14Rik	chr2	32379862	32383862	K4me3
ENSMUSG00000039405.7	Prss23	chr7	89516548	89520548	K4me3 K4me1
ENSMUSG00000039419.17	Cntnap2	chr6	45058060	45062060	K4me3 K27ac
ENSMUSG00000039438.7	Ttc36	chr9	44801072	44805072	K4me1
ENSMUSG00000039450.11	Dcxr	chr11	120725281	120729281	K4me3
ENSMUSG00000039481.5	Nrtn	chr17	56755530	56759530	K4me3
ENSMUSG00000039628.9	Hs3st6	chr17	24751002	24755002	K4me3 K4me1
ENSMUSG00000039629.14	Strip2	chr6	29915012	29919012	K4me3
ENSMUSG00000039997.16	Ifi203	chr1	173940492	173944492	Unmarked
ENSMUSG00000040086.13	Tnni3k	chr3	155053407	155057407	Unmarked
ENSMUSG00000040111.17	Gramd1b	chr9	40463564	40467564	Unmarked
ENSMUSG00000040213.13	Kyat3	chr3	142735611	142739611	Unmarked
ENSMUSG00000040270.16	Bach2	chr4	32237076	32241076	K4me3
ENSMUSG00000040274.11	Cdk6	chr5	3341731	3345731	K4me3
ENSMUSG00000040690.15	Col16a1	chr4	130075042	130079042	Bivalent
ENSMUSG00000040694.4	Apobec2	chr17	48430930	48434930	K4me1
ENSMUSG00000040797.16	Iqsec3	chr6	121471678	121475678	Repressed
ENSMUSG00000040824.3	Snrpd2	chr7	19147858	19151858	K4me3 K27ac
ENSMUSG00000040950.13	Mgl2	chr11	70128423	70132423	Unmarked
ENSMUSG00000040966.10	Slc22a2	chr17	12582192	12586192	K4me1
ENSMUSG00000041420.18	Meis3	chr7	16173274	16177274	K4me3 K27ac
ENSMUSG00000041482.17	Piezo2	chr18	63324649	63328649	Unmarked
ENSMUSG00000041559.7	Fmod	chr1	134035253	134039253	Repressed
ENSMUSG00000041577.5	Prelp	chr1	133919411	133923411	Repressed
ENSMUSG00000041670.17	Rims1	chr1	22313805	22317805	Bivalent
ENSMUSG00000041697.8	Cox6a1	chr5	115346914	115350914	K4me3 K27ac
ENSMUSG00000041765.6	Ubac2	chr14	121914202	121918202	Unmarked
ENSMUSG00000041774.16	Ydjc	chr16	17144982	17148982	K4me3
ENSMUSG00000041801.5	Phlda3	chr1	135764118	135768118	K4me3
ENSMUSG00000041949.6	Tango6	chr8	106681145	106685145	K4me3
ENSMUSG00000041992.9	Rapgef5	chr12	117593240	117597240	Unmarked
ENSMUSG00000042099.16	Kank3	chr17	33808522	33812522	Repressed
ENSMUSG00000042115.4	Klhdc8a	chr1	132296625	132300625	Bivalent
ENSMUSG00000042215.8	Bag2	chr1	33746719	33750719	Unmarked
ENSMUSG00000042604.5	Kcna4	chr2	107289394	107293394	Repressed
ENSMUSG00000042671.12	Rgs8	chr1	153663672	153667672	Unmarked
ENSMUSG00000042828.12	Trim72	chr7	128002377	128006377	Repressed
ENSMUSG00000042942.18	Greb1l	chr18	10507396	10511396	Unmarked
ENSMUSG00000043557.16	Mdga1	chr17	29833358	29837358	Unmarked
ENSMUSG00000043671.14	Dpy19l3	chr7	35723344	35727344	Unmarked
ENSMUSG00000043943.14	Naalad2	chr9	18400995	18404995	Unmarked
ENSMUSG00000043972.8	Opn5	chr17	42609395	42613395	Repressed
ENSMUSG00000044033.16	Ccdc141	chr2	77042730	77046730	K4me1
ENSMUSG00000044080.9	S100a1	chr3	90512392	90516392	K4me3 K4me1 K27ac
ENSMUSG00000044502.16	Bod1	chr11	31669885	31673885	K4me3 K27ac
ENSMUSG00000044533.15	Rps2	chr17	24719448	24723448	K4me3 K27ac
ENSMUSG00000044734.16	Serpinb1a	chr13	32849185	32853185	K4me1 K27ac
ENSMUSG00000044894.14	Uqcrq	chr11	53428827	53432827	K4me3 K4me1 K27ac
ENSMUSG00000044976.17	Wdr72	chr9	74108355	74112355	Repressed
ENSMUSG00000045160.14	Bola3	chr6	83350094	83354094	Unmarked
ENSMUSG00000045349.15	Sh2d5	chr4	138248463	138252463	K4me3 K27ac
ENSMUSG00000045404.16	Kcnk13	chr12	99962498	99966498	K4me3
ENSMUSG00000045672.15	Col27a1	chr4	63328992	63332992	Unmarked
ENSMUSG00000045868.12	Gvin1	chr7	106213310	106217310	Unmarked
ENSMUSG00000046442.4	Ppm1e	chr11	87357023	87361023	Repressed
ENSMUSG00000046500.8	Tafa4	chr6	97058413	97062413	Repressed
ENSMUSG00000046768.13	Rhoj	chr12	75306321	75310321	K4me3 K27ac
ENSMUSG00000046997.5	Spsb4	chr9	97016843	97020843	K4me3
ENSMUSG00000047497.10	Adamts12	chr15	11062808	11066808	Bivalent
ENSMUSG00000047821.16	Trim16	chr11	62818230	62822230	Bivalent
ENSMUSG00000047867.11	Gimap6	chr6	48706213	48710213	K4me3
ENSMUSG00000048332.13	Lhfp	chr3	53227324	53231324	Repressed
ENSMUSG00000048376.6	F2r	chr13	95616487	95620487	K4me3
ENSMUSG00000048458.8	Inka2	chr3	105703457	105707457	K4me3 K4me1
ENSMUSG00000048483.6	Zdhhc22	chr12	86986676	86990676	K4me3
ENSMUSG00000048612.16	Myof	chr19	38041351	38045351	Repressed
ENSMUSG00000048776.8	Pthlh	chr6	147262167	147266167	Repressed
ENSMUSG00000048827.12	Pkd1l3	chr8	109629331	109633331	Unmarked
ENSMUSG00000048960.13	Prex2	chr1	11096529	11100529	Unmarked
ENSMUSG00000048978.14	Nrsn1	chr13	25267970	25271970	K4me3
ENSMUSG00000049115.15	Agtr1a	chr13	30334440	30338440	Bivalent
ENSMUSG00000050147.9	F2rl3	chr8	72759883	72763883	Unmarked
ENSMUSG00000050335.17	Lgals3	chr14	47365750	47369750	Bivalent
ENSMUSG00000050370.5	Ch25h	chr19	34473164	34477164	Bivalent
ENSMUSG00000050666.14	Vstm4	chr14	32854755	32858755	K4me3
ENSMUSG00000050711.7	Scg2	chr1	79438042	79442042	K4me3 K27ac
ENSMUSG00000050830.17	Vwc2	chr11	11113850	11117850	Repressed
ENSMUSG00000051506.17	Wdfy4	chr14	33021337	33025337	Repressed
ENSMUSG00000052572.19	Dlg2	chr7	90474693	90478693	K4me3 K27ac
ENSMUSG00000053093.16	Myh7	chr14	54992626	54996626	Bivalent
ENSMUSG00000053199.13	Arhgap20	chr9	51763344	51767344	Bivalent
ENSMUSG00000053801.18	Grwd1	chr7	45828881	45832881	Unmarked
ENSMUSG00000053965.10	Pde5a	chr3	122793233	122797233	K4me1
ENSMUSG00000054134.14	Umodl1	chr17	30952678	30956678	Unmarked
ENSMUSG00000054206.2	Gzmm	chr10	79687019	79691019	Unmarked
ENSMUSG00000054321.7	Taf4b	chr18	14781244	14785244	K4me3 K27ac
ENSMUSG00000054435.16	Gimap4	chr6	48682577	48686577	Unmarked
ENSMUSG00000054555.11	Adam12	chr7	133959265	133963265	Unmarked
ENSMUSG00000054690.17	Emcn	chr3	137339142	137343142	K4me3
ENSMUSG00000054966.13	Lmntd1	chr6	145612319	145616319	Unmarked
ENSMUSG00000055116.8	Arntl	chr7	113232622	113236622	Unmarked
ENSMUSG00000055235.11	Wdr86	chr5	24728727	24732727	Repressed
ENSMUSG00000055865.8	Tafa3	chr3	104779840	104783840	Repressed
ENSMUSG00000056025.12	Clca3a1	chr3	144758977	144762977	Unmarked
ENSMUSG00000056367.14	Actr3b	chr5	25757996	25761996	K4me3
ENSMUSG00000056494.7	Cngb3	chr4	19278849	19282849	K4me1 K27ac
ENSMUSG00000056632.8	Dsg3	chr18	20508282	20512282	Unmarked
ENSMUSG00000057378.15	Ryr3	chr2	112906497	112910497	Unmarked
ENSMUSG00000057455.12	Rit2	chr18	31315290	31319290	K4me3 K4me1
ENSMUSG00000057963.9	Itpk1	chr12	102702930	102706930	K4me3 K4me1
ENSMUSG00000058076.12	Sdhc	chr1	171148591	171152591	K4me3 K27ac
ENSMUSG00000058119.6	Gm5771	chr6	41390355	41394355	Unmarked
ENSMUSG00000058145.16	Adamts17	chr7	66837734	66841734	K4me3
ENSMUSG00000058715.11	Fcer1g	chr1	171232339	171236339	K4me3 K4me1 K27ac
ENSMUSG00000058806.15	Col13a1	chr10	61977073	61981073	Repressed
ENSMUSG00000059049.14	Frem1	chr4	82968703	82972703	Unmarked
ENSMUSG00000059355.13	Wdr83os	chr8	85078739	85082739	K4me3 K27ac
ENSMUSG00000059734.7	Ndufs8	chr19	3910734	3914734	K4me3 K27ac
ENSMUSG00000060032.6	H2aj	chr6	136806243	136810243	K4me3
ENSMUSG00000060568.14	Fam78b	chr1	166999588	167003588	K4me3 K4me1
ENSMUSG00000060802.8	B2m	chr2	122145685	122149685	K4me3 K27ac
ENSMUSG00000061322.15	Dnaic1	chr4	41629643	41633643	K4me1 K27ac
ENSMUSG00000061518.11	Cox5b	chr1	36689448	36693448	K4me3 K27ac
ENSMUSG00000061576.15	Dpp6	chr5	27531776	27535776	K4me1
ENSMUSG00000061603.8	Akap6	chr12	52697382	52701382	Unmarked
ENSMUSG00000061762.12	Tac1	chr6	7554090	7558090	Bivalent
ENSMUSG00000062380.4	Tubb3	chr8	123409423	123413423	K4me3 K4me1 K27ac
ENSMUSG00000062515.3	Fabp4	chr3	10206576	10210576	Unmarked
ENSMUSG00000062751.5	Prss1	chr6	41456931	41460931	Unmarked
ENSMUSG00000063275.15	Hacd1	chr2	14054135	14058135	K4me3
ENSMUSG00000064293.14	Cntn4	chr6	106116917	106120917	Unmarked
ENSMUSG00000064317.5	Gm10146	chr10	78391319	78395319	K4me1
ENSMUSG00000064945.1	Rny3	chr6	47779623	47783623	K4me3 K4me1 K27ac
ENSMUSG00000066607.5	Insyn1	chr9	58486602	58490602	Bivalent
ENSMUSG00000066755.2	Tnfsf18	chr1	161492654	161496654	Unmarked
ENSMUSG00000067719.5	Gm10221	chr5	24579862	24583862	Unmarked
ENSMUSG00000067872.2	Ccdc87	chr19	4837365	4841365	K4me3
ENSMUSG00000068220.6	Lgals1	chr15	78924725	78928725	Unmarked
ENSMUSG00000068245.14	Phf11d	chr14	59363444	59367444	Unmarked
ENSMUSG00000068341.8	Reg3d	chr6	78376865	78380865	Repressed
ENSMUSG00000069307.6	Hist1h2bq	chr13	21808171	21812171	Unmarked
ENSMUSG00000069516.8	Lyz2	chr10	117280321	117284321	Unmarked
ENSMUSG00000069707.1	Taar4	chr10	23958493	23962493	K4me1 K27ac
ENSMUSG00000070371.11	Prss36	chr7	127933519	127937519	K4me3
ENSMUSG00000070424.12	Art5	chr7	102097493	102101493	K4me1
ENSMUSG00000070436.12	Serpinh1	chr7	99350997	99354997	Repressed
ENSMUSG00000070471.3	Erich6	chr3	58635207	58639207	K4me3 K4me1 K27ac
ENSMUSG00000070530.5	Wfdc16	chr2	164636796	164640796	K4me1
ENSMUSG00000070942.8	Il1rl2	chr1	40322626	40326626	K4me1
ENSMUSG00000070953.13	Rabepk	chr2	34797912	34801912	K4me3 K27ac
ENSMUSG00000071014.10	Ndufb6	chr4	40277409	40281409	K4me3 K27ac
ENSMUSG00000071202.5	Ccdc78	chr17	25784579	25788579	K4me3 K27ac
ENSMUSG00000071517.6	Gm10334	chr6	41444145	41448145	Unmarked
ENSMUSG00000071519.6	Prss3	chr6	41375678	41379678	Unmarked
ENSMUSG00000071521.4	Try10	chr6	41352104	41356104	Repressed
ENSMUSG00000071604.5	Fam189a2	chr19	24029019	24033019	Repressed
ENSMUSG00000072437.4	Nanos1	chr19	60753986	60757986	K4me3
ENSMUSG00000073599.10	Ecscr	chr18	35715290	35719290	Unmarked
ENSMUSG00000073856.11	Iqck	chr7	118853751	118857751	K4me3 K27ac
ENSMUSG00000073987.4	Ggh	chr4	20040051	20044051	K4me3
ENSMUSG00000074284.6	Gm10658	chr9	57069807	57073807	K4me3 K27ac
ENSMUSG00000074505.6	Fat3	chr9	15955822	15959822	Unmarked
ENSMUSG00000074643.12	Cpne1	chr2	156076591	156080591	K4me1
ENSMUSG00000075224.10	Lrrc55	chr2	85194699	85198699	Bivalent
ENSMUSG00000075478.3	Slitrk1	chr14	108912158	108916158	Repressed
ENSMUSG00000075704.16	Txnrd2	chr16	18426924	18430924	K4me1
ENSMUSG00000078252.1	Krtap17-1	chr11	99991994	99995994	Bivalent
ENSMUSG00000078636.4	Gm7336	chr7	51744646	51748646	Unmarked
ENSMUSG00000079017.3	Ifi27l2a	chr12	103441680	103445680	Unmarked
ENSMUSG00000079516.2	Reg3a	chr6	78378708	78382708	Repressed
ENSMUSG00000084128.10	Esrp2	chr8	106134813	106138813	K4me3 K4me1 K27ac
ENSMUSG00000085022.2	Gm5860	chr4	82063430	82067430	K4me3 K4me1 K27ac
ENSMUSG00000085077.1	1700049E15Rik	chr6	147688240	147692240	K4me1
ENSMUSG00000085328.2	Gm17131	chr5	127876530	127880530	Unmarked
ENSMUSG00000085541.1	Gm16010	chr9	97015473	97019473	K4me3
ENSMUSG00000085810.7	Gm16325	chr3	146646608	146650608	Unmarked
ENSMUSG00000085926.1	Gm12299	chr11	67000085	67004085	K4me1 K27ac
ENSMUSG00000085965.1	2310016D23Rik	chr1	60776842	60780842	Unmarked
ENSMUSG00000086044.1	A330043C09Rik	chr2	75175658	75179658	K4me1 K27ac
ENSMUSG00000086390.7	1810019D21Rik	chr8	106133399	106137399	K4me3 K27ac
ENSMUSG00000086706.7	Gm15848	chr1	130822084	130826084	K4me1 K27ac
ENSMUSG00000086741.1	Gm15816	chr8	23147585	23151585	Repressed
ENSMUSG00000087196.1	Gm13373	chr2	28322050	28326050	K4me1
ENSMUSG00000087242.2	C78197	chr11	68194153	68198153	K4me1
ENSMUSG00000087574.1	C030037D09Rik	chr11	88718488	88722488	Unmarked
ENSMUSG00000087579.7	Hectd2os	chr19	36687273	36691273	K4me1
ENSMUSG00000090002.1	Gm16006	chr15	57706927	57710927	K4me1 K27ac
ENSMUSG00000090137.8	Uba52	chr8	70508355	70512355	K4me3
ENSMUSG00000090223.2	Pcp4	chr16	96497619	96501619	K4me1
ENSMUSG00000090237.1	Gm16308	chr15	71808107	71812107	Unmarked
ENSMUSG00000090254.7	Gm1965	chr6	89139004	89143004	Unmarked
ENSMUSG00000090263.1	D730045A05Rik	chr18	74015906	74019906	Unmarked
ENSMUSG00000090996.1	Gm20458	chr2	164458966	164462966	K4me3 K27ac
ENSMUSG00000092071.1	A230065N10Rik	chr7	89631124	89635124	Bivalent
ENSMUSG00000094445.7	1700015G11Rik	chr7	52013728	52017728	Unmarked
ENSMUSG00000095937.1	Gm12671	chr4	91850669	91854669	Unmarked
ENSMUSG00000096257.2	Ccer2	chr7	28754173	28758173	Unmarked
ENSMUSG00000096525.2	Gm2663	chr6	40997479	41001479	Unmarked
ENSMUSG00000097310.2	A930038B10Rik	chr14	34757401	34761401	K4me1
ENSMUSG00000097636.8	Mirt1	chr19	53462783	53466783	Unmarked
ENSMUSG00000097789.2	Gm2115	chr7	84526953	84530953	K4me1
ENSMUSG00000098128.1	Gm3693	chr12	81226283	81230283	K4me1
ENSMUSG00000099519.1	Gm29253	chr1	75183146	75187146	Unmarked
ENSMUSG00000099988.7	1700054A03Rik	chr19	53074242	53078242	K4me1 K27ac
ENSMUSG00000100182.6	1810006J02Rik	chr1	98129455	98133455	K4me1 K27ac
ENSMUSG00000100303.3	2600014E21Rik	chr2	75136842	75140842	Bivalent
ENSMUSG00000100837.7	1700063D05Rik	chr9	41214947	41218947	Unmarked
ENSMUSG00000100965.1	Gm28449	chr1	61472950	61476950	Unmarked
ENSMUSG00000102549.1	Gm38137	chr1	60878337	60882337	K4me1
ENSMUSG00000103428.1	Gm20754	chr3	73064350	73068350	K4me3 K4me1
ENSMUSG00000104022.1	Gm37214	chr1	183418654	183422654	Unmarked
ENSMUSG00000104234.1	5330439B14Rik	chr6	142612594	142616594	K4me1 K27ac
ENSMUSG00000104610.1	Gm567	chr3	137287638	137291638	K4me1
ENSMUSG00000106270.1	C820005J03Rik	chr3	53754730	53758730	K4me3 K4me1 K27ac
ENSMUSG00000107167.3	Gm34653	chr2	34831006	34835006	Repressed
ENSMUSG00000107271.3	BC028471	chr5	149367045	149371045	Unmarked
ENSMUSG00000107314.1	Gm20488	chr5	149366475	149370475	Unmarked
ENSMUSG00000107877.2	Gm43951	chr11	72201371	72205371	Unmarked
ENSMUSG00000108687.1	Gm45007	chr7	73704540	73708540	K4me1
ENSMUSG00000108930.1	Gm10648	chr7	28874331	28878331	Unmarked
ENSMUSG00000109029.1	Gm44717	chr8	11147246	11151246	K4me1 K27ac
ENSMUSG00000109446.1	Gm9195	chr14	72489838	72493838	Repressed
ENSMUSG00000110353.1	Gm33543	chr10	95840896	95844896	K4me1
ENSMUSG00000112331.1	Gm33035	chr10	69031888	69035888	K4me1
ENSMUSG00000113650.1	Gm47826	chr13	9754879	9758879	K4me1
ENSMUSG00000113940.1	Gm40477	chr12	85434081	85438081	K4me1 K27ac
ENSMUSG00000114452.1	A530001N23Rik	chr13	60483967	60487967	K4me1
ENSMUSG00000115219.2	Eef1akmt4	chr16	20609592	20613592	K4me3 K27ac
ENSMUSG00000115426.1	Gm19510	chr15	59792959	59796959	K4me1 K27ac
ENSMUSG00000115811.1	Gm41293	chr15	36208705	36212705	K4me3 K4me1
ENSMUSG00000116066.1	Gm49477	chr15	103133880	103137880	K4me1 K27ac
ENSMUSG00000116810.1	Gm32624	chr16	86814873	86818873	K4me3 K4me1 K27ac
ENSMUSG00000116814.1	Gm49636	chr16	29752312	29756312	K4me1 K27ac
ENSMUSG00000117485.1	Gm19696	chr17	84133960	84137960	K4me1 K27ac
ENSMUSG00000117984.1	Gm31819	chr18	72723067	72727067	K4me1

## Sheet: Stable Islet
geneID	geneSymbol	Chr	Start	End	Chromatin State
ENSMUSG00000000001.4	Gnai3	chr3	108144146	108148146	K4me3 K27ac
ENSMUSG00000000028.15	Cdc45	chr16	18809987	18813987	K4me3 K27ac
ENSMUSG00000000056.7	Narf	chr11	121243019	121247019	Unmarked
ENSMUSG00000000058.6	Cav2	chr6	17279326	17283326	K4me3 K4me1
ENSMUSG00000000078.7	Klf6	chr13	5859540	5863540	K4me3 K27ac
ENSMUSG00000000085.16	Scmh1	chr4	120515625	120519625	K4me1 K27ac
ENSMUSG00000000093.6	Tbx2	chr11	85830550	85834550	Repressed
ENSMUSG00000000120.6	Ngfr	chr11	95585735	95589735	Unmarked
ENSMUSG00000000126.11	Wnt9a	chr11	59304929	59308929	Bivalent
ENSMUSG00000000127.15	Fer	chr17	63862014	63866014	K4me3 K27ac
ENSMUSG00000000131.15	Xpo6	chr7	126158871	126162871	K4me1
ENSMUSG00000000142.15	Axin2	chr11	108918348	108922348	K4me3
ENSMUSG00000000148.17	Brat1	chr5	140703051	140707051	Bivalent
ENSMUSG00000000149.10	Gna12	chr5	140828157	140832157	K4me3
ENSMUSG00000000154.16	Slc22a18	chr7	143471767	143475767	Unmarked
ENSMUSG00000000167.14	Pih1d2	chr9	50616006	50620006	K4me3 K27ac
ENSMUSG00000000168.9	Dlat	chr9	50644189	50648189	Unmarked
ENSMUSG00000000171.5	Sdhd	chr9	50601812	50605812	K4me3 K4me1 K27ac
ENSMUSG00000000184.12	Ccnd2	chr6	127149007	127153007	K4me3 K27ac
ENSMUSG00000000194.13	Gpr107	chr2	31170266	31174266	K4me1 K27ac
ENSMUSG00000000197.8	Nalcn	chr14	123624961	123628961	K4me3 K4me1 K27ac
ENSMUSG00000000202.9	Btbd17	chr11	114793892	114797892	K4me1 K27ac
ENSMUSG00000000253.13	Gmpr	chr13	45505443	45509443	K4me3 K27ac
ENSMUSG00000000275.16	Trim25	chr11	88997375	89001375	K4me3 K27ac
ENSMUSG00000000276.11	Dgke	chr11	89064850	89068850	Unmarked
ENSMUSG00000000278.10	Scpep1	chr11	88953465	88957465	K4me3 K27ac
ENSMUSG00000000282.12	Mnt	chr11	74835467	74839467	K4me3 K27ac
ENSMUSG00000000290.13	Itgb2	chr10	77528379	77532379	Unmarked
ENSMUSG00000000295.13	Hddc2	chr10	31311382	31315382	K4me3 K27ac
ENSMUSG00000000296.8	Tpd52l1	chr10	31443819	31447819	K4me3
ENSMUSG00000000305.12	Cdh4	chr2	179775162	179779162	Unmarked
ENSMUSG00000000308.14	Ckmt1	chr2	121356655	121360655	K4me3
ENSMUSG00000000317.11	Bcl6b	chr11	70227798	70231798	K4me3 K4me1 K27ac
ENSMUSG00000000320.10	Alox12	chr11	70253341	70257341	K4me3
ENSMUSG00000000325.16	Arvcf	chr16	18346273	18350273	K4me3
ENSMUSG00000000326.13	Comt	chr16	18411494	18415494	K4me1 K27ac
ENSMUSG00000000339.14	Rtca	chr3	116506065	116510065	K4me3 K27ac
ENSMUSG00000000340.10	Dbt	chr3	116518327	116522327	K4me1 K27ac
ENSMUSG00000000346.9	Dazap2	chr15	100614331	100618331	K4me3 K27ac
ENSMUSG00000000359.3	Rem1	chr2	152624950	152628950	Repressed
ENSMUSG00000000374.8	Trappc10	chr10	78242641	78246641	K4me3 K27ac
ENSMUSG00000000378.15	Ccm2	chr11	6544886	6548886	K4me3 K27ac
ENSMUSG00000000384.15	Tbrg4	chr11	6624043	6628043	K4me3 K27ac
ENSMUSG00000000385.8	Tmprss2	chr16	97608969	97612969	K4me3
ENSMUSG00000000386.16	Mx1	chr16	97458772	97462772	Unmarked
ENSMUSG00000000392.17	Fap	chr2	62561717	62565717	Repressed
ENSMUSG00000000399.10	Ndufa9	chr6	126847136	126851136	K4me3 K27ac
ENSMUSG00000000409.14	Lck	chr4	129554459	129558459	Bivalent
ENSMUSG00000000416.16	Cttnbp2	chr6	18512843	18516843	K4me3 K27ac
ENSMUSG00000000420.15	Galnt1	chr18	24236322	24240322	K4me1
ENSMUSG00000000439.9	Mkrn2	chr6	115599901	115603901	K4me3
ENSMUSG00000000440.12	Pparg	chr6	115358950	115362950	K4me3 K27ac
ENSMUSG00000000441.17	Raf1	chr6	115674635	115678635	K4me3 K27ac
ENSMUSG00000000486.13	Sept1	chr7	127213125	127217125	Unmarked
ENSMUSG00000000532.11	Acvr1b	chr15	101172066	101176066	K4me3 K27ac
ENSMUSG00000000538.18	Tom1l2	chr11	60350905	60354905	K4me3 K4me1 K27ac
ENSMUSG00000000552.10	Zfp385a	chr15	103338093	103342093	Bivalent
ENSMUSG00000000555.8	Itga5	chr15	103364763	103368763	Repressed
ENSMUSG00000000561.14	Wdr77	chr3	105957368	105961368	K4me3 K27ac
ENSMUSG00000000562.5	Adora3	chr3	105868857	105872857	K4me3 K4me1 K27ac
ENSMUSG00000000563.17	Atp5pb	chr3	105952181	105956181	K4me1
ENSMUSG00000000567.5	Sox9	chr11	112780223	112784223	Bivalent
ENSMUSG00000000568.15	Hnrnpd	chr5	99964387	99968387	K4me1
ENSMUSG00000000579.14	Dynlt1c	chr17	6599803	6603803	Unmarked
ENSMUSG00000000581.8	C1d	chr11	17255591	17259591	K4me3 K27ac
ENSMUSG00000000594.7	Gm2a	chr11	55096114	55100114	K4me3
ENSMUSG00000000600.15	Krit1	chr5	3813690	3817690	Unmarked
ENSMUSG00000000605.9	Clcn4	chr7	7294844	7298844	K4me3 K27ac
ENSMUSG00000000627.15	Sema4f	chr6	82915586	82919586	Repressed
ENSMUSG00000000628.10	Hk2	chr6	82770988	82774988	Bivalent
ENSMUSG00000000631.20	Myo18a	chr11	77848655	77852655	Unmarked
ENSMUSG00000000632.13	Sez6	chr11	77929038	77933038	Bivalent
ENSMUSG00000000682.7	Cd52	chr4	134093082	134097082	Unmarked
ENSMUSG00000000686.11	Abhd15	chr11	77516617	77520617	K4me3 K4me1 K27ac
ENSMUSG00000000693.10	Loxl3	chr6	83036399	83040399	Unmarked
ENSMUSG00000000708.14	Kat2b	chr17	53582125	53586125	K4me1 K27ac
ENSMUSG00000000711.3	Rab5b	chr10	128694257	128698257	K4me3 K27ac
ENSMUSG00000000732.9	Icosl	chr10	78071338	78075338	Unmarked
ENSMUSG00000000738.18	Spg7	chr8	123085407	123089407	Unmarked
ENSMUSG00000000739.14	Sult5a1	chr8	123156270	123160270	Unmarked
ENSMUSG00000000740.12	Rpl13	chr8	123100652	123104652	K4me3 K27ac
ENSMUSG00000000743.9	Chmp1a	chr8	123210760	123214760	K4me3 K27ac
ENSMUSG00000000751.13	Rpa1	chr11	75340188	75344188	K4me1 K27ac
ENSMUSG00000000759.14	Tubgcp3	chr8	12655620	12659620	Unmarked
ENSMUSG00000000766.18	Oprm1	chr10	6786808	6790808	Repressed
ENSMUSG00000000776.13	Polr3d	chr14	70441420	70445420	K4me3 K27ac
ENSMUSG00000000782.16	Tcf7	chr11	52280571	52284571	Unmarked
ENSMUSG00000000792.2	Slc5a5	chr8	70890757	70894757	K4me1
ENSMUSG00000000794.9	Kcnn3	chr3	89518163	89522163	K4me3 K27ac
ENSMUSG00000000804.14	Usp32	chr11	85038038	85042038	Unmarked
ENSMUSG00000000805.18	Car4	chr11	84955824	84959824	Bivalent
ENSMUSG00000000811.13	Txnrd3	chr6	89641987	89645987	K4me3
ENSMUSG00000000823.16	Zfp512b	chr2	181584361	181588361	Unmarked
ENSMUSG00000000826.16	Dnajc5	chr2	181547325	181551325	Unmarked
ENSMUSG00000000827.18	Tpd52l2	chr2	181495164	181499164	K4me3 K27ac
ENSMUSG00000000861.15	Bcl11a	chr11	24076172	24080172	K4me3
ENSMUSG00000000876.11	Pxmp4	chr2	154601708	154605708	K4me3 K4me1
ENSMUSG00000000901.17	Mmp11	chr10	75921993	75925993	Unmarked
ENSMUSG00000000902.13	Smarcb1	chr10	75913164	75917164	Unmarked
ENSMUSG00000000915.15	Hip1r	chr5	123992804	123996804	K4me1
ENSMUSG00000000916.15	Nsun5	chr5	135367990	135371990	K4me3 K27ac
ENSMUSG00000000934.9	Top1mt	chr15	75668265	75672265	Unmarked
ENSMUSG00000000942.10	Hoxa4	chr6	52189753	52193753	Repressed
ENSMUSG00000000948.16	Gm38393	chr7	60003064	60007064	K4me3 K27ac
ENSMUSG00000000957.11	Mmp14	chr14	54436591	54440591	Unmarked
ENSMUSG00000000958.10	Slc7a7	chr14	54415780	54419780	Repressed
ENSMUSG00000000959.7	Oxa1l	chr14	54358833	54362833	K4me3 K27ac
ENSMUSG00000000976.13	Heatr6	chr11	83772423	83776423	Unmarked
ENSMUSG00000000982.5	Ccl3	chr11	83647355	83651355	Repressed
ENSMUSG00000001016.12	Ilf2	chr3	90474139	90478139	K4me3 K27ac
ENSMUSG00000001017.15	Chtop	chr3	90507451	90511451	K4me3 K27ac
ENSMUSG00000001018.15	Snapin	chr3	90488993	90492993	K4me3
ENSMUSG00000001034.17	Mapk7	chr11	61491705	61495705	K4me3
ENSMUSG00000001036.17	Epn2	chr11	61544373	61548373	K4me1
ENSMUSG00000001039.12	B9d1	chr11	61510314	61514314	Unmarked
ENSMUSG00000001052.15	Sec24b	chr3	130038863	130042863	K4me1 K27ac
ENSMUSG00000001053.15	N4bp3	chr11	51648837	51652837	K4me3
ENSMUSG00000001054.9	Rmnd5b	chr11	51633647	51637647	K4me3 K27ac
ENSMUSG00000001062.18	Vps9d1	chr8	123244930	123248930	Unmarked
ENSMUSG00000001065.15	Zfp276	chr8	123257459	123261459	Unmarked
ENSMUSG00000001082.12	Mfsd10	chr5	34634807	34638807	K4me3 K27ac
ENSMUSG00000001089.14	Luzp1	chr4	136538353	136542353	Unmarked
ENSMUSG00000001098.15	Kctd10	chr5	114366669	114370669	Unmarked
ENSMUSG00000001100.10	Poldip2	chr11	78510415	78514415	K4me3 K27ac
ENSMUSG00000001105.15	Ift20	chr11	78534442	78538442	K4me3 K4me1 K27ac
ENSMUSG00000001120.15	Pcbp3	chr10	76795864	76799864	K4me1
ENSMUSG00000001123.15	Lgals9	chr11	78968330	78972330	Unmarked
ENSMUSG00000001138.13	Cnnm3	chr1	36509866	36513866	K4me3 K4me1
ENSMUSG00000001143.13	Lman2l	chr1	36426366	36430366	Unmarked
ENSMUSG00000001150.7	Mcm3ap	chr10	76508893	76512893	Unmarked
ENSMUSG00000001151.10	Pcnt	chr10	76412032	76416032	Unmarked
ENSMUSG00000001156.9	Mxd1	chr6	86667161	86671161	K4me3 K4me1 K27ac
ENSMUSG00000001157.13	Gmcl1	chr6	86716606	86720606	Unmarked
ENSMUSG00000001158.13	Snrnp27	chr6	86682517	86686517	K4me3 K27ac
ENSMUSG00000001166.17	Oas1c	chr5	120810488	120814488	K4me3 K27ac
ENSMUSG00000001175.15	Calm1	chr12	100198158	100202158	K4me3 K27ac
ENSMUSG00000001211.15	Agpat3	chr10	78305550	78309550	K4me1
ENSMUSG00000001227.12	Sema6b	chr17	56131843	56135843	K4me3
ENSMUSG00000001228.14	Uhrf1	chr17	56302347	56306347	K4me3
ENSMUSG00000001229.9	Dpp9	chr17	56207208	56211208	K4me1 K27ac
ENSMUSG00000001240.13	Ramp2	chr11	101244932	101248932	K4me3 K4me1
ENSMUSG00000001247.16	Lsr	chr7	30971426	30975426	K4me3 K4me1 K27ac
ENSMUSG00000001248.15	Gramd1a	chr7	31141712	31145712	Unmarked
ENSMUSG00000001249.14	Hpn	chr7	31098283	31102283	Unmarked
ENSMUSG00000001260.10	Gabrg1	chr5	70840314	70844314	Repressed
ENSMUSG00000001280.13	Sp1	chr15	102405587	102409587	K4me3
ENSMUSG00000001285.12	Myg1	chr15	102334770	102338770	Unmarked
ENSMUSG00000001288.15	Rarg	chr15	102250640	102254640	Unmarked
ENSMUSG00000001289.12	Pfdn5	chr15	102324147	102328147	K4me3 K27ac
ENSMUSG00000001300.16	Efnb2	chr8	8637363	8641363	Unmarked
ENSMUSG00000001305.5	Rrp15	chr1	186747325	186751325	K4me3 K27ac
ENSMUSG00000001323.17	Srr	chr11	74923798	74927798	K4me3 K27ac
ENSMUSG00000001333.9	Sync	chr4	129285616	129289616	K4me1 K27ac
ENSMUSG00000001348.15	Acp5	chr9	22133691	22137691	Unmarked
ENSMUSG00000001349.5	Cnn1	chr9	22097267	22101267	Repressed
ENSMUSG00000001366.14	Fbxo9	chr9	78085636	78089636	Unmarked
ENSMUSG00000001376.17	Vps50	chr6	3515811	3519811	K4me1
ENSMUSG00000001380.7	Hars	chr18	36781122	36785122	K4me3 K27ac
ENSMUSG00000001383.9	Zmat2	chr18	36791875	36795875	K4me3 K27ac
ENSMUSG00000001403.13	Ube2c	chr2	164767902	164771902	K4me3
ENSMUSG00000001415.10	Smg5	chr3	88340440	88344440	K4me1
ENSMUSG00000001416.13	Cct3	chr3	88295152	88299152	K4me3 K27ac
ENSMUSG00000001418.13	Glmp	chr3	88323054	88327054	K4me1
ENSMUSG00000001419.17	Mef2d	chr3	88140573	88144573	K4me3 K4me1 K27ac
ENSMUSG00000001420.13	Tmem79	chr3	88334148	88338148	K4me3 K4me1 K27ac
ENSMUSG00000001424.14	Snd1	chr6	28846906	28850906	K4me1
ENSMUSG00000001436.15	Slc19a1	chr10	77030270	77034270	K4me3
ENSMUSG00000001440.5	Kpnb1	chr11	97163400	97167400	Unmarked
ENSMUSG00000001441.13	Npepps	chr11	97240783	97244783	K4me1
ENSMUSG00000001445.10	Mrpl10	chr11	97039559	97043559	K4me3 K27ac
ENSMUSG00000001467.5	Cyp51	chr5	4102421	4106421	K4me3 K27ac
ENSMUSG00000001472.17	Tcf25	chr8	123395812	123399812	Unmarked
ENSMUSG00000001473.7	Tubb6	chr18	67390266	67394266	K4me3
ENSMUSG00000001482.15	Def8	chr8	123421526	123425526	Unmarked
ENSMUSG00000001493.9	Meox1	chr11	101892374	101896374	Repressed
ENSMUSG00000001504.10	Irx2	chr13	72627824	72631824	K4me3
ENSMUSG00000001506.10	Col1a1	chr11	94934223	94938223	Repressed
ENSMUSG00000001507.16	Itga3	chr11	95074797	95078797	K4me3 K27ac
ENSMUSG00000001517.14	Foxm1	chr6	128363704	128367704	Unmarked
ENSMUSG00000001518.12	Itfg2	chr6	128422912	128426912	K4me3 K27ac
ENSMUSG00000001520.12	Nrip2	chr6	128397295	128401295	Repressed
ENSMUSG00000001521.12	Tulp3	chr6	128353851	128357851	K4me3
ENSMUSG00000001524.14	Gtf2h4	chr17	35671298	35675298	Unmarked
ENSMUSG00000001525.10	Tubb5	chr17	35836306	35840306	K4me3 K27ac
ENSMUSG00000001542.7	Ell2	chr13	75705584	75709584	K4me3 K27ac
ENSMUSG00000001552.14	Jup	chr11	100395749	100399749	K4me3 K27ac
ENSMUSG00000001555.10	Fkbp10	chr11	100418423	100422423	Unmarked
ENSMUSG00000001558.5	Klhl10	chr11	100439926	100443926	K4me3
ENSMUSG00000001566.9	Mnx1	chr5	29476470	29480470	K4me3 K27ac
ENSMUSG00000001569.10	Nom1	chr5	29432663	29436663	K4me3 K27ac
ENSMUSG00000001576.15	Ergic1	chr17	26605891	26609891	Unmarked
ENSMUSG00000001604.14	Tcea3	chr4	136245728	136249728	Bivalent
ENSMUSG00000001622.15	Csn3	chr5	87925810	87929810	Unmarked
ENSMUSG00000001627.12	Ifrd1	chr12	40221149	40225149	K4me3 K27ac
ENSMUSG00000001630.13	Stk38l	chr6	146722994	146726994	K4me3 K4me1 K27ac
ENSMUSG00000001632.16	Brpf1	chr6	113305428	113309428	K4me3 K27ac
ENSMUSG00000001642.18	Akr1b3	chr6	34315430	34319430	K4me3 K27ac
ENSMUSG00000001665.11	Gstt3	chr10	75779050	75783050	K4me1
ENSMUSG00000001666.8	Ddt	chr10	75771414	75775414	K4me3
ENSMUSG00000001672.14	Marveld3	chr8	109960168	109964168	K4me3 K27ac
ENSMUSG00000001674.11	Ddx18	chr1	121565989	121569989	Bivalent
ENSMUSG00000001687.15	Ubl3	chr5	148550789	148554789	K4me3 K27ac
ENSMUSG00000001707.8	Eef1e1	chr13	38657058	38661058	K4me3
ENSMUSG00000001729.14	Akt1	chr12	112654973	112658973	Unmarked
ENSMUSG00000001739.14	Cldn15	chr5	136965868	136969868	Unmarked
ENSMUSG00000001741.12	Il16	chr7	83653495	83657495	K4me1
ENSMUSG00000001750.16	Tcirg1	chr19	3896853	3900853	Unmarked
ENSMUSG00000001751.9	Naglu	chr11	101069551	101073551	K4me3 K27ac
ENSMUSG00000001755.12	Coasy	chr11	101080617	101084617	K4me3 K27ac
ENSMUSG00000001761.7	Smo	chr6	29733693	29737693	Repressed
ENSMUSG00000001763.14	Tspan33	chr6	29692221	29696221	K4me3
ENSMUSG00000001767.5	Crnkl1	chr2	145929391	145933391	Unmarked
ENSMUSG00000001768.16	Rin2	chr2	145784161	145788161	K4me1
ENSMUSG00000001774.8	Chordc1	chr9	18290387	18294387	K4me3 K27ac
ENSMUSG00000001783.3	Rtcb	chr10	85955823	85959823	K4me3 K27ac
ENSMUSG00000001785.13	Pwp1	chr10	85869830	85873830	K4me3
ENSMUSG00000001786.14	Fbxo7	chr10	86040451	86044451	K4me1
ENSMUSG00000001794.13	Capns1	chr7	30196811	30200811	Unmarked
ENSMUSG00000001802.16	Lrp3	chr7	35201225	35205225	Unmarked
ENSMUSG00000001827.12	Folr1	chr7	101866667	101870667	K4me1
ENSMUSG00000001829.17	Clpb	chr7	101661774	101665774	K4me3
ENSMUSG00000001833.17	Sept7	chr9	25250647	25254647	K4me3 K27ac
ENSMUSG00000001844.10	Zdhhc4	chr5	143327202	143331202	K4me3 K27ac
ENSMUSG00000001847.14	Rac1	chr5	143516182	143520182	K4me1 K27ac
ENSMUSG00000001855.15	Nup214	chr2	32023294	32027294	Unmarked
ENSMUSG00000001870.16	Ltbp1	chr17	75308155	75312155	Unmarked
ENSMUSG00000001891.16	Ugp2	chr11	21321502	21325502	Unmarked
ENSMUSG00000001901.15	Kcnh6	chr11	106006172	106010172	K4me3 K27ac
ENSMUSG00000001909.16	Trmt1	chr8	84687285	84691285	K4me3 K4me1
ENSMUSG00000001910.5	Nacc1	chr8	84674995	84678995	Unmarked
ENSMUSG00000001911.16	Nfix	chr8	84798344	84802344	K4me3
ENSMUSG00000001918.17	Slc1a5	chr7	16783665	16787665	Unmarked
ENSMUSG00000001930.17	Vwf	chr6	125550962	125554962	Unmarked
ENSMUSG00000001942.8	Siae	chr9	37611669	37615669	K4me3 K27ac
ENSMUSG00000001943.8	Vsig2	chr9	37539271	37543271	Unmarked
ENSMUSG00000001946.14	Esam	chr9	37526780	37530780	K4me3
ENSMUSG00000001948.10	Spa17	chr9	37611722	37615722	K4me3 K27ac
ENSMUSG00000001983.7	Taco1	chr11	106064060	106068060	K4me3 K27ac
ENSMUSG00000001985.9	Grik3	chr4	125488699	125492699	Bivalent
ENSMUSG00000001995.9	Sipa1l2	chr8	125567756	125571756	K4me3 K27ac
ENSMUSG00000001998.15	Ap4e1	chr2	127006751	127010751	K4me3 K4me1
ENSMUSG00000001999.15	Blvra	chr2	127068692	127072692	K4me1
ENSMUSG00000002017.10	Fam98a	chr17	75549946	75553946	K4me3 K27ac
ENSMUSG00000002028.13	Kmt2a	chr9	44879296	44883296	K4me3 K27ac
ENSMUSG00000002031.13	Ift46	chr9	44771152	44775152	K4me3 K27ac
ENSMUSG00000002032.17	Tmem25	chr9	44797206	44801206	K4me3
ENSMUSG00000002043.17	Trappc6a	chr7	19506729	19510729	K4me3 K27ac
ENSMUSG00000002052.6	Supt6	chr11	78221686	78225686	Unmarked
ENSMUSG00000002055.9	Spag5	chr11	78299528	78303528	K4me3
ENSMUSG00000002057.4	Foxn1	chr11	78384558	78388558	Unmarked
ENSMUSG00000002058.13	Unc119	chr11	78341505	78345505	K4me3
ENSMUSG00000002064.10	Sdf2	chr11	78248420	78252420	K4me1
ENSMUSG00000002068.16	Ccne1	chr7	38104908	38108908	K4me3
ENSMUSG00000002083.13	Bbc3	chr7	16311516	16315516	K4me3 K4me1 K27ac
ENSMUSG00000002102.15	Psmc3	chr2	91052477	91056477	K4me3 K27ac
ENSMUSG00000002103.16	Acp2	chr2	91200923	91204923	K4me3 K27ac
ENSMUSG00000002105.15	Slc39a13	chr2	91066871	91070871	K4me3 K27ac
ENSMUSG00000002107.18	Celf2	chr2	6882996	6886996	Repressed
ENSMUSG00000002108.10	Nr1h3	chr2	91193035	91197035	Unmarked
ENSMUSG00000002109.14	Ddb2	chr2	91234982	91238982	K4me3 K27ac
ENSMUSG00000002111.8	Spi1	chr2	91094779	91098779	Unmarked
ENSMUSG00000002129.11	Sf3a1	chr11	4158354	4162354	K4me3 K27ac
ENSMUSG00000002190.13	Clgn	chr8	83387866	83391866	Repressed
ENSMUSG00000002205.16	Vrk3	chr7	44754985	44758985	Unmarked
ENSMUSG00000002210.11	Smg9	chr7	24397618	24401618	K4me3 K27ac
ENSMUSG00000002221.11	Paxip1	chr5	27789691	27793691	Bivalent
ENSMUSG00000002222.14	Rmnd5a	chr6	71395198	71399198	Unmarked
ENSMUSG00000002227.15	Mov10	chr3	104816116	104820116	K4me3 K27ac
ENSMUSG00000002228.7	Ppm1j	chr3	104783608	104787608	Unmarked
ENSMUSG00000002233.13	Rhoc	chr3	104787033	104791033	K4me3 K27ac
ENSMUSG00000002249.21	Tead3	chr17	28333415	28337415	Unmarked
ENSMUSG00000002250.16	Ppard	chr17	28230773	28234773	K4me3 K27ac
ENSMUSG00000002257.8	Def6	chr17	28205802	28209802	Unmarked
ENSMUSG00000002279.19	Lmf1	chr17	25577186	25581186	Bivalent
ENSMUSG00000002280.11	Ciao3	chr17	25771816	25775816	K4me3 K27ac
ENSMUSG00000002289.16	Angptl4	chr17	33776465	33780465	K4me1
ENSMUSG00000002297.16	Dbf4	chr5	8401191	8405191	Unmarked
ENSMUSG00000002307.16	Daxx	chr17	33908276	33912276	K4me3 K27ac
ENSMUSG00000002319.16	Ipo4	chr14	55624417	55628417	Unmarked
ENSMUSG00000002320.15	Tm9sf1	chr14	55641771	55645771	K4me3 K27ac
ENSMUSG00000002325.15	Irf9	chr14	55602578	55606578	Unmarked
ENSMUSG00000002326.6	Gmpr2	chr14	55669940	55673940	K4me3 K27ac
ENSMUSG00000002329.7	Mdp1	chr14	55658508	55662508	K4me3
ENSMUSG00000002332.16	Dhrs1	chr14	55743599	55747599	K4me3
ENSMUSG00000002342.17	Tmem161a	chr8	70170407	70174407	K4me1
ENSMUSG00000002343.11	Armc6	chr8	70223177	70227177	Unmarked
ENSMUSG00000002345.18	Borcs8	chr8	70137706	70141706	K4me3 K27ac
ENSMUSG00000002346.16	Slc25a42	chr8	70210305	70214305	K4me3 K27ac
ENSMUSG00000002365.10	Snx9	chr17	5839351	5843351	K4me3 K27ac
ENSMUSG00000002372.9	Ranbp3	chr17	56671380	56675380	K4me3 K27ac
ENSMUSG00000002393.14	Nr2f6	chr8	71379090	71383090	K4me3 K27ac
ENSMUSG00000002395.14	Use1	chr8	71364941	71368941	K4me3 K27ac
ENSMUSG00000002396.8	Ocel1	chr8	71369297	71373297	K4me3 K27ac
ENSMUSG00000002409.18	Dyrk1b	chr7	28177493	28181493	K4me3 K27ac
ENSMUSG00000002413.15	Braf	chr6	39723193	39727193	K4me3 K27ac
ENSMUSG00000002416.13	Ndufb2	chr6	39590587	39594587	K4me3 K27ac
ENSMUSG00000002428.12	Hltf	chr3	20055810	20059810	K4me3 K27ac
ENSMUSG00000002455.14	Prpf6	chr2	181599372	181603372	K4me3 K4me1 K27ac
ENSMUSG00000002458.13	Rgs19	chr2	181691810	181695810	K4me3
ENSMUSG00000002459.17	Rgs20	chr1	5017539	5021539	Repressed
ENSMUSG00000002475.16	Abhd3	chr18	10704771	10708771	K4me3 K27ac
ENSMUSG00000002477.5	Snrpd1	chr18	10615795	10619795	K4me3 K27ac
ENSMUSG00000002486.15	Tchp	chr5	114712634	114716634	Unmarked
ENSMUSG00000002496.10	Tsc2	chr17	24595058	24599058	Unmarked
ENSMUSG00000002504.15	Slc9a3r2	chr17	24642957	24646957	K4me3
ENSMUSG00000002524.17	Puf60	chr15	76078882	76082882	K4me3 K27ac
ENSMUSG00000002546.16	Golga2	chr2	32286350	32290350	K4me3 K27ac
ENSMUSG00000002550.16	Uck1	chr2	32254669	32258669	Unmarked
ENSMUSG00000002565.16	Scin	chr12	40132228	40136228	K4me3 K4me1
ENSMUSG00000002578.18	Ikzf4	chr10	128667358	128671358	Unmarked
ENSMUSG00000002580.7	Mien1	chr11	98436991	98440991	K4me3 K27ac
ENSMUSG00000002602.16	Axl	chr7	25762413	25766413	Repressed
ENSMUSG00000002603.15	Tgfb1	chr7	25686889	25690889	K4me3 K4me1
ENSMUSG00000002608.8	Ccdc97	chr7	25717006	25721006	K4me3 K27ac
ENSMUSG00000002617.14	Zfp40	chr17	23191210	23195210	K4me3 K4me1
ENSMUSG00000002625.10	Akap8l	chr17	32331481	32335481	Unmarked
ENSMUSG00000002635.11	Pdcd2l	chr7	34194608	34198608	K4me3 K27ac
ENSMUSG00000002658.9	Gtf2f1	chr17	57009288	57013288	K4me3 K27ac
ENSMUSG00000002660.8	Clpp	chr17	56988304	56992304	K4me3 K27ac
ENSMUSG00000002661.14	Alkbh7	chr17	56995342	56999342	K4me1
ENSMUSG00000002668.8	Dennd1c	chr17	57072150	57076150	Unmarked
ENSMUSG00000002679.14	Med6	chr12	81593008	81597008	K4me3 K27ac
ENSMUSG00000002688.8	Prkd1	chr12	50647098	50651098	K4me3 K4me1
ENSMUSG00000002699.13	Lcp2	chr11	34076176	34080176	Unmarked
ENSMUSG00000002718.14	Cse1l	chr2	166925564	166929564	Unmarked
ENSMUSG00000002728.14	Naa20	chr2	145909899	145913899	K4me1 K27ac
ENSMUSG00000002731.6	Prkra	chr2	76638733	76642733	Unmarked
ENSMUSG00000002732.14	Fkbp7	chr2	76671116	76675116	K4me3 K27ac
ENSMUSG00000002733.8	Plekha3	chr2	76673280	76677280	K4me3 K4me1
ENSMUSG00000002741.9	Ykt6	chr11	5957303	5961303	K4me1
ENSMUSG00000002748.7	Baz1b	chr5	135185263	135189263	K4me3 K27ac
ENSMUSG00000002763.16	Pex6	chr17	46709462	46713462	K4me3
ENSMUSG00000002767.13	Mrpl2	chr17	46644242	46648242	K4me3 K27ac
ENSMUSG00000002768.8	Mea1	chr17	46678694	46682694	K4me3 K27ac
ENSMUSG00000002769.9	Gnmt	chr17	46724801	46728801	Unmarked
ENSMUSG00000002778.14	Kdelr1	chr7	45870886	45874886	Repressed
ENSMUSG00000002781.19	Tmem143	chr7	45895083	45899083	K4me3 K27ac
ENSMUSG00000002797.9	Ggct	chr6	54990863	54994863	K4me3
ENSMUSG00000002803.14	Btbd6	chr12	112974481	112978481	K4me3
ENSMUSG00000002804.4	Nudt14	chr12	112940117	112944117	K4me3
ENSMUSG00000002812.4	Flii	chr11	60725223	60729223	K4me3 K27ac
ENSMUSG00000002814.15	Top3a	chr11	60775265	60779265	K4me3 K27ac
ENSMUSG00000002820.6	Atg4d	chr9	21263292	21267292	K4me3 K4me1
ENSMUSG00000002825.8	Qtrt1	chr9	21409901	21413901	K4me3 K27ac
ENSMUSG00000002833.11	Hdgfl2	chr17	56096980	56100980	Unmarked
ENSMUSG00000002835.9	Chaf1a	chr17	56055742	56059742	Unmarked
ENSMUSG00000002844.9	Adprh	chr16	38450682	38454682	K4me3 K27ac
ENSMUSG00000002845.14	Tmem39a	chr16	38562188	38566188	K4me3 K27ac
ENSMUSG00000002846.9	Timmdc1	chr16	38520641	38524641	K4me3 K27ac
ENSMUSG00000002847.7	Pla1a	chr16	38431145	38435145	Unmarked
ENSMUSG00000002870.8	Mcm2	chr6	88891185	88895185	Unmarked
ENSMUSG00000002871.14	Tpra1	chr6	88905988	88909988	Unmarked
ENSMUSG00000002881.14	Nab1	chr1	52498315	52502315	K4me3 K27ac
ENSMUSG00000002897.5	Il17ra	chr6	120461246	120465246	K4me3
ENSMUSG00000002910.11	Arrdc2	chr8	70834587	70838587	Unmarked
ENSMUSG00000002944.15	Cd36	chr5	17847729	17851729	Unmarked
ENSMUSG00000002948.19	Map2k7	chr8	4244672	4248672	Unmarked
ENSMUSG00000002949.15	Timm44	chr8	4264982	4268982	Unmarked
ENSMUSG00000002957.11	Ap2a2	chr7	141560207	141564207	K4me3 K27ac
ENSMUSG00000002963.17	Pnkp	chr7	44855347	44859347	K4me3 K27ac
ENSMUSG00000002968.9	Med25	chr7	44881184	44885184	Unmarked
ENSMUSG00000002980.14	Bcam	chr7	19768495	19772495	K4me3
ENSMUSG00000002981.10	Clptm1	chr7	19662955	19666955	K4me3 K27ac
ENSMUSG00000002983.17	Relb	chr7	19627438	19631438	K4me3 K27ac
ENSMUSG00000002984.17	Tomm40	chr7	19701577	19705577	Unmarked
ENSMUSG00000002985.16	Apoe	chr7	19696621	19700621	Bivalent
ENSMUSG00000002996.17	Hbp1	chr12	31948210	31952210	K4me3 K4me1 K27ac
ENSMUSG00000002997.15	Prkar2b	chr12	32059235	32063235	K4me3 K4me1
ENSMUSG00000003031.14	Cdkn1b	chr6	134918400	134922400	K4me3 K27ac
ENSMUSG00000003032.8	Klf4	chr4	55530466	55534466	K4me3 K27ac
ENSMUSG00000003033.15	Ap1m1	chr8	72238322	72242322	K4me3 K27ac
ENSMUSG00000003037.16	Rab8a	chr8	72159199	72163199	K4me3 K27ac
ENSMUSG00000003038.15	Hmgn2	chr4	133965251	133969251	K4me3 K27ac
ENSMUSG00000003039.9	Fam32a	chr8	72217729	72221729	K4me3 K27ac
ENSMUSG00000003051.13	Elf3	chr1	135256438	135260438	K4me3 K27ac
ENSMUSG00000003062.13	Stard3nl	chr13	19357125	19361125	Unmarked
ENSMUSG00000003068.16	Stk11	chr10	80123374	80127374	K4me1
ENSMUSG00000003099.11	Ppp5c	chr7	17005083	17009083	Unmarked
ENSMUSG00000003119.14	Cdk12	chr11	98201313	98205313	K4me3 K27ac
ENSMUSG00000003123.15	Lipe	chr7	25388477	25392477	Unmarked
ENSMUSG00000003131.7	Pafah1b2	chr9	45982827	45986827	K4me3 K27ac
ENSMUSG00000003134.10	Tbc1d8	chr1	39476755	39480755	K4me3 K27ac
ENSMUSG00000003135.15	Cnot11	chr1	39533801	39537801	K4me3
ENSMUSG00000003153.10	Slc2a3	chr6	122777957	122781957	Repressed
ENSMUSG00000003154.15	Foxj2	chr6	122824674	122828674	K4me1 K27ac
ENSMUSG00000003161.15	Sri	chr5	8057341	8061341	K4me3 K4me1
ENSMUSG00000003166.20	Dgcr2	chr16	17889660	17893660	K4me3 K27ac
ENSMUSG00000003184.15	Irf3	chr7	44996325	45000325	K4me3 K4me1 K27ac
ENSMUSG00000003190.12	Bcl2l12	chr7	44995545	44999545	K4me3 K4me1 K27ac
ENSMUSG00000003198.10	Zfp959	chr17	55890467	55894467	K4me3
ENSMUSG00000003199.16	Mpnd	chr17	56009942	56013942	Unmarked
ENSMUSG00000003200.10	Sh3gl1	chr17	56034576	56038576	K4me3 K4me1 K27ac
ENSMUSG00000003206.7	Ebi3	chr17	55950639	55954639	Unmarked
ENSMUSG00000003208.9	Yju2	chr17	55957173	55961173	K4me3 K27ac
ENSMUSG00000003226.7	Ranbp2	chr10	58445194	58449194	K4me3 K27ac
ENSMUSG00000003228.9	Grk5	chr19	60887748	60891748	K4me3 K27ac
ENSMUSG00000003233.12	Dvl3	chr16	20514981	20518981	K4me3 K27ac
ENSMUSG00000003234.16	Abcf3	chr16	20549660	20553660	K4me1
ENSMUSG00000003235.13	Eif2b5	chr16	20502762	20506762	Unmarked
ENSMUSG00000003269.17	Cyth2	chr7	45812581	45816581	K4me3
ENSMUSG00000003271.17	Sult2b1	chr7	45740746	45744746	Unmarked
ENSMUSG00000003273.14	Car11	chr7	45697842	45701842	Repressed
ENSMUSG00000003279.17	Dlgap1	chr17	69967401	69971401	K4me3
ENSMUSG00000003282.9	Plag1	chr4	3936382	3940382	K4me3 K27ac
ENSMUSG00000003283.14	Hck	chr2	153106467	153110467	Bivalent
ENSMUSG00000003299.10	Mrpl4	chr9	21001383	21005383	K4me3 K27ac
ENSMUSG00000003308.15	Keap1	chr9	21236813	21240813	K4me3 K4me1 K27ac
ENSMUSG00000003309.14	Ap1m2	chr9	21310311	21314311	K4me1
ENSMUSG00000003316.14	Glg1	chr8	111257216	111261216	K4me3 K4me1 K27ac
ENSMUSG00000003344.14	Btbd2	chr10	80654494	80658494	K4me3
ENSMUSG00000003345.16	Csnk1g2	chr10	80627655	80631655	K4me1
ENSMUSG00000003346.14	Abhd17a	chr10	80584624	80588624	K4me1
ENSMUSG00000003348.10	Mob3a	chr10	80699828	80703828	K4me3 K27ac
ENSMUSG00000003352.14	Cacnb3	chr15	98630380	98634380	K4me3
ENSMUSG00000003354.6	Ccdc65	chr15	98706230	98710230	Bivalent
ENSMUSG00000003360.15	Ddx23	chr15	98660881	98664881	K4me3 K27ac
ENSMUSG00000003363.15	Pld3	chr7	27551151	27555151	K4me3 K4me1 K27ac
ENSMUSG00000003378.9	Grik5	chr7	25058994	25062994	Unmarked
ENSMUSG00000003379.7	Cd79a	chr7	24895380	24899380	Unmarked
ENSMUSG00000003380.11	Rabac1	chr7	24970754	24974754	K4me3 K27ac
ENSMUSG00000003382.18	Etv3	chr3	87523606	87527606	Repressed
ENSMUSG00000003402.14	Prkcsh	chr9	22001017	22005017	K4me3 K27ac
ENSMUSG00000003410.8	Elavl3	chr9	22050023	22054023	Repressed
ENSMUSG00000003418.11	St8sia6	chr2	13792064	13796064	Repressed
ENSMUSG00000003420.8	Fcgrt	chr7	45101744	45105744	Unmarked
ENSMUSG00000003421.13	Nosip	chr7	45073710	45077710	Unmarked
ENSMUSG00000003423.15	Pih1d1	chr7	45153986	45157986	K4me3 K27ac
ENSMUSG00000003429.11	Rps11	chr7	45122439	45126439	K4me3 K27ac
ENSMUSG00000003435.9	Supt5	chr7	28329454	28333454	Unmarked
ENSMUSG00000003437.14	Paf1	chr7	28391040	28395040	K4me3 K27ac
ENSMUSG00000003438.17	Timm50	chr7	28306018	28310018	Unmarked
ENSMUSG00000003444.8	Med29	chr7	28390708	28394708	K4me3 K27ac
ENSMUSG00000003452.15	Bicd1	chr6	149511829	149515829	Unmarked
ENSMUSG00000003458.12	Ncstn	chr1	172080795	172084795	K4me3 K27ac
ENSMUSG00000003464.13	Pex19	chr1	172131959	172135959	Unmarked
ENSMUSG00000003469.9	Phyhip	chr14	70455475	70459475	K4me3 K27ac
ENSMUSG00000003476.16	Crhr2	chr6	55130960	55134960	Unmarked
ENSMUSG00000003477.5	Inmt	chr6	55173043	55177043	K4me1
ENSMUSG00000003484.4	Cyp4f18	chr8	71990915	71994915	Unmarked
ENSMUSG00000003500.13	Impdh1	chr6	29214364	29218364	K4me3 K27ac
ENSMUSG00000003518.13	Dusp3	chr11	101982778	101986778	K4me3 K4me1 K27ac
ENSMUSG00000003526.12	Prodh	chr16	18087163	18091163	Unmarked
ENSMUSG00000003527.9	Ess2	chr16	17909348	17913348	Unmarked
ENSMUSG00000003528.15	Slc25a1	chr16	17925416	17929416	K4me3 K27ac
ENSMUSG00000003531.15	Dgcr6	chr16	18050891	18054891	Unmarked
ENSMUSG00000003541.6	Ier3	chr17	35819683	35823683	K4me3 K27ac
ENSMUSG00000003545.3	Fosb	chr7	19308051	19312051	K4me3 K27ac
ENSMUSG00000003546.10	Klc4	chr17	46643144	46647144	K4me3 K27ac
ENSMUSG00000003549.9	Ercc1	chr7	19343106	19347106	K4me3 K27ac
ENSMUSG00000003573.15	Homer3	chr8	70280826	70284826	Unmarked
ENSMUSG00000003575.13	Crtc1	chr8	70437575	70441575	K4me3 K27ac
ENSMUSG00000003581.14	Rnf215	chr11	4133501	4137501	K4me3 K27ac
ENSMUSG00000003585.13	Sec14l2	chr11	4116753	4120753	Bivalent
ENSMUSG00000003604.14	Aven	chr2	112557281	112561281	Unmarked
ENSMUSG00000003617.16	Cp	chr3	19968884	19972884	Unmarked
ENSMUSG00000003623.4	Crot	chr5	8995324	8999324	K4me3 K27ac
ENSMUSG00000003644.17	Rps6ka1	chr4	133885784	133889784	K4me3 K4me1
ENSMUSG00000003660.10	Snrnp200	chr2	127206385	127210385	K4me3 K27ac
ENSMUSG00000003662.10	Ciao1	chr2	127244046	127248046	K4me3 K27ac
ENSMUSG00000003665.7	Has1	chr17	17853188	17857188	K4me1
ENSMUSG00000003680.16	Taf6l	chr19	8784257	8788257	K4me3 K4me1
ENSMUSG00000003721.14	Insig2	chr1	121325793	121329793	K4me3 K27ac
ENSMUSG00000003731.13	Kpna6	chr4	129670767	129674767	K4me3 K27ac
ENSMUSG00000003746.16	Man1a	chr10	54073736	54077736	Bivalent
ENSMUSG00000003752.9	Itpkc	chr7	27212454	27216454	Unmarked
ENSMUSG00000003762.13	Coq8b	chr7	27248384	27252384	Unmarked
ENSMUSG00000003778.14	Brd8	chr18	34622601	34626601	K4me3 K27ac
ENSMUSG00000003779.16	Kif20a	chr18	34622612	34626612	K4me3 K27ac
ENSMUSG00000003808.18	Farsa	chr8	84865562	84869562	Unmarked
ENSMUSG00000003809.14	Gcdh	chr8	84890666	84894666	K4me3
ENSMUSG00000003810.13	Mast2	chr4	116308648	116312648	Unmarked
ENSMUSG00000003812.13	Dnase2a	chr8	84906720	84910720	K4me3 K4me1
ENSMUSG00000003813.15	Rad23a	chr8	84838665	84842665	K4me3 K27ac
ENSMUSG00000003814.8	Calr	chr8	84844830	84848830	K4me3 K27ac
ENSMUSG00000003824.12	Syce2	chr8	84870437	84874437	K4me3
ENSMUSG00000003847.16	Nfat5	chr8	107291508	107295508	K4me3 K4me1 K27ac
ENSMUSG00000003848.14	Nob1	chr8	107423049	107427049	K4me3 K4me1
ENSMUSG00000003849.8	Nqo1	chr8	107401206	107405206	K4me3 K4me1
ENSMUSG00000003863.18	Ppfia3	chr7	45358113	45362113	Unmarked
ENSMUSG00000003868.14	Ruvbl2	chr7	45429373	45433373	Unmarked
ENSMUSG00000003872.9	Lin7b	chr7	45368185	45372185	K4me3 K4me1
ENSMUSG00000003873.11	Bax	chr7	45464775	45468775	K4me3 K27ac
ENSMUSG00000003923.14	Tfam	chr10	71235042	71239042	K4me3 K27ac
ENSMUSG00000003929.11	Zfp81	chr17	33356868	33360868	K4me3
ENSMUSG00000003934.5	Efnb3	chr11	69558205	69562205	Unmarked
ENSMUSG00000003948.17	Mmd	chr11	90247475	90251475	K4me3 K27ac
ENSMUSG00000003949.16	Hlf	chr11	90386207	90390207	K4me3
ENSMUSG00000003955.8	Fam162a	chr16	36050394	36054394	Unmarked
ENSMUSG00000003970.9	Rpl8	chr15	76902302	76906302	K4me3 K4me1 K27ac
ENSMUSG00000003992.15	Ssbp2	chr13	91459169	91463169	K4me3
ENSMUSG00000004018.9	Fancl	chr11	26385201	26389201	K4me3 K27ac
ENSMUSG00000004031.13	Brinp2	chr1	158354229	158358229	Repressed
ENSMUSG00000004032.10	Gstm5	chr3	107893953	107897953	Bivalent
ENSMUSG00000004040.16	Stat3	chr11	100906224	100910224	K4me1 K27ac
ENSMUSG00000004043.14	Stat5a	chr11	100877018	100881018	Unmarked
ENSMUSG00000004044.9	Cavin1	chr11	100968551	100972551	K4me3
ENSMUSG00000004054.9	Map3k11	chr19	5686741	5690741	K4me3 K27ac
ENSMUSG00000004056.15	Akt2	chr7	27589745	27593745	K4me3 K4me1 K27ac
ENSMUSG00000004069.17	Dnaja3	chr16	4682069	4686069	K4me3 K27ac
ENSMUSG00000004070.15	Hmox2	chr16	4754993	4758993	K4me1 K27ac
ENSMUSG00000004071.13	Cdip1	chr16	4787930	4791930	K4me3 K27ac
ENSMUSG00000004085.14	Map3k20	chr2	72295900	72299900	K4me3
ENSMUSG00000004096.9	Cwc15	chr9	14498885	14502885	K4me3 K27ac
ENSMUSG00000004098.7	Col5a3	chr9	20813067	20817067	Repressed
ENSMUSG00000004099.16	Dnmt1	chr9	20906979	20910979	Unmarked
ENSMUSG00000004100.12	Ppan	chr9	20886264	20890264	K4me3 K27ac
ENSMUSG00000004110.17	Cacna1e	chr1	154724356	154728356	Repressed
ENSMUSG00000004113.18	Cacna1b	chr2	24761152	24765152	K4me3
ENSMUSG00000004127.12	Trmt10a	chr3	138141909	138145909	K4me3 K4me1 K27ac
ENSMUSG00000004187.11	Kifc2	chr15	76658698	76662698	K4me3 K27ac
ENSMUSG00000004207.14	Psap	chr10	60275626	60279626	K4me3 K4me1 K27ac
ENSMUSG00000004233.14	Wars2	chr3	99139071	99143071	Repressed
ENSMUSG00000004263.15	Atn1	chr6	124754524	124758524	K4me3 K4me1
ENSMUSG00000004264.17	Phb2	chr6	124710335	124714335	K4me3 K27ac
ENSMUSG00000004266.15	Ptpn6	chr6	124731110	124735110	Unmarked
ENSMUSG00000004268.11	Emg1	chr6	124710069	124714069	K4me3 K27ac
ENSMUSG00000004270.13	Lpcat3	chr6	124661171	124665171	K4me3 K4me1 K27ac
ENSMUSG00000004285.12	Atp6v1f	chr6	29465717	29469717	K4me3 K27ac
ENSMUSG00000004319.15	Clcn3	chr8	60952779	60956779	K4me3 K4me1 K27ac
ENSMUSG00000004328.15	Hif3a	chr7	17060384	17064384	K4me1
ENSMUSG00000004356.8	Utp20	chr10	88763672	88767672	Unmarked
ENSMUSG00000004359.16	Spic	chr10	88681023	88685023	Unmarked
ENSMUSG00000004360.9	9330159F19Rik	chr10	29209605	29213605	Unmarked
ENSMUSG00000004364.14	Cul3	chr1	80338311	80342311	K4me3 K4me1 K27ac
ENSMUSG00000004371.15	Il11	chr7	4776141	4780141	Repressed
ENSMUSG00000004383.18	Large1	chr8	73096913	73100913	K4me1
ENSMUSG00000004393.10	Ddx56	chr11	6265746	6269746	K4me3 K27ac
ENSMUSG00000004394.12	Tmed4	chr11	6272865	6276865	K4me3 K27ac
ENSMUSG00000004415.15	Col26a1	chr5	136742549	136746549	Unmarked
ENSMUSG00000004446.12	Bid	chr6	120914798	120918798	K4me3
ENSMUSG00000004451.14	Ralb	chr1	119502794	119506794	K4me3 K27ac
ENSMUSG00000004455.16	Ppp1cc	chr5	122170731	122174731	Unmarked
ENSMUSG00000004460.17	Dnajb11	chr16	22867426	22871426	Unmarked
ENSMUSG00000004462.7	Tbccd1	chr16	22842643	22846643	K4me1
ENSMUSG00000004473.10	Clec11a	chr7	44304902	44308902	K4me3
ENSMUSG00000004500.9	Zfp324	chr7	12963844	12967844	K4me3 K27ac
ENSMUSG00000004508.6	Gab2	chr7	97079775	97083775	K4me3 K27ac
ENSMUSG00000004530.12	Coro1c	chr5	113906758	113910758	K4me3 K27ac
ENSMUSG00000004535.12	Tax1bp1	chr6	52712349	52716349	K4me3 K27ac
ENSMUSG00000004558.15	Ndrg2	chr14	51910845	51914845	Repressed
ENSMUSG00000004561.14	Mettl17	chr14	51882953	51886953	K4me3
ENSMUSG00000004562.16	Arhgef40	chr14	51982911	51986911	Bivalent
ENSMUSG00000004565.15	Pnpla6	chr8	3513383	3517383	K4me3 K27ac
ENSMUSG00000004567.16	Mcoln1	chr8	3503778	3507778	Unmarked
ENSMUSG00000004568.13	Arhgef18	chr8	3424699	3428699	K4me1
ENSMUSG00000004591.16	Pkn2	chr3	142879915	142883915	K4me3 K27ac
ENSMUSG00000004609.11	Cd33	chr7	43530678	43534678	Repressed
ENSMUSG00000004610.4	Etfb	chr7	43442082	43446082	K4me3
ENSMUSG00000004626.14	Stxbp2	chr8	3637573	3641573	Unmarked
ENSMUSG00000004631.15	Sgce	chr6	4745157	4749157	K4me3 K4me1
ENSMUSG00000004633.17	Chn2	chr6	54270907	54274907	Repressed
ENSMUSG00000004637.15	Wwox	chr8	114606435	114610435	Unmarked
ENSMUSG00000004642.13	Slbp	chr5	33640162	33644162	Unmarked
ENSMUSG00000004655.5	Aqp1	chr6	55334431	55338431	Unmarked
ENSMUSG00000004661.15	Arid3b	chr9	57832236	57836236	K4me3 K4me1
ENSMUSG00000004667.18	Polr2e	chr10	80037795	80041795	K4me3
ENSMUSG00000004677.17	Myo9b	chr8	71331816	71335816	Unmarked
ENSMUSG00000004730.15	Adgre1	chr17	57356698	57360698	Repressed
ENSMUSG00000004748.5	Mtfp1	chr11	4093140	4097140	K4me3 K4me1 K27ac
ENSMUSG00000004768.14	Rab23	chr1	33732527	33736527	Unmarked
ENSMUSG00000004771.12	Rab11a	chr9	64735742	64739742	K4me3 K27ac
ENSMUSG00000004788.11	Eif2b2	chr12	85217545	85221545	K4me3 K4me1 K27ac
ENSMUSG00000004789.10	Dlst	chr12	85126081	85130081	K4me1
ENSMUSG00000004798.14	Ulk2	chr11	61852502	61856502	K4me3 K27ac
ENSMUSG00000004815.12	Dgkq	chr5	108651648	108655648	Unmarked
ENSMUSG00000004821.1	Tmed11	chr5	108793363	108797363	Repressed
ENSMUSG00000004837.2	Grap	chr11	61667045	61671045	Unmarked
ENSMUSG00000004843.7	Chmp2b	chr16	65560726	65564726	K4me3 K27ac
ENSMUSG00000004846.10	Plod3	chr5	136989623	136993623	Unmarked
ENSMUSG00000004849.14	Ap1s1	chr5	137035650	137039650	Unmarked
ENSMUSG00000004865.16	Srpk1	chr17	28620451	28624451	K4me3 K27ac
ENSMUSG00000004880.11	Lbr	chr1	181818542	181822542	Unmarked
ENSMUSG00000004891.16	Nes	chr3	87969077	87973077	Repressed
ENSMUSG00000004895.9	Prcc	chr3	87883608	87887608	K4me3 K27ac
ENSMUSG00000004896.16	Rrnad1	chr3	87928138	87932138	K4me3 K4me1 K27ac
ENSMUSG00000004897.16	Hdgf	chr3	87908033	87912033	K4me3 K4me1 K27ac
ENSMUSG00000004902.7	Slc25a18	chr6	120771577	120775577	K4me1 K27ac
ENSMUSG00000004929.12	Thop1	chr10	81068158	81072158	Unmarked
ENSMUSG00000004931.11	Apba3	chr10	81270746	81274746	Unmarked
ENSMUSG00000004933.17	Matk	chr10	81255298	81259298	Unmarked
ENSMUSG00000004934.14	Pias4	chr10	81156011	81160011	Unmarked
ENSMUSG00000004936.8	Map2k1	chr9	64251631	64255631	K4me3 K27ac
ENSMUSG00000004937.6	Sgta	chr10	81058144	81062144	K4me3
ENSMUSG00000004945.15	Tmem242	chr17	5438256	5442256	K4me3 K27ac
ENSMUSG00000004947.15	Dtx2	chr5	135992881	135996881	K4me3 K4me1 K27ac
ENSMUSG00000004951.10	Hspb1	chr5	135886017	135890017	K4me3 K4me1
ENSMUSG00000004952.13	Rasa4	chr5	136082031	136086031	K4me3
ENSMUSG00000004961.7	Syt5	chr7	4544567	4548567	K4me3 K27ac
ENSMUSG00000004980.16	Hnrnpa2b1	chr6	51467845	51471845	K4me3 K27ac
ENSMUSG00000004994.12	Ccdc130	chr8	84260145	84264145	Unmarked
ENSMUSG00000004996.9	Mri1	chr8	84255324	84259324	K4me3 K27ac
ENSMUSG00000005034.15	Prkacb	chr3	146768261	146772261	K4me3 K4me1 K27ac
ENSMUSG00000005043.13	Sgsh	chr11	119353536	119357536	K4me3
ENSMUSG00000005045.16	Chd5	chr4	152370141	152374141	Unmarked
ENSMUSG00000005054.7	Cstb	chr10	78423668	78427668	K4me3 K27ac
ENSMUSG00000005057.13	Sh2b2	chr5	136242854	136246854	K4me3
ENSMUSG00000005069.12	Pex5	chr6	124413067	124417067	K4me3 K27ac
ENSMUSG00000005078.16	Jkamp	chr12	72083788	72087788	K4me3 K27ac
ENSMUSG00000005102.13	Eif2ak4	chr2	118386846	118390846	K4me3 K27ac
ENSMUSG00000005103.12	Wdr1	chr5	38559806	38563806	K4me3 K27ac
ENSMUSG00000005107.13	Slc2a9	chr5	38500152	38504152	Unmarked
ENSMUSG00000005124.10	Ccn4	chr15	66907263	66911263	K4me1
ENSMUSG00000005125.13	Ndrg1	chr15	66967640	66971640	K4me3 K27ac
ENSMUSG00000005131.4	4930550C14Rik	chr9	53403285	53407285	K4me3 K4me1 K27ac
ENSMUSG00000005142.10	Man2b1	chr8	85081303	85085303	K4me3 K4me1
ENSMUSG00000005150.16	Wdr83	chr8	85074291	85078291	Unmarked
ENSMUSG00000005161.15	Prdx2	chr8	84967693	84971693	K4me3 K27ac
ENSMUSG00000005198.15	Polr2a	chr11	69740571	69744571	Unmarked
ENSMUSG00000005204.12	Senp3	chr11	69676013	69680013	Unmarked
ENSMUSG00000005220.10	Corin	chr5	72378288	72382288	Unmarked
ENSMUSG00000005225.15	Plekha8	chr6	54601146	54605146	K4me1
ENSMUSG00000005232.11	G6pc2	chr2	69209072	69213072	K4me1
ENSMUSG00000005233.16	Spc25	chr2	69204123	69208123	K4me3 K4me1 K27ac
ENSMUSG00000005237.14	Dnah2	chr11	69514755	69518755	Unmarked
ENSMUSG00000005251.15	Ripk4	chr16	97761787	97765787	K4me3 K27ac
ENSMUSG00000005262.13	Ufd1	chr16	18810293	18814293	K4me3 K27ac
ENSMUSG00000005267.13	Zfp287	chr11	62726671	62730671	Unmarked
ENSMUSG00000005268.20	Prlr	chr15	10221985	10225985	K4me3 K4me1 K27ac
ENSMUSG00000005299.6	Letm1	chr5	33780817	33784817	K4me3 K4me1
ENSMUSG00000005312.15	Ubqln1	chr13	58213653	58217653	K4me3 K27ac
ENSMUSG00000005320.9	Fgfr4	chr13	55150639	55154639	K4me3
ENSMUSG00000005338.13	Cadm3	chr1	173365633	173369633	Repressed
ENSMUSG00000005354.16	Txn2	chr15	77926974	77930974	K4me3 K27ac
ENSMUSG00000005362.14	Crbn	chr6	106798077	106802077	K4me3 K27ac
ENSMUSG00000005370.4	Msh6	chr17	87977702	87981702	K4me1
ENSMUSG00000005371.15	Fbxo11	chr17	88063243	88067243	K4me3 K27ac
ENSMUSG00000005374.13	Tbl2	chr5	135147690	135151690	K4me3
ENSMUSG00000005378.17	Bud23	chr5	135061764	135065764	K4me3
ENSMUSG00000005397.8	Nid1	chr13	13435666	13439666	Unmarked
ENSMUSG00000005410.6	Mcm5	chr8	75107568	75111568	K4me3
ENSMUSG00000005413.8	Hmox1	chr8	75091620	75095620	K4me3
ENSMUSG00000005417.17	Mprip	chr11	59758747	59762747	K4me1 K27ac
ENSMUSG00000005442.13	Cic	chr7	25281216	25285216	K4me3 K4me1 K27ac
ENSMUSG00000005447.12	Pafah1b3	chr7	25295986	25299986	K4me3 K27ac
ENSMUSG00000005465.9	Il27ra	chr8	84040540	84044540	Repressed
ENSMUSG00000005469.10	Prkaca	chr8	83974882	83978882	K4me1 K27ac
ENSMUSG00000005470.8	Asf1b	chr8	83953506	83957506	K4me3
ENSMUSG00000005481.18	Ddx39	chr8	83713176	83717176	K4me3
ENSMUSG00000005483.10	Dnajb1	chr8	83606192	83610192	K4me3 K27ac
ENSMUSG00000005501.14	Usp40	chr1	88006528	88010528	K4me3 K27ac
ENSMUSG00000005505.12	Kbtbd4	chr2	90903074	90907074	K4me3 K27ac
ENSMUSG00000005506.16	Celf1	chr2	90938457	90942457	K4me3 K27ac
ENSMUSG00000005510.9	Ndufs3	chr2	90902827	90906827	K4me3 K27ac
ENSMUSG00000005533.10	Igf1r	chr7	68146589	68150589	K4me1
ENSMUSG00000005534.10	Insr	chr8	3277551	3281551	K4me3 K27ac
ENSMUSG00000005553.14	Atp4a	chr7	30720387	30724387	K4me1 K27ac
ENSMUSG00000005566.14	Trim28	chr7	13027703	13031703	Unmarked
ENSMUSG00000005575.16	Ube2m	chr7	13036275	13040275	K4me3 K27ac
ENSMUSG00000005580.11	Adcy9	chr16	4417808	4421808	K4me3 K27ac
ENSMUSG00000005583.16	Mef2c	chr13	83502239	83506239	Unmarked
ENSMUSG00000005609.16	Ctr9	chr7	111026994	111030994	K4me3 K27ac
ENSMUSG00000005610.17	Eif4g2	chr7	111072699	111076699	Unmarked
ENSMUSG00000005611.15	Mrvi1	chr7	110924403	110928403	Unmarked
ENSMUSG00000005615.15	Pcyt1a	chr16	32429248	32433248	K4me3 K4me1
ENSMUSG00000005621.11	Zfp592	chr7	81035738	81039738	Unmarked
ENSMUSG00000005625.15	Psmd4	chr3	95040548	95044548	K4me3 K27ac
ENSMUSG00000005640.11	Insrr	chr3	87795093	87799093	K4me3 K27ac
ENSMUSG00000005656.9	Snx6	chr12	54793652	54797652	K4me3 K4me1
ENSMUSG00000005667.8	Mthfd2	chr6	83308548	83312548	Unmarked
ENSMUSG00000005672.12	Kit	chr5	75572915	75576915	K4me3
ENSMUSG00000005682.9	Pan2	chr10	128301373	128305373	K4me3 K4me1 K27ac
ENSMUSG00000005683.8	Cs	chr10	128335809	128339809	K4me3 K27ac
ENSMUSG00000005686.17	Ampd3	chr7	110766342	110770342	Bivalent
ENSMUSG00000005687.14	Bcas2	chr3	103169748	103173748	K4me3 K27ac
ENSMUSG00000005698.15	Ctcf	chr8	105634578	105638578	K4me3 K27ac
ENSMUSG00000005699.16	Pard6a	chr8	105699646	105703646	K4me3 K27ac
ENSMUSG00000005718.8	Tfap4	chr16	4556783	4560783	K4me3 K27ac
ENSMUSG00000005732.14	Ranbp1	chr16	18246646	18250646	K4me3 K27ac
ENSMUSG00000005763.15	Cd247	chr1	165862654	165866654	K4me1
ENSMUSG00000005774.12	Rfx5	chr3	94952200	94956200	K4me3 K4me1 K27ac
ENSMUSG00000005779.12	Psmb4	chr3	94882843	94886843	K4me3 K27ac
ENSMUSG00000005802.12	Slc30a4	chr2	122700663	122704663	K4me3 K27ac
ENSMUSG00000005803.14	Sqor	chr2	122779998	122783998	K4me1 K27ac
ENSMUSG00000005804.14	Bloc1s6	chr2	122736526	122740526	K4me3 K27ac
ENSMUSG00000005813.12	Metap1	chr3	138479784	138483784	K4me1 K27ac
ENSMUSG00000005823.9	Gpr108	chr17	57245689	57249689	Bivalent
ENSMUSG00000005836.10	Gata6	chr18	11050469	11054469	K4me3 K27ac
ENSMUSG00000005846.12	Rsl1d1	chr16	11201331	11205331	K4me3 K27ac
ENSMUSG00000005871.15	Apc	chr18	34219251	34223251	K4me3 K27ac
ENSMUSG00000005873.6	Reep5	chr18	34370498	34374498	K4me3 K27ac
ENSMUSG00000005881.13	Ergic3	chr2	156006044	156010044	K4me3 K4me1
ENSMUSG00000005882.18	Uqcc1	chr2	155849692	155853692	Unmarked
ENSMUSG00000005886.14	Ncoa2	chr1	13372083	13376083	K4me3 K27ac
ENSMUSG00000005893.14	Nr2c2	chr6	92143726	92147726	K4me1
ENSMUSG00000005897.14	Nr2c1	chr10	94146418	94150418	K4me3 K4me1 K27ac
ENSMUSG00000005899.14	Smpd4	chr16	17617359	17621359	K4me3
ENSMUSG00000005907.14	Pex1	chr5	3633170	3637170	Unmarked
ENSMUSG00000005936.19	Kctd20	chr17	28950257	28954257	K4me3 K27ac
ENSMUSG00000005949.9	Ctns	chr11	73196995	73200995	K4me3 K27ac
ENSMUSG00000005951.13	Shpk	chr11	73197459	73201459	K4me3 K27ac
ENSMUSG00000005958.15	Ephb3	chr16	21214816	21218816	Unmarked
ENSMUSG00000005968.14	Tuft1	chr3	94656803	94660803	K4me3
ENSMUSG00000005973.6	Rcn1	chr2	105393348	105397348	Unmarked
ENSMUSG00000005981.11	Trap1	chr16	4075827	4079827	K4me3 K27ac
ENSMUSG00000005982.14	Naa60	chr16	3870374	3874374	K4me3 K27ac
ENSMUSG00000005983.15	1700037C18Rik	chr16	3906623	3910623	K4me3 K27ac
ENSMUSG00000005986.16	Ankrd13d	chr19	4281135	4285135	K4me3
ENSMUSG00000006005.18	Tpr	chr1	150409996	150413996	Unmarked
ENSMUSG00000006010.14	Odr4	chr1	150390747	150394747	K4me3 K27ac
ENSMUSG00000006019.15	Dhx34	chr7	16211185	16215185	Unmarked
ENSMUSG00000006021.5	Kptn	chr7	16117894	16121894	K4me3 K27ac
ENSMUSG00000006024.13	Napa	chr7	16096457	16100457	K4me3 K27ac
ENSMUSG00000006050.12	Sra1	chr18	36668608	36672608	K4me3 K4me1 K27ac
ENSMUSG00000006057.15	Atp5g1	chr11	96073619	96077619	K4me3 K27ac
ENSMUSG00000006058.10	Snf8	chr11	96032950	96036950	K4me3
ENSMUSG00000006095.12	Tbcb	chr7	30225061	30229061	Unmarked
ENSMUSG00000006127.9	Inpp5k	chr11	75629028	75633028	K4me3 K27ac
ENSMUSG00000006134.4	Crkl	chr16	17449986	17453986	K4me3 K27ac
ENSMUSG00000006154.13	Eps8l1	chr7	4458701	4462701	Unmarked
ENSMUSG00000006169.20	Clint1	chr11	45849963	45853963	K4me3 K4me1 K27ac
ENSMUSG00000006191.17	Cdkal1	chr13	29853647	29857647	K4me3 K4me1
ENSMUSG00000006204.7	Cdcp3	chr7	131172420	131176420	Repressed
ENSMUSG00000006205.13	Htra1	chr7	130979669	130983669	Repressed
ENSMUSG00000006215.12	Zbtb17	chr4	141442653	141446653	K4me3 K4me1
ENSMUSG00000006219.12	Fblim1	chr4	141596224	141600224	Bivalent
ENSMUSG00000006221.7	Hspb7	chr4	141418778	141422778	Bivalent
ENSMUSG00000006241.16	Ccdc159	chr9	21925611	21929611	K4me3 K27ac
ENSMUSG00000006262.15	Mob1b	chr5	88718976	88722976	K4me3 K27ac
ENSMUSG00000006273.14	Atp6v1b2	chr8	69100212	69104212	Unmarked
ENSMUSG00000006276.10	Eps15l1	chr8	72419455	72423455	K4me3 K27ac
ENSMUSG00000006281.8	Tep1	chr14	50822889	50826889	Unmarked
ENSMUSG00000006288.8	Ttc5	chr14	50783493	50787493	Bivalent
ENSMUSG00000006289.14	Osgep	chr14	50922688	50926688	K4me3 K27ac
ENSMUSG00000006299.13	Aamp	chr1	74282738	74286738	K4me3
ENSMUSG00000006301.17	Tmbim1	chr1	74302120	74306120	K4me3 K27ac
ENSMUSG00000006304.14	Arpc2	chr1	74234516	74238516	K4me3 K4me1 K27ac
ENSMUSG00000006307.16	Kmt2b	chr7	30568664	30572664	Unmarked
ENSMUSG00000006315.9	Tmem147	chr7	30727426	30731426	K4me3 K4me1 K27ac
ENSMUSG00000006333.14	Rps9	chr7	3701992	3705992	K4me3 K27ac
ENSMUSG00000006335.16	Tfpt	chr7	3627859	3631859	K4me3 K27ac
ENSMUSG00000006342.15	Susd2	chr10	75641980	75645980	K4me1
ENSMUSG00000006344.17	Ggt5	chr10	75587380	75591380	Bivalent
ENSMUSG00000006345.10	Ggt1	chr10	75566661	75570661	Unmarked
ENSMUSG00000006356.10	Crip2	chr12	113138235	113142235	K4me3
ENSMUSG00000006360.11	Crip1	chr12	113150080	113154080	K4me3
ENSMUSG00000006362.16	Cbfa2t3	chr8	122676111	122680111	K4me3 K27ac
ENSMUSG00000006369.14	Fbln1	chr15	85261453	85265453	Bivalent
ENSMUSG00000006386.15	Tek	chr4	94737299	94741299	Bivalent
ENSMUSG00000006390.15	Elovl1	chr4	118426173	118430173	K4me3 K27ac
ENSMUSG00000006392.16	Med8	chr4	118409436	118413436	K4me1
ENSMUSG00000006395.16	Hyi	chr4	118357989	118361989	K4me3 K27ac
ENSMUSG00000006398.15	Cdc20	chr4	118433821	118437821	Unmarked
ENSMUSG00000006403.13	Adamts4	chr1	171248422	171252422	Unmarked
ENSMUSG00000006412.10	Pfdn2	chr1	171354389	171358389	Unmarked
ENSMUSG00000006418.17	Rnf114	chr2	167501445	167505445	K4me3 K4me1 K27ac
ENSMUSG00000006435.16	Neurl1a	chr19	47177150	47181150	K4me3
ENSMUSG00000006442.10	Srm	chr4	148589917	148593917	K4me3 K27ac
ENSMUSG00000006456.10	Rbm14	chr19	4809634	4813634	K4me3 K27ac
ENSMUSG00000006457.4	Actn3	chr19	4875909	4879909	K4me3 K4me1
ENSMUSG00000006463.13	Zdhhc24	chr19	4876689	4880689	K4me3 K4me1
ENSMUSG00000006464.9	Bbs1	chr19	4904627	4908627	Unmarked
ENSMUSG00000006471.18	Ndor1	chr2	25253346	25257346	K4me3 K27ac
ENSMUSG00000006494.11	Pdk1	chr2	71871742	71875742	K4me3
ENSMUSG00000006498.16	Ptbp1	chr10	79852666	79856666	K4me3 K4me1 K27ac
ENSMUSG00000006517.5	Mvd	chr8	122441396	122445396	K4me3 K27ac
ENSMUSG00000006519.11	Cyba	chr8	122430905	122434905	Unmarked
ENSMUSG00000006526.13	Stimate	chr14	30870354	30874354	Unmarked
ENSMUSG00000006546.3	Cryba2	chr1	74890892	74894892	K4me3 K4me1 K27ac
ENSMUSG00000006567.11	Atp7b	chr8	22058019	22062019	K4me3 K27ac
ENSMUSG00000006575.14	Rundc3a	chr11	102397857	102401857	K4me1
ENSMUSG00000006585.3	Cdt1	chr8	122566025	122570025	K4me3 K27ac
ENSMUSG00000006586.15	Runx1t1	chr4	13749296	13753296	K4me3 K4me1 K27ac
ENSMUSG00000006589.8	Aprt	chr8	122574890	122578890	K4me3
ENSMUSG00000006599.13	Gtf2h1	chr7	46794102	46798102	K4me3 K27ac
ENSMUSG00000006611.15	Hfe	chr13	23708854	23712854	K4me3 K27ac
ENSMUSG00000006638.15	Abhd1	chr5	30948105	30952105	K4me3 K27ac
ENSMUSG00000006641.12	Slc5a6	chr5	31040605	31044605	Unmarked
ENSMUSG00000006649.17	Nphs1	chr7	30457724	30461724	Bivalent
ENSMUSG00000006651.8	Aplp1	chr7	30443489	30447489	K4me3
ENSMUSG00000006673.14	Qrich1	chr9	108515102	108519102	K4me3 K27ac
ENSMUSG00000006675.10	P4htm	chr9	108580936	108584936	Unmarked
ENSMUSG00000006676.16	Usp19	chr9	108492629	108496629	Unmarked
ENSMUSG00000006699.17	Cdc42	chr4	137355720	137359720	K4me3 K27ac
ENSMUSG00000006705.13	Pknox1	chr17	31589722	31593722	Unmarked
ENSMUSG00000006711.15	D130043K22Rik	chr13	24843134	24847134	K4me3
ENSMUSG00000006715.11	Gmnn	chr13	24759897	24763897	K4me3 K4me1
ENSMUSG00000006717.7	Acot13	chr13	24829540	24833540	K4me3 K27ac
ENSMUSG00000006720.16	Zfp184	chr13	21943111	21947111	K4me3 K27ac
ENSMUSG00000006724.12	Cyp27b1	chr10	127046670	127050670	K4me1
ENSMUSG00000006728.12	Cdk4	chr10	127064075	127068075	Unmarked
ENSMUSG00000006731.10	B4galnt1	chr10	127163830	127167830	Repressed
ENSMUSG00000006732.14	Mettl1	chr10	127039982	127043982	K4me3 K4me1 K27ac
ENSMUSG00000006736.9	Tspan31	chr10	127068261	127072261	K4me3 K27ac
ENSMUSG00000006740.14	Kif5b	chr18	6239523	6243523	K4me3 K4me1 K27ac
ENSMUSG00000006763.14	Saal1	chr7	46706917	46710917	K4me3
ENSMUSG00000006764.8	Tph2	chr10	115183022	115187022	K4me1
ENSMUSG00000006777.7	Krt23	chr11	99491137	99495137	Repressed
ENSMUSG00000006782.16	Cnp	chr11	100572903	100576903	Unmarked
ENSMUSG00000006784.14	Ttc25	chr11	100547546	100551546	Unmarked
ENSMUSG00000006800.14	Sulf2	chr2	166076119	166080119	Unmarked
ENSMUSG00000006818.5	Sod2	chr17	13004845	13008845	K4me3 K27ac
ENSMUSG00000006850.8	Tmco6	chr18	36733067	36737067	K4me3 K4me1 K27ac
ENSMUSG00000006906.10	Stambp	chr6	83570729	83574729	K4me3 K27ac
ENSMUSG00000006920.14	Ezh1	chr11	101201305	101205305	Unmarked
ENSMUSG00000006930.15	Hap1	chr11	100352040	100356040	K4me3 K27ac
ENSMUSG00000006931.15	P3h4	chr11	100412836	100416836	K4me3
ENSMUSG00000006932.17	Ctnnb1	chr9	120953456	120957456	Unmarked
ENSMUSG00000006941.5	Eif1b	chr9	120490490	120494490	K4me3 K27ac
ENSMUSG00000006958.14	Chrd	chr16	20731128	20735128	K4me3
ENSMUSG00000006998.16	Psmd2	chr16	20657006	20661006	Unmarked
ENSMUSG00000007021.5	Syngr3	chr17	24687955	24691955	Repressed
ENSMUSG00000007029.16	Vars	chr17	35011835	35015835	Unmarked
ENSMUSG00000007030.8	Vwa7	chr17	35014637	35018637	Unmarked
ENSMUSG00000007034.15	Slc44a4	chr17	34912469	34916469	K4me1
ENSMUSG00000007035.15	Msh5	chr17	35044622	35048622	K4me3 K4me1 K27ac
ENSMUSG00000007036.15	Abhd16a	chr17	35087869	35091869	K4me3 K27ac
ENSMUSG00000007038.5	Neu1	chr17	34929252	34933252	K4me3 K27ac
ENSMUSG00000007039.12	Ddah2	chr17	35057815	35061815	K4me3
ENSMUSG00000007041.9	Clic1	chr17	35050449	35054449	K4me3 K27ac
ENSMUSG00000007050.17	Lsm2	chr17	34979879	34983879	K4me3 K4me1 K27ac
ENSMUSG00000007080.14	Pole	chr5	110284340	110288340	K4me3 K4me1
ENSMUSG00000007097.14	Atp1a2	chr1	172296064	172300064	Repressed
ENSMUSG00000007207.10	Stx1a	chr5	135035510	135039510	Unmarked
ENSMUSG00000007216.6	Zfp775	chr6	48600062	48604062	K4me3 K27ac
ENSMUSG00000007338.10	Mrpl49	chr19	6055785	6059785	K4me3 K27ac
ENSMUSG00000007379.15	Dennd2c	chr3	103125555	103129555	Unmarked
ENSMUSG00000007411.16	Mark3	chr12	111586149	111590149	K4me1
ENSMUSG00000007415.15	Gatad1	chr5	3645934	3649934	K4me3 K4me1
ENSMUSG00000007440.10	Pcdha11	chr18	37003202	37007202	Repressed
ENSMUSG00000007458.14	M6pr	chr6	122306719	122310719	K4me3 K4me1 K27ac
ENSMUSG00000007476.18	Lrrc8a	chr2	30235721	30239721	K4me3 K27ac
ENSMUSG00000007564.15	Ppp2r1a	chr17	20954576	20958576	Unmarked
ENSMUSG00000007570.16	Fance	chr17	28311518	28315518	K4me3
ENSMUSG00000007589.9	Tinf2	chr14	55679804	55683804	K4me3 K27ac
ENSMUSG00000007591.15	Tssk4	chr14	55648183	55652183	Unmarked
ENSMUSG00000007603.9	Dus3l	chr17	56762756	56766756	K4me3 K27ac
ENSMUSG00000007610.15	Gtpbp3	chr8	71486102	71490102	K4me3 K27ac
ENSMUSG00000007613.15	Tgfbr1	chr4	47351306	47355306	K4me3 K4me1
ENSMUSG00000007617.18	Homer1	chr13	93303183	93307183	K4me3 K27ac
ENSMUSG00000007646.13	Rad51c	chr11	87402423	87406423	K4me3 K27ac
ENSMUSG00000007655.16	Cav1	chr6	17304410	17308410	Bivalent
ENSMUSG00000007656.13	Arpp19	chr9	75035676	75039676	K4me3 K27ac
ENSMUSG00000007659.18	Bcl2l1	chr2	152828666	152832666	K4me3 K4me1 K27ac
ENSMUSG00000007670.10	Khsrp	chr17	57022171	57026171	Unmarked
ENSMUSG00000007721.6	Ccdc124	chr8	70871935	70875935	K4me3
ENSMUSG00000007739.10	Cct4	chr11	22999933	23003933	Unmarked
ENSMUSG00000007777.9	0610009B22Rik	chr11	51686653	51690653	K4me3 K27ac
ENSMUSG00000007812.16	Zfp655	chr5	145229728	145233728	K4me3 K27ac
ENSMUSG00000007815.13	Rhoa	chr9	108304828	108308828	K4me3 K4me1 K27ac
ENSMUSG00000007817.15	Zmiz1	chr14	25605837	25609837	K4me3 K27ac
ENSMUSG00000007827.10	Ankrd26	chr6	118560226	118564226	K4me3 K27ac
ENSMUSG00000007833.15	Aldh16a1	chr7	45152584	45156584	K4me3 K27ac
ENSMUSG00000007836.6	Hnrnpa0	chr13	58126556	58130556	K4me3 K27ac
ENSMUSG00000007837.11	Prrg2	chr7	45060677	45064677	K4me3 K27ac
ENSMUSG00000007850.16	Hnrnph1	chr11	50382962	50386962	K4me1
ENSMUSG00000007867.9	Ift43	chr12	86080586	86084586	K4me3
ENSMUSG00000007872.3	Id3	chr4	136142973	136146973	Repressed
ENSMUSG00000007880.16	Arid1a	chr4	133718776	133722776	Unmarked
ENSMUSG00000007888.15	Crlf1	chr8	70491157	70495157	Repressed
ENSMUSG00000007891.16	Ctsd	chr7	142385857	142389857	K4me3 K27ac
ENSMUSG00000007892.8	Rplp1	chr9	61912542	61916542	K4me3 K27ac
ENSMUSG00000007908.14	Hmgcll1	chr9	76012854	76016854	K4me3 K27ac
ENSMUSG00000007946.11	Phox2a	chr7	101818745	101822745	Bivalent
ENSMUSG00000007950.9	Abhd8	chr8	71456907	71460907	Unmarked
ENSMUSG00000007987.12	Ift22	chr5	136906242	136910242	K4me3 K4me1
ENSMUSG00000007989.7	Fzd3	chr14	65260463	65264463	K4me3
ENSMUSG00000008036.11	Ap2s1	chr7	16736537	16740537	K4me3 K27ac
ENSMUSG00000008090.14	Fgfrl1	chr5	108692267	108696267	Unmarked
ENSMUSG00000008129.14	4930432K21Rik	chr8	84146158	84150158	Bivalent
ENSMUSG00000008136.14	Fhl2	chr1	43194984	43198984	Unmarked
ENSMUSG00000008140.18	Emc10	chr7	44494428	44498428	K4me3 K27ac
ENSMUSG00000008167.14	Fbxw9	chr8	85058096	85062096	K4me3 K27ac
ENSMUSG00000008200.15	Fnbp4	chr2	90756406	90760406	Unmarked
ENSMUSG00000008226.14	Scrn3	chr2	73310658	73314658	K4me3 K27ac
ENSMUSG00000008301.11	Phax	chr18	56560592	56564592	K4me3
ENSMUSG00000008305.18	Tle1	chr4	72198893	72202893	K4me3 K27ac
ENSMUSG00000008307.11	1700109H08Rik	chr5	3576222	3580222	Unmarked
ENSMUSG00000008318.10	Relt	chr7	100861158	100865158	K4me3
ENSMUSG00000008333.12	Snrpb2	chr2	143066172	143070172	Unmarked
ENSMUSG00000008348.9	Ubc	chr5	125387186	125391186	K4me3 K27ac
ENSMUSG00000008373.16	Prpf31	chr7	3628556	3632556	K4me3 K27ac
ENSMUSG00000008384.8	Sertad1	chr7	27484909	27488909	K4me3 K27ac
ENSMUSG00000008429.8	Herpud2	chr9	25149820	25153820	K4me3 K4me1 K27ac
ENSMUSG00000008435.15	Rdh13	chr7	4443642	4447642	K4me3
ENSMUSG00000008450.8	Nutf2	chr8	105858644	105862644	K4me3 K27ac
ENSMUSG00000008475.13	Arpc5	chr1	152766498	152770498	K4me3 K27ac
ENSMUSG00000008489.18	Elavl2	chr4	91252582	91256582	Unmarked
ENSMUSG00000008496.19	Pou2f2	chr7	25130488	25134488	Repressed
ENSMUSG00000008540.11	Mgst1	chr6	138138553	138142553	Bivalent
ENSMUSG00000008575.17	Nfib	chr4	82497316	82501316	Repressed
ENSMUSG00000008590.4	Htr3b	chr9	48962990	48966990	Repressed
ENSMUSG00000008604.11	Ubqln4	chr3	88561906	88565906	Unmarked
ENSMUSG00000008658.16	Rbfox1	chr16	6347137	6351137	Bivalent
ENSMUSG00000008668.15	Rps18	chr17	33950541	33954541	K4me3 K27ac
ENSMUSG00000008683.16	Rps15a	chr7	118113256	118117256	K4me3 K27ac
ENSMUSG00000008690.15	Ncaph2	chr15	89353913	89357913	Bivalent
ENSMUSG00000008730.17	Hipk1	chr3	103789275	103793275	Repressed
ENSMUSG00000008734.9	Gprc5b	chr7	118982644	118986644	Unmarked
ENSMUSG00000008763.16	Man1a2	chr3	100682613	100686613	K4me3 K4me1 K27ac
ENSMUSG00000008822.15	Acyp1	chr12	85278435	85282435	Unmarked
ENSMUSG00000008855.17	Hdac5	chr11	102197493	102201493	Unmarked
ENSMUSG00000008859.8	Rala	chr13	17941949	17945949	K4me3 K27ac
ENSMUSG00000008892.12	Vdac3	chr8	22584121	22588121	Unmarked
ENSMUSG00000008958.14	Vps72	chr3	95109072	95113072	K4me3
ENSMUSG00000008976.16	Gabpa	chr16	84832924	84836924	K4me3 K27ac
ENSMUSG00000008999.7	Bmp7	chr2	172938321	172942321	Bivalent
ENSMUSG00000009030.14	Pdcl	chr2	37357196	37361196	K4me3 K27ac
ENSMUSG00000009035.15	Tmem184b	chr15	79367993	79371993	K4me1 K27ac
ENSMUSG00000009073.16	Nf2	chr11	4818396	4822396	K4me1
ENSMUSG00000009075.2	Cabp7	chr11	4744778	4748778	K4me3 K27ac
ENSMUSG00000009076.10	Zmat5	chr11	4702677	4706677	K4me3 K27ac
ENSMUSG00000009079.16	Ewsr1	chr11	5097042	5101042	K4me3 K4me1 K27ac
ENSMUSG00000009090.17	Ap1b1	chr11	4984823	4988823	K4me3 K27ac
ENSMUSG00000009097.10	Tbx1	chr16	18588671	18592671	Bivalent
ENSMUSG00000009112.4	Bcl2l13	chr6	120834211	120838211	K4me3 K27ac
ENSMUSG00000009114.17	2610028H24Rik	chr10	76447080	76451080	Bivalent
ENSMUSG00000009145.6	Dqx1	chr6	83055843	83059843	Unmarked
ENSMUSG00000009207.15	Lnpk	chr2	74577435	74581435	K4me3 K27ac
ENSMUSG00000009210.10	Prr29	chr11	106372844	106376844	K4me1
ENSMUSG00000009281.6	Rarres2	chr6	48570646	48574646	Unmarked
ENSMUSG00000009291.13	Pttg1ip	chr10	77579821	77583821	K4me3 K27ac
ENSMUSG00000009293.17	Ube2g2	chr10	77620377	77624377	K4me3 K27ac
ENSMUSG00000009376.15	Met	chr6	17544972	17548972	Unmarked
ENSMUSG00000009394.13	Syn2	chr6	115132949	115136949	K4me3 K27ac
ENSMUSG00000009418.16	Nav1	chr1	135451907	135455907	Unmarked
ENSMUSG00000009470.17	Tnpo1	chr13	98924354	98928354	K4me3 K27ac
ENSMUSG00000009535.13	Rnmt	chr18	68298421	68302421	K4me3 K27ac
ENSMUSG00000009545.14	Kcnq1	chr7	143105253	143109253	K4me1
ENSMUSG00000009549.14	Srp14	chr2	118476883	118480883	K4me3 K27ac
ENSMUSG00000009555.16	Cdk9	chr2	32710253	32714253	K4me3 K27ac
ENSMUSG00000009563.16	Tor2a	chr2	32755244	32759244	K4me3 K4me1
ENSMUSG00000009566.12	Fpgs	chr2	32702031	32706031	Unmarked
ENSMUSG00000009569.14	Mrtfb	chr16	13254480	13258480	K4me3 K4me1
ENSMUSG00000009575.14	Cbx5	chr15	103213366	103217366	K4me1
ENSMUSG00000009585.18	Apobec3	chr15	79890407	79894407	K4me3 K4me1 K27ac
ENSMUSG00000009614.16	Sardh	chr2	27223192	27227192	Unmarked
ENSMUSG00000009621.18	Vav2	chr2	27424912	27428912	K4me3 K4me1
ENSMUSG00000009628.14	Tex15	chr8	33568543	33572543	Unmarked
ENSMUSG00000009630.10	Ppp2cb	chr8	33597624	33601624	K4me3 K4me1
ENSMUSG00000009633.3	G0s2	chr1	193271217	193275217	Unmarked
ENSMUSG00000009640.11	Dmap1	chr4	117680271	117684271	K4me3 K4me1
ENSMUSG00000009647.13	Mcu	chr10	59456160	59460160	Unmarked
ENSMUSG00000009681.10	Bcr	chr10	75172970	75176970	K4me1 K27ac
ENSMUSG00000009733.9	Tfcp2	chr15	100510244	100514244	K4me1
ENSMUSG00000009734.18	Pou6f2	chr13	18380041	18384041	Unmarked
ENSMUSG00000009739.17	Pou6f1	chr15	100584365	100588365	Unmarked
ENSMUSG00000009741.15	Ubp1	chr9	113929434	113933434	K4me3 K27ac
ENSMUSG00000009772.15	Nuak2	chr1	132314125	132318125	K4me3 K4me1 K27ac
ENSMUSG00000009828.15	Ick	chr9	78111283	78115283	K4me3 K4me1
ENSMUSG00000009863.14	Sdhb	chr4	140959402	140963402	K4me3 K27ac
ENSMUSG00000009876.13	Cox4i2	chr2	152752172	152756172	Repressed
ENSMUSG00000009894.15	Snap47	chr11	59449186	59453186	K4me3 K27ac
ENSMUSG00000009905.5	Kdsr	chr1	106757727	106761727	K4me3 K27ac
ENSMUSG00000009907.17	Vps4b	chr1	106780794	106784794	K4me1
ENSMUSG00000009927.9	Rps25	chr9	44405138	44409138	K4me3 K27ac
ENSMUSG00000010021.13	Kif19a	chr11	114763387	114767387	K4me1
ENSMUSG00000010025.19	Aldh3a2	chr11	61265185	61269185	K4me3 K4me1 K27ac
ENSMUSG00000010045.2	Tmem115	chr9	107531944	107535944	K4me3 K27ac
ENSMUSG00000010047.12	Hyal2	chr9	107565944	107569944	K4me3
ENSMUSG00000010048.10	Ifrd2	chr9	107590084	107594084	Unmarked
ENSMUSG00000010051.15	Hyal1	chr9	107574926	107578926	K4me1 K27ac
ENSMUSG00000010054.4	Tusc2	chr9	107561369	107565369	K4me3 K27ac
ENSMUSG00000010057.8	Nprl2	chr9	107540240	107544240	K4me3 K27ac
ENSMUSG00000010064.15	Slc38a3	chr9	107667003	107671003	Bivalent
ENSMUSG00000010067.13	Rassf1	chr9	107549561	107553561	Unmarked
ENSMUSG00000010080.15	Epn3	chr11	94496250	94500250	Bivalent
ENSMUSG00000010086.17	Rnf112	chr11	61451919	61455919	Bivalent
ENSMUSG00000010095.13	Slc3a2	chr19	8711356	8715356	K4me3 K27ac
ENSMUSG00000010097.15	Nxf1	chr19	8768091	8772091	K4me3 K27ac
ENSMUSG00000010110.17	Stx5a	chr19	8746532	8750532	Unmarked
ENSMUSG00000010142.12	Tnfrsf13b	chr11	61138834	61142834	Repressed
ENSMUSG00000010154.7	Spire2	chr8	123348250	123352250	Unmarked
ENSMUSG00000010175.13	Prox1	chr1	190168714	190172714	K4me3 K4me1 K27ac
ENSMUSG00000010205.11	Raver1	chr9	21090008	21094008	K4me3 K27ac
ENSMUSG00000010277.7	2610507B11Rik	chr11	78259751	78263751	K4me3 K4me1
ENSMUSG00000010290.7	AI597479	chr1	43096709	43100709	K4me3 K27ac
ENSMUSG00000010307.7	Tmem86a	chr7	47049864	47053864	K4me3
ENSMUSG00000010358.13	Ifi35	chr11	101446406	101450406	K4me3 K27ac
ENSMUSG00000010362.9	Rdm1	chr11	101625941	101629941	K4me3 K27ac
ENSMUSG00000010376.15	Nedd8	chr14	55669877	55673877	K4me3 K27ac
ENSMUSG00000010392.8	Gosr1	chr11	76761567	76765567	Repressed
ENSMUSG00000010406.12	Mrpl52	chr14	54424922	54428922	K4me3 K27ac
ENSMUSG00000010453.12	Kansl3	chr1	36366014	36370014	K4me3
ENSMUSG00000010461.15	Eya4	chr10	23183566	23187566	Unmarked
ENSMUSG00000010476.14	Ebf3	chr7	137312445	137316445	Bivalent
ENSMUSG00000010517.7	Faf1	chr4	109838784	109842784	Unmarked
ENSMUSG00000010538.14	Tsacc	chr3	88294896	88298896	K4me3 K27ac
ENSMUSG00000010554.14	Mettl16	chr11	74768829	74772829	K4me3 K27ac
ENSMUSG00000010592.9	Dazl	chr17	50281323	50285323	Unmarked
ENSMUSG00000010607.8	Pigyl	chr9	22154845	22158845	K4me3 K27ac
ENSMUSG00000010608.15	Rbm25	chr12	83630251	83634251	K4me3 K4me1 K27ac
ENSMUSG00000010609.15	Psen2	chr1	180228062	180232062	Unmarked
ENSMUSG00000010660.3	Plcd1	chr9	119086261	119090261	Unmarked
ENSMUSG00000010663.5	Fads1	chr19	10191318	10195318	Unmarked
ENSMUSG00000010721.15	Lmbr1	chr5	29359090	29363090	Unmarked
ENSMUSG00000010751.15	Tnfrsf22	chr7	143634585	143638585	Unmarked
ENSMUSG00000010755.17	Cars	chr7	143598031	143602031	K4me3 K27ac
ENSMUSG00000010830.8	Kdelr3	chr15	79514410	79518410	K4me3
ENSMUSG00000010911.12	Apip	chr2	103071694	103075694	K4me3 K27ac
ENSMUSG00000010914.10	Pdhx	chr2	103071462	103075462	K4me3 K27ac
ENSMUSG00000010936.11	Vac14	chr8	110616598	110620598	K4me3 K4me1
ENSMUSG00000011034.6	Slc5a1	chr5	33102218	33106218	Bivalent
ENSMUSG00000011096.17	Akt1s1	chr7	44846990	44850990	K4me3 K27ac
ENSMUSG00000011114.18	Tbrg1	chr9	37655237	37659237	K4me3 K27ac
ENSMUSG00000011148.14	Adssl1	chr12	112618092	112622092	K4me3
ENSMUSG00000011158.8	Brf1	chr12	112998432	113002432	K4me3 K4me1
ENSMUSG00000011171.11	Vipr2	chr12	116075759	116079759	K4me3
ENSMUSG00000011179.8	Odc1	chr12	17547457	17551457	K4me1
ENSMUSG00000011254.16	Thg1l	chr11	45953483	45957483	Unmarked
ENSMUSG00000011256.16	Adam19	chr11	46053991	46057991	Repressed
ENSMUSG00000011257.19	Pabpc4	chr4	123281094	123285094	K4me3 K27ac
ENSMUSG00000011263.16	Exoc3l2	chr7	19461330	19465330	Unmarked
ENSMUSG00000011267.8	Zfp296	chr7	19575828	19579828	K4me3 K4me1
ENSMUSG00000011306.7	Sugp1	chr8	70041048	70045048	K4me3 K27ac
ENSMUSG00000011427.16	Zfp790	chr7	29816990	29820990	K4me3 K4me1
ENSMUSG00000011463.5	Cpb1	chr3	20264443	20268443	Repressed
ENSMUSG00000011589.9	Fsd1	chr17	55984514	55988514	Repressed
ENSMUSG00000011658.16	Fuz	chr7	44894251	44898251	K4me3 K4me1 K27ac
ENSMUSG00000011751.16	Sptbn4	chr7	27394198	27398198	K4me3 K27ac
ENSMUSG00000011752.7	Pgam1	chr19	41910075	41914075	K4me3 K27ac
ENSMUSG00000011831.16	Evi5	chr5	107807782	107811782	Unmarked
ENSMUSG00000011832.15	Evi5l	chr8	4164566	4168566	K4me3 K27ac
ENSMUSG00000011837.4	Snapc2	chr8	4251418	4255418	K4me3 K27ac
ENSMUSG00000011877.13	Git1	chr11	77491561	77495561	K4me3 K27ac
ENSMUSG00000011884.13	Gltp	chr5	114688908	114692908	K4me3
ENSMUSG00000011958.17	Bnip2	chr9	69987514	69991514	K4me3 K4me1 K27ac
ENSMUSG00000011960.12	Ccnt1	chr15	98565636	98569636	K4me3 K27ac
ENSMUSG00000012017.4	Scarf2	chr16	17801401	17805401	Bivalent
ENSMUSG00000012076.8	Brms1l	chr12	55842191	55846191	Unmarked
ENSMUSG00000012114.17	Med15	chr16	17651055	17655055	Unmarked
ENSMUSG00000012117.13	Dhdds	chr4	133994924	133998924	Unmarked
ENSMUSG00000012123.17	Crybg2	chr4	134080311	134084311	K4me3
ENSMUSG00000012126.16	Ubxn11	chr4	134106348	134110348	Unmarked
ENSMUSG00000012296.16	Tjap1	chr17	46270155	46274155	Unmarked
ENSMUSG00000012405.16	Rpl15	chr14	18269391	18273391	K4me3 K27ac
ENSMUSG00000012422.14	Tmem167	chr13	90087122	90091122	K4me3 K27ac
ENSMUSG00000012429.9	Mplkip	chr13	17693432	17697432	K4me3 K4me1 K27ac
ENSMUSG00000012443.4	Kif11	chr19	37400180	37404180	Unmarked
ENSMUSG00000012483.4	Rpa3	chr6	8257173	8261173	K4me3 K27ac
ENSMUSG00000012519.14	Mlkl	chr8	111336177	111340177	K4me3
ENSMUSG00000012520.10	Phox2b	chr5	67097057	67101057	Repressed
ENSMUSG00000012535.14	Tnpo3	chr6	29607623	29611623	K4me3 K27ac
ENSMUSG00000012609.19	Ttll5	chr12	85822977	85826977	K4me3 K27ac
ENSMUSG00000012640.16	Zfp715	chr7	43311294	43315294	K4me3 K27ac
ENSMUSG00000012819.15	Cdh23	chr10	60404453	60408453	Unmarked
ENSMUSG00000012848.15	Rps5	chr7	12920289	12924289	K4me3 K27ac
ENSMUSG00000013033.16	Adgrl1	chr8	83898734	83902734	K4me3
ENSMUSG00000013089.15	Etv5	chr16	22437719	22441719	K4me3 K27ac
ENSMUSG00000013150.15	Gfod2	chr8	105756630	105760630	K4me3 K27ac
ENSMUSG00000013155.10	Enkd1	chr8	105706210	105710210	K4me3
ENSMUSG00000013160.7	Atp6v0d1	chr8	105564047	105568047	K4me3 K27ac
ENSMUSG00000013236.17	Ptprs	chr17	56474439	56478439	Bivalent
ENSMUSG00000013275.9	Slc41a1	chr1	131825492	131829492	K4me3 K27ac
ENSMUSG00000013367.5	Iglon5	chr7	43476233	43480233	Unmarked
ENSMUSG00000013415.9	Igf2bp1	chr11	95980611	95984611	Repressed
ENSMUSG00000013465.19	Nelfb	chr2	25208726	25212726	K4me3 K27ac
ENSMUSG00000013495.15	Tmem175	chr5	108628001	108632001	K4me3 K27ac
ENSMUSG00000013539.14	Tango2	chr16	18304121	18308121	Unmarked
ENSMUSG00000013593.12	Ndufs2	chr1	171245122	171249122	K4me3 K27ac
ENSMUSG00000013622.15	Atraid	chr5	31046311	31050311	K4me3 K27ac
ENSMUSG00000013629.16	Cad	chr5	31052927	31056927	K4me3 K4me1 K27ac
ENSMUSG00000013646.17	Sh3bp5l	chr11	58343311	58347311	Unmarked
ENSMUSG00000013662.6	Atad1	chr19	32692870	32696870	Unmarked
ENSMUSG00000013663.7	Pten	chr19	32755594	32759594	K4me3 K27ac
ENSMUSG00000013698.12	Pea15a	chr1	172197815	172201815	K4me1
ENSMUSG00000013701.13	Timm23	chr14	32189957	32193957	K4me1
ENSMUSG00000013736.16	Trnt1	chr6	106767119	106771119	K4me3 K27ac
ENSMUSG00000013787.15	Ehmt2	chr17	34904743	34908743	Unmarked
ENSMUSG00000013822.7	Elof1	chr9	22115172	22119172	K4me3 K4me1 K27ac
ENSMUSG00000013833.15	Med16	chr10	79906321	79910321	K4me3 K27ac
ENSMUSG00000013846.10	St3gal1	chr15	67127023	67131023	Unmarked
ENSMUSG00000013858.14	Tmem259	chr10	79976776	79980776	Unmarked
ENSMUSG00000013878.18	Rnf170	chr8	26117387	26121387	K4me3 K4me1 K27ac
ENSMUSG00000013928.13	Thap8	chr7	30278555	30282555	K4me3 K27ac
ENSMUSG00000013973.12	Dedd	chr1	171328085	171332085	K4me3 K27ac
ENSMUSG00000013997.10	Nit1	chr1	171342467	171346467	K4me3 K27ac
ENSMUSG00000014039.18	Prdm15	chr16	97849227	97853227	K4me3 K27ac
ENSMUSG00000014074.17	Rnf168	chr16	32275460	32279460	K4me3 K27ac
ENSMUSG00000014075.15	Tctex1d2	chr16	32417701	32421701	Unmarked
ENSMUSG00000014077.13	Chp1	chr2	119545811	119549811	K4me3 K27ac
ENSMUSG00000014158.12	Trpv4	chr5	114656421	114660421	Unmarked
ENSMUSG00000014164.15	Klhl3	chr13	58111592	58115592	K4me3 K4me1
ENSMUSG00000014177.10	Tvp23b	chr11	62881661	62885661	K4me1
ENSMUSG00000014195.15	Dnajc7	chr11	100594708	100598708	Unmarked
ENSMUSG00000014232.14	Cluap1	chr16	3906824	3910824	K4me3 K27ac
ENSMUSG00000014243.5	Zswim7	chr11	62279375	62283375	K4me3 K27ac
ENSMUSG00000014245.8	Pigl	chr11	62456607	62460607	K4me3 K27ac
ENSMUSG00000014294.4	Ndufa2	chr18	36742557	36746557	K4me3 K27ac
ENSMUSG00000014301.13	Pam16	chr16	4614988	4618988	Unmarked
ENSMUSG00000014303.13	Glis2	chr16	4609627	4613627	Unmarked
ENSMUSG00000014329.14	Bicc1	chr10	71157700	71161700	K4me3 K4me1 K27ac
ENSMUSG00000014349.7	Ube2z	chr11	96063388	96067388	K4me3 K4me1 K27ac
ENSMUSG00000014353.15	Tmem87b	chr2	128816302	128820302	K4me3 K27ac
ENSMUSG00000014355.10	Anapc1	chr2	128685354	128689354	K4me3 K27ac
ENSMUSG00000014402.15	Tsg101	chr7	46917969	46921969	K4me3 K27ac
ENSMUSG00000014418.16	Hps5	chr7	46766463	46770463	Bivalent
ENSMUSG00000014426.9	Map3k4	chr17	12316391	12320391	K4me3 K27ac
ENSMUSG00000014444.17	Piezo1	chr8	122481000	122485000	Unmarked
ENSMUSG00000014470.4	Rnf166	chr8	122473688	122477688	Bivalent
ENSMUSG00000014496.8	Ankrd28	chr14	31740829	31744829	Unmarked
ENSMUSG00000014498.9	Ankrd52	chr10	128375118	128379118	K4me3
ENSMUSG00000014503.15	Pkd2l2	chr18	34407425	34411425	K4me3 K4me1
ENSMUSG00000014504.16	Srp19	chr18	34329144	34333144	K4me3 K27ac
ENSMUSG00000014547.10	Wdfy2	chr14	62835677	62839677	K4me3 K4me1
ENSMUSG00000014550.14	Rbsn	chr6	92212925	92216925	K4me3 K27ac
ENSMUSG00000014551.8	Mrps25	chr6	92181971	92185971	K4me3 K4me1
ENSMUSG00000014554.13	Dguok	chr6	83504969	83508969	K4me3 K27ac
ENSMUSG00000014592.20	Camta1	chr4	151859669	151863669	K4me3 K27ac
ENSMUSG00000014599.10	Csf1	chr3	107758242	107762242	K4me3 K27ac
ENSMUSG00000014601.13	Strip1	chr3	107629694	107633694	K4me3 K27ac
ENSMUSG00000014606.14	Slc25a11	chr11	70645479	70649479	Bivalent
ENSMUSG00000014633.15	Cmc2	chr8	116919422	116923422	K4me3 K27ac
ENSMUSG00000014668.15	Chfr	chr5	110133859	110137859	K4me3 K27ac
ENSMUSG00000014704.10	Hoxa2	chr6	52162831	52166831	Repressed
ENSMUSG00000014748.13	Tex261	chr6	83770475	83774475	Unmarked
ENSMUSG00000014763.8	Fam120b	chr17	15394247	15398247	K4me3 K27ac
ENSMUSG00000014767.17	Tbp	chr17	15497909	15501909	K4me3 K27ac
ENSMUSG00000014769.10	Psmb1	chr17	15476589	15480589	Unmarked
ENSMUSG00000014771.13	Pdcd2	chr17	15525084	15529084	K4me3 K27ac
ENSMUSG00000014773.13	Dll1	chr17	15366390	15370390	Unmarked
ENSMUSG00000014776.7	Nol3	chr8	105274139	105278139	K4me3 K4me1
ENSMUSG00000014778.10	Fhod1	chr8	105345953	105349953	K4me3
ENSMUSG00000014786.8	Slc9a5	chr8	105353461	105357461	Unmarked
ENSMUSG00000014813.9	Stc1	chr14	69027237	69031237	Bivalent
ENSMUSG00000014837.15	4931428F04Rik	chr8	105287504	105291504	K4me3 K27ac
ENSMUSG00000014846.12	Tppp3	chr8	105467410	105471410	K4me3 K4me1
ENSMUSG00000014850.15	Msh3	chr13	92352996	92356996	K4me3 K27ac
ENSMUSG00000014856.12	Tmem208	chr8	105324353	105328353	K4me3 K27ac
ENSMUSG00000014859.9	E2f4	chr8	105301924	105305924	K4me1
ENSMUSG00000014867.9	Surf4	chr2	26931781	26935781	K4me3 K27ac
ENSMUSG00000014873.15	Surf2	chr2	26914366	26918366	K4me3 K27ac
ENSMUSG00000014905.4	Dnajb9	chr12	44208068	44212068	K4me3 K27ac
ENSMUSG00000014907.10	Naf1	chr8	66858956	66862956	K4me3 K4me1
ENSMUSG00000014932.15	Yes1	chr5	32609197	32613197	K4me3 K27ac
ENSMUSG00000014956.15	Ppp1cb	chr5	32457221	32461221	K4me3 K4me1 K27ac
ENSMUSG00000014959.12	Gorasp2	chr2	70659575	70663575	K4me3 K27ac
ENSMUSG00000014980.14	Tsen15	chr1	152384688	152388688	K4me3
ENSMUSG00000015002.18	Efr3a	chr15	65785839	65789839	K4me3 K27ac
ENSMUSG00000015013.9	Trappc2l	chr8	122609639	122613639	K4me3 K4me1 K27ac
ENSMUSG00000015016.8	Acsf3	chr8	122773577	122777577	K4me3 K27ac
ENSMUSG00000015023.7	Ddx19a	chr8	110995770	110999770	K4me3 K27ac
ENSMUSG00000015027.11	Galns	chr8	122609463	122613463	K4me3 K4me1 K27ac
ENSMUSG00000015053.14	Gata2	chr6	88202444	88206444	Repressed
ENSMUSG00000015083.11	C8g	chr2	25498613	25502613	K4me3 K27ac
ENSMUSG00000015085.8	Entpd2	chr2	25396752	25400752	Unmarked
ENSMUSG00000015087.14	Rabl6	chr2	25606456	25610456	K4me3 K27ac
ENSMUSG00000015092.9	Edf1	chr2	25555846	25559846	K4me3 K27ac
ENSMUSG00000015094.16	Npdc1	chr2	25405691	25409691	Unmarked
ENSMUSG00000015095.12	Fbxw5	chr2	25498878	25502878	K4me3 K27ac
ENSMUSG00000015120.15	Ube2i	chr17	25272310	25276310	K4me3 K27ac
ENSMUSG00000015126.9	Tsr3	chr17	25238169	25242169	K4me3 K27ac
ENSMUSG00000015127.14	Unkl	chr17	25186913	25190913	Repressed
ENSMUSG00000015133.17	Lrrk1	chr7	66386307	66390307	K4me3 K4me1
ENSMUSG00000015134.15	Aldh1a3	chr7	66423701	66427701	Repressed
ENSMUSG00000015143.15	Actn1	chr12	80258091	80262091	K4me3 K27ac
ENSMUSG00000015149.14	Sirt2	chr7	28764766	28768766	K4me3 K27ac
ENSMUSG00000015165.16	Hnrnpl	chr7	28808939	28812939	K4me3 K27ac
ENSMUSG00000015176.11	Nolc1	chr19	46074053	46078053	K4me3 K27ac
ENSMUSG00000015189.12	Casd1	chr6	4598838	4602838	K4me3 K4me1 K27ac
ENSMUSG00000015202.13	Cnksr3	chr10	7210237	7214237	K4me3 K27ac
ENSMUSG00000015222.18	Map2	chr1	66360195	66364195	Unmarked
ENSMUSG00000015224.10	Cyp2j9	chr4	96589578	96593578	K4me3 K4me1
ENSMUSG00000015243.4	Abca1	chr4	53157895	53161895	K4me3 K27ac
ENSMUSG00000015247.10	Nipsnap3b	chr4	53009949	53013949	K4me3 K27ac
ENSMUSG00000015305.6	Sash1	chr10	8754761	8758761	Unmarked
ENSMUSG00000015312.9	Gadd45b	chr10	80928072	80932072	K4me3 K27ac
ENSMUSG00000015335.16	Zdhhc12	chr2	30091019	30095019	K4me3 K27ac
ENSMUSG00000015337.5	Endog	chr2	30169492	30173492	K4me3 K27ac
ENSMUSG00000015341.17	Golga7	chr8	23255021	23259021	K4me3 K27ac
ENSMUSG00000015354.8	Pcolce2	chr9	95635600	95639600	Bivalent
ENSMUSG00000015355.13	Cd48	chr1	171680008	171684008	Unmarked
ENSMUSG00000015357.10	Clpx	chr9	65292331	65296331	K4me3 K4me1 K27ac
ENSMUSG00000015377.10	Dennd6b	chr15	89194448	89198448	K4me3 K4me1 K27ac
ENSMUSG00000015396.4	Cd83	chr13	43783184	43787184	K4me3 K4me1
ENSMUSG00000015451.16	C4a	chr17	34821464	34825464	Unmarked
ENSMUSG00000015452.14	Ager	chr17	34595893	34599893	Unmarked
ENSMUSG00000015461.15	Atf6b	chr17	34645200	34649200	K4me3
ENSMUSG00000015467.14	Egfl8	chr17	34613321	34617321	Unmarked
ENSMUSG00000015468.14	Notch4	chr17	34562336	34566336	Repressed
ENSMUSG00000015474.16	Ppt2	chr17	34625377	34629377	K4me3 K27ac
ENSMUSG00000015476.6	Prrt1	chr17	34629403	34633403	K4me3
ENSMUSG00000015478.13	Rnf5	chr17	34601661	34605661	K4me3 K4me1 K27ac
ENSMUSG00000015484.3	Fam163a	chr1	156203026	156207026	Repressed
ENSMUSG00000015488.14	Cacfd1	chr2	27007925	27011925	K4me3 K4me1 K27ac
ENSMUSG00000015501.10	Hivep2	chr10	13964378	13968378	K4me3 K27ac
ENSMUSG00000015522.18	Arnt	chr3	95432518	95436518	K4me3 K4me1 K27ac
ENSMUSG00000015536.14	Mocs2	chr13	114816276	114820276	K4me3 K27ac
ENSMUSG00000015542.17	Nat9	chr11	115185081	115189081	K4me3 K27ac
ENSMUSG00000015568.16	Lpl	chr8	68878490	68882490	K4me3 K27ac
ENSMUSG00000015575.15	Atp6v0e	chr17	26674411	26678411	K4me3 K4me1 K27ac
ENSMUSG00000015597.17	Zfp318	chr17	46381730	46385730	K4me3 K4me1
ENSMUSG00000015599.9	Ttbk1	chr17	46485675	46489675	Repressed
ENSMUSG00000015605.6	Srf	chr17	46549019	46553019	K4me3 K4me1 K27ac
ENSMUSG00000015647.9	Lama5	chr2	180176403	180180403	Unmarked
ENSMUSG00000015652.9	Steap1	chr5	5747326	5751326	Repressed
ENSMUSG00000015653.13	Steap2	chr5	5692326	5696326	K4me3 K27ac
ENSMUSG00000015656.17	Hspa8	chr9	40800341	40804341	K4me3 K27ac
ENSMUSG00000015659.12	Serac1	chr17	6049388	6053388	K4me1 K27ac
ENSMUSG00000015671.11	Psma2	chr13	14611239	14615239	K4me3 K27ac
ENSMUSG00000015672.4	Mrpl32	chr13	14611015	14615015	K4me3 K27ac
ENSMUSG00000015697.14	Setdb1	chr3	95355156	95359156	Unmarked
ENSMUSG00000015702.13	Anxa9	chr3	95304804	95308804	Unmarked
ENSMUSG00000015709.9	Arnt2	chr7	84370495	84374495	Unmarked
ENSMUSG00000015711.8	Prune1	chr3	95266944	95270944	Unmarked
ENSMUSG00000015714.11	Cers2	chr3	95316791	95320791	K4me1
ENSMUSG00000015733.13	Capza2	chr6	17634233	17638233	K4me3
ENSMUSG00000015745.9	Plekho1	chr3	95994001	95998001	K4me3
ENSMUSG00000015747.5	Vps45	chr3	96055830	96059830	K4me3 K27ac
ENSMUSG00000015748.13	Prpf3	chr3	95847574	95851574	Unmarked
ENSMUSG00000015749.12	Anp32e	chr3	95927277	95931277	K4me3
ENSMUSG00000015750.15	Aph1a	chr3	95892464	95896464	K4me3 K27ac
ENSMUSG00000015755.16	Tab2	chr10	7922260	7926260	K4me1
ENSMUSG00000015757.10	Ppil4	chr10	7790907	7794907	K4me3 K27ac
ENSMUSG00000015759.11	Cnih1	chr14	46778262	46782262	Unmarked
ENSMUSG00000015766.14	Eps8	chr6	137646283	137650283	K4me3 K27ac
ENSMUSG00000015776.12	Med22	chr2	26908578	26912578	K4me3 K27ac
ENSMUSG00000015790.16	Surf1	chr2	26912759	26916759	K4me3 K27ac
ENSMUSG00000015804.14	Med28	chr5	45518302	45522302	K4me3 K27ac
ENSMUSG00000015829.13	Tnr	chr1	159521840	159525840	K4me3 K27ac
ENSMUSG00000015837.15	Sqstm1	chr11	50200954	50204954	K4me1 K27ac
ENSMUSG00000015839.6	Nfe2l2	chr2	75702641	75706641	K4me3 K27ac
ENSMUSG00000015843.10	Rxrg	chr1	167596459	167600459	Repressed
ENSMUSG00000015846.15	Rxra	chr2	27723218	27727218	K4me1
ENSMUSG00000015850.11	Adamtsl4	chr3	95675151	95679151	Unmarked
ENSMUSG00000015852.13	Fcrls	chr3	87261738	87265738	Repressed
ENSMUSG00000015869.16	Prpsap1	chr11	116488348	116492348	K4me3
ENSMUSG00000015879.8	Fam184b	chr5	45534542	45538542	Unmarked
ENSMUSG00000015880.13	Ncapg	chr5	45690049	45694049	Unmarked
ENSMUSG00000015882.18	Lcorl	chr5	45855481	45859481	K4me3 K27ac
ENSMUSG00000015889.8	Lta4h	chr10	93472917	93476917	Unmarked
ENSMUSG00000015932.8	Dstn	chr2	143913319	143917319	K4me3 K27ac
ENSMUSG00000015937.15	Macroh2a1	chr13	56088058	56092058	K4me1
ENSMUSG00000015943.11	Bola1	chr3	96196489	96200489	K4me3 K4me1
ENSMUSG00000015944.9	Castor2	chr5	134097710	134101710	K4me3 K27ac
ENSMUSG00000015947.10	Fcgr1	chr3	96291969	96295969	Repressed
ENSMUSG00000015950.13	Ncf1	chr5	134226399	134230399	K4me1
ENSMUSG00000015957.12	Wnt11	chr7	98836897	98840897	Repressed
ENSMUSG00000015961.8	Adss	chr1	177794501	177798501	K4me3 K4me1 K27ac
ENSMUSG00000015968.18	Cacna1d	chr14	30098763	30102763	Unmarked
ENSMUSG00000015970.19	Chdh	chr14	30007170	30011170	Repressed
ENSMUSG00000015971.5	Actr8	chr14	29986952	29990952	Unmarked
ENSMUSG00000015980.14	Lrrc27	chr7	139218610	139222610	K4me1 K27ac
ENSMUSG00000015981.12	Stk32c	chr7	139211307	139215307	K4me3 K27ac
ENSMUSG00000015994.10	Fnta	chr8	26009247	26013247	K4me1
ENSMUSG00000016018.4	Mtrex	chr13	112879527	112883527	Unmarked
ENSMUSG00000016028.10	Celsr1	chr15	86031777	86035777	K4me3
ENSMUSG00000016087.13	Fli1	chr9	32539595	32543595	Bivalent
ENSMUSG00000016128.14	Stard13	chr5	151188194	151192194	K4me3 K4me1 K27ac
ENSMUSG00000016179.11	Camk1g	chr1	193368225	193372225	K4me3 K4me1
ENSMUSG00000016181.9	Utp25	chr1	193115557	193119557	Unmarked
ENSMUSG00000016200.14	Syt14	chr1	193033662	193037662	K4me3 K4me1 K27ac
ENSMUSG00000016206.6	H2-M3	chr17	37268219	37272219	K4me3 K27ac
ENSMUSG00000016252.7	Atp5e	chr2	174462089	174466089	K4me3 K27ac
ENSMUSG00000016253.12	Nelfcd	chr2	174424361	174428361	Unmarked
ENSMUSG00000016255.5	Tubb1	chr2	174448694	174452694	Unmarked
ENSMUSG00000016257.15	Prelid3b	chr2	174470931	174474931	K4me3
ENSMUSG00000016344.14	Ppdpf	chr2	181185246	181189246	K4me3 K27ac
ENSMUSG00000016346.17	Kcnq2	chr2	181133300	181137300	Repressed
ENSMUSG00000016349.10	Eef1a2	chr2	181155014	181159014	K4me3
ENSMUSG00000016356.18	Col20a1	chr2	180984534	180988534	K4me1
ENSMUSG00000016386.15	Mpped2	chr2	106728489	106732489	Unmarked
ENSMUSG00000016477.18	E2f3	chr13	29982391	29986391	K4me3
ENSMUSG00000016481.15	Cr1l	chr1	195115641	195119641	K4me1
ENSMUSG00000016487.15	Ppfibp1	chr6	146994441	146998441	Unmarked
ENSMUSG00000016493.13	Cd46	chr1	195090249	195094249	K4me3 K27ac
ENSMUSG00000016495.12	Plgrkt	chr19	29359407	29363407	K4me3 K27ac
ENSMUSG00000016496.7	Cd274	chr19	29365454	29369454	K4me3 K27ac
ENSMUSG00000016503.17	Gtf3a	chr5	146946704	146950704	K4me3 K27ac
ENSMUSG00000016510.11	Mtif3	chr5	146961743	146965743	K4me3 K27ac
ENSMUSG00000016520.7	Lnx2	chr5	147074586	147078586	K4me3 K27ac
ENSMUSG00000016526.8	Dyrk3	chr1	131136340	131140340	K4me3 K4me1 K27ac
ENSMUSG00000016528.10	Mapkapk2	chr1	131095826	131099826	K4me3 K27ac
ENSMUSG00000016541.10	Atxn10	chr15	85334244	85338244	K4me3 K27ac
ENSMUSG00000016554.9	Eif3d	chr15	77966523	77970523	K4me1
ENSMUSG00000016559.14	H3f3b	chr11	116022514	116026514	K4me3 K27ac
ENSMUSG00000016619.10	Nup50	chr15	84921448	84925448	K4me3 K4me1 K27ac
ENSMUSG00000016624.15	Phf21b	chr15	84854049	84858049	K4me3 K27ac
ENSMUSG00000016637.7	Ift27	chr15	78164936	78168936	Unmarked
ENSMUSG00000016664.16	Pacsin2	chr15	83462606	83466606	K4me3
ENSMUSG00000016756.17	Cmah	chr13	24325419	24329419	Unmarked
ENSMUSG00000016757.11	Ttll12	chr15	83593157	83597157	K4me3
ENSMUSG00000016763.15	Scube1	chr15	83723021	83727021	Repressed
ENSMUSG00000016831.12	Tox4	chr14	52277145	52281145	K4me3 K27ac
ENSMUSG00000016833.14	Mrps18c	chr5	100796626	100800626	K4me3 K27ac
ENSMUSG00000016918.15	Sulf1	chr1	12726118	12730118	Unmarked
ENSMUSG00000016921.14	Srsf6	chr2	162929527	162933527	K4me3 K27ac
ENSMUSG00000016933.17	Plcg1	chr2	160729732	160733732	K4me3 K27ac
ENSMUSG00000016940.18	Kctd2	chr11	115418127	115422127	K4me3 K27ac
ENSMUSG00000016942.6	Tmprss6	chr15	78440435	78444435	Unmarked
ENSMUSG00000016946.6	Kctd5	chr17	24071485	24075485	K4me3 K4me1
ENSMUSG00000016984.7	Etaa1	chr11	17951875	17955875	K4me3 K4me1
ENSMUSG00000016995.17	Matn4	chr2	164402612	164406612	Repressed
ENSMUSG00000017007.9	Rbpjl	chr2	164401208	164405208	Repressed
ENSMUSG00000017009.3	Sdc4	chr2	164441887	164445887	K4me3 K27ac
ENSMUSG00000017119.19	Nbr1	chr11	101550866	101554866	K4me3 K27ac
ENSMUSG00000017132.17	Cyth1	chr11	118246560	118250560	K4me3 K27ac
ENSMUSG00000017144.8	Rnd3	chr2	51147094	51151094	K4me3 K27ac
ENSMUSG00000017146.12	Brca1	chr11	101520459	101524459	Unmarked
ENSMUSG00000017167.6	Cntnap1	chr11	101174040	101178040	K4me1
ENSMUSG00000017176.17	Nt5c3b	chr11	100438916	100442916	K4me3
ENSMUSG00000017188.3	Coa3	chr11	101277114	101281114	K4me3 K27ac
ENSMUSG00000017195.15	Zpbp2	chr11	98553442	98557442	Unmarked
ENSMUSG00000017210.14	Med24	chr11	98706003	98710003	Unmarked
ENSMUSG00000017221.14	Psmd3	chr11	98680590	98684590	K4me3 K27ac
ENSMUSG00000017264.16	Exosc10	chr4	148564356	148568356	Unmarked
ENSMUSG00000017286.15	Glod4	chr11	76237572	76241572	Unmarked
ENSMUSG00000017288.15	Vps53	chr11	76164201	76168201	K4me1
ENSMUSG00000017291.13	Taok1	chr11	77605815	77609815	K4me3 K27ac
ENSMUSG00000017299.13	Dnttip1	chr2	164743982	164747982	K4me3 K27ac
ENSMUSG00000017307.16	Acot8	chr2	164802822	164806822	K4me3 K27ac
ENSMUSG00000017314.12	Mpp2	chr11	102086455	102090455	K4me3
ENSMUSG00000017344.4	Vtn	chr11	78497171	78501171	Repressed
ENSMUSG00000017376.15	Nlk	chr11	78570399	78574399	K4me1
ENSMUSG00000017386.10	Traf4	chr11	78163589	78167589	K4me3 K4me1
ENSMUSG00000017390.15	Aldoc	chr11	78322199	78326199	Unmarked
ENSMUSG00000017400.10	Stac2	chr11	98041542	98045542	Unmarked
ENSMUSG00000017404.12	Rpl19	chr11	98024923	98028923	K4me3 K27ac
ENSMUSG00000017405.14	Nek8	chr11	78174634	78178634	K4me3 K27ac
ENSMUSG00000017412.15	Cacnb4	chr2	52674831	52678831	Bivalent
ENSMUSG00000017417.14	Plxdc1	chr11	97984399	97988399	K4me3
ENSMUSG00000017418.14	Arl5b	chr2	15072998	15076998	Unmarked
ENSMUSG00000017421.18	Zfp207	chr11	80381278	80385278	K4me3 K27ac
ENSMUSG00000017428.16	Psmd11	chr11	80426685	80430685	K4me3 K4me1
ENSMUSG00000017446.14	C1qtnf1	chr11	118426498	118430498	Repressed
ENSMUSG00000017453.4	Pipox	chr11	77880686	77884686	K4me1
ENSMUSG00000017466.9	Timp2	chr11	118353506	118357506	Unmarked
ENSMUSG00000017478.15	Zc3h18	chr8	122374680	122378680	K4me3 K27ac
ENSMUSG00000017485.11	Top2b	chr14	16410082	16414082	Unmarked
ENSMUSG00000017491.9	Rarb	chr14	16573440	16577440	Bivalent
ENSMUSG00000017493.12	Igfbp4	chr11	99040185	99044185	Bivalent
ENSMUSG00000017499.15	Cdc6	chr11	98906150	98910150	K4me1
ENSMUSG00000017548.15	Suz12	chr11	79993790	79997790	K4me3 K27ac
ENSMUSG00000017550.14	Atad5	chr11	80101002	80105002	Unmarked
ENSMUSG00000017561.16	Crlf3	chr11	80078861	80082861	K4me3
ENSMUSG00000017615.12	Tnfaip1	chr11	78534332	78538332	K4me3 K4me1 K27ac
ENSMUSG00000017631.19	Abr	chr11	76491929	76495929	K4me3 K4me1 K27ac
ENSMUSG00000017639.13	Rab11fip4	chr11	79589211	79593211	Repressed
ENSMUSG00000017652.16	Cd40	chr2	165053679	165057679	K4me3
ENSMUSG00000017664.16	Slc35c2	chr2	165285835	165289835	K4me3 K27ac
ENSMUSG00000017667.9	Zfp334	chr2	165386259	165390259	Unmarked
ENSMUSG00000017670.16	Elmo2	chr2	165309642	165313642	Unmarked
ENSMUSG00000017677.11	Wsb1	chr11	79252669	79256669	K4me3 K4me1
ENSMUSG00000017679.16	Ttpal	chr2	163600562	163604562	K4me3 K27ac
ENSMUSG00000017686.17	Rhot1	chr11	80207118	80211118	K4me3 K4me1
ENSMUSG00000017688.14	Hnf4g	chr3	3632149	3636149	Unmarked
ENSMUSG00000017692.8	Rhbdl3	chr11	80317689	80321689	Unmarked
ENSMUSG00000017697.3	Ada	chr2	163728866	163732866	Unmarked
ENSMUSG00000017707.9	Serinc3	chr2	163643131	163647131	K4me3 K27ac
ENSMUSG00000017713.9	Tha1	chr11	117869911	117873911	K4me1
ENSMUSG00000017715.11	Pgs1	chr11	117998794	118002794	K4me1
ENSMUSG00000017716.15	Birc5	chr11	117847318	117851318	K4me3 K27ac
ENSMUSG00000017718.15	Afmid	chr11	117823980	117827980	Bivalent
ENSMUSG00000017721.15	Pigt	chr2	164495519	164499519	K4me3 K27ac
ENSMUSG00000017724.14	Etv4	chr11	101782848	101786848	K4me3
ENSMUSG00000017734.15	Dbndd2	chr2	164484105	164488105	K4me3
ENSMUSG00000017747.13	Ghdc	chr11	100768942	100772942	K4me3
ENSMUSG00000017754.13	Pltp	chr2	164855711	164859711	Bivalent
ENSMUSG00000017760.16	Ctsa	chr2	164832309	164836309	K4me3 K27ac
ENSMUSG00000017764.2	Zswim1	chr2	164820685	164824685	K4me3 K27ac
ENSMUSG00000017765.17	Slc12a4	chr8	105962420	105966420	K4me3
ENSMUSG00000017774.19	Myo1c	chr11	75649509	75653509	K4me3
ENSMUSG00000017776.15	Crk	chr11	75677283	75681283	K4me3 K27ac
ENSMUSG00000017778.14	Cox7c	chr13	86044904	86048904	Bivalent
ENSMUSG00000017781.17	Pitpna	chr11	75586096	75590096	K4me3 K27ac
ENSMUSG00000017801.15	Mlx	chr11	101085303	101089303	K4me3 K27ac
ENSMUSG00000017802.14	Retreg3	chr11	101117765	101121765	K4me3 K4me1 K27ac
ENSMUSG00000017817.11	Jph2	chr2	163395949	163399949	Repressed
ENSMUSG00000017830.15	Dhx58	chr11	100697235	100701235	Unmarked
ENSMUSG00000017831.8	Rab5a	chr17	53477233	53481233	K4me3 K27ac
ENSMUSG00000017837.12	Nkiras2	chr11	100620947	100624947	K4me3 K4me1 K27ac
ENSMUSG00000017843.14	Ppp2r5c	chr12	110483858	110487858	K4me3 K4me1 K27ac
ENSMUSG00000017858.12	Ift52	chr2	163020442	163024442	Unmarked
ENSMUSG00000017861.11	Mybl2	chr2	163052686	163056686	Unmarked
ENSMUSG00000017868.16	Sgk2	chr2	162985501	162989501	K4me3 K4me1 K27ac
ENSMUSG00000017897.18	Eya2	chr2	165767185	165771185	K4me1
ENSMUSG00000017929.13	B4galt5	chr2	167311855	167315855	K4me1 K27ac
ENSMUSG00000017943.15	Gdap1l1	chr2	163436475	163440475	K4me3 K4me1 K27ac
ENSMUSG00000017950.16	Hnf4a	chr2	163545187	163549187	Unmarked
ENSMUSG00000017969.13	Ptgis	chr2	167238589	167242589	Repressed
ENSMUSG00000017978.18	Cadps2	chr6	23837143	23841143	K4me3
ENSMUSG00000017999.16	Ddx27	chr2	167025541	167029541	Unmarked
ENSMUSG00000018001.18	Cyth3	chr5	143649240	143653240	Unmarked
ENSMUSG00000018008.8	Cyth4	chr15	78595148	78599148	Unmarked
ENSMUSG00000018012.11	Rac3	chr11	120719469	120723469	Unmarked
ENSMUSG00000018040.9	Rrp7a	chr15	83115616	83119616	Unmarked
ENSMUSG00000018042.18	Cyb5r3	chr15	83168177	83172177	K4me3 K4me1 K27ac
ENSMUSG00000018068.13	Ints2	chr11	86227233	86231233	Unmarked
ENSMUSG00000018076.12	Med13l	chr5	118558678	118562678	K4me3 K27ac
ENSMUSG00000018102.5	H2bc4	chr13	23682198	23686198	K4me3 K27ac
ENSMUSG00000018126.15	Baiap2l2	chr15	79259297	79263297	Bivalent
ENSMUSG00000018143.10	Mafk	chr5	139789533	139793533	K4me3 K4me1 K27ac
ENSMUSG00000018160.15	Med1	chr11	98191276	98195276	K4me3 K27ac
ENSMUSG00000018166.8	Erbb3	chr10	128587652	128591652	K4me3
ENSMUSG00000018167.10	Stard3	chr11	98356443	98360443	K4me3 K27ac
ENSMUSG00000018169.12	Mfng	chr15	78765164	78769164	Unmarked
ENSMUSG00000018171.9	Vmp1	chr11	86600263	86604263	K4me1
ENSMUSG00000018189.12	Uchl5	chr1	143775280	143779280	K4me3 K27ac
ENSMUSG00000018196.18	Glrx2	chr1	143737617	143741617	K4me3 K27ac
ENSMUSG00000018199.9	Ro60	chr1	143769026	143773026	K4me1 K27ac
ENSMUSG00000018209.15	Stk4	chr2	164072137	164076137	K4me3
ENSMUSG00000018217.12	Pmp22	chr11	63129511	63133511	K4me1 K27ac
ENSMUSG00000018238.6	Gdf9	chr11	53430841	53434841	Unmarked
ENSMUSG00000018239.9	Zcchc10	chr11	53325399	53329399	Unmarked
ENSMUSG00000018286.6	Psmb6	chr11	70524109	70528109	K4me3
ENSMUSG00000018287.12	Spag7	chr11	70667218	70671218	K4me3 K27ac
ENSMUSG00000018293.4	Pfn1	chr11	70652621	70656621	K4me3 K27ac
ENSMUSG00000018322.10	Tomm34	chr2	164063715	164067715	Unmarked
ENSMUSG00000018326.9	Ywhab	chr2	163993502	163997502	K4me3 K27ac
ENSMUSG00000018334.18	Ksr1	chr11	79144407	79148407	K4me3
ENSMUSG00000018339.11	Gpx3	chr11	54900771	54904771	Bivalent
ENSMUSG00000018340.13	Anxa6	chr11	55031445	55035445	K4me3 K4me1
ENSMUSG00000018347.16	Zkscan6	chr11	65805243	65809243	K4me3 K27ac
ENSMUSG00000018362.14	Kpna2	chr11	106996779	107000779	K4me3 K27ac
ENSMUSG00000018363.16	Smurf2	chr11	106918359	106922359	K4me3 K27ac
ENSMUSG00000018372.13	Cep95	chr11	106812222	106816222	Unmarked
ENSMUSG00000018377.10	Vezf1	chr11	88066278	88070278	K4me3 K4me1 K27ac
ENSMUSG00000018378.13	Cuedc1	chr11	88185820	88189820	K4me1 K27ac
ENSMUSG00000018379.17	Srsf1	chr11	88045717	88049717	K4me3 K27ac
ENSMUSG00000018381.15	Abi3	chr11	95840409	95844409	Repressed
ENSMUSG00000018387.12	Shroom1	chr11	53455204	53459204	K4me3
ENSMUSG00000018395.19	Kif3a	chr11	53565378	53569378	K4me3
ENSMUSG00000018398.18	Sept8	chr11	53517745	53521745	K4me3 K4me1
ENSMUSG00000018401.17	Mtmr4	chr11	87590218	87594218	K4me3 K27ac
ENSMUSG00000018405.7	Mrm1	chr11	84816734	84820734	K4me3 K27ac
ENSMUSG00000018412.16	Kansl1	chr11	104466861	104470861	K4me3
ENSMUSG00000018415.14	Gid4	chr11	60415261	60419261	K4me3 K27ac
ENSMUSG00000018417.14	Myo1b	chr1	51765392	51769392	Unmarked
ENSMUSG00000018425.18	Dhx40	chr11	86799088	86803088	Unmarked
ENSMUSG00000018427.8	Ypel2	chr11	86991707	86995707	K4me3 K4me1 K27ac
ENSMUSG00000018428.15	Akap1	chr11	88842498	88846498	Unmarked
ENSMUSG00000018433.14	Nol11	chr11	107187381	107191381	Bivalent
ENSMUSG00000018442.13	Derl2	chr11	71017242	71021242	K4me3 K27ac
ENSMUSG00000018446.8	C1qbp	chr11	70981026	70985026	K4me3
ENSMUSG00000018449.12	Rpain	chr11	70968212	70972212	K4me3 K27ac
ENSMUSG00000018451.7	6330403K07Rik	chr11	71031513	71035513	Bivalent
ENSMUSG00000018476.7	Kdm6b	chr11	69411675	69415675	K4me3 K4me1 K27ac
ENSMUSG00000018481.9	Appbp2	chr11	85233130	85237130	K4me3 K27ac
ENSMUSG00000018500.2	Adora2b	chr11	62246983	62250983	K4me3 K4me1
ENSMUSG00000018501.17	Ncor1	chr11	62455332	62459332	K4me3 K4me1 K27ac
ENSMUSG00000018507.16	Trpv2	chr11	62573546	62577546	K4me3
ENSMUSG00000018509.8	Cenpv	chr11	62525896	62529896	Unmarked
ENSMUSG00000018537.16	Pcgf2	chr11	97697641	97701641	K4me3
ENSMUSG00000018541.10	Cwc25	chr11	97750710	97754710	Unmarked
ENSMUSG00000018547.8	Pip4k2b	chr11	97742704	97746704	K4me3 K27ac
ENSMUSG00000018548.15	Trim37	chr11	87188073	87192073	Unmarked
ENSMUSG00000018554.13	Ybx2	chr11	69933795	69937795	K4me1
ENSMUSG00000018559.16	Ctdnep1	chr11	69981719	69985719	K4me1 K27ac
ENSMUSG00000018565.17	Elp5	chr11	69978211	69982211	K4me3 K27ac
ENSMUSG00000018566.14	Slc2a4	chr11	69946145	69950145	Bivalent
ENSMUSG00000018567.14	Gabarap	chr11	69989683	69993683	K4me3 K4me1 K27ac
ENSMUSG00000018570.17	2810408A11Rik	chr11	69898957	69902957	K4me3 K27ac
ENSMUSG00000018572.10	Phf23	chr11	69995108	69999108	K4me3 K27ac
ENSMUSG00000018574.14	Acadvl	chr11	70013408	70017408	K4me3 K4me1
ENSMUSG00000018583.5	G3bp1	chr11	55467684	55471684	K4me3 K27ac
ENSMUSG00000018585.9	Atox1	chr11	55459239	55463239	K4me3
ENSMUSG00000018593.13	Sparc	chr11	55417900	55421900	K4me3
ENSMUSG00000018599.5	Mief2	chr11	60726444	60730444	K4me3 K27ac
ENSMUSG00000018604.18	Tbx3	chr5	119668861	119672861	Repressed
ENSMUSG00000018634.10	Crhr1	chr11	104130854	104134854	Repressed
ENSMUSG00000018648.15	Dusp14	chr11	84066579	84070579	K4me3 K4me1
ENSMUSG00000018651.14	Tada2a	chr11	84091854	84095854	Unmarked
ENSMUSG00000018654.17	Ikzf1	chr11	11684444	11688444	Repressed
ENSMUSG00000018659.12	Pnpo	chr11	96941958	96945958	K4me3 K27ac
ENSMUSG00000018661.17	Cog1	chr11	113657282	113661282	K4me1
ENSMUSG00000018666.13	Cbx1	chr11	96787158	96791158	K4me3
ENSMUSG00000018669.14	Cdk5rap3	chr11	96914367	96918367	K4me3 K27ac
ENSMUSG00000018672.15	Copz2	chr11	96851899	96855899	Unmarked
ENSMUSG00000018677.9	Slc25a39	chr11	102402493	102406493	K4me1
ENSMUSG00000018678.13	Sp2	chr11	96980959	96984959	Unmarked
ENSMUSG00000018697.14	Aatf	chr11	84489550	84493550	K4me1
ENSMUSG00000018698.15	Lhx1	chr11	84520067	84524067	K4me3 K27ac
ENSMUSG00000018707.13	Dync1h1	chr12	110599451	110603451	K4me3 K27ac
ENSMUSG00000018733.10	Pex12	chr11	83296897	83300897	K4me3 K27ac
ENSMUSG00000018736.14	Ndel1	chr11	68851135	68855135	K4me3 K4me1 K27ac
ENSMUSG00000018740.14	Slc25a35	chr11	68966146	68970146	K4me3 K27ac
ENSMUSG00000018750.14	Zbtb4	chr11	69763993	69767993	K4me3 K4me1 K27ac
ENSMUSG00000018752.19	Tnfsfm13	chr11	69693809	69697809	K4me3
ENSMUSG00000018761.14	Mpdu1	chr11	69656253	69660253	Unmarked
ENSMUSG00000018765.5	Fxr2	chr11	69630989	69634989	K4me3 K4me1
ENSMUSG00000018796.13	Acsl1	chr8	46469036	46473036	K4me3
ENSMUSG00000018800.14	Abca5	chr11	110335678	110339678	K4me3 K27ac
ENSMUSG00000018809.2	Smyd4	chr11	75397608	75401608	Unmarked
ENSMUSG00000018819.10	Lsp1	chr7	142487016	142491016	Unmarked
ENSMUSG00000018820.13	Zfyve27	chr19	42168566	42172566	K4me3 K27ac
ENSMUSG00000018821.3	Avpi1	chr19	42126989	42130989	K4me3 K27ac
ENSMUSG00000018830.10	Myh11	chr16	14289363	14293363	K4me3 K4me1
ENSMUSG00000018841.17	Rad51d	chr11	82888589	82892589	K4me3 K27ac
ENSMUSG00000018845.14	Unc45b	chr11	82931601	82935601	Repressed
ENSMUSG00000018846.8	Pank3	chr11	35767483	35771483	K4me3 K4me1 K27ac
ENSMUSG00000018848.4	Rars	chr11	35818109	35822109	Unmarked
ENSMUSG00000018849.6	Wwc1	chr11	35873712	35877712	Bivalent
ENSMUSG00000018858.15	Mrpl58	chr11	115408159	115412159	Unmarked
ENSMUSG00000018861.8	Fdxr	chr11	115274914	115278914	K4me3 K27ac
ENSMUSG00000018865.9	Sult4a1	chr15	84103754	84107754	K4me3
ENSMUSG00000018882.12	Mrpl45	chr11	97313715	97317715	K4me3 K27ac
ENSMUSG00000018899.16	Irf1	chr11	53768486	53772486	K4me3 K4me1 K27ac
ENSMUSG00000018900.7	Slc22a5	chr11	53889660	53893660	K4me3
ENSMUSG00000018906.14	P4ha2	chr11	54099067	54103067	K4me3
ENSMUSG00000018909.15	Arrb1	chr7	99533465	99537465	K4me3
ENSMUSG00000018920.11	Cxcl16	chr11	70457984	70461984	K4me3 K4me1
ENSMUSG00000018921.11	Pelp1	chr11	70408028	70412028	K4me3 K4me1
ENSMUSG00000018923.13	Med11	chr11	70449918	70453918	K4me3 K27ac
ENSMUSG00000018927.3	Ccl6	chr11	83591087	83595087	Unmarked
ENSMUSG00000018930.3	Ccl4	chr11	83660583	83664583	Repressed
ENSMUSG00000018931.3	Natd1	chr11	60912750	60916750	K4me3 K27ac
ENSMUSG00000018932.9	Map2k3	chr11	60930065	60934065	K4me3 K27ac
ENSMUSG00000018965.11	Ywhah	chr5	33019790	33023790	K4me3 K4me1 K27ac
ENSMUSG00000018974.7	Sart3	chr5	113743595	113747595	Unmarked
ENSMUSG00000018983.9	E2f2	chr4	136178782	136182782	K4me3 K27ac
ENSMUSG00000018986.10	Slfn3	chr11	83206795	83210795	Repressed
ENSMUSG00000018995.12	Nars2	chr7	97038003	97042003	K4me1
ENSMUSG00000019039.14	Dalrd3	chr9	108567909	108571909	K4me3 K27ac
ENSMUSG00000019054.13	Fis1	chr5	136960432	136964432	K4me3 K27ac
ENSMUSG00000019055.15	Plod1	chr4	147934767	147938767	K4me3
ENSMUSG00000019080.8	Mfsd3	chr15	76700433	76704433	K4me3 K27ac
ENSMUSG00000019082.18	Slc25a22	chr7	141432594	141436594	K4me3 K4me1
ENSMUSG00000019122.8	Ccl9	chr11	83575142	83579142	Unmarked
ENSMUSG00000019124.10	Scrn1	chr6	54512817	54516817	K4me1
ENSMUSG00000019132.11	BC005537	chr13	24800019	24804019	K4me3 K27ac
ENSMUSG00000019143.15	Hars2	chr18	36781268	36785268	K4me3 K27ac
ENSMUSG00000019146.2	Cacng2	chr15	78118028	78122028	Repressed
ENSMUSG00000019158.9	Tmem160	chr7	16450962	16454962	Unmarked
ENSMUSG00000019173.11	Rab5c	chr11	100736176	100740176	K4me3 K27ac
ENSMUSG00000019178.17	Styxl1	chr5	135776291	135780291	K4me3 K27ac
ENSMUSG00000019179.10	Mdh2	chr5	135776479	135780479	K4me3 K27ac
ENSMUSG00000019188.16	H13	chr2	152689838	152693838	K4me1
ENSMUSG00000019189.13	Rnf145	chr11	44517441	44521441	K4me3 K4me1 K27ac
ENSMUSG00000019194.15	Scn1b	chr7	31124844	31128844	K4me3
ENSMUSG00000019210.10	Atp6v1e1	chr6	120820685	120824685	K4me3 K27ac
ENSMUSG00000019214.14	Chtf18	chr17	25717785	25721785	Repressed
ENSMUSG00000019235.9	Rps6kl1	chr12	85149250	85153250	K4me3
ENSMUSG00000019254.16	Ppp1r12c	chr7	4480634	4484634	Unmarked
ENSMUSG00000019256.17	Ahr	chr12	35532623	35536623	K4me3 K27ac
ENSMUSG00000019261.3	Map1s	chr8	70903989	70907989	K4me3 K27ac
ENSMUSG00000019295.8	Tmem129	chr5	33655856	33659856	K4me3 K27ac
ENSMUSG00000019297.9	Nop9	chr14	55747225	55751225	Unmarked
ENSMUSG00000019301.5	Hsd17b1	chr11	101076410	101080410	Unmarked
ENSMUSG00000019302.16	Atp6v0a1	chr11	101009820	101013820	K4me3 K27ac
ENSMUSG00000019303.14	Psmc3ip	chr11	101093400	101097400	K4me3 K27ac
ENSMUSG00000019312.10	Grb7	chr11	98445047	98449047	K4me3 K27ac
ENSMUSG00000019320.14	Noxo1	chr17	24696313	24700313	K4me3 K4me1
[truncated: 13,669 more rows]
